# Supplementary material for: Position-Specific Metabolic Probing and Metagenomics of Microbial Communities Reveal Conserved Central Carbon Metabolic Network Activities at High Temperatures
Source: Front Microbiol. 2019 Jul 5;10:1427. doi: 10.3389/fmicb.2019.01427 (PMC6624737; doi:10.3389/fmicb.2019.01427)
Supplement: Supplementary file 6 [file Table_6.XLSX]

## Sheet: Sheet1
Table S6: Normalized NOISeq-sim data for all pair-wise comparisons of KO abundance (A) and KOs that showed a significant difference (prob ≥ 0.9) in abundance in any pairwise comparison (B).
A. Normalized NOISeq-sim data (reads/gigabase pair) for all pair-wise comparisons of KO abundance (e.g., gbs60_mean). Non-normalized KO abundance data for each metagenome was obtained from JGI IMG (https://img.jgi.doe.gov/cgi-bin/m/main.cgi) as described in the methods. M, log2-ratio between two sites ; D, difference value between two sites ; prob, probability.																					B. KOs that showed a significant difference (prob ≥ 0.9) in abundance in any pairwise comparison. Normalized NOISeq-sim data for all pair-wise comparisons of KO abundance (e.g., gbs60_mean) was used. Non-normalized KO abundance data for each metagenome was obtained from JGI IMG (https://img.jgi.doe.gov/cgi-bin/m/main.cgi) as described in the methods. M, log2-ratio between two sites ; D, differenc…
	Simplified Names	gbs60_mean	gbs70_mean	M	D	prob		gbs60_mean	gbs85_mean	M	D	prob		gbs70_mean	gbs85_mean	M	D	prob				Simplified Names	gbs60_mean	gbs70_mean	M	D	prob		gbs60_mean	gbs85_mean	M	D	prob		gbs70_mean	gbs85_mean	M	D	prob
KO:K00001	E1.1.1.1, adh; alcohol dehydrogenase [EC:1.1.1.1]	236.949	133.865	0.823797	103.084	0.718835		236.949	346.39	-0.547823	109.441	0.698787		133.865	346.39	-1.37162	212.525	0.861102			KO:K00004	BDH, butB; (R,R)-butanediol dehydrogenase / meso-butanediol dehydrogenase / diacetyl reductase [EC:1.1.1.4 1.1.1.- 1.1.1.303]	13.1462	3.14669	2.06274	9.99956	0.770364		13.1462	0.114861	6.83862	13.0314	0.929239		3.14669	0.114861	4.77588	3.03183	0.571606
KO:K00002	AKR1A1, adh; alcohol dehydrogenase (NADP+) [EC:1.1.1.2]	1.18694	0.0284763	5.38134	1.15846	0.494595		1.18694	0.581995	1.02817	0.604944	0.348547		0.0187795	0.581995	-4.95378	0.563215	0.308921			KO:K00005	gldA; glycerol dehydrogenase [EC:1.1.1.6]	56.2369	1.64871	5.09211	54.5882	0.865582		56.2369	0.222784	7.97973	56.0142	0.997031		1.64871	0.222784	2.88762	1.42593	0.418746
KO:K00003	E1.1.1.3; homoserine dehydrogenase [EC:1.1.1.3]	298.67	315.97	-0.081236	17.3002	0.329246		298.67	383.294	-0.3599	84.6242	0.615722		315.97	383.294	-0.278664	67.324	0.548804			KO:K00009	mtlD; mannitol-1-phosphate 5-dehydrogenase [EC:1.1.1.17]	68.469	33.1247	1.04754	35.3443	0.786083		68.469	0.0187795	11.8321	68.4502	0.99977		33.1247	0.0187795	10.7845	33.1059	0.995252
KO:K00004	BDH, butB; (R,R)-butanediol dehydrogenase / meso-butanediol dehydrogenase / diacetyl reductase [EC:1.1.1.4 1.1.1.- 1.1.1.303]	13.1462	3.14669	2.06274	9.99956	0.770364		13.1462	0.114861	6.83862	13.0314	0.929239		3.14669	0.114861	4.77588	3.03183	0.571606			KO:K00021	HMGCR; hydroxymethylglutaryl-CoA reductase (NADPH) [EC:1.1.1.34]	15.6996	20.8758	-0.411103	5.1762	0.467608		15.6996	256.14	-4.02813	240.44	0.898035		20.8758	256.14	-3.61702	235.264	0.902708
KO:K00005	gldA; glycerol dehydrogenase [EC:1.1.1.6]	56.2369	1.64871	5.09211	54.5882	0.865582		56.2369	0.222784	7.97973	56.0142	0.997031		1.64871	0.222784	2.88762	1.42593	0.418746			KO:K00023	phbB; acetoacetyl-CoA reductase [EC:1.1.1.36]	30.402	11.8822	1.35536	18.5198	0.787992		30.402	0.210292	7.17563	30.1917	0.981089		11.8822	0.210292	5.82026	11.6719	0.878675
KO:K00008	SORD, gutB; L-iditol 2-dehydrogenase [EC:1.1.1.14]	343.906	375.521	-0.126878	31.6146	0.368504		343.906	576.711	-0.745834	232.805	0.76544		375.521	576.711	-0.618957	201.191	0.734807			KO:K00034	gdh; glucose 1-dehydrogenase [EC:1.1.1.47]	53.2157	23.4727	1.18087	29.743	0.791586		53.2157	141.377	-1.40963	88.1617	0.854736		23.4727	141.377	-2.5905	117.905	0.900657
KO:K00009	mtlD; mannitol-1-phosphate 5-dehydrogenase [EC:1.1.1.17]	68.469	33.1247	1.04754	35.3443	0.786083		68.469	0.0187795	11.8321	68.4502	0.99977		33.1247	0.0187795	10.7845	33.1059	0.995252			KO:K00046	idnO; gluconate 5-dehydrogenase [EC:1.1.1.69]	31.9242	55.6244	-0.801069	23.7002	0.70224		31.9242	0.571319	5.80421	31.3528	0.962795		55.6244	0.571319	6.60528	55.0531	0.965709
KO:K00010	iolG; myo-inositol 2-dehydrogenase / D-chiro-inositol 1-dehydrogenase [EC:1.1.1.18 1.1.1.369]	88.768	99.2146	-0.160511	10.4465	0.388946		88.768	20.783	2.09463	67.985	0.888125		99.2146	20.783	2.25514	78.4315	0.894924			KO:K00050	ttuD; hydroxypyruvate reductase [EC:1.1.1.81]	131.041	169.34	-0.36991	38.2996	0.541556		131.041	19.913	2.71823	111.128	0.896017		169.34	19.913	3.08814	149.427	0.902169
KO:K00012	UGDH, ugd; UDPglucose 6-dehydrogenase [EC:1.1.1.22]	325.665	299.179	0.122378	26.4857	0.359427		325.665	571.766	-0.812037	246.101	0.776573		299.179	571.766	-0.934416	272.587	0.793646			KO:K00064	E1.1.1.122; D-threo-aldose 1-dehydrogenase [EC:1.1.1.122]	41.1336	4.72951	3.12055	36.4041	0.86343		41.1336	0.0187795	11.0969	41.1148	0.998401		4.72951	0.0187795	7.97639	4.71073	0.721208
KO:K00013	hisD; histidinol dehydrogenase [EC:1.1.1.23]	238.743	281.703	-0.238718	42.9603	0.453467		238.743	537.761	-1.17151	299.018	0.840905		281.703	537.761	-0.932789	256.058	0.793646			KO:K00065	kduD; 2-dehydro-3-deoxy-D-gluconate 5-dehydrogenase [EC:1.1.1.127]	69.4831	55.5673	0.322426	13.9158	0.507343		69.4831	0.75909	6.51625	68.724	0.967583		55.5673	0.75909	6.19382	54.8082	0.965698
KO:K00014	aroE; shikimate dehydrogenase [EC:1.1.1.25]	216.124	253.748	-0.231532	37.6232	0.447507		216.124	338.125	-0.645695	122.001	0.741355		253.748	338.125	-0.414163	84.3776	0.625299			KO:K00066	algD; GDP-mannose 6-dehydrogenase [EC:1.1.1.132]	78.7639	27.8625	1.49921	50.9013	0.817014		78.7639	0.27296	8.1727	78.4909	0.998923		27.8625	0.27296	6.6735	27.5896	0.956565
KO:K00015	gyaR, GOR1; glyoxylate reductase [EC:1.1.1.26]	111.474	145.348	-0.382811	33.8747	0.545617		111.474	308.305	-1.46765	196.831	0.857537		145.348	308.305	-1.08484	162.956	0.84136			KO:K00068	srlD; sorbitol-6-phosphate 2-dehydrogenase [EC:1.1.1.140]	67.1051	22.8945	1.55142	44.2106	0.816819		67.1051	0.112813	9.21634	66.9923	0.999728		22.8945	0.112813	7.66492	22.7816	0.975932
KO:K00016	LDH, ldh; L-lactate dehydrogenase [EC:1.1.1.27]	131.763	53.2813	1.30624	78.4817	0.803253		131.763	60.3617	1.12624	71.4012	0.83709		53.2813	60.3617	-0.180006	7.08046	0.444994			KO:K00101	lldD; L-lactate dehydrogenase (cytochrome) [EC:1.1.2.3]	19.4016	11.8117	0.715959	7.58991	0.584982		19.4016	0.0187795	10.0128	19.3828	0.976301		11.8117	0.0187795	9.29685	11.7929	0.912298
KO:K00018	hprA; glycerate dehydrogenase [EC:1.1.1.29]	3.83858	2.9764	0.367005	0.862182	0.2862		3.83858	23.9976	-2.64425	20.159	0.875549		2.9764	23.9976	-3.01125	21.0212	0.88095			KO:K00112	glpB; glycerol-3-phosphate dehydrogenase subunit B [EC:1.1.5.3]	29.9315	0.0284763	10.0377	29.903	0.995179		29.9315	0.0187795	10.6383	29.9127	0.993749		NA	NA	NA	NA	NA
KO:K00019	E1.1.1.30, bdh; 3-hydroxybutyrate dehydrogenase [EC:1.1.1.30]	30.1763	23.8581	0.338933	6.31812	0.469712		30.1763	8.75123	1.78586	21.425	0.859022		23.8581	8.75123	1.44692	15.1069	0.816987			KO:K00113	glpC; glycerol-3-phosphate dehydrogenase subunit C [EC:1.1.5.3]	34.9354	22.0418	0.664449	12.8936	0.633015		34.9354	226.829	-2.69884	191.894	0.896028		22.0418	226.829	-3.36329	204.787	0.902579
KO:K00020	mmsB, HIBADH; 3-hydroxyisobutyrate dehydrogenase [EC:1.1.1.31]	175.219	175.813	-0.00488392	0.594168	0.2862		175.219	544.772	-1.6365	369.554	0.875486		175.813	544.772	-1.63161	368.96	0.882028			KO:K00114	exaA; alcohol dehydrogenase (cytochrome c) [EC:1.1.2.8]	5.58626	15.8163	-1.50146	10.2301	0.734534		5.58626	0.0187795	8.21658	5.56748	0.792714		15.8163	0.0187795	9.71804	15.7975	0.951864
KO:K00021	HMGCR; hydroxymethylglutaryl-CoA reductase (NADPH) [EC:1.1.1.34]	15.6996	20.8758	-0.411103	5.1762	0.467608		15.6996	256.14	-4.02813	240.44	0.898035		20.8758	256.14	-3.61702	235.264	0.902708			KO:K00121	frmA, ADH5, adhC; S-(hydroxymethyl)glutathione dehydrogenase / alcohol dehydrogenase [EC:1.1.1.284 1.1.1.1]	35.483	124.424	-1.81007	88.941	0.844069		35.483	2.61869	3.76021	32.8643	0.893498		124.424	2.61869	5.57027	121.805	0.902755
KO:K00022	HADH; 3-hydroxyacyl-CoA dehydrogenase [EC:1.1.1.35]	0.126424	0.0284763	2.15044	0.0979479	0.2862		0.126424	0.0187795	2.75104	0.107645	0.348547		NA	NA	NA	NA	NA			KO:K00122	FDH; formate dehydrogenase [EC:1.17.1.9]	39.5716	26.9695	0.553134	12.602	0.590183		39.5716	0.0187795	11.0411	39.5528	0.99792		26.9695	0.0187795	10.488	26.9507	0.989086
KO:K00023	phbB; acetoacetyl-CoA reductase [EC:1.1.1.36]	30.402	11.8822	1.35536	18.5198	0.787992		30.402	0.210292	7.17563	30.1917	0.981089		11.8822	0.210292	5.82026	11.6719	0.878675			KO:K00125	fdhB; formate dehydrogenase, beta subunit [EC:1.17.1.9]	22.5398	39.033	-0.79222	16.4932	0.683307		22.5398	0.0187795	10.2291	22.521	0.98411		39.033	0.0187795	11.0213	39.0142	0.997714
KO:K00024	mdh; malate dehydrogenase [EC:1.1.1.37]	187.134	269.589	-0.526687	82.4546	0.621465		187.134	493.799	-1.39985	306.665	0.85484		269.589	493.799	-0.873163	224.21	0.788429			KO:K00131	gapN; glyceraldehyde-3-phosphate dehydrogenase (NADP+) [EC:1.2.1.9]	88.6356	51.5465	0.782011	37.0891	0.708707		88.6356	0.498272	7.47481	88.1373	0.994104		51.5465	0.498272	6.6928	51.0482	0.96558
KO:K00027	ME2, sfcA, maeA; malate dehydrogenase (oxaloacetate-decarboxylating) [EC:1.1.1.38]	171.221	148.919	0.201337	22.3026	0.422702		171.221	554.514	-1.69536	383.293	0.875925		148.919	554.514	-1.8967	405.596	0.886131			KO:K00132	E1.2.1.10; acetaldehyde dehydrogenase (acetylating) [EC:1.2.1.10]	12.6892	14.9008	-0.231781	2.21152	0.367092		12.6892	0.0187795	9.40023	12.6705	0.93317		14.9008	0.0187795	9.63201	14.882	0.944033
KO:K00029	E1.1.1.40, maeB; malate dehydrogenase (oxaloacetate-decarboxylating)(NADP+) [EC:1.1.1.40]	41.4401	55.8396	-0.430262	14.3995	0.564755		41.4401	35.0354	0.242212	6.40465	0.493602		55.8396	35.0354	0.672474	20.8042	0.724842			KO:K00146	feaB; phenylacetaldehyde dehydrogenase [EC:1.2.1.39]	73.0665	37.6125	0.957997	35.454	0.731691		73.0665	0.0187795	11.9258	73.0477	0.999812		37.6125	0.0187795	10.9678	37.5938	0.99721
KO:K00030	IDH3; isocitrate dehydrogenase (NAD+) [EC:1.1.1.41]	128.726	85.7883	0.585446	42.9373	0.663245		128.726	38.8615	1.72788	89.864	0.875852		85.7883	38.8615	1.14244	46.9268	0.843693			KO:K00153	E1.1.1.306; S-(hydroxymethyl)mycothiol dehydrogenase [EC:1.1.1.306]	0.0804166	0.0284763	1.49773	0.0519403	0.2862		0.0804166	13.7106	-7.41358	13.6302	0.936787		0.0187795	13.7106	-9.51192	13.6918	0.935135
KO:K00031	IDH1, IDH2, icd; isocitrate dehydrogenase [EC:1.1.1.42]	367.031	310.002	0.243626	57.0294	0.453535		367.031	375.153	-0.0315736	8.12108	0.362377		310.002	375.153	-0.2752	65.1505	0.548792			KO:K00163	aceE; pyruvate dehydrogenase E1 component [EC:1.2.4.1]	82.1492	11.8453	2.79393	70.3038	0.863674		82.1492	0.0187795	12.0949	82.1304	0.999854		11.8453	0.0187795	9.30095	11.8266	0.912298
KO:K00032	E1.1.1.43; phosphogluconate 2-dehydrogenase [EC:1.1.1.43]	0.121736	0.0284763	2.09593	0.0932601	0.2862		0.121736	0.0187795	2.69653	0.102957	0.348547		NA	NA	NA	NA	NA			KO:K00164	OGDH, sucA; 2-oxoglutarate dehydrogenase E1 component [EC:1.2.4.2]	79.1274	37.7926	1.06607	41.3348	0.787778		79.1274	0.0187795	12.0408	79.1086	0.999843		37.7926	0.0187795	10.9747	37.7738	0.99721
KO:K00033	PGD, gnd, gntZ; 6-phosphogluconate dehydrogenase [EC:1.1.1.44 1.1.1.343]	203.517	169.677	0.262363	33.8406	0.473189		203.517	293.591	-0.528655	90.0736	0.693696		169.677	293.591	-0.791018	123.914	0.774232			KO:K00186	vorA; 2-oxoisovalerate ferredoxin oxidoreductase, alpha subunit [EC:1.2.7.7]	7.32812	44.9416	-2.61654	37.6134	0.861882		7.32812	0.0187795	8.60814	7.30934	0.852666		44.9416	0.0187795	11.2247	44.9228	0.998581
KO:K00034	gdh; glucose 1-dehydrogenase [EC:1.1.1.47]	53.2157	23.4727	1.18087	29.743	0.791586		53.2157	141.377	-1.40963	88.1617	0.854736		23.4727	141.377	-2.5905	117.905	0.900657			KO:K00187	vorB; 2-oxoisovalerate ferredoxin oxidoreductase, beta subunit [EC:1.2.7.7]	18.7685	57.0745	-1.60453	38.306	0.838537		18.7685	0.14566	7.00956	18.6228	0.959074		57.0745	0.14566	8.61409	56.9288	0.999226
KO:K00035	gal; D-galactose 1-dehydrogenase [EC:1.1.1.48]	0.619827	0.0284763	4.44403	0.59135	0.2862		0.619827	0.0187795	5.04464	0.601047	0.348547		NA	NA	NA	NA	NA			KO:K00189	vorG; 2-oxoisovalerate ferredoxin oxidoreductase, gamma subunit [EC:1.2.7.7]	10.3847	18.5298	-0.835384	8.14506	0.621747		10.3847	0.0187795	9.11109	10.3659	0.908708		18.5298	0.0187795	9.94647	18.511	0.968382
KO:K00036	G6PD, zwf; glucose-6-phosphate 1-dehydrogenase [EC:1.1.1.49 1.1.1.363]	187.578	90.6684	1.04882	96.9093	0.788333		187.578	76.0129	1.30317	111.565	0.846498		90.6684	76.0129	0.254356	14.6555	0.515299			KO:K00192	cdhA; acetyl-CoA decarbonylase/synthase complex subunit alpha [EC:1.2.7.4]	1.57862	25.8231	-4.03192	24.2444	0.856106		1.57862	0.124498	3.66447	1.45413	0.454317		25.8231	0.124498	7.69639	25.6986	0.982145
KO:K00038	E1.1.1.53; 3alpha(or 20beta)-hydroxysteroid dehydrogenase [EC:1.1.1.53]	0.107249	0.182108	-0.763829	0.0748589	0.2862		0.107249	0.0187795	2.51374	0.0884696	0.348547		0.182108	0.0187795	3.27757	0.163329	0.308921			KO:K00194	cdhD, acsD; acetyl-CoA decarbonylase/synthase complex subunit delta [EC:2.1.1.245]	32.8243	68.5501	-1.0624	35.7258	0.786336		32.8243	0.108226	8.24457	32.716	0.994543		68.5501	0.108226	9.30697	68.4419	0.99966
KO:K00039	rbtD; ribitol 2-dehydrogenase [EC:1.1.1.56]	0.746035	0.0284763	4.71141	0.717558	0.2862		0.746035	0.0187795	5.31201	0.727255	0.348547		NA	NA	NA	NA	NA			KO:K00195	cdhB; acetyl-CoA decarbonylase/synthase complex subunit epsilon	0.567218	12.8545	-4.50223	12.2873	0.803253		0.567218	0.0187795	4.91668	0.548439	0.348547		12.8545	0.0187795	9.4189	12.8357	0.924912
KO:K00040	uxuB; fructuronate reductase [EC:1.1.1.57]	0.26555	0.111286	1.25471	0.154264	0.2862		0.26555	0.0187795	3.82175	0.24677	0.348547		0.111286	0.0187795	2.56705	0.0925067	0.308921			KO:K00196	cooF; anaerobic carbon-monoxide dehydrogenase iron sulfur subunit	29.366	56.8811	-0.953804	27.5151	0.727756		29.366	0.0187795	10.6108	29.3472	0.993749		56.8811	0.0187795	11.5646	56.8624	0.999379
KO:K00041	uxaB; tagaturonate reductase [EC:1.1.1.58]	0.778327	0.18862	2.0449	0.589707	0.2862		0.778327	0.0187795	5.37315	0.759547	0.348547		0.18862	0.0187795	3.32825	0.16984	0.308921			KO:K00197	cdhE, acsC; acetyl-CoA decarbonylase/synthase complex subunit gamma [EC:2.1.1.245]	52.2266	91.0028	-0.801127	38.7762	0.710489		52.2266	0.18551	8.13714	52.0411	0.998526		91.0028	0.18551	8.93827	90.8173	0.999894
KO:K00042	garR, glxR; 2-hydroxy-3-oxopropionate reductase [EC:1.1.1.60]	70.3798	114.794	-0.705817	44.4144	0.68955		70.3798	266.329	-1.91998	195.95	0.879511		114.794	266.329	-1.21416	151.535	0.848136			KO:K00198	cooS, acsA; anaerobic carbon-monoxide dehydrogenase catalytic subunit [EC:1.2.7.4]	50.6499	112.246	-1.14803	61.5963	0.793767		50.6499	0.168864	8.22855	50.481	0.998453		112.246	0.168864	9.37659	112.077	0.999965
KO:K00045	E1.1.1.67, mtlK; mannitol 2-dehydrogenase [EC:1.1.1.67]	1.07289	0.0284763	5.2356	1.04442	0.494595		1.07289	0.0187795	5.83621	1.05411	0.524096		NA	NA	NA	NA	NA			KO:K00200	fwdA, fmdA; formylmethanofuran dehydrogenase subunit A [EC:1.2.7.12]	4.48062	17.4073	-1.95792	12.9267	0.782723		4.48062	0.0187795	7.8984	4.46184	0.749843		17.4073	0.0187795	9.85632	17.3885	0.963669
KO:K00046	idnO; gluconate 5-dehydrogenase [EC:1.1.1.69]	31.9242	55.6244	-0.801069	23.7002	0.70224		31.9242	0.571319	5.80421	31.3528	0.962795		55.6244	0.571319	6.60528	55.0531	0.965709			KO:K00201	fwdB, fmdB; formylmethanofuran dehydrogenase subunit B [EC:1.2.7.12]	5.5625	27.9782	-2.3305	22.4157	0.847244		5.5625	0.123703	5.49078	5.43879	0.691668		27.9782	0.123703	7.82128	27.8545	0.987843
KO:K00048	fucO; lactaldehyde reductase [EC:1.1.1.77]	0.965186	0.895797	0.107637	0.0693899	0.2862		0.965186	0.0187795	5.68358	0.946407	0.348547		0.895797	0.0187795	5.57594	0.877017	0.308921			KO:K00202	fwdC, fmdC; formylmethanofuran dehydrogenase subunit C [EC:1.2.7.12]	3.38238	15.0718	-2.15574	11.6895	0.782898		3.38238	0.0187795	7.49274	3.3636	0.695944		15.0718	0.0187795	9.64848	15.0531	0.951864
KO:K00049	GRHPR; glyoxylate/hydroxypyruvate reductase [EC:1.1.1.79 1.1.1.81]	1.07026	0.243128	2.13818	0.827136	0.2862		1.07026	0.0187795	5.83267	1.05148	0.524096		0.243128	0.0187795	3.69448	0.224348	0.308921			KO:K00203	fwdD, fmdD; formylmethanofuran dehydrogenase subunit D [EC:1.2.7.12]	1.1687	11.2488	-3.2668	10.0801	0.780541		1.1687	0.0187795	5.9596	1.14992	0.524096		11.2488	0.0187795	9.2264	11.23	0.912298
KO:K00050	ttuD; hydroxypyruvate reductase [EC:1.1.1.81]	131.041	169.34	-0.36991	38.2996	0.541556		131.041	19.913	2.71823	111.128	0.896017		169.34	19.913	3.08814	149.427	0.902169			KO:K00214	BLVRA, bvdR; biliverdin reductase [EC:1.3.1.24]	44.8592	0.0284763	10.6214	44.8307	0.999055		44.8592	0.0187795	11.222	44.8404	0.998902		NA	NA	NA	NA	NA
KO:K00052	leuB, IMDH; 3-isopropylmalate dehydrogenase [EC:1.1.1.85]	171.911	223.07	-0.375838	51.1594	0.546338		171.911	293.548	-0.771934	121.637	0.767364		223.07	293.548	-0.396097	70.4774	0.624045			KO:K00218	por; protochlorophyllide reductase [EC:1.3.1.33]	43.8925	0.0284763	10.59	43.8641	0.998958		43.8925	0.0187795	11.1906	43.8737	0.998766		NA	NA	NA	NA	NA
KO:K00053	ilvC; ketol-acid reductoisomerase [EC:1.1.1.86]	243.383	276.587	-0.1845	33.2031	0.407071		243.383	407.259	-0.742716	163.876	0.76475		276.587	407.259	-0.558216	130.673	0.700516			KO:K00228	CPOX, hemF; coproporphyrinogen III oxidase [EC:1.3.3.3]	48.1116	2.723	4.14312	45.3886	0.865056		48.1116	0.0187795	11.323	48.0929	0.999247		2.723	0.0187795	7.1799	2.70422	0.588898
KO:K00054	mvaA; hydroxymethylglutaryl-CoA reductase [EC:1.1.1.88]	80.7284	97.1158	-0.26663	16.3874	0.474231		80.7284	19.873	2.02227	60.8554	0.887968		97.1158	19.873	2.2889	77.2428	0.894924			KO:K00230	hemG; menaquinone-dependent protoporphyrinogen oxidase [EC:1.3.5.3]	36.8492	0.732075	5.6535	36.1172	0.953769		36.8492	0.0187795	10.9383	36.8304	0.997198		0.732075	0.0187795	5.28476	0.713296	0.308921
KO:K00055	E1.1.1.90; aryl-alcohol dehydrogenase [EC:1.1.1.90]	0.513345	0.180185	1.51045	0.333161	0.2862		0.513345	0.0187795	4.7727	0.494566	0.348547		0.180185	0.0187795	3.26225	0.161405	0.308921			KO:K00254	DHODH, pyrD; dihydroorotate dehydrogenase [EC:1.3.5.2]	111.183	47.8682	1.2158	63.315	0.80112		111.183	423.501	-1.92943	312.318	0.879542		47.8682	423.501	-3.14523	375.633	0.902169
KO:K00057	gpsA; glycerol-3-phosphate dehydrogenase (NAD(P)+) [EC:1.1.1.94]	158.597	145.523	0.124113	13.0734	0.359048		158.597	44.4458	1.83524	114.151	0.878946		145.523	44.4458	1.71113	101.077	0.882497			KO:K00255	ACADL; long-chain-acyl-CoA dehydrogenase [EC:1.3.8.8]	20.3164	0.0284763	9.47867	20.288	0.982187		20.3164	0.0187795	10.0793	20.2977	0.979615		NA	NA	NA	NA	NA
KO:K00058	serA, PHGDH; D-3-phosphoglycerate dehydrogenase / 2-oxoglutarate reductase [EC:1.1.1.95 1.1.1.399]	473.121	485.36	-0.0368464	12.2391	0.300799		473.121	509.72	-0.107494	36.5983	0.426186		485.36	509.72	-0.0706473	24.3592	0.358499			KO:K00260	gudB, rocG; glutamate dehydrogenase [EC:1.4.1.2]	18.4222	61.0328	-1.72814	42.6107	0.839823		18.4222	2.13628	3.10827	16.2859	0.860851		61.0328	2.13628	4.83641	58.8966	0.902239
KO:K00059	fabG; 3-oxoacyl-[acyl-carrier protein] reductase [EC:1.1.1.100]	970.979	1047.71	-0.109726	76.7299	0.351334		970.979	1716.59	-0.822031	745.607	0.777284		1047.71	1716.59	-0.712305	668.877	0.755264			KO:K00263	E1.4.1.9; leucine dehydrogenase [EC:1.4.1.9]	25.3715	53.1795	-1.06766	27.808	0.782723		25.3715	0.0187795	10.3998	25.3527	0.989233		53.1795	0.0187795	11.4675	53.1607	0.999297
KO:K00060	tdh; threonine 3-dehydrogenase [EC:1.1.1.103]	107.106	123.515	-0.205641	16.4086	0.428155		107.106	135.378	-0.337953	28.272	0.600366		123.515	135.378	-0.132311	11.8634	0.413107			KO:K00273	DAO, aao; D-amino-acid oxidase [EC:1.4.3.3]	2.92715	13.4022	-2.1949	10.475	0.77126		2.92715	0.0187795	7.2842	2.90837	0.624409		13.4022	0.0187795	9.47909	13.3834	0.935135
KO:K00064	E1.1.1.122; D-threo-aldose 1-dehydrogenase [EC:1.1.1.122]	41.1336	4.72951	3.12055	36.4041	0.86343		41.1336	0.0187795	11.0969	41.1148	0.998401		4.72951	0.0187795	7.97639	4.71073	0.721208			KO:K00274	MAO, aofH; monoamine oxidase [EC:1.4.3.4]	183.145	41.6723	2.13583	141.473	0.85521		183.145	0.0187795	13.2515	183.126	1		41.6723	0.0187795	11.1157	41.6535	0.998159
KO:K00065	kduD; 2-dehydro-3-deoxy-D-gluconate 5-dehydrogenase [EC:1.1.1.127]	69.4831	55.5673	0.322426	13.9158	0.507343		69.4831	0.75909	6.51625	68.724	0.967583		55.5673	0.75909	6.19382	54.8082	0.965698			KO:K00276	AOC3, AOC2, tynA; primary-amine oxidase [EC:1.4.3.21]	14.8283	0.0284763	9.02438	14.7999	0.953935		14.8283	0.0187795	9.62498	14.8095	0.950951		NA	NA	NA	NA	NA
KO:K00066	algD; GDP-mannose 6-dehydrogenase [EC:1.1.1.132]	78.7639	27.8625	1.49921	50.9013	0.817014		78.7639	0.27296	8.1727	78.4909	0.998923		27.8625	0.27296	6.6735	27.5896	0.956565			KO:K00281	GLDC, gcvP; glycine dehydrogenase [EC:1.4.4.2]	75.0316	4.22511	4.15044	70.8065	0.865855		75.0316	0.0187795	11.9641	75.0129	0.999833		4.22511	0.0187795	7.81369	4.20633	0.721208
KO:K00067	rfbD, rmlD; dTDP-4-dehydrorhamnose reductase [EC:1.1.1.133]	276.647	236.05	0.228951	40.5965	0.447546		276.647	150.323	0.879981	126.324	0.784915		236.05	150.323	0.651031	85.7276	0.742614			KO:K00287	DHFR, folA; dihydrofolate reductase [EC:1.5.1.3]	13.9632	3.28806	2.08632	10.6751	0.770364		13.9632	0.0187795	9.53826	13.9444	0.942578		3.28806	0.0187795	7.45193	3.26928	0.663283
KO:K00068	srlD; sorbitol-6-phosphate 2-dehydrogenase [EC:1.1.1.140]	67.1051	22.8945	1.55142	44.2106	0.816819		67.1051	0.112813	9.21634	66.9923	0.999728		22.8945	0.112813	7.66492	22.7816	0.975932			KO:K00299	ssuE; FMN reductase [EC:1.5.1.38]	41.0698	0.0284763	10.4941	41.0413	0.998831		41.0698	0.0187795	11.0947	41.051	0.998401		NA	NA	NA	NA	NA
KO:K00069	HPGD; 15-hydroxyprostaglandin dehydrogenase (NAD) [EC:1.1.1.141]	1.24713	10.784	-3.1122	9.53684	0.765612		1.24713	0.124498	3.32442	1.12263	0.454317		10.784	0.124498	6.43662	10.6595	0.863247			KO:K00302	soxA; sarcosine oxidase, subunit alpha [EC:1.5.3.1]	7.21529	19.178	-1.41033	11.9628	0.742501		7.21529	0.0187795	8.58576	7.19651	0.852666		19.178	0.0187795	9.99608	19.1593	0.972438
KO:K00073	allD; ureidoglycolate dehydrogenase (NAD+) [EC:1.1.1.350]	0.987043	4.35084	-2.14011	3.3638	0.56643		0.987043	0.0187795	5.71588	0.968263	0.348547		4.35084	0.0187795	7.85599	4.33206	0.721208			KO:K00311	ETFDH; electron-transferring-flavoprotein dehydrogenase [EC:1.5.5.1]	87.0562	11.6406	2.90278	75.4156	0.864774		87.0562	0.0187795	12.1786	87.0374	0.999895		11.6406	0.0187795	9.27579	11.6218	0.912298
KO:K00074	paaH, hbd, fadB, mmgB; 3-hydroxybutyryl-CoA dehydrogenase [EC:1.1.1.157]	125.855	261.141	-1.05307	135.286	0.788333		125.855	94.6842	0.410568	31.1709	0.630671		261.141	94.6842	1.46364	166.457	0.865135			KO:K00317	dmd-tmd; dimethylamine/trimethylamine dehydrogenase [EC:1.5.8.1 1.5.8.2]	20.581	0.113925	7.49708	20.4671	0.980931		20.581	0.0187795	10.0979	20.5622	0.979615		0.113925	0.0187795	2.60086	0.0951455	0.308921
KO:K00075	murB; UDP-N-acetylmuramate dehydrogenase [EC:1.3.1.98]	250.907	267.33	-0.0914706	16.4233	0.337164		250.907	116.937	1.10142	133.969	0.836295		267.33	116.937	1.19289	150.393	0.848007			KO:K00322	sthA, udhA; NAD(P) transhydrogenase [EC:1.6.1.1]	31.2157	4.70709	2.72936	26.5086	0.856437		31.2157	0.0187795	10.6989	31.1969	0.994982		4.70709	0.0187795	7.96954	4.68831	0.721208
KO:K00076	hdhA; 7-alpha-hydroxysteroid dehydrogenase [EC:1.1.1.159]	1.27676	1.7226	-0.432107	0.445847	0.2862		1.27676	0.0187795	6.08718	1.25798	0.524096		1.7226	0.0187795	6.51929	1.70382	0.482345			KO:K00347	nqrB; Na+-transporting NADH:ubiquinone oxidoreductase subunit B [EC:1.6.5.8]	12.2896	12.7436	-0.0523379	0.454026	0.2862		12.2896	0.0187795	9.35406	12.2708	0.93317		12.7436	0.0187795	9.4064	12.7248	0.924912
KO:K00077	panE, apbA; 2-dehydropantoate 2-reductase [EC:1.1.1.169]	192.16	127.141	0.595875	65.0186	0.665086		192.16	140.769	0.448975	51.3906	0.662419		127.141	140.769	-0.146899	13.6279	0.433376			KO:K00350	nqrE; Na+-transporting NADH:ubiquinone oxidoreductase subunit E [EC:1.6.5.8]	12.2249	12.1951	0.00352464	0.0298301	0.2862		12.2249	0.0187795	9.34645	12.2061	0.93317		12.1951	0.0187795	9.34293	12.1763	0.924912
KO:K00082	ribD2; 5-amino-6-(5-phosphoribosylamino)uracil reductase [EC:1.1.1.193]	58.9498	32.6913	0.85058	26.2585	0.717764		58.9498	5.53809	3.41203	53.4118	0.897439		32.6913	5.53809	2.56145	27.1532	0.889297			KO:K00351	nqrF; Na+-transporting NADH:ubiquinone oxidoreductase subunit F [EC:1.6.5.8]	19.1243	15.2201	0.329424	3.90414	0.41828		19.1243	0.0187795	9.99203	19.1055	0.976301		15.2201	0.0187795	9.66261	15.2013	0.951864
KO:K00086	dhaT; 1,3-propanediol dehydrogenase [EC:1.1.1.202]	13.0569	10.2683	0.346611	2.78857	0.390105		13.0569	4.88948	1.41706	8.16743	0.735511		10.2683	4.88948	1.07045	5.37886	0.63109			KO:K00355	NQO1; NAD(P)H dehydrogenase (quinone) [EC:1.6.5.2]	14.2293	4.42622	1.68471	9.80304	0.742618		14.2293	0.0187795	9.56549	14.2105	0.950951		4.42622	0.0187795	7.88078	4.40744	0.721208
KO:K00087	ygeS, xdhA; xanthine dehydrogenase molybdenum-binding subunit [EC:1.17.1.4]	101.162	92.7539	0.125194	8.40853	0.3664		101.162	197.945	-0.968426	96.7825	0.790247		92.7539	197.945	-1.09362	105.191	0.841899			KO:K00362	nirB; nitrite reductase (NADH) large subunit [EC:1.7.1.15]	20.0533	59.6002	-1.57148	39.5469	0.816303		20.0533	0.086423	7.85821	19.9669	0.973772		59.6002	0.086423	9.42969	59.5138	0.999461
KO:K00088	IMPDH, guaB; IMP dehydrogenase [EC:1.1.1.205]	333.043	311.397	0.0969532	21.6459	0.344176		333.043	387.415	-0.218173	54.3725	0.521785		311.397	387.415	-0.315127	76.0184	0.58272			KO:K00367	narB; ferredoxin-nitrate reductase [EC:1.7.7.2]	14.6785	5.84122	1.32936	8.83724	0.698656		14.6785	0.180757	6.34351	14.4977	0.918764		5.84122	0.180757	5.01415	5.66046	0.67041
KO:K00090	ghrB; glyoxylate/hydroxypyruvate/2-ketogluconate reductase [EC:1.1.1.79 1.1.1.81 1.1.1.215]	2.93376	0.0284763	6.68684	2.90528	0.613664		2.93376	0.0187795	7.28745	2.91498	0.624409		NA	NA	NA	NA	NA			KO:K00389	yidH; putative membrane protein	33.2067	3.23111	3.36137	29.9756	0.860995		33.2067	0.0187795	10.7881	33.188	0.995902		3.23111	0.0187795	7.42673	3.21233	0.663283
KO:K00091	E1.1.1.219; dihydroflavonol-4-reductase [EC:1.1.1.219]	103.985	120.34	-0.210738	16.3548	0.428155		103.985	65.4018	0.668979	38.5836	0.74147		120.34	65.4018	0.879716	54.9384	0.788242			KO:K00404	ccoN; cytochrome c oxidase cbb3-type subunit I [EC:1.9.3.1]	25.1649	23.9458	0.0716362	1.21903	0.306486		25.1649	0.0187795	10.388	25.1461	0.989233		23.9458	0.0187795	10.3164	23.9271	0.983763
KO:K00096	araM, egsA; glycerol-1-phosphate dehydrogenase [NAD(P)+] [EC:1.1.1.261]	65.0966	125.317	-0.944931	60.2207	0.732966		65.0966	462.865	-2.82994	397.769	0.897219		125.317	462.865	-1.88501	337.548	0.886131			KO:K00405	ccoO; cytochrome c oxidase cbb3-type subunit II	15.2545	41.667	-1.44967	26.4125	0.80858		15.2545	0.0992413	7.26408	15.1552	0.94402		41.667	0.0992413	8.71375	41.5677	0.998007
KO:K00097	pdxA; 4-hydroxythreonine-4-phosphate dehydrogenase [EC:1.1.1.262]	95.5187	115.07	-0.268661	19.5517	0.475487		95.5187	80.2596	0.251109	15.2591	0.53225		115.07	80.2596	0.51977	34.8107	0.686319			KO:K00406	ccoP; cytochrome c oxidase cbb3-type subunit III	15.0599	8.35657	0.849729	6.70333	0.585859		15.0599	0.155476	6.59788	14.9044	0.918764		8.35657	0.155476	5.74815	8.2011	0.824771
KO:K00098	idnD; L-idonate 5-dehydrogenase [EC:1.1.1.264]	2.12064	0.0284763	6.21859	2.09216	0.613664		2.12064	5.85022	-1.46399	3.72958	0.580159		0.0187795	5.85022	-8.28319	5.83144	0.766729			KO:K00426	cydB; cytochrome d ubiquinol oxidase subunit II [EC:1.10.3.14]	90.5149	12.5324	2.8525	77.9826	0.864774		90.5149	0.0187795	12.2348	90.4961	0.999906		12.5324	0.0187795	9.38229	12.5136	0.924912
KO:K00099	dxr; 1-deoxy-D-xylulose-5-phosphate reductoisomerase [EC:1.1.1.267]	195.502	221.265	-0.178594	25.7633	0.406924		195.502	56.4154	1.79302	139.087	0.876803		221.265	56.4154	1.97162	164.85	0.886307			KO:K00432	gpx; glutathione peroxidase [EC:1.11.1.9]	49.9896	0.235451	7.73005	49.7541	0.998753		49.9896	0.0187795	11.3783	49.9708	0.999289		0.235451	0.0187795	3.6482	0.216672	0.308921
KO:K00100	bdhAB; butanol dehydrogenase [EC:1.1.1.-]	43.4513	140.072	-1.68869	96.6204	0.840534		43.4513	100.104	-1.20403	56.6529	0.84101		140.072	100.104	0.484664	39.9675	0.667304			KO:K00437	hydB; [NiFe] hydrogenase large subunit [EC:1.12.2.1]	38.8443	37.9346	0.0341893	0.909718	0.2862		38.8443	0.0187795	11.0143	38.8255	0.997669		37.9346	0.0187795	10.9801	37.9158	0.99721
KO:K00101	lldD; L-lactate dehydrogenase (cytochrome) [EC:1.1.2.3]	19.4016	11.8117	0.715959	7.58991	0.584982		19.4016	0.0187795	10.0128	19.3828	0.976301		11.8117	0.0187795	9.29685	11.7929	0.912298			KO:K00449	pcaH; protocatechuate 3,4-dioxygenase, beta subunit [EC:1.13.11.3]	6.84831	13.1092	-0.936755	6.26085	0.589053		6.84831	0.0187795	8.51045	6.82953	0.826406		13.1092	0.0187795	9.4472	13.0904	0.935135
KO:K00102	LDHD, dld; D-lactate dehydrogenase (cytochrome) [EC:1.1.2.4]	93.1006	79.2806	0.231822	13.82	0.444244		93.1006	382.371	-2.03811	289.271	0.888344		79.2806	382.371	-2.26993	303.091	0.895088			KO:K00451	HGD, hmgA; homogentisate 1,2-dioxygenase [EC:1.13.11.5]	85.4852	53.1554	0.685458	32.3298	0.684038		85.4852	0.316779	8.07605	85.1684	0.998965		53.1554	0.316779	7.39059	52.8386	0.993705
KO:K00103	GULO; L-gulonolactone oxidase [EC:1.1.3.8]	2.65041	0.0284763	6.54031	2.62193	0.613664		2.65041	0.0187795	7.14091	2.63163	0.624409		NA	NA	NA	NA	NA			KO:K00452	HAAO; 3-hydroxyanthranilate 3,4-dioxygenase [EC:1.13.11.6]	3.93467	17.3462	-2.14031	13.4116	0.802045		3.93467	0.0187795	7.71094	3.91589	0.695944		17.3462	0.0187795	9.85125	17.3275	0.963669
KO:K00104	glcD; glycolate oxidase [EC:1.1.3.15]	297.239	317.483	-0.09506	20.2449	0.344176		297.239	738.606	-1.31318	441.367	0.846529		317.483	738.606	-1.21812	421.123	0.851641			KO:K00453	TDO2, kynA; tryptophan 2,3-dioxygenase [EC:1.13.11.11]	17.2046	27.8132	-0.692974	10.6086	0.623081		17.2046	0.0187795	9.83942	17.1858	0.968085		27.8132	0.0187795	10.5324	27.7944	0.990199
KO:K00108	betA, CHDH; choline dehydrogenase [EC:1.1.99.1]	2.78926	1.49315	0.90153	1.29612	0.377074		2.78926	0.0187795	7.21458	2.77049	0.624409		1.49315	0.0187795	6.31305	1.47437	0.482345			KO:K00457	HPD, hppD; 4-hydroxyphenylpyruvate dioxygenase [EC:1.13.11.27]	107.65	40.8541	1.39779	66.7956	0.812885		107.65	0.0187795	12.4849	107.631	0.999969		40.8541	0.0187795	11.0871	40.8353	0.997948
KO:K00109	L2HGDH; 2-hydroxyglutarate dehydrogenase [EC:1.1.99.2]	3.60397	8.44355	-1.22826	4.83958	0.580055		3.60397	0.23184	3.95838	3.37213	0.59977		8.44355	0.23184	5.18665	8.21171	0.761172			KO:K00463	IDO, INDO; indoleamine 2,3-dioxygenase [EC:1.13.11.52]	66.37	4.58965	3.85407	61.7803	0.865728		66.37	0.0187795	11.7872	66.3512	0.99976		4.58965	0.0187795	7.93308	4.57087	0.721208
KO:K00111	glpA, glpD; glycerol-3-phosphate dehydrogenase [EC:1.1.5.3]	190.979	228.966	-0.261718	37.9868	0.473296		190.979	127.143	0.586964	63.8362	0.729709		228.966	127.143	0.848682	101.823	0.785721			KO:K00464	diox1; all-trans-8'-apo-beta-carotenal 15,15'-oxygenase [EC:1.13.11.75]	33.3647	0.0284763	10.1943	33.3362	0.996932		33.3647	0.0187795	10.795	33.3459	0.995902		NA	NA	NA	NA	NA
KO:K00112	glpB; glycerol-3-phosphate dehydrogenase subunit B [EC:1.1.5.3]	29.9315	0.0284763	10.0377	29.903	0.995179		29.9315	0.0187795	10.6383	29.9127	0.993749		NA	NA	NA	NA	NA			KO:K00479	gbcA; glycine betaine catabolism A	13.6674	9.70471	0.493985	3.96272	0.448461		13.6674	0.0187795	9.50737	13.6487	0.942578		9.70471	0.0187795	9.01339	9.68593	0.879086
KO:K00113	glpC; glycerol-3-phosphate dehydrogenase subunit C [EC:1.1.5.3]	34.9354	22.0418	0.664449	12.8936	0.633015		34.9354	226.829	-2.69884	191.894	0.896028		22.0418	226.829	-3.36329	204.787	0.902579			KO:K00484	hpaC; flavin reductase (NADH) [EC:1.5.1.36]	10.4269	3.87851	1.42673	6.54834	0.655571		10.4269	0.0187795	9.11693	10.4081	0.908708		3.87851	0.0187795	7.6902	3.85973	0.663283
KO:K00114	exaA; alcohol dehydrogenase (cytochrome c) [EC:1.1.2.8]	5.58626	15.8163	-1.50146	10.2301	0.734534		5.58626	0.0187795	8.21658	5.56748	0.792714		15.8163	0.0187795	9.71804	15.7975	0.951864			KO:K00486	KMO; kynurenine 3-monooxygenase [EC:1.14.13.9]	3.96251	17.3462	-2.13014	13.3837	0.802045		3.96251	0.0187795	7.72111	3.94373	0.695944		17.3462	0.0187795	9.85125	17.3275	0.963669
KO:K00117	gcd; quinoprotein glucose dehydrogenase [EC:1.1.5.2]	25.3964	31.0561	-0.290253	5.65971	0.437583		25.3964	4.75847	2.41605	20.6379	0.873228		31.0561	4.75847	2.70631	26.2977	0.889871			KO:K00493	E1.14.14.1; unspecific monooxygenase [EC:1.14.14.1]	13.7735	0.346839	5.31148	13.4266	0.902425		13.7735	0.0187795	9.51852	13.7547	0.942578		0.346839	0.0187795	4.20704	0.32806	0.308921
KO:K00118	gfo; glucose-fructose oxidoreductase [EC:1.1.99.28]	5.75927	0.481966	3.57888	5.2773	0.661765		5.75927	0.0187795	8.26058	5.74049	0.792714		0.481966	0.0187795	4.6817	0.463186	0.308921			KO:K00496	alkB1_2, alkM; alkane 1-monooxygenase [EC:1.14.15.3]	10.0412	0.0284763	8.46196	10.0128	0.914784		10.0412	0.0187795	9.06257	10.0225	0.908708		NA	NA	NA	NA	NA
KO:K00121	frmA, ADH5, adhC; S-(hydroxymethyl)glutathione dehydrogenase / alcohol dehydrogenase [EC:1.1.1.284 1.1.1.1]	35.483	124.424	-1.81007	88.941	0.844069		35.483	2.61869	3.76021	32.8643	0.893498		124.424	2.61869	5.57027	121.805	0.902755			KO:K00499	CMO; choline monooxygenase [EC:1.14.15.7]	23.809	0.465278	5.67727	23.3437	0.944283		23.809	0.0187795	10.3081	23.7902	0.986159		0.465278	0.0187795	4.63086	0.446498	0.308921
KO:K00122	FDH; formate dehydrogenase [EC:1.17.1.9]	39.5716	26.9695	0.553134	12.602	0.590183		39.5716	0.0187795	11.0411	39.5528	0.99792		26.9695	0.0187795	10.488	26.9507	0.989086			KO:K00500	phhA, PAH; phenylalanine-4-hydroxylase [EC:1.14.16.1]	81.7439	35.5413	1.20161	46.2025	0.796484		81.7439	0.0187795	12.0877	81.7251	0.999843		35.5413	0.0187795	10.8861	35.5226	0.996272
KO:K00123	fdoG, fdhF; formate dehydrogenase major subunit [EC:1.17.1.9]	154.308	361.649	-1.22878	207.341	0.801286		154.308	166.025	-0.105584	11.7166	0.424598		361.649	166.025	1.1232	195.625	0.843587			KO:K00507	SCD, desC; stearoyl-CoA desaturase (Delta-9 desaturase) [EC:1.14.19.1]	58.8738	0.759484	6.27646	58.1143	0.982723		58.8738	0.0187795	11.6143	58.8551	0.999592		0.759484	0.0187795	5.33779	0.740704	0.308921
KO:K00124	fdoH; formate dehydrogenase iron-sulfur subunit	55.8167	109.231	-0.968613	53.4142	0.733687		55.8167	87.486	-0.648355	31.6693	0.737058		109.231	87.486	0.320257	21.7449	0.577292			KO:K00508	E1.14.19.3; linoleoyl-CoA desaturase [EC:1.14.19.3]	16.3857	0.0284763	9.16846	16.3572	0.966332		16.3857	0.0187795	9.76906	16.3669	0.963255		NA	NA	NA	NA	NA
KO:K00125	fdhB; formate dehydrogenase, beta subunit [EC:1.17.1.9]	22.5398	39.033	-0.79222	16.4932	0.683307		22.5398	0.0187795	10.2291	22.521	0.98411		39.033	0.0187795	11.0213	39.0142	0.997714			KO:K00510	HMOX1; heme oxygenase 1 [EC:1.14.14.18]	38.4366	0.0284763	10.3985	38.4081	0.998393		38.4366	0.0187795	10.9991	38.4178	0.997669		NA	NA	NA	NA	NA
KO:K00127	fdoI; formate dehydrogenase subunit gamma	14.8339	60.5216	-2.02855	45.6877	0.854042		14.8339	150.852	-3.34616	136.018	0.897962		60.5216	150.852	-1.31761	90.33	0.860586			KO:K00514	ZDS, crtQ; zeta-carotene desaturase [EC:1.3.5.6]	54.0074	28.6883	0.912692	25.319	0.723208		54.0074	0.0187795	11.4898	53.9886	0.999477		28.6883	0.0187795	10.5771	28.6695	0.991243
KO:K00128	ALDH; aldehyde dehydrogenase (NAD+) [EC:1.2.1.3]	473.308	287.107	0.72119	186.201	0.691644		473.308	225.937	1.06686	247.372	0.834706		287.107	225.937	0.345671	61.1705	0.597585			KO:K00517	CYP81F; indol-3-yl-methylglucosinolate hydroxylase [EC:1.14.-.-]	59.4984	30.5675	0.96085	28.9309	0.72875		59.4984	0.300632	7.62871	59.1978	0.993811		30.5675	0.300632	6.66786	30.2669	0.959508
KO:K00130	betB, gbsA; betaine-aldehyde dehydrogenase [EC:1.2.1.8]	90.6092	60.3713	0.585795	30.2379	0.661365		90.6092	89.2748	0.0214059	1.33448	0.354129		60.3713	89.2748	-0.564389	28.9035	0.694091			KO:K00518	sodN; nickel superoxide dismutase [EC:1.15.1.1]	1.05757	19.4262	-4.19917	18.3686	0.841225		1.05757	0.144978	2.86685	0.912597	0.348547		19.4262	0.144978	7.06603	19.2812	0.960047
KO:K00131	gapN; glyceraldehyde-3-phosphate dehydrogenase (NADP+) [EC:1.2.1.9]	88.6356	51.5465	0.782011	37.0891	0.708707		88.6356	0.498272	7.47481	88.1373	0.994104		51.5465	0.498272	6.6928	51.0482	0.96558			KO:K00523	ascD, ddhD, rfbI; CDP-4-dehydro-6-deoxyglucose reductase, E3 [EC:1.17.1.1]	6.41109	16.4793	-1.36201	10.0682	0.730093		6.41109	0.168983	5.24562	6.2421	0.724901		16.4793	0.168983	6.60763	16.3103	0.924877
KO:K00132	E1.2.1.10; acetaldehyde dehydrogenase (acetylating) [EC:1.2.1.10]	12.6892	14.9008	-0.231781	2.21152	0.367092		12.6892	0.0187795	9.40023	12.6705	0.93317		14.9008	0.0187795	9.63201	14.882	0.944033			KO:K00524	nrdJ; ribonucleotide reductase, class II [EC:1.17.4.1]	55.8655	0.0284763	10.938	55.837	0.999708		55.8655	0.0187795	11.5386	55.8467	0.99955		NA	NA	NA	NA	NA
KO:K00133	asd; aspartate-semialdehyde dehydrogenase [EC:1.2.1.11]	287.448	274.017	0.0690379	13.4314	0.321455		287.448	320.045	-0.154973	32.5968	0.462419		274.017	320.045	-0.224011	46.0283	0.502556			KO:K00527	rtpR; ribonucleoside-triphosphate reductase (thioredoxin) [EC:1.17.4.2]	30.1378	117.974	-1.96883	87.8365	0.844936		30.1378	4.96975	2.60033	25.168	0.885166		117.974	4.96975	4.56916	113.005	0.902743
KO:K00134	GAPDH, gapA; glyceraldehyde 3-phosphate dehydrogenase [EC:1.2.1.12]	370.763	328.788	0.173341	41.9754	0.400097		370.763	130.252	1.50919	240.511	0.858196		328.788	130.252	1.33585	198.536	0.86068			KO:K00529	hcaD; 3-phenylpropionate/trans-cinnamate dioxygenase ferredoxin reductase component [EC:1.18.1.3]	4.60693	14.5438	-1.65852	9.93685	0.742618		4.60693	0.0187795	7.93851	4.58815	0.749843		14.5438	0.0187795	9.59703	14.525	0.944033
KO:K00135	gabD; succinate-semialdehyde dehydrogenase / glutarate-semialdehyde dehydrogenase [EC:1.2.1.16 1.2.1.79 1.2.1.20]	285.167	183.064	0.639459	102.103	0.673413		285.167	130.546	1.12725	154.621	0.837299		183.064	130.546	0.487788	52.5178	0.67728			KO:K00557	trmA; tRNA (uracil-5-)-methyltransferase [EC:2.1.1.35]	12.4741	6.41904	0.958505	6.05505	0.589053		12.4741	0.0187795	9.37556	12.4553	0.93317		6.41904	0.0187795	8.41706	6.40026	0.803623
KO:K00137	prr; aminobutyraldehyde dehydrogenase [EC:1.2.1.19]	0.105005	0.0284763	1.88262	0.0765286	0.2862		0.105005	0.0187795	2.48323	0.0862254	0.348547		NA	NA	NA	NA	NA			KO:K00587	ICMT, STE14; protein-S-isoprenylcysteine O-methyltransferase [EC:2.1.1.100]	10.2208	0.104881	6.60661	10.1159	0.89777		10.2208	0.0187795	9.08814	10.202	0.908708		0.104881	0.0187795	2.48153	0.0861018	0.308921
KO:K00138	aldB; aldehyde dehydrogenase [EC:1.2.1.-]	2.56573	0.086468	4.89106	2.47926	0.496611		2.56573	0.0187795	7.09407	2.54695	0.624409		0.086468	0.0187795	2.20301	0.0676886	0.308921			KO:K00588	E2.1.1.104; caffeoyl-CoA O-methyltransferase [EC:2.1.1.104]	48.9499	49.2173	-0.00786141	0.267461	0.2862		48.9499	1.8427	4.73141	47.1072	0.89723		49.2173	1.8427	4.73927	47.3746	0.901653
KO:K00140	mmsA, iolA, ALDH6A1; malonate-semialdehyde dehydrogenase (acetylating) / methylmalonate-semialdehyde dehydrogenase [EC:1.2.1.18 1.2.1.27]	75.5821	101.72	-0.428492	26.1383	0.579256		75.5821	304.69	-2.01122	229.107	0.888344		101.72	304.69	-1.58273	202.969	0.882016			KO:K00591	COQ3; polyprenyldihydroxybenzoate methyltransferase / 3-demethylubiquinol 3-O-methyltransferase [EC:2.1.1.114 2.1.1.64]	0.0284763	11.1012	-8.60674	11.0728	0.927269		0.0187795	19.5957	-10.0272	19.577	0.976301		11.1012	19.5957	-0.819818	8.4945	0.659871
KO:K00141	xylC; benzaldehyde dehydrogenase (NAD) [EC:1.2.1.28]	0.0284763	0.678299	-4.57409	0.649823	0.2862		NA	NA	NA	NA	NA		0.678299	0.0187795	5.17469	0.65952	0.308921			KO:K00598	tam; trans-aconitate 2-methyltransferase [EC:2.1.1.144]	27.5531	0.0284763	9.91824	27.5247	0.993592		27.5531	0.0187795	10.5188	27.5344	0.991846		NA	NA	NA	NA	NA
KO:K00145	argC; N-acetyl-gamma-glutamyl-phosphate reductase [EC:1.2.1.38]	225.784	155.319	0.539712	70.4653	0.624766		225.784	168.007	0.42642	57.7768	0.655154		155.319	168.007	-0.113292	12.6885	0.394291			KO:K00625	E2.3.1.8, pta; phosphate acetyltransferase [EC:2.3.1.8]	46.7525	39.7082	0.235608	7.04434	0.433853		46.7525	0.469252	6.63854	46.2833	0.966904		39.7082	0.469252	6.40293	39.2389	0.96408
KO:K00146	feaB; phenylacetaldehyde dehydrogenase [EC:1.2.1.39]	73.0665	37.6125	0.957997	35.454	0.731691		73.0665	0.0187795	11.9258	73.0477	0.999812		37.6125	0.0187795	10.9678	37.5938	0.99721			KO:K00634	ptb; phosphate butyryltransferase [EC:2.3.1.19]	33.6421	94.4455	-1.48921	60.8034	0.817141		33.6421	0.0981909	8.42046	33.5439	0.995442		94.4455	0.0981909	9.90968	94.3473	0.999941
KO:K00147	proA; glutamate-5-semialdehyde dehydrogenase [EC:1.2.1.41]	145.578	113.982	0.352983	31.5957	0.529256		145.578	75.9365	0.938925	69.6413	0.789295		113.982	75.9365	0.585942	38.0456	0.728066			KO:K00641	metX; homoserine O-acetyltransferase [EC:2.3.1.31]	160.37	33.1052	2.27627	127.265	0.855989		160.37	0.0187795	13.06	160.351	1		33.1052	0.0187795	10.7837	33.0864	0.995252
KO:K00150	gap2; glyceraldehyde-3-phosphate dehydrogenase (NAD(P)) [EC:1.2.1.59]	70.5279	95.7512	-0.441096	25.2233	0.582197		70.5279	558.845	-2.98618	488.317	0.89723		95.7512	558.845	-2.54509	463.094	0.899097			KO:K00656	E2.3.1.54, pflD; formate C-acetyltransferase [EC:2.3.1.54]	54.5459	78.5906	-0.526886	24.0447	0.61681		54.5459	0.0187795	11.5041	54.5271	0.999519		78.5906	0.0187795	12.031	78.5718	0.999836
KO:K00151	hpaE, hpcC; 5-carboxymethyl-2-hydroxymuconic-semialdehyde dehydrogenase [EC:1.2.1.60]	15.0044	20.1928	-0.428455	5.1884	0.486862		15.0044	53.8726	-1.84417	38.8682	0.876626		20.1928	53.8726	-1.41571	33.6798	0.859508			KO:K00663	aacA; aminoglycoside 6'-N-acetyltransferase [EC:2.3.1.82]	10.3955	0.0284763	8.51198	10.367	0.914784		10.3955	0.0187795	9.11259	10.3767	0.908708		NA	NA	NA	NA	NA
KO:K00153	E1.1.1.306; S-(hydroxymethyl)mycothiol dehydrogenase [EC:1.1.1.306]	0.0804166	0.0284763	1.49773	0.0519403	0.2862		0.0804166	13.7106	-7.41358	13.6302	0.936787		0.0187795	13.7106	-9.51192	13.6918	0.935135			KO:K00672	ftr; formylmethanofuran--tetrahydromethanopterin N-formyltransferase [EC:2.3.1.101]	3.54923	23.7079	-2.73979	20.1587	0.845939		3.54923	0.377483	3.23302	3.17174	0.59977		23.7079	0.377483	5.97281	23.3304	0.950129
KO:K00154	E1.2.1.68; coniferyl-aldehyde dehydrogenase [EC:1.2.1.68]	0.451756	0.719693	-0.671837	0.267937	0.2862		0.451756	0.0187795	4.58832	0.432977	0.348547		0.719693	0.0187795	5.26015	0.700913	0.308921			KO:K00674	dapD; 2,3,4,5-tetrahydropyridine-2,6-dicarboxylate N-succinyltransferase [EC:2.3.1.117]	99.2008	46.5007	1.0931	52.7001	0.789326		99.2008	0.0187795	12.367	99.182	0.999948		46.5007	0.0187795	11.2739	46.4819	0.998781
KO:K00156	poxB; pyruvate dehydrogenase (quinone) [EC:1.2.5.1]	0.0284763	0.520005	-4.19069	0.491529	0.2862		NA	NA	NA	NA	NA		0.520005	0.0187795	4.7913	0.501225	0.308921			KO:K00683	QPCT; glutaminyl-peptide cyclotransferase [EC:2.3.2.5]	21.2757	6.80621	1.64428	14.4695	0.794692		21.2757	0.0187795	10.1458	21.2569	0.982218		6.80621	0.0187795	8.50155	6.78743	0.803623
KO:K00158	E1.2.3.3, poxL; pyruvate oxidase [EC:1.2.3.3]	2.84004	4.19668	-0.563338	1.35664	0.361034		2.84004	0.0187795	7.24061	2.82126	0.624409		4.19668	0.0187795	7.80395	4.1779	0.721208			KO:K00684	aat; leucyl/phenylalanyl-tRNA---protein transferase [EC:2.3.2.6]	100.268	23.2245	2.11014	77.0432	0.854928		100.268	0.0187795	12.3824	100.249	0.999948		23.2245	0.0187795	10.2723	23.2057	0.983763
KO:K00161	PDHA, pdhA; pyruvate dehydrogenase E1 component alpha subunit [EC:1.2.4.1]	377.384	311.504	0.276779	65.8792	0.48319		377.384	711.957	-0.915759	334.574	0.788344		311.504	711.957	-1.19254	400.453	0.848007			KO:K00690	E2.4.1.7; sucrose phosphorylase [EC:2.4.1.7]	30.2958	3.68549	3.03919	26.6103	0.858171		30.2958	0.0187795	10.6557	30.277	0.994428		3.68549	0.0187795	7.61656	3.66671	0.663283
KO:K00162	PDHB, pdhB; pyruvate dehydrogenase E1 component beta subunit [EC:1.2.4.1]	317.617	238.155	0.415388	79.4623	0.57875		317.617	316.377	0.00564675	1.24074	0.350115		238.155	316.377	-0.409741	78.2215	0.62524			KO:K00697	otsA; trehalose 6-phosphate synthase [EC:2.4.1.15]	30.0009	14.1226	1.087	15.8783	0.752483		30.0009	0.0187795	10.6416	29.9821	0.993749		14.1226	0.0187795	9.55463	14.1038	0.944033
KO:K00163	aceE; pyruvate dehydrogenase E1 component [EC:1.2.4.1]	82.1492	11.8453	2.79393	70.3038	0.863674		82.1492	0.0187795	12.0949	82.1304	0.999854		11.8453	0.0187795	9.30095	11.8266	0.912298			KO:K00701	cgt; cyclomaltodextrin glucanotransferase [EC:2.4.1.19]	17.5453	0.250275	6.13142	17.295	0.954412		17.5453	0.0187795	9.86771	17.5265	0.968085		0.250275	0.0187795	3.73629	0.231495	0.308921
KO:K00164	OGDH, sucA; 2-oxoglutarate dehydrogenase E1 component [EC:1.2.4.2]	79.1274	37.7926	1.06607	41.3348	0.787778		79.1274	0.0187795	12.0408	79.1086	0.999843		37.7926	0.0187795	10.9747	37.7738	0.99721			KO:K00702	E2.4.1.20; cellobiose phosphorylase [EC:2.4.1.20]	27.9463	6.66958	2.06699	21.2768	0.839638		27.9463	0.0187795	10.5393	27.9276	0.991846		6.66958	0.0187795	8.47229	6.6508	0.803623
KO:K00166	BCKDHA, bkdA1; 2-oxoisovalerate dehydrogenase E1 component alpha subunit [EC:1.2.4.4]	80.9608	76.4562	0.0825898	4.50459	0.327376		80.9608	37.8087	1.09851	43.1522	0.835062		76.4562	37.8087	1.01592	38.6476	0.837233			KO:K00720	UGCG; ceramide glucosyltransferase [EC:2.4.1.80]	38.486	20.3947	0.916138	18.0913	0.709233		38.486	0.0187795	11.001	38.4672	0.997669		20.3947	0.0187795	10.0848	20.3759	0.975733
KO:K00167	BCKDHB, bkdA2; 2-oxoisovalerate dehydrogenase E1 component beta subunit [EC:1.2.4.4]	172.151	126.818	0.440919	45.3335	0.584612		172.151	667.615	-1.95534	495.464	0.879542		126.818	667.615	-2.39626	540.797	0.898828			KO:K00758	deoA, TYMP; thymidine phosphorylase [EC:2.4.2.4]	34.9981	29.0431	0.26908	5.95498	0.43135		34.9981	0.0187795	10.8639	34.9793	0.996477		29.0431	0.0187795	10.5948	29.0244	0.992333
KO:K00169	porA; pyruvate ferredoxin oxidoreductase alpha subunit [EC:1.2.7.1]	85.4334	266.484	-1.64117	181.05	0.840203		85.4334	232.722	-1.44574	147.289	0.856795		266.484	232.722	0.195439	33.7615	0.480305			KO:K00783	rlmH; 23S rRNA (pseudouridine1915-N3)-methyltransferase [EC:2.1.1.177]	25.0718	30.8828	-0.300737	5.81099	0.440699		25.0718	0.205005	6.93427	24.8668	0.974451		30.8828	0.205005	7.23501	30.6778	0.98075
KO:K00170	porB; pyruvate ferredoxin oxidoreductase beta subunit [EC:1.2.7.1]	87.1931	355.37	-2.02704	268.177	0.854899		87.1931	236.319	-1.43845	149.126	0.856774		355.37	236.319	0.588582	119.05	0.730117			KO:K00799	GST, gst; glutathione S-transferase [EC:2.5.1.18]	59.6726	4.12019	3.85629	55.5524	0.865621		59.6726	0.0187795	11.6337	59.6539	0.999603		4.12019	0.0187795	7.77741	4.10141	0.721208
KO:K00171	porD; pyruvate ferredoxin oxidoreductase delta subunit [EC:1.2.7.1]	37.9622	152.949	-2.01042	114.987	0.854899		37.9622	154.08	-2.02104	116.118	0.888334		152.949	154.08	-0.0106242	1.1305	0.310363			KO:K00801	FDFT1; farnesyl-diphosphate farnesyltransferase [EC:2.5.1.21]	13.2882	0.0284763	8.86616	13.2597	0.94663		13.2882	0.0187795	9.46677	13.2694	0.942578		NA	NA	NA	NA	NA
KO:K00172	porG; pyruvate ferredoxin oxidoreductase gamma subunit [EC:1.2.7.1]	81.2853	301.303	-1.89015	220.017	0.844721		81.2853	233.815	-1.5243	152.53	0.858238		301.303	233.815	0.365846	67.4877	0.608851			KO:K00804	GGPS1; geranylgeranyl diphosphate synthase, type III [EC:2.5.1.1 2.5.1.10 2.5.1.29]	0.812112	38.3842	-5.56269	37.5721	0.953993		0.812112	306.892	-8.56184	306.08	0.999791		38.3842	306.892	-2.99915	268.508	0.902169
KO:K00174	korA, oorA, oforA; 2-oxoglutarate/2-oxoacid ferredoxin oxidoreductase subunit alpha [EC:1.2.7.3 1.2.7.11]	311.746	708.682	-1.18477	396.936	0.796338		311.746	880.565	-1.49806	568.819	0.858102		708.682	880.565	-0.313292	171.884	0.567351			KO:K00805	hepST; heptaprenyl diphosphate synthase [EC:2.5.1.30]	81.6002	38.1349	1.09746	43.4653	0.789423		81.6002	0.312364	8.0292	81.2879	0.997313		38.1349	0.312364	6.93174	37.8226	0.984818
KO:K00175	korB, oorB, oforB; 2-oxoglutarate/2-oxoacid ferredoxin oxidoreductase subunit beta [EC:1.2.7.3 1.2.7.11]	266.53	616.223	-1.20915	349.693	0.797332		266.53	887.849	-1.73602	621.319	0.876636		616.223	887.849	-0.526863	271.627	0.692825			KO:K00831	serC, PSAT1; phosphoserine aminotransferase [EC:2.6.1.52]	128.589	32.4565	1.98618	96.132	0.844975		128.589	0.0187795	12.7413	128.57	1		32.4565	0.0187795	10.7551	32.4378	0.994689
KO:K00176	korD, oorD; 2-oxoglutarate ferredoxin oxidoreductase subunit delta [EC:1.2.7.3]	89.7791	186.054	-1.05127	96.2747	0.788333		89.7791	113.606	-0.339586	23.8268	0.598286		186.054	113.606	0.711682	72.4479	0.755029			KO:K00835	avtA; valine--pyruvate aminotransferase [EC:2.6.1.66]	34.58	0.0284763	10.246	34.5515	0.997302		34.58	0.0187795	10.8466	34.5612	0.996477		NA	NA	NA	NA	NA
KO:K00177	korC, oorC; 2-oxoglutarate ferredoxin oxidoreductase subunit gamma [EC:1.2.7.3]	87.6368	189.779	-1.11471	102.142	0.790543		87.6368	140.955	-0.685626	53.3182	0.748923		189.779	140.955	0.429082	48.8236	0.649918			KO:K00836	ectB, dat; diaminobutyrate-2-oxoglutarate transaminase [EC:2.6.1.76]	0.0956889	3.28591	-5.1018	3.19022	0.56643		0.0956889	194.668	-10.9904	194.573	1		3.28591	194.668	-5.88858	191.382	0.966366
KO:K00179	iorA; indolepyruvate ferredoxin oxidoreductase, alpha subunit [EC:1.2.7.8]	66.7493	233.209	-1.8048	166.46	0.84179		66.7493	377.802	-2.50081	311.053	0.893791		233.209	377.802	-0.696006	144.593	0.753822			KO:K00855	PRK, prkB; phosphoribulokinase [EC:2.7.1.19]	61.3435	18.243	1.74956	43.1005	0.840641		61.3435	0.126344	8.92341	61.2172	0.999592		18.243	0.126344	7.17385	18.1167	0.955991
KO:K00180	iorB; indolepyruvate ferredoxin oxidoreductase, beta subunit [EC:1.2.7.8]	51.5441	110.224	-1.09656	58.6797	0.790203		51.5441	210.562	-2.03036	159.017	0.888344		110.224	210.562	-0.933807	100.338	0.793599			KO:K00856	E2.7.1.20, ADK; adenosine kinase [EC:2.7.1.20]	65.0708	4.58681	3.82645	60.484	0.865719		65.0708	0.38131	7.4149	64.6895	0.993937		4.58681	0.38131	3.58845	4.2055	0.626331
KO:K00183	K00183; prokaryotic molybdopterin-containing oxidoreductase family, molybdopterin binding subunit	0.87987	4.58876	-2.38274	3.70889	0.56643		0.87987	0.0187795	5.55006	0.86109	0.348547		4.58876	0.0187795	7.9328	4.56998	0.721208			KO:K00857	tdk, TK; thymidine kinase [EC:2.7.1.21]	134.131	104.767	0.356459	29.3641	0.537369		134.131	15.8426	3.08177	118.289	0.897596		104.767	15.8426	2.72531	88.9248	0.900715
KO:K00184	K00184; prokaryotic molybdopterin-containing oxidoreductase family, iron-sulfur binding subunit	376.882	308.221	0.29015	68.6616	0.48992		376.882	240.476	0.648223	136.407	0.741355		308.221	240.476	0.358073	67.745	0.605123			KO:K00863	DAK, TKFC; triose/dihydroxyacetone kinase / FAD-AMP lyase (cyclizing) [EC:2.7.1.28 2.7.1.29 4.6.1.15]	15.5056	0.0284763	9.08881	15.4772	0.960742		15.5056	0.0187795	9.68942	15.4868	0.957359		NA	NA	NA	NA	NA
KO:K00185	K00185; prokaryotic molybdopterin-containing oxidoreductase family, membrane subunit	240.768	222.685	0.112641	18.0833	0.351227		240.768	197.337	0.286987	43.4318	0.569015		222.685	197.337	0.174347	25.3485	0.453353			KO:K00870	E2.7.1.37; protein kinase [EC:2.7.1.37]	41.8416	0.0284763	10.521	41.8131	0.998831		41.8416	0.0187795	11.1216	41.8228	0.998401		NA	NA	NA	NA	NA
KO:K00186	vorA; 2-oxoisovalerate ferredoxin oxidoreductase, alpha subunit [EC:1.2.7.7]	7.32812	44.9416	-2.61654	37.6134	0.861882		7.32812	0.0187795	8.60814	7.30934	0.852666		44.9416	0.0187795	11.2247	44.9228	0.998581			KO:K00875	E2.7.1.47; D-ribulokinase [EC:2.7.1.47]	41.6253	18.8019	1.14658	22.8234	0.781058		41.6253	0.0187795	11.1141	41.6065	0.998401		18.8019	0.0187795	9.96751	18.7831	0.968382
KO:K00187	vorB; 2-oxoisovalerate ferredoxin oxidoreductase, beta subunit [EC:1.2.7.7]	18.7685	57.0745	-1.60453	38.306	0.838537		18.7685	0.14566	7.00956	18.6228	0.959074		57.0745	0.14566	8.61409	56.9288	0.999226			KO:K00876	udk, UCK; uridine kinase [EC:2.7.1.48]	70.2424	109.728	-0.643515	39.4854	0.67237		70.2424	16.3327	2.10458	53.9097	0.887842		109.728	16.3327	2.74809	93.3951	0.900739
KO:K00188	vorD; 2-oxoisovalerate ferredoxin oxidoreductase, delta subunit [EC:1.2.7.7]	0.727165	0.522222	0.47762	0.204943	0.2862		0.727165	0.0187795	5.27505	0.708385	0.348547		0.522222	0.0187795	4.79743	0.503442	0.308921			KO:K00884	NAGK, nagK; N-acetylglucosamine kinase [EC:2.7.1.59]	37.8835	24.9625	0.601805	12.921	0.623705		37.8835	0.251145	7.23691	37.6323	0.984069		24.9625	0.251145	6.6351	24.7114	0.952169
KO:K00189	vorG; 2-oxoisovalerate ferredoxin oxidoreductase, gamma subunit [EC:1.2.7.7]	10.3847	18.5298	-0.835384	8.14506	0.621747		10.3847	0.0187795	9.11109	10.3659	0.908708		18.5298	0.0187795	9.94647	18.511	0.968382			KO:K00899	mtnK; 5-methylthioribose kinase [EC:2.7.1.100]	24.0012	0.179293	7.06464	23.8219	0.981535		24.0012	0.666976	5.16933	23.3342	0.884194		0.179293	0.666976	-1.89532	0.487683	0.308921
KO:K00192	cdhA; acetyl-CoA decarbonylase/synthase complex subunit alpha [EC:1.2.7.4]	1.57862	25.8231	-4.03192	24.2444	0.856106		1.57862	0.124498	3.66447	1.45413	0.454317		25.8231	0.124498	7.69639	25.6986	0.982145			KO:K00924	E2.7.1.-; kinase [EC:2.7.1.-]	196.712	56.2419	1.80637	140.47	0.844108		196.712	4.11381	5.57947	192.598	0.898035		56.2419	4.11381	3.7731	52.1281	0.901981
KO:K00193	cdhC; acetyl-CoA decarbonylase/synthase complex subunit beta [EC:2.3.1.-]	0.533475	15.3344	-4.8452	14.8009	0.819848		0.533475	0.430999	0.307736	0.102476	0.348547		15.3344	0.430999	5.15294	14.9034	0.846811			KO:K00925	ackA; acetate kinase [EC:2.7.2.1]	97.6068	43.0342	1.1815	54.5726	0.796007		97.6068	0.498028	7.61461	97.1088	0.994156		43.0342	0.498028	6.43311	42.5362	0.964713
KO:K00194	cdhD, acsD; acetyl-CoA decarbonylase/synthase complex subunit delta [EC:2.1.1.245]	32.8243	68.5501	-1.0624	35.7258	0.786336		32.8243	0.108226	8.24457	32.716	0.994543		68.5501	0.108226	9.30697	68.4419	0.99966			KO:K00929	buk; butyrate kinase [EC:2.7.2.7]	9.82068	31.2352	-1.66928	21.4145	0.825088		9.82068	0.24	5.35472	9.58068	0.791146		31.2352	0.24	7.02399	30.9952	0.981547
KO:K00195	cdhB; acetyl-CoA decarbonylase/synthase complex subunit epsilon	0.567218	12.8545	-4.50223	12.2873	0.803253		0.567218	0.0187795	4.91668	0.548439	0.348547		12.8545	0.0187795	9.4189	12.8357	0.924912			KO:K00937	ppk; polyphosphate kinase [EC:2.7.4.1]	135.327	10.8928	3.635	124.434	0.865904		135.327	0.0187795	12.815	135.308	1		10.8928	0.0187795	9.18	10.874	0.89687
KO:K00196	cooF; anaerobic carbon-monoxide dehydrogenase iron sulfur subunit	29.366	56.8811	-0.953804	27.5151	0.727756		29.366	0.0187795	10.6108	29.3472	0.993749		56.8811	0.0187795	11.5646	56.8624	0.999379			KO:K00980	tagD; glycerol-3-phosphate cytidylyltransferase [EC:2.7.7.39]	27.7908	7.20041	1.94846	20.5904	0.827201		27.7908	0.0187795	10.5312	27.772	0.991846		7.20041	0.0187795	8.58278	7.18163	0.833798
KO:K00197	cdhE, acsC; acetyl-CoA decarbonylase/synthase complex subunit gamma [EC:2.1.1.245]	52.2266	91.0028	-0.801127	38.7762	0.710489		52.2266	0.18551	8.13714	52.0411	0.998526		91.0028	0.18551	8.93827	90.8173	0.999894			KO:K00983	neuA; N-acylneuraminate cytidylyltransferase [EC:2.7.7.43]	14.3937	3.16413	2.18555	11.2295	0.78358		14.3937	0.0187795	9.58206	14.3749	0.950951		3.16413	0.0187795	7.39651	3.14535	0.663283
KO:K00198	cooS, acsA; anaerobic carbon-monoxide dehydrogenase catalytic subunit [EC:1.2.7.4]	50.6499	112.246	-1.14803	61.5963	0.793767		50.6499	0.168864	8.22855	50.481	0.998453		112.246	0.168864	9.37659	112.077	0.999965			KO:K00984	aadA; streptomycin 3"-adenylyltransferase [EC:2.7.7.47]	23.278	0.0284763	9.67499	23.2495	0.988498		23.278	0.0187795	10.2756	23.2592	0.986159		NA	NA	NA	NA	NA
KO:K00200	fwdA, fmdA; formylmethanofuran dehydrogenase subunit A [EC:1.2.7.12]	4.48062	17.4073	-1.95792	12.9267	0.782723		4.48062	0.0187795	7.8984	4.46184	0.749843		17.4073	0.0187795	9.85632	17.3885	0.963669			KO:K00986	E2.7.7.49; RNA-directed DNA polymerase [EC:2.7.7.49]	66.4534	1.52211	5.44819	64.9313	0.955629		66.4534	0.466606	7.15399	65.9868	0.98641		1.52211	0.466606	1.7058	1.05551	0.418746
KO:K00201	fwdB, fmdB; formylmethanofuran dehydrogenase subunit B [EC:1.2.7.12]	5.5625	27.9782	-2.3305	22.4157	0.847244		5.5625	0.123703	5.49078	5.43879	0.691668		27.9782	0.123703	7.82128	27.8545	0.987843			KO:K01026	pct; propionate CoA-transferase [EC:2.8.3.1]	3.85189	1.11427	1.78946	2.73762	0.496611		3.85189	76.3302	-4.30862	72.4784	0.897826		1.11427	76.3302	-6.09808	75.216	0.96619
KO:K00202	fwdC, fmdC; formylmethanofuran dehydrogenase subunit C [EC:1.2.7.12]	3.38238	15.0718	-2.15574	11.6895	0.782898		3.38238	0.0187795	7.49274	3.3636	0.695944		15.0718	0.0187795	9.64848	15.0531	0.951864			KO:K01028	E2.8.3.5A, scoA; 3-oxoacid CoA-transferase subunit A [EC:2.8.3.5]	30.85	36.9023	-0.258439	6.05227	0.441235		30.85	0.0187795	10.6819	30.8312	0.994428		36.9023	0.0187795	10.9403	36.8835	0.996753
KO:K00203	fwdD, fmdD; formylmethanofuran dehydrogenase subunit D [EC:1.2.7.12]	1.1687	11.2488	-3.2668	10.0801	0.780541		1.1687	0.0187795	5.9596	1.14992	0.524096		11.2488	0.0187795	9.2264	11.23	0.912298			KO:K01046	lip, TGL2; triacylglycerol lipase [EC:3.1.1.3]	8.93296	18.7863	-1.07247	9.85335	0.697273		8.93296	0.0187795	8.89384	8.91418	0.87488		18.7863	0.0187795	9.96631	18.7675	0.968382
KO:K00205	fwdF, fmdF; 4Fe-4S ferredoxin	4.95791	4.75238	0.0610814	0.205528	0.2862		4.95791	0.0187795	8.04443	4.93913	0.749843		4.75238	0.0187795	7.98335	4.7336	0.721208			KO:K01051	E3.1.1.11; pectinesterase [EC:3.1.1.11]	3.11039	4.09654	-0.397311	0.986152	0.2862		3.11039	42.9243	-3.78663	39.8139	0.895954		4.09654	42.9243	-3.38932	38.8277	0.900035
KO:K00208	fabI; enoyl-[acyl-carrier protein] reductase I [EC:1.3.1.9 1.3.1.10]	175.675	135.902	0.370335	39.7722	0.541605		175.675	75.2602	1.22295	100.414	0.844784		135.902	75.2602	0.852613	60.6422	0.785275			KO:K01053	E3.1.1.17, gnl, RGN; gluconolactonase [EC:3.1.1.17]	48.9478	17.655	1.47117	31.2928	0.81307		48.9478	0.515856	6.56813	48.4319	0.96706		17.655	0.515856	5.09696	17.1391	0.866436
KO:K00209	fabV, ter; enoyl-[acyl-carrier protein] reductase / trans-2-enoyl-CoA reductase (NAD+) [EC:1.3.1.9 1.3.1.44]	0.138175	0.0284763	2.27867	0.109699	0.2862		0.138175	0.0187795	2.87927	0.119396	0.348547		NA	NA	NA	NA	NA			KO:K01060	cah; cephalosporin-C deacetylase [EC:3.1.1.41]	102.72	35.4467	1.535	67.2736	0.817628		102.72	0.0187795	12.4173	102.702	0.999948		35.4467	0.0187795	10.8823	35.4279	0.996272
KO:K00210	E1.3.1.12; prephenate dehydrogenase [EC:1.3.1.12]	4.41501	3.51606	0.328456	0.898947	0.2862		4.41501	0.0187795	7.87712	4.39623	0.749843		3.51606	0.0187795	7.54866	3.49728	0.663283			KO:K01066	aes; acetyl esterase [EC:3.1.1.-]	3.32836	22.8568	-2.77974	19.5284	0.842929		3.32836	0.167315	4.31417	3.16104	0.59977		22.8568	0.167315	7.09391	22.6894	0.969097
KO:K00214	BLVRA, bvdR; biliverdin reductase [EC:1.3.1.24]	44.8592	0.0284763	10.6214	44.8307	0.999055		44.8592	0.0187795	11.222	44.8404	0.998902		NA	NA	NA	NA	NA			KO:K01071	MCH; medium-chain acyl-[acyl-carrier-protein] hydrolase [EC:3.1.2.21]	11.3747	1.97559	2.52548	9.39915	0.761346		11.3747	0.0187795	9.24246	11.356	0.921984		1.97559	0.0187795	6.71698	1.95681	0.482345
KO:K00215	dapB; 4-hydroxy-tetrahydrodipicolinate reductase [EC:1.17.1.8]	180.314	238.369	-0.402681	58.0544	0.55412		180.314	299.44	-0.73175	119.125	0.754035		238.369	299.44	-0.32907	61.0708	0.58612			KO:K01077	E3.1.3.1, phoA, phoB; alkaline phosphatase [EC:3.1.3.1]	166.979	51.2944	1.70279	115.684	0.840914		166.979	0.143115	10.1883	166.836	1		51.2944	0.143115	8.48549	51.1513	0.998851
KO:K00216	entA; 2,3-dihydro-2,3-dihydroxybenzoate dehydrogenase [EC:1.3.1.28]	0.0906914	0.0284763	1.6712	0.0622151	0.2862		0.0906914	0.0187795	2.27181	0.071912	0.348547		NA	NA	NA	NA	NA			KO:K01078	PHO; acid phosphatase [EC:3.1.3.2]	2.37507	22.0089	-3.21204	19.6338	0.844838		2.37507	0.0187795	6.98267	2.35629	0.624409		22.0089	0.0187795	10.1947	21.9901	0.978781
KO:K00218	por; protochlorophyllide reductase [EC:1.3.1.33]	43.8925	0.0284763	10.59	43.8641	0.998958		43.8925	0.0187795	11.1906	43.8737	0.998766		NA	NA	NA	NA	NA			KO:K01081	E3.1.3.5; 5'-nucleotidase [EC:3.1.3.5]	135.409	145.012	-0.098853	9.60344	0.343621		135.409	24.0912	2.49074	111.318	0.89377		145.012	24.0912	2.5896	120.921	0.900668
KO:K00219	fadH; 2,4-dienoyl-CoA reductase (NADPH2) [EC:1.3.1.34]	4.55845	40.31	-3.14452	35.7515	0.863099		4.55845	11.3344	-1.3141	6.77597	0.682542		40.31	11.3344	1.83043	28.9755	0.876964			KO:K01082	cysQ, MET22, BPNT1; 3'(2'), 5'-bisphosphate nucleotidase [EC:3.1.3.7]	50.252	6.36478	2.981	43.8873	0.86381		50.252	0.0187795	11.3858	50.2333	0.999373		6.36478	0.0187795	8.40481	6.346	0.803623
KO:K00220	tyrC; cyclohexadieny/prephenate dehydrogenase [EC:1.3.1.43 1.3.1.12]	3.46451	1.92259	0.849599	1.54192	0.377074		3.46451	0.0187795	7.52735	3.44573	0.695944		1.92259	0.0187795	6.67775	1.90381	0.482345			KO:K01083	E3.1.3.8; 3-phytase [EC:3.1.3.8]	47.6574	20.0813	1.24684	27.5761	0.795247		47.6574	0.0187795	11.3093	47.6386	0.999195		20.0813	0.0187795	10.0625	20.0626	0.975733
KO:K00221	E4.99.1.2; alkylmercury lyase [EC:4.99.1.2]	1.59872	14.9039	-3.2207	13.3052	0.81233		1.59872	11.6625	-2.86689	10.0638	0.806063		14.9039	11.6625	0.353814	3.24141	0.451583			KO:K01119	cpdB; 2',3'-cyclic-nucleotide 2'-phosphodiesterase / 3'-nucleotidase [EC:3.1.4.16 3.1.3.6]	61.3477	34.0446	0.849583	27.3031	0.718533		61.3477	0.231911	8.04729	61.1158	0.997136		34.0446	0.231911	7.19771	33.8127	0.98286
KO:K00226	pyrD; dihydroorotate dehydrogenase (fumarate) [EC:1.3.98.1]	100.996	46.2043	1.1282	54.7917	0.791654		100.996	30.0437	1.74916	70.9523	0.876437		46.2043	30.0437	0.620964	16.1606	0.702356			KO:K01130	E3.1.6.1, aslA; arylsulfatase [EC:3.1.6.1]	14.5736	9.49936	0.617456	5.07425	0.533765		14.5736	0.0187795	9.59999	14.5548	0.950951		9.49936	0.0187795	8.98253	9.48058	0.879086
KO:K00228	CPOX, hemF; coproporphyrinogen III oxidase [EC:1.3.3.3]	48.1116	2.723	4.14312	45.3886	0.865056		48.1116	0.0187795	11.323	48.0929	0.999247		2.723	0.0187795	7.1799	2.70422	0.588898			KO:K01134	ARSA; arylsulfatase A [EC:3.1.6.8]	12.0603	10.0717	0.259961	1.98861	0.343377		12.0603	0.0187795	9.32689	12.0415	0.93317		10.0717	0.0187795	9.06693	10.0529	0.89687
KO:K00230	hemG; menaquinone-dependent protoporphyrinogen oxidase [EC:1.3.5.3]	36.8492	0.732075	5.6535	36.1172	0.953769		36.8492	0.0187795	10.9383	36.8304	0.997198		0.732075	0.0187795	5.28476	0.713296	0.308921			KO:K01142	E3.1.11.2, xthA; exodeoxyribonuclease III [EC:3.1.11.2]	64.5353	75.8226	-0.232539	11.2873	0.44217		64.5353	5.49382	3.55421	59.0415	0.897596		75.8226	5.49382	3.78675	70.3288	0.902438
KO:K00231	PPOX, hemY; protoporphyrinogen/coproporphyrinogen III oxidase [EC:1.3.3.4 1.3.3.15]	103.551	123.473	-0.253848	19.9215	0.457431		103.551	71.1936	0.540525	32.3577	0.692881		123.473	71.1936	0.794373	52.2792	0.773505			KO:K01147	rnb; exoribonuclease II [EC:3.1.13.1]	65.9803	30.3354	1.12103	35.6448	0.789501		65.9803	0.0187795	11.7787	65.9615	0.999749		30.3354	0.0187795	10.6576	30.3167	0.993142
KO:K00232	E1.3.3.6, ACOX1, ACOX3; acyl-CoA oxidase [EC:1.3.3.6]	0.108819	0.0284763	1.93409	0.0803424	0.2862		0.108819	0.0187795	2.5347	0.0900392	0.348547		NA	NA	NA	NA	NA			KO:K01156	res; type III restriction enzyme [EC:3.1.21.5]	411.259	190.827	1.10778	220.432	0.790543		411.259	16.0731	4.67733	395.186	0.898035		190.827	16.0731	3.56954	174.754	0.902649
KO:K00239	sdhA, frdA; succinate dehydrogenase / fumarate reductase, flavoprotein subunit [EC:1.3.5.1 1.3.5.4]	312.067	377.348	-0.27404	65.281	0.477318		312.067	832.349	-1.41533	520.282	0.856669		377.348	832.349	-1.14129	455.001	0.844912			KO:K01173	ENDOG; endonuclease G, mitochondrial	29.0102	15.1829	0.93411	13.8273	0.684583		29.0102	0.0187795	10.5932	28.9914	0.99285		15.1829	0.0187795	9.65908	15.1641	0.951864
KO:K00240	sdhB, frdB; succinate dehydrogenase / fumarate reductase, iron-sulfur subunit [EC:1.3.5.1 1.3.5.4]	216.317	274.096	-0.341537	57.7795	0.524445		216.317	483.756	-1.16113	267.439	0.838982		274.096	483.756	-0.819596	209.659	0.781067			KO:K01176	AMY, amyA, malS; alpha-amylase [EC:3.2.1.1]	86.7773	30.81	1.49392	55.9673	0.817043		86.7773	0.0187795	12.1739	86.7585	0.999895		30.81	0.0187795	10.68	30.7913	0.993142
KO:K00241	sdhC, frdC; succinate dehydrogenase / fumarate reductase, cytochrome b subunit	158.154	212.34	-0.425043	54.1857	0.581389		158.154	300.408	-0.925588	142.253	0.789013		212.34	300.408	-0.500545	88.0677	0.681336			KO:K01183	E3.2.1.14; chitinase [EC:3.2.1.14]	65.6015	29.7007	1.14323	35.9008	0.791323		65.6015	0.370557	7.46789	65.231	0.993958		29.7007	0.370557	6.32466	29.3301	0.958699
KO:K00242	sdhD, frdD; succinate dehydrogenase / fumarate reductase, membrane anchor subunit	60.7465	142.753	-1.23265	82.0063	0.801247		60.7465	210.896	-1.79566	150.15	0.876803		142.753	210.896	-0.563015	68.1435	0.700223			KO:K01194	TREH, treA, treF; alpha,alpha-trehalase [EC:3.2.1.28]	16.3439	9.86151	0.728869	6.48236	0.565504		16.3439	0.0187795	9.76538	16.3251	0.963255		9.86151	0.0187795	9.03651	9.84273	0.879086
KO:K00244	frdA; fumarate reductase flavoprotein subunit [EC:1.3.5.4]	6.78769	4.22159	0.685136	2.56611	0.435129		6.78769	0.0187795	8.49762	6.76891	0.826406		4.22159	0.0187795	7.81248	4.20281	0.721208			KO:K01208	cd, ma, nplT; cyclomaltodextrinase / maltogenic alpha-amylase / neopullulanase [EC:3.2.1.54 3.2.1.133 3.2.1.135]	22.2583	0.375861	5.888	21.8824	0.940466		22.2583	0.0187795	10.211	22.2395	0.98411		0.375861	0.0187795	4.32297	0.357082	0.308921
KO:K00245	frdB; fumarate reductase iron-sulfur subunit [EC:1.3.5.4]	9.01752	11.6281	-0.366812	2.61057	0.393689		9.01752	49.8454	-2.46666	40.8278	0.89193		11.6281	49.8454	-2.09984	38.2173	0.891606			KO:K01222	E3.2.1.86A, celF; 6-phospho-beta-glucosidase [EC:3.2.1.86]	36.5436	19.0342	0.941024	17.5094	0.706963		36.5436	0.0187795	10.9262	36.5248	0.997198		19.0342	0.0187795	9.98522	19.0154	0.972438
KO:K00246	frdC; fumarate reductase subunit C	0.578375	0.0284763	4.34417	0.549899	0.2862		0.578375	0.0187795	4.94478	0.559596	0.348547		NA	NA	NA	NA	NA			KO:K01234	NA	28.243	6.92197	2.02864	21.321	0.839618		28.243	0.0187795	10.5545	28.2242	0.99285		6.92197	0.0187795	8.52588	6.90319	0.803623
KO:K00248	ACADS, bcd; butyryl-CoA dehydrogenase [EC:1.3.8.1]	145.125	177.638	-0.291644	32.5131	0.489472		145.125	155.34	-0.0981325	10.2149	0.417008		177.638	155.34	0.193512	22.2982	0.473142			KO:K01236	treZ, glgZ; maltooligosyltrehalose trehalohydrolase [EC:3.2.1.141]	52.4062	2.59671	4.33498	49.8095	0.865368		52.4062	0.0187795	11.4464	52.3874	0.999446		2.59671	0.0187795	7.11139	2.57793	0.588898
KO:K00249	ACADM, acd; acyl-CoA dehydrogenase [EC:1.3.8.7]	326.64	448.105	-0.456136	121.465	0.593261		326.64	2376.09	-2.86282	2049.45	0.897219		448.105	2376.09	-2.40668	1927.99	0.898828			KO:K01240	URH1; uridine nucleosidase [EC:3.2.2.3]	11.7591	0.0284763	8.6898	11.7306	0.927269		11.7591	0.0187795	9.2904	11.7403	0.921984		NA	NA	NA	NA	NA
KO:K00252	GCDH, gcdH; glutaryl-CoA dehydrogenase [EC:1.3.8.6]	97.0015	73.9375	0.391701	23.064	0.547906		97.0015	24.4903	1.9858	72.5112	0.879333		73.9375	24.4903	1.5941	49.4472	0.881102			KO:K01243	mtnN, mtn, pfs; adenosylhomocysteine nucleosidase [EC:3.2.2.9]	39.9051	6.49207	2.61982	33.413	0.860606		39.9051	0.0187795	11.0532	39.8863	0.99792		6.49207	0.0187795	8.43338	6.47329	0.803623
KO:K00253	IVD, ivd; isovaleryl-CoA dehydrogenase [EC:1.3.8.4]	4.41783	6.97663	-0.659193	2.5588	0.435129		4.41783	0.273856	4.01185	4.14397	0.650408		6.97663	0.273856	4.67104	6.70278	0.706753			KO:K01259	pip; proline iminopeptidase [EC:3.4.11.5]	72.2214	19.8937	1.86011	52.3277	0.843777		72.2214	0.256041	8.13991	71.9654	0.998871		19.8937	0.256041	6.2798	19.6377	0.938804
KO:K00254	DHODH, pyrD; dihydroorotate dehydrogenase [EC:1.3.5.2]	111.183	47.8682	1.2158	63.315	0.80112		111.183	423.501	-1.92943	312.318	0.879542		47.8682	423.501	-3.14523	375.633	0.902169			KO:K01266	dmpA, dap; D-aminopeptidase [EC:3.4.11.19]	12.2626	71.4171	-2.54201	59.1545	0.860625		12.2626	0.0187795	9.35089	12.2438	0.93317		71.4171	0.0187795	11.8929	71.3983	0.99973
KO:K00255	ACADL; long-chain-acyl-CoA dehydrogenase [EC:1.3.8.8]	20.3164	0.0284763	9.47867	20.288	0.982187		20.3164	0.0187795	10.0793	20.2977	0.979615		NA	NA	NA	NA	NA			KO:K01270	pepD; dipeptidase D [EC:3.4.13.-]	13.0242	2.82804	2.20332	10.1962	0.77126		13.0242	0.0187795	9.43782	13.0054	0.942578		2.82804	0.0187795	7.2345	2.80926	0.588898
KO:K00256	E1.3.99.16; isoquinoline 1-oxidoreductase [EC:1.3.99.16]	3.02821	0.728774	2.05492	2.29944	0.496611		3.02821	0.0187795	7.33317	3.00943	0.695944		0.728774	0.0187795	5.27824	0.709994	0.308921			KO:K01278	DPP4, CD26; dipeptidyl-peptidase 4 [EC:3.4.14.5]	35.5141	35.5709	-0.00230491	0.0567841	0.2862		35.5141	0.174341	7.67033	35.3397	0.991052		35.5709	0.174341	7.67264	35.3965	0.990715
KO:K00257	mbtN, fadE14; acyl-ACP dehydrogenase [EC:1.3.99.-]	358.529	361.402	-0.0115152	2.87313	0.286833		358.529	479.164	-0.41843	120.635	0.652666		361.402	479.164	-0.406915	117.762	0.625369			KO:K01286	E3.4.16.4; D-alanyl-D-alanine carboxypeptidase [EC:3.4.16.4]	18.172	11.4033	0.67226	6.76864	0.559145		18.172	0.0187795	9.91834	18.1532	0.972413		11.4033	0.0187795	9.24608	11.3845	0.912298
KO:K00259	ald; alanine dehydrogenase [EC:1.4.1.1]	267.675	129.04	1.05266	138.635	0.788333		267.675	35.7468	2.90459	231.928	0.897219		129.04	35.7468	1.85193	93.2934	0.885756			KO:K01298	CPA2; carboxypeptidase A2 [EC:3.4.17.15]	29.6552	4.42786	2.7436	25.2273	0.855269		29.6552	0.0187795	10.6249	29.6364	0.993749		4.42786	0.0187795	7.88131	4.40908	0.721208
KO:K00260	gudB, rocG; glutamate dehydrogenase [EC:1.4.1.2]	18.4222	61.0328	-1.72814	42.6107	0.839823		18.4222	2.13628	3.10827	16.2859	0.860851		61.0328	2.13628	4.83641	58.8966	0.902239			KO:K01301	NAALAD; N-acetylated-alpha-linked acidic dipeptidase [EC:3.4.17.21]	6.05051	15.1799	-1.32704	9.12941	0.716508		6.05051	0.0187795	8.33176	6.03173	0.826406		15.1799	0.0187795	9.65879	15.1611	0.951864
KO:K00261	GLUD1_2, gdhA; glutamate dehydrogenase (NAD(P)+) [EC:1.4.1.3]	311.356	508.375	-0.707329	197.019	0.69031		311.356	642.71	-1.0456	331.355	0.834163		508.375	642.71	-0.338276	134.335	0.591723			KO:K01304	pcp; pyroglutamyl-peptidase [EC:3.4.19.3]	33.9081	6.58942	2.36341	27.3187	0.854071		33.9081	0.45085	6.23284	33.4572	0.963715		6.58942	0.45085	3.86943	6.13857	0.706753
KO:K00262	E1.4.1.4, gdhA; glutamate dehydrogenase (NADP+) [EC:1.4.1.4]	23.0154	23.7217	-0.0436098	0.706331	0.2862		23.0154	11.3224	1.02342	11.693	0.760997		23.7217	11.3224	1.06703	12.3993	0.769648			KO:K01342	aprE; subtilisin [EC:3.4.21.62]	30.6319	44.0046	-0.522621	13.3727	0.589258		30.6319	0.547818	5.80519	30.084	0.962241		44.0046	0.547818	6.32781	43.4568	0.964818
KO:K00263	E1.4.1.9; leucine dehydrogenase [EC:1.4.1.9]	25.3715	53.1795	-1.06766	27.808	0.782723		25.3715	0.0187795	10.3998	25.3527	0.989233		53.1795	0.0187795	11.4675	53.1607	0.999297			KO:K01354	ptrB; oligopeptidase B [EC:3.4.21.83]	38.5843	1.6807	4.52088	36.9036	0.863898		38.5843	0.447212	6.43091	38.1371	0.965482		1.6807	0.447212	1.91003	1.23348	0.418746
KO:K00265	gltB; glutamate synthase (NADPH/NADH) large chain [EC:1.4.1.13 1.4.1.14]	85.885	119.63	-0.478102	33.7451	0.596747		85.885	80.3115	0.0967997	5.57351	0.412137		119.63	80.3115	0.574902	39.3186	0.699613			KO:K01356	lexA; repressor LexA [EC:3.4.21.88]	198.284	185.419	0.0967798	12.8651	0.343991		198.284	25.4004	2.96465	172.884	0.89723		185.419	25.4004	2.86787	160.018	0.901688
KO:K00266	gltD; glutamate synthase (NADPH/NADH) small chain [EC:1.4.1.13 1.4.1.14]	77.0512	164.122	-1.09088	87.0707	0.789696		77.0512	162.169	-1.07361	85.118	0.834591		164.122	162.169	0.0172677	1.95267	0.314912			KO:K01406	prtC; serralysin [EC:3.4.24.40]	13.4245	1.18091	3.5069	12.2436	0.803214		13.4245	0.0187795	9.48149	13.4057	0.942578		1.18091	0.0187795	5.97459	1.16213	0.482345
KO:K00273	DAO, aao; D-amino-acid oxidase [EC:1.4.3.3]	2.92715	13.4022	-2.1949	10.475	0.77126		2.92715	0.0187795	7.2842	2.90837	0.624409		13.4022	0.0187795	9.47909	13.3834	0.935135			KO:K01424	E3.5.1.1, ansA, ansB; L-asparaginase [EC:3.5.1.1]	110.656	80.4961	0.459088	30.1597	0.591556		110.656	0.0187795	12.5246	110.637	0.999979		80.4961	0.0187795	12.0655	80.4773	0.999871
KO:K00274	MAO, aofH; monoamine oxidase [EC:1.4.3.4]	183.145	41.6723	2.13583	141.473	0.85521		183.145	0.0187795	13.2515	183.126	1		41.6723	0.0187795	11.1157	41.6535	0.998159			KO:K01428	ureC; urease subunit alpha [EC:3.5.1.5]	47.4903	5.07982	3.22478	42.4105	0.86455		47.4903	0.0187795	11.3043	47.4715	0.999195		5.07982	0.0187795	8.07948	5.06104	0.766729
KO:K00275	pdxH, PNPO; pyridoxamine 5'-phosphate oxidase [EC:1.4.3.5]	140.917	75.9667	0.89141	64.9506	0.729548		140.917	72.2558	0.963663	68.6615	0.789975		75.9667	72.2558	0.0722526	3.71084	0.351946			KO:K01429	ureB; urease subunit beta [EC:3.5.1.5]	12.0191	4.85606	1.30747	7.16302	0.670413		12.0191	0.0187795	9.32195	12.0003	0.93317		4.85606	0.0187795	8.01449	4.83728	0.721208
KO:K00276	AOC3, AOC2, tynA; primary-amine oxidase [EC:1.4.3.21]	14.8283	0.0284763	9.02438	14.7999	0.953935		14.8283	0.0187795	9.62498	14.8095	0.950951		NA	NA	NA	NA	NA			KO:K01430	ureA; urease subunit gamma [EC:3.5.1.5]	13.3696	4.99368	1.42078	8.37594	0.701412		13.3696	0.0187795	9.47559	13.3508	0.942578		4.99368	0.0187795	8.0548	4.9749	0.721208
KO:K00278	nadB; L-aspartate oxidase [EC:1.4.3.16]	242.228	176.315	0.458206	65.9125	0.593124		242.228	166.221	0.543261	76.0068	0.696101		176.315	166.221	0.0850545	10.0942	0.376952			KO:K01436	K01436; amidohydrolase [EC:3.5.1.-]	218.048	54.2739	2.00632	163.775	0.854899		218.048	0.0187795	13.5032	218.03	1		54.2739	0.0187795	11.4969	54.2551	0.999332
KO:K00279	CKX; cytokinin dehydrogenase [EC:1.5.99.12]	0.0284763	6.57156	-7.85033	6.54308	0.829431		NA	NA	NA	NA	NA		6.57156	0.0187795	8.45093	6.55278	0.803623			KO:K01444	AGA, aspG; N4-(beta-N-acetylglucosaminyl)-L-asparaginase [EC:3.5.1.26]	57.5861	65.1881	-0.178889	7.60204	0.398529		57.5861	0.298923	7.5898	57.2871	0.99378		65.1881	0.298923	7.76869	64.8892	0.997222
KO:K00280	LOXL2_3_4; lysyl oxidase-like protein 2/3/4 [EC:1.4.3.-]	1.05247	0.0284763	5.20787	1.02399	0.494595		1.05247	0.0187795	5.80847	1.03369	0.524096		NA	NA	NA	NA	NA			KO:K01451	hipO; hippurate hydrolase [EC:3.5.1.32]	23.3975	42.2288	-0.851873	18.8313	0.702464		23.3975	0.0187795	10.283	23.3787	0.986159		42.2288	0.0187795	11.1349	42.2101	0.998347
KO:K00281	GLDC, gcvP; glycine dehydrogenase [EC:1.4.4.2]	75.0316	4.22511	4.15044	70.8065	0.865855		75.0316	0.0187795	11.9641	75.0129	0.999833		4.22511	0.0187795	7.81369	4.20633	0.721208			KO:K01452	E3.5.1.41; chitin deacetylase [EC:3.5.1.41]	25.7273	4.62314	2.47636	21.1042	0.845501		25.7273	0.0187795	10.4199	25.7085	0.989233		4.62314	0.0187795	7.94357	4.60436	0.721208
KO:K00282	gcvPA; glycine dehydrogenase subunit 1 [EC:1.4.4.2]	207.18	335.906	-0.697174	128.726	0.688966		207.18	314.105	-0.600363	106.925	0.730765		335.906	314.105	0.0968111	21.8011	0.386905			KO:K01457	atzF; allophanate hydrolase [EC:3.5.1.54]	14.9466	0.0284763	9.03584	14.9181	0.953935		14.9466	0.0187795	9.63644	14.9278	0.950951		NA	NA	NA	NA	NA
KO:K00283	gcvPB; glycine dehydrogenase subunit 2 [EC:1.4.4.2]	228.426	341.234	-0.579034	112.808	0.663868		228.426	233.803	-0.0335647	5.3767	0.36222		341.234	233.803	0.54547	107.431	0.698335			KO:K01466	allB; allantoinase [EC:3.5.2.5]	20.74	11.706	0.825169	9.03403	0.636852		20.74	235.527	-3.5054	214.787	0.897993		11.706	235.527	-4.33057	223.821	0.902767
KO:K00284	E1.4.7.1; glutamate synthase (ferredoxin) [EC:1.4.7.1]	126.478	65.0851	0.95849	61.3931	0.733736		126.478	45.9392	1.46109	80.539	0.85737		65.0851	45.9392	0.5026	19.1458	0.66422			KO:K01467	ampC; beta-lactamase class C [EC:3.5.2.6]	55.2899	7.93095	2.80145	47.359	0.863041		55.2899	0.0187795	11.5236	55.2712	0.99955		7.93095	0.0187795	8.72219	7.91217	0.833798
KO:K00285	dadA; D-amino-acid dehydrogenase [EC:1.4.5.1]	13.7149	69.8695	-2.34892	56.1545	0.860236		13.7149	402.522	-4.87525	388.807	0.898035		69.8695	402.522	-2.52633	332.653	0.899097			KO:K01469	OPLAH, OXP1, oplAH; 5-oxoprolinase (ATP-hydrolysing) [EC:3.5.2.9]	15.8874	13.7762	0.2057	2.11115	0.360129		15.8874	0.221882	6.16195	15.6655	0.925172		13.7762	0.221882	5.95625	13.5544	0.901512
KO:K00286	proC; pyrroline-5-carboxylate reductase [EC:1.5.1.2]	149.783	149.153	0.00607773	0.629671	0.2862		149.783	179.577	-0.261729	29.794	0.551024		149.153	179.577	-0.267807	30.4237	0.540563			KO:K01478	arcA; arginine deiminase [EC:3.5.3.6]	15.3846	6.98071	1.14004	8.40393	0.68397		15.3846	55.5506	-1.85231	40.166	0.87718		6.98071	55.5506	-2.99236	48.5699	0.90068
KO:K00287	DHFR, folA; dihydrofolate reductase [EC:1.5.1.3]	13.9632	3.28806	2.08632	10.6751	0.770364		13.9632	0.0187795	9.53826	13.9444	0.942578		3.28806	0.0187795	7.45193	3.26928	0.663283			KO:K01488	add, ADA; adenosine deaminase [EC:3.5.4.4]	93.366	82.6836	0.175296	10.6824	0.404139		93.366	12.1542	2.94144	81.2118	0.897073		82.6836	12.1542	2.76614	70.5293	0.900516
KO:K00288	MTHFD; methylenetetrahydrofolate dehydrogenase (NADP+) / methenyltetrahydrofolate cyclohydrolase / formyltetrahydrofolate synthetase [EC:1.5.1.5 3.5.4.9 6.3.4.3]	21.5019	20.0405	0.10154	1.46132	0.313148		21.5019	7.72309	1.47721	13.7788	0.800868		20.0405	7.72309	1.37567	12.3175	0.788171			KO:K01493	comEB; dCMP deaminase [EC:3.5.4.12]	101.467	81.9965	0.307375	19.4704	0.497906		101.467	0.239745	8.72529	101.227	0.999843		81.9965	0.239745	8.41792	81.7568	0.999519
KO:K00290	LYS1; saccharopine dehydrogenase (NAD+, L-lysine forming) [EC:1.5.1.7]	19.4236	28.9823	-0.577362	9.55872	0.599279		19.4236	40.4249	-1.05743	21.0013	0.817217		28.9823	40.4249	-0.480072	11.4426	0.615569			KO:K01499	mch; methenyltetrahydromethanopterin cyclohydrolase [EC:3.5.4.27]	5.57259	15.4137	-1.4678	9.84116	0.720199		5.57259	0.167558	5.05561	5.40503	0.691668		15.4137	0.167558	6.52341	15.2462	0.918242
KO:K00292	NA	0.841342	0.152829	2.46077	0.688512	0.2862		0.841342	0.0187795	5.48546	0.822562	0.348547		0.152829	0.0187795	3.02469	0.13405	0.308921			KO:K01501	E3.5.5.1; nitrilase [EC:3.5.5.1]	5.11763	12.4363	-1.281	7.31862	0.670413		5.11763	0.0187795	8.09018	5.09885	0.792714		12.4363	0.0187795	9.37118	12.4175	0.924912
KO:K00293	LYS9; saccharopine dehydrogenase (NADP+, L-glutamate forming) [EC:1.5.1.10]	8.4352	1.13562	2.89295	7.29959	0.723276		8.4352	0.0187795	8.81112	8.41642	0.87488		1.13562	0.0187795	5.91818	1.11684	0.482345			KO:K01518	NUDT2; bis(5'-nucleosidyl)-tetraphosphatase [EC:3.6.1.17]	10.8349	6.07352	0.83508	4.76137	0.527922		10.8349	0.0187795	9.17231	10.8161	0.908708		6.07352	0.0187795	8.33723	6.05474	0.803623
KO:K00294	E1.2.1.88; 1-pyrroline-5-carboxylate dehydrogenase [EC:1.2.1.88]	139.148	152.259	-0.129904	13.1107	0.367949		139.148	312.38	-1.16668	173.232	0.840905		152.259	312.38	-1.03678	160.121	0.839941			KO:K01531	mgtA, mgtB; Mg2+-importing ATPase [EC:3.6.3.2]	30.5069	39.2662	-0.36415	8.75924	0.498831		30.5069	0.663237	5.52347	29.8437	0.891783		39.2662	0.663237	5.88762	38.6029	0.96381
KO:K00297	metF, MTHFR; methylenetetrahydrofolate reductase (NADPH) [EC:1.5.1.20]	135.316	76.2337	0.827835	59.0826	0.719741		135.316	20.5041	2.72235	114.812	0.896017		76.2337	20.5041	1.89452	55.7296	0.885475			KO:K01556	KYNU, kynU; kynureninase [EC:3.7.1.3]	56.7122	29.3602	0.949797	27.352	0.727756		56.7122	0.0187795	11.5603	56.6934	0.999561		29.3602	0.0187795	10.6105	29.3414	0.992333
KO:K00299	ssuE; FMN reductase [EC:1.5.1.38]	41.0698	0.0284763	10.4941	41.0413	0.998831		41.0698	0.0187795	11.0947	41.051	0.998401		NA	NA	NA	NA	NA			KO:K01561	dehH; haloacetate dehalogenase [EC:3.8.1.3]	31.2416	0.23817	7.03533	31.0034	0.989248		31.2416	0.0187795	10.7001	31.2228	0.994982		0.23817	0.0187795	3.66477	0.219391	0.308921
KO:K00301	E1.5.3.1; sarcosine oxidase [EC:1.5.3.1]	112.197	25.0571	2.16274	87.1397	0.855171		112.197	19.6844	2.51091	92.5124	0.893728		25.0571	19.6844	0.348168	5.37271	0.498558			KO:K01563	dhaA; haloalkane dehalogenase [EC:3.8.1.5]	43.1791	4.81662	3.16424	38.3624	0.863839		43.1791	0.0187795	11.167	43.1603	0.998766		4.81662	0.0187795	8.00272	4.79784	0.721208
KO:K00302	soxA; sarcosine oxidase, subunit alpha [EC:1.5.3.1]	7.21529	19.178	-1.41033	11.9628	0.742501		7.21529	0.0187795	8.58576	7.19651	0.852666		19.178	0.0187795	9.99608	19.1593	0.972438			KO:K01572	oadB; oxaloacetate decarboxylase, beta subunit [EC:4.1.1.3]	61.5179	13.3822	2.20069	48.1356	0.855298		61.5179	0.0187795	11.6776	61.4991	0.999665		13.3822	0.0187795	9.47695	13.3634	0.935135
KO:K00303	soxB; sarcosine oxidase, subunit beta [EC:1.5.3.1]	116.085	213.287	-0.877611	97.2018	0.727649		116.085	307.093	-1.40349	191.007	0.85484		213.287	307.093	-0.525877	93.8055	0.692767			KO:K01574	adc; acetoacetate decarboxylase [EC:4.1.1.4]	0.697969	4.67221	-2.74287	3.97424	0.56643		0.697969	63.0936	-6.49819	62.3956	0.967499		4.67221	63.0936	-3.75532	58.4214	0.902192
KO:K00304	soxD; sarcosine oxidase, subunit delta [EC:1.5.3.1]	0.150771	0.0284763	2.40452	0.122294	0.2862		0.150771	0.0187795	3.00513	0.131991	0.348547		NA	NA	NA	NA	NA			KO:K01576	mdlC; benzoylformate decarboxylase [EC:4.1.1.7]	83.0915	46.1574	0.848139	36.9341	0.722302		83.0915	0.483554	7.42488	82.6079	0.994062		46.1574	0.483554	6.57674	45.6738	0.965041
KO:K00306	PIPOX; sarcosine oxidase / L-pipecolate oxidase [EC:1.5.3.1 1.5.3.7]	1.40172	0.0284763	5.62129	1.37324	0.494595		1.40172	0.0187795	6.2219	1.38294	0.524096		NA	NA	NA	NA	NA			KO:K01582	E4.1.1.18, ldcC, cadA; lysine decarboxylase [EC:4.1.1.18]	14.6162	13.462	0.118681	1.15426	0.317335		14.6162	0.0187795	9.6042	14.5975	0.950951		13.462	0.0187795	9.48552	13.4432	0.935135
KO:K00311	ETFDH; electron-transferring-flavoprotein dehydrogenase [EC:1.5.5.1]	87.0562	11.6406	2.90278	75.4156	0.864774		87.0562	0.0187795	12.1786	87.0374	0.999895		11.6406	0.0187795	9.27579	11.6218	0.912298			KO:K01583	E4.1.1.19; arginine decarboxylase [EC:4.1.1.19]	25.6319	0.447864	5.83874	25.1841	0.947312		25.6319	0.0187795	10.4146	25.6132	0.989233		0.447864	0.0187795	4.57583	0.429084	0.308921
KO:K00313	fixC; electron transfer flavoprotein-quinone oxidoreductase [EC:1.5.5.-]	56.3021	88.9833	-0.660345	32.6811	0.675935		56.3021	294.79	-2.38843	238.488	0.893592		88.9833	294.79	-1.72808	205.807	0.882567			KO:K01585	speA; arginine decarboxylase [EC:4.1.1.19]	100.697	31.5734	1.67324	69.124	0.840261		100.697	0.0187795	12.3886	100.679	0.999948		31.5734	0.0187795	10.7153	31.5546	0.993939
KO:K00315	DMGDH; dimethylglycine dehydrogenase [EC:1.5.8.4]	1.36271	0.0284763	5.58057	1.33423	0.494595		1.36271	0.0187795	6.18118	1.34393	0.524096		NA	NA	NA	NA	NA			KO:K01593	DDC, TDC; aromatic-L-amino-acid decarboxylase [EC:4.1.1.28]	23.8939	14.2889	0.741743	9.60494	0.626412		23.8939	0.0187795	10.3133	23.8751	0.986159		14.2889	0.0187795	9.57152	14.2701	0.944033
KO:K00317	dmd-tmd; dimethylamine/trimethylamine dehydrogenase [EC:1.5.8.1 1.5.8.2]	20.581	0.113925	7.49708	20.4671	0.980931		20.581	0.0187795	10.0979	20.5622	0.979615		0.113925	0.0187795	2.60086	0.0951455	0.308921			KO:K01601	rbcL; ribulose-bisphosphate carboxylase large chain [EC:4.1.1.39]	78.2717	55.4322	0.497767	22.8395	0.604733		78.2717	1.06437	6.20042	77.2074	0.967656		55.4322	1.06437	5.70266	54.3679	0.902098
KO:K00318	PRODH; proline dehydrogenase [EC:1.5.-.-]	137.312	152.9	-0.155121	15.5871	0.390212		137.312	73.8327	0.89513	63.4797	0.786117		152.9	73.8327	1.05025	79.0668	0.840106			KO:K01602	rbcS; ribulose-bisphosphate carboxylase small chain [EC:4.1.1.39]	48.2138	15.8638	1.60371	32.35	0.836726		48.2138	0.0187795	11.3261	48.1951	0.999247		15.8638	0.0187795	9.72237	15.845	0.951864
KO:K00319	mtd; methylenetetrahydromethanopterin dehydrogenase [EC:1.5.98.1]	0.447815	10.8674	-4.60096	10.4196	0.780717		0.447815	0.0187795	4.57567	0.429036	0.348547		10.8674	0.0187795	9.17664	10.8486	0.89687			KO:K01607	pcaC; 4-carboxymuconolactone decarboxylase [EC:4.1.1.44]	29.7906	32.1575	-0.110297	2.36689	0.330989		29.7906	0.0187795	10.6315	29.7718	0.993749		32.1575	0.0187795	10.7418	32.1387	0.994689
KO:K00320	mer; 5,10-methylenetetrahydromethanopterin reductase [EC:1.5.98.2]	99.7598	154.509	-0.631165	54.7497	0.670695		99.7598	616.721	-2.62809	516.961	0.895934		154.509	616.721	-1.99692	462.211	0.894115			KO:K01617	dmpH, xylI, nahK; 2-oxo-3-hexenedioate decarboxylase [EC:4.1.1.77]	3.94979	11.6057	-1.55499	7.65595	0.681418		3.94979	0.0187795	7.71648	3.93101	0.695944		11.6057	0.0187795	9.27147	11.587	0.912298
KO:K00322	sthA, udhA; NAD(P) transhydrogenase [EC:1.6.1.1]	31.2157	4.70709	2.72936	26.5086	0.856437		31.2157	0.0187795	10.6989	31.1969	0.994982		4.70709	0.0187795	7.96954	4.68831	0.721208			KO:K01620	ltaE; threonine aldolase [EC:4.1.2.48]	252.187	229.313	0.137178	22.8743	0.376675		252.187	34.5785	2.86655	217.609	0.897219		229.313	34.5785	2.72937	194.735	0.900785
KO:K00324	pntA; NAD(P) transhydrogenase subunit alpha [EC:1.6.1.2]	230.4	170.531	0.434111	59.8696	0.581457		230.4	79.5043	1.53504	150.896	0.858258		170.531	79.5043	1.10093	91.0264	0.842603			KO:K01621	xfp, xpk; xylulose-5-phosphate/fructose-6-phosphate phosphoketolase [EC:4.1.2.9 4.1.2.22]	38.2353	7.26097	2.39667	30.9743	0.856175		38.2353	0.0187795	10.9915	38.2165	0.997669		7.26097	0.0187795	8.59486	7.24219	0.833798
KO:K00325	pntB; NAD(P) transhydrogenase subunit beta [EC:1.6.1.2]	154.409	94.1476	0.713762	60.2616	0.690115		154.409	40.5035	1.93064	113.906	0.879532		94.1476	40.5035	1.21688	53.6441	0.850938			KO:K01626	E2.5.1.54, aroF, aroG, aroH; 3-deoxy-7-phosphoheptulonate synthase [EC:2.5.1.54]	101.852	0.0284763	11.8044	101.823	1		101.852	0.0187795	12.405	101.833	0.999948		NA	NA	NA	NA	NA
KO:K00330	nuoA; NADH-quinone oxidoreductase subunit A [EC:1.6.5.3]	260.237	355.204	-0.448823	94.9672	0.588839		260.237	461.963	-0.827952	201.726	0.778183		355.204	461.963	-0.379129	106.759	0.615229			KO:K01629	rhaD; rhamnulose-1-phosphate aldolase [EC:4.1.2.19]	24.6121	0.133546	7.52589	24.4786	0.988937		24.6121	0.0187795	10.356	24.5933	0.98779		0.133546	0.0187795	2.8301	0.114766	0.308921
KO:K00331	nuoB; NADH-quinone oxidoreductase subunit B [EC:1.6.5.3]	245.29	340.447	-0.472945	95.1577	0.596523		245.29	512.132	-1.06203	266.842	0.834455		340.447	512.132	-0.589083	171.684	0.730141			KO:K01630	garL; 2-dehydro-3-deoxyglucarate aldolase [EC:4.1.2.20]	32.887	4.70745	2.8045	28.1796	0.858171		32.887	95.9118	-1.54419	63.0248	0.857976		4.70745	95.9118	-4.34869	91.2044	0.902696
KO:K00332	nuoC; NADH-quinone oxidoreductase subunit C [EC:1.6.5.3]	221.359	326.299	-0.559802	104.939	0.629577		221.359	603.444	-1.44683	382.085	0.856795		326.299	603.444	-0.887027	277.145	0.790281			KO:K01639	E4.1.3.3, nanA, NPL; N-acetylneuraminate lyase [EC:4.1.3.3]	22.0882	48.6199	-1.13827	26.5317	0.786473		22.0882	316.62	-3.84141	294.532	0.898035		48.6199	316.62	-2.70313	268.001	0.900785
KO:K00333	nuoD; NADH-quinone oxidoreductase subunit D [EC:1.6.5.3]	342.315	387.029	-0.177116	44.7137	0.407119		342.315	470.191	-0.457921	127.876	0.667374		387.029	470.191	-0.280805	83.162	0.548875			KO:K01654	E2.5.1.56, neuB; N-acetylneuraminate synthase [EC:2.5.1.56]	31.1914	23.8672	0.38612	7.3242	0.494936		31.1914	0.0187795	10.6978	31.1726	0.994982		23.8672	0.0187795	10.3117	23.8484	0.983763
KO:K00334	nuoE; NADH-quinone oxidoreductase subunit E [EC:1.6.5.3]	183.146	266.862	-0.543097	83.7156	0.624786		183.146	119.882	0.611381	63.2642	0.731988		266.862	119.882	1.15448	146.98	0.845147			KO:K01659	prpC; 2-methylcitrate synthase [EC:2.3.3.5]	13.2631	16.5926	-0.323123	3.32951	0.41828		13.2631	0.0187795	9.46404	13.2443	0.942578		16.5926	0.0187795	9.78717	16.5738	0.958511
KO:K00335	nuoF; NADH-quinone oxidoreductase subunit F [EC:1.6.5.3]	277.677	406.276	-0.54905	128.598	0.627474		277.677	149.484	0.893415	128.193	0.786191		406.276	149.484	1.44246	256.791	0.864467			KO:K01666	mhpE; 4-hydroxy 2-oxovalerate aldolase [EC:4.1.3.39]	51.7595	47.01	0.138854	4.74942	0.363352		51.7595	0.897789	5.8493	50.8617	0.967186		47.01	0.897789	5.71045	46.1123	0.901547
KO:K00336	nuoG; NADH-quinone oxidoreductase subunit G [EC:1.6.5.3]	182.438	183.256	-0.00645075	0.817567	0.2862		182.438	99.7479	0.871051	82.6904	0.784361		183.256	99.7479	0.877502	83.508	0.788804			KO:K01668	E4.1.99.2; tyrosine phenol-lyase [EC:4.1.99.2]	37.9959	2.22894	4.09141	35.7669	0.863566		37.9959	0.211497	7.48906	37.7844	0.991616		2.22894	0.211497	3.39765	2.01745	0.504056
KO:K00337	nuoH; NADH-quinone oxidoreductase subunit H [EC:1.6.5.3]	325.962	414.811	-0.347752	88.8495	0.530093		325.962	809.714	-1.31271	483.752	0.846529		414.811	809.714	-0.964958	394.903	0.795029			KO:K01676	E4.2.1.2A, fumA, fumB; fumarate hydratase, class I [EC:4.2.1.2]	34.5508	37.8258	-0.13065	3.27498	0.350614		34.5508	0.333728	6.6939	34.2171	0.96429		37.8258	0.333728	6.82455	37.4921	0.984818
KO:K00338	nuoI; NADH-quinone oxidoreductase subunit I [EC:1.6.5.3]	255.92	339.092	-0.405983	83.1718	0.555337		255.92	482.969	-0.916238	227.049	0.788344		339.092	482.969	-0.510255	143.877	0.687304			KO:K01682	acnB; aconitate hydratase 2 / 2-methylisocitrate dehydratase [EC:4.2.1.3 4.2.1.99]	62.8568	2.04218	4.94389	60.8146	0.865719		62.8568	0.0187795	11.7087	62.838	0.999686		2.04218	0.0187795	6.76481	2.0234	0.588898
KO:K00339	nuoJ; NADH-quinone oxidoreductase subunit J [EC:1.6.5.3]	241.89	354.748	-0.552448	112.859	0.627474		241.89	401.913	-0.732535	160.023	0.754035		354.748	401.913	-0.180087	47.1645	0.462931			KO:K01685	uxaA; altronate hydrolase [EC:4.2.1.7]	25.4018	27.9981	-0.140399	2.59631	0.342511		25.4018	173.455	-2.77156	148.053	0.896028		27.9981	173.455	-2.63116	145.457	0.90068
KO:K00340	nuoK; NADH-quinone oxidoreductase subunit K [EC:1.6.5.3]	235.275	358.027	-0.605719	122.752	0.66681		235.275	461.131	-0.970828	225.856	0.790309		358.027	461.131	-0.36511	103.104	0.609062			KO:K01686	uxuA; mannonate dehydratase [EC:4.2.1.8]	26.415	5.77146	2.19435	20.6435	0.838118		26.415	0.0187795	10.458	26.3962	0.99056		5.77146	0.0187795	8.26364	5.75268	0.766729
KO:K00341	nuoL; NADH-quinone oxidoreductase subunit L [EC:1.6.5.3]	353.935	547.138	-0.628422	193.203	0.670968		353.935	764.32	-1.11069	410.385	0.836389		547.138	764.32	-0.482272	217.182	0.668769			KO:K01702	LEU1; 3-isopropylmalate dehydratase [EC:4.2.1.33]	0.0284763	7.54705	-8.05001	7.51858	0.857626		0.0187795	212.306	-13.4647	212.288	1		7.54705	212.306	-4.81409	204.759	0.902767
KO:K00342	nuoM; NADH-quinone oxidoreductase subunit M [EC:1.6.5.3]	458.33	519.622	-0.181076	61.292	0.407129		458.33	975.264	-1.08941	516.934	0.835563		519.622	975.264	-0.90833	455.642	0.791735			KO:K01740	metY; O-acetylhomoserine (thiol)-lyase [EC:2.5.1.49]	254.503	49.0533	2.37526	205.449	0.860479		254.503	0.0187795	13.7262	254.484	1		49.0533	0.0187795	11.351	49.0345	0.999086
KO:K00343	nuoN; NADH-quinone oxidoreductase subunit N [EC:1.6.5.3]	286.99	361.105	-0.331421	74.1156	0.52016		286.99	314.503	-0.132078	27.5139	0.444292		361.105	314.503	0.199343	46.6017	0.480692			KO:K01741	E4.2.99.18; DNA-(apurinic or apyrimidinic site) lyase [EC:4.2.99.18]	0.419163	2.92364	-2.80218	2.50447	0.496611		0.419163	78.747	-7.55357	78.3278	0.994052		2.92364	78.747	-4.75139	75.8234	0.902591
KO:K00344	qor, CRYZ; NADPH2:quinone reductase [EC:1.6.5.5]	181.591	102.974	0.818407	78.6167	0.718787		181.591	71.2798	1.34913	110.311	0.853993		102.974	71.2798	0.530721	31.6946	0.688593			KO:K01744	aspA; aspartate ammonia-lyase [EC:4.3.1.1]	118.952	73.6515	0.69159	45.3003	0.68582		118.952	1.74912	6.0876	117.203	0.967813		73.6515	1.74912	5.39601	71.9024	0.902497
KO:K00346	nqrA; Na+-transporting NADH:ubiquinone oxidoreductase subunit A [EC:1.6.5.8]	0.124774	0.558039	-2.16105	0.433265	0.2862		0.124774	0.0187795	2.73209	0.105994	0.348547		0.558039	0.0187795	4.89314	0.539259	0.308921			KO:K01746	E4.3.1.4; formiminotetrahydrofolate cyclodeaminase [EC:4.3.1.4]	6.59512	13.0263	-0.981958	6.43119	0.589053		6.59512	0.0187795	8.4561	6.57634	0.826406		13.0263	0.0187795	9.43805	13.0075	0.935135
KO:K00347	nqrB; Na+-transporting NADH:ubiquinone oxidoreductase subunit B [EC:1.6.5.8]	12.2896	12.7436	-0.0523379	0.454026	0.2862		12.2896	0.0187795	9.35406	12.2708	0.93317		12.7436	0.0187795	9.4064	12.7248	0.924912			KO:K01752	E4.3.1.17, sdaA, sdaB, tdcG; L-serine dehydratase [EC:4.3.1.17]	46.2251	38.7265	0.255352	7.49851	0.449182		46.2251	0.132201	8.4498	46.0928	0.998631		38.7265	0.132201	8.19444	38.5943	0.99653
KO:K00348	nqrC; Na+-transporting NADH:ubiquinone oxidoreductase subunit C [EC:1.6.5.8]	1.98201	3.78963	-0.935096	1.80763	0.377074		1.98201	0.0187795	6.72166	1.96323	0.524096		3.78963	0.0187795	7.65676	3.77085	0.663283			KO:K01759	GLO1, gloA; lactoylglutathione lyase [EC:4.4.1.5]	35.129	12.0662	1.54169	23.0627	0.806311		35.129	0.314667	6.80269	34.8143	0.983138		12.0662	0.314667	5.26101	11.7516	0.815076
KO:K00349	nqrD; Na+-transporting NADH:ubiquinone oxidoreductase subunit D [EC:1.6.5.8]	2.19951	4.62713	-1.07294	2.42762	0.480649		2.19951	0.0187795	6.87188	2.18073	0.624409		4.62713	0.0187795	7.94482	4.60835	0.721208			KO:K01779	racD; aspartate racemase [EC:5.1.1.13]	27.8134	29.0538	-0.0629469	1.2404	0.30373		27.8134	0.0187795	10.5324	27.7947	0.991846		29.0538	0.0187795	10.5954	29.0351	0.992333
KO:K00350	nqrE; Na+-transporting NADH:ubiquinone oxidoreductase subunit E [EC:1.6.5.8]	12.2249	12.1951	0.00352464	0.0298301	0.2862		12.2249	0.0187795	9.34645	12.2061	0.93317		12.1951	0.0187795	9.34293	12.1763	0.924912			KO:K01785	galM, GALM; aldose 1-epimerase [EC:5.1.3.3]	47.983	8.97884	2.41792	39.0042	0.859086		47.983	0.0187795	11.3192	47.9642	0.999195		8.97884	0.0187795	8.90123	8.96006	0.858335
KO:K00351	nqrF; Na+-transporting NADH:ubiquinone oxidoreductase subunit F [EC:1.6.5.8]	19.1243	15.2201	0.329424	3.90414	0.41828		19.1243	0.0187795	9.99203	19.1055	0.976301		15.2201	0.0187795	9.66261	15.2013	0.951864			KO:K01787	RENBP; N-acylglucosamine 2-epimerase [EC:5.1.3.8]	21.0404	0.0284763	9.52918	21.0119	0.984681		21.0404	0.0187795	10.1298	21.0216	0.982218		NA	NA	NA	NA	NA
KO:K00354	E1.6.99.1; NADPH2 dehydrogenase [EC:1.6.99.1]	1.4823	2.30975	-0.639903	0.827456	0.2862		1.4823	0.0187795	6.30254	1.46352	0.524096		2.30975	0.0187795	6.94244	2.29098	0.588898			KO:K01788	nanE; N-acylglucosamine-6-phosphate 2-epimerase [EC:5.1.3.9]	11.0493	2.00226	2.46426	9.04705	0.761346		11.0493	0.0187795	9.20058	11.0305	0.921984		2.00226	0.0187795	6.73633	1.98348	0.503587
KO:K00355	NQO1; NAD(P)H dehydrogenase (quinone) [EC:1.6.5.2]	14.2293	4.42622	1.68471	9.80304	0.742618		14.2293	0.0187795	9.56549	14.2105	0.950951		4.42622	0.0187795	7.88078	4.40744	0.721208			KO:K01810	GPI, pgi; glucose-6-phosphate isomerase [EC:5.3.1.9]	118.906	41.3542	1.52372	77.5519	0.817696		118.906	0.0187795	12.6284	118.887	1		41.3542	0.0187795	11.1047	41.3354	0.998159
KO:K00356	E1.6.99.3; NADH dehydrogenase [EC:1.6.99.3]	80.4773	53.3537	0.592995	27.1237	0.660255		80.4773	41.0116	0.972552	39.4658	0.788271		53.3537	41.0116	0.379557	12.3421	0.582825			KO:K01812	uxaC; glucuronate isomerase [EC:5.3.1.12]	14.8057	9.27016	0.675488	5.53555	0.54103		14.8057	0.0187795	9.62278	14.7869	0.950951		9.27016	0.0187795	8.94729	9.25138	0.879086
KO:K00362	nirB; nitrite reductase (NADH) large subunit [EC:1.7.1.15]	20.0533	59.6002	-1.57148	39.5469	0.816303		20.0533	0.086423	7.85821	19.9669	0.973772		59.6002	0.086423	9.42969	59.5138	0.999461			KO:K01813	rhaA; L-rhamnose isomerase [EC:5.3.1.14]	30.0503	0.0284763	10.0434	30.0218	0.995686		30.0503	0.0187795	10.644	30.0315	0.994428		NA	NA	NA	NA	NA
KO:K00363	nirD; nitrite reductase (NADH) small subunit [EC:1.7.1.15]	33.5621	42.2654	-0.332645	8.70331	0.487398		33.5621	5.40709	2.63391	28.155	0.888783		42.2654	5.40709	2.96655	36.8583	0.898453			KO:K01821	praC, xylH; 4-oxalocrotonate tautomerase [EC:5.3.2.6]	42.7433	72.6212	-0.764693	29.8779	0.70185		42.7433	2.06174	4.37376	40.6815	0.896184		72.6212	2.06174	5.13845	70.5594	0.902485
KO:K00364	E1.7.1.7, guaC; GMP reductase [EC:1.7.1.7]	0.338483	0.0284763	3.57125	0.310007	0.2862		0.338483	0.0187795	4.17185	0.319704	0.348547		NA	NA	NA	NA	NA			KO:K01835	pgm; phosphoglucomutase [EC:5.4.2.2]	92.7674	20.6344	2.16857	72.133	0.855853		92.7674	0.0187795	12.2702	92.7486	0.999937		20.6344	0.0187795	10.1017	20.6156	0.975733
KO:K00366	nirA; ferredoxin-nitrite reductase [EC:1.7.7.1]	56.0933	105.399	-0.909955	49.3052	0.730405		56.0933	114.488	-1.0293	58.3951	0.833222		105.399	114.488	-0.119346	9.08984	0.401993			KO:K01847	MUT; methylmalonyl-CoA mutase [EC:5.4.99.2]	81.2503	1.11367	6.18898	80.1366	0.982918		81.2503	0.0187795	12.079	81.2315	0.999843		1.11367	0.0187795	5.89003	1.09489	0.482345
KO:K00367	narB; ferredoxin-nitrate reductase [EC:1.7.7.2]	14.6785	5.84122	1.32936	8.83724	0.698656		14.6785	0.180757	6.34351	14.4977	0.918764		5.84122	0.180757	5.01415	5.66046	0.67041			KO:K01850	E5.4.99.5; chorismate mutase [EC:5.4.99.5]	12.0095	0.0284763	8.72019	11.981	0.927279		12.0095	0.0187795	9.3208	11.9907	0.921995		NA	NA	NA	NA	NA
KO:K00368	nirK; nitrite reductase (NO-forming) [EC:1.7.2.1]	34.3968	116.176	-1.75597	81.7792	0.841644		34.3968	74.9006	-1.1227	40.5038	0.835271		116.176	74.9006	0.633263	41.2754	0.735299			KO:K01851	pchA; salicylate biosynthesis isochorismate synthase [EC:5.4.4.2]	17.4945	1.36179	3.68333	16.1328	0.832236		17.4945	0.0187795	9.86353	17.4758	0.968085		1.36179	0.0187795	6.1802	1.34301	0.482345
KO:K00370	narG, narZ, nxrA; nitrate reductase / nitrite oxidoreductase, alpha subunit [EC:1.7.5.1 1.7.99.-]	54.8831	78.3487	-0.513548	23.4656	0.611083		54.8831	18.1816	1.59388	36.7014	0.872653		78.3487	18.1816	2.10743	60.1671	0.893669			KO:K01854	glf; UDP-galactopyranose mutase [EC:5.4.99.9]	20.96	11.7192	0.838762	9.24077	0.636852		20.96	0.248824	6.39637	20.7112	0.947428		11.7192	0.248824	5.5576	11.4704	0.815076
KO:K00371	narH, narY, nxrB; nitrate reductase / nitrite oxidoreductase, beta subunit [EC:1.7.5.1 1.7.99.-]	29.8955	63.6431	-1.09008	33.7477	0.786755		29.8955	17.9176	0.73855	11.9779	0.699833		63.6431	17.9176	1.82863	45.7255	0.884396			KO:K01857	pcaB; 3-carboxy-cis,cis-muconate cycloisomerase [EC:5.5.1.2]	19.8986	1.10837	4.16615	18.7902	0.841225		19.8986	0.0187795	10.0493	19.8798	0.976301		1.10837	0.0187795	5.88314	1.08959	0.482345
KO:K00372	nasA; assimilatory nitrate reductase catalytic subunit [EC:1.7.99.-]	3.3965	8.97519	-1.40189	5.57869	0.622556		3.3965	0.0187795	7.49875	3.37773	0.695944		8.97519	0.0187795	8.90064	8.95641	0.858335			KO:K01886	QARS, glnS; glutaminyl-tRNA synthetase [EC:6.1.1.18]	79.5563	16.2681	2.28993	63.2882	0.855834		79.5563	0.0187795	12.0486	79.5375	0.999843		16.2681	0.0187795	9.75868	16.2493	0.958511
KO:K00373	narJ, narW; nitrate reductase molybdenum cofactor assembly chaperone NarJ/NarW	8.03649	4.63507	0.793976	3.40143	0.488099		8.03649	2.59829	1.629	5.4382	0.67627		4.63507	2.59829	0.835026	2.03677	0.461172			KO:K01908	prpE; propionyl-CoA synthetase [EC:6.2.1.17]	31.2083	10.2303	1.60907	20.9779	0.822458		31.2083	0.0187795	10.6986	31.1895	0.994982		10.2303	0.0187795	9.08948	10.2116	0.89687
KO:K00374	narI, narV; nitrate reductase gamma subunit [EC:1.7.5.1 1.7.99.-]	12.383	13.3926	-0.113079	1.00963	0.315115		12.383	7.90743	0.647076	4.47554	0.560349		13.3926	7.90743	0.760155	5.48517	0.583165			KO:K01911	menE; O-succinylbenzoic acid---CoA ligase [EC:6.2.1.26]	70.7336	16.4764	2.10199	54.2572	0.854646		70.7336	0.0187795	11.879	70.7148	0.999791		16.4764	0.0187795	9.77703	16.4576	0.958511
KO:K00375	K00375; GntR family transcriptional regulator / MocR family aminotransferase	6.46258	10.3898	-0.68498	3.92718	0.480629		6.46258	0.0187795	8.42681	6.4438	0.826406		10.3898	0.0187795	9.11179	10.371	0.89687			KO:K01920	gshB; glutathione synthase [EC:6.3.2.3]	54.79	0.97469	5.81283	53.8153	0.955434		54.79	0.0187795	11.5105	54.7712	0.999519		0.97469	0.0187795	5.69771	0.95591	0.308921
KO:K00376	nosZ; nitrous-oxide reductase [EC:1.7.2.4]	85.7786	181.623	-1.08225	95.8441	0.789258		85.7786	342.396	-1.99698	256.618	0.888344		181.623	342.396	-0.914723	160.774	0.791735			KO:K01922	PPCS, COAB; phosphopantothenate---cysteine ligase (ATP) [EC:6.3.2.51]	2.56649	11.3035	-2.1389	8.73698	0.736959		2.56649	0.0187795	7.0945	2.54771	0.624409		11.3035	0.0187795	9.23339	11.2847	0.912298
KO:K00380	cysJ; sulfite reductase (NADPH) flavoprotein alpha-component [EC:1.8.1.2]	5.20351	4.67446	0.154686	0.529052	0.2862		5.20351	0.0187795	8.11418	5.18473	0.792714		4.67446	0.0187795	7.9595	4.65568	0.721208			KO:K01926	rex; redox-sensing transcriptional repressor	132.833	97.2801	0.449398	35.553	0.587797		132.833	16.0658	3.04755	116.767	0.897585		97.2801	16.0658	2.59816	81.2144	0.900563
KO:K00381	cysI; sulfite reductase (NADPH) hemoprotein beta-component [EC:1.8.1.2]	9.31543	4.43172	1.07175	4.88371	0.576938		9.31543	0.0187795	8.95432	9.29665	0.893038		4.43172	0.0187795	7.88257	4.41294	0.721208			KO:K01938	fhs; formate--tetrahydrofolate ligase [EC:6.3.4.3]	108.945	155.602	-0.514258	46.6567	0.615826		108.945	0.0187795	12.5022	108.926	0.999979		155.602	0.0187795	13.0164	155.583	1
KO:K00382	DLD, lpd, pdhD; dihydrolipoamide dehydrogenase [EC:1.8.1.4]	368.117	332.013	0.148926	36.1044	0.384914		368.117	614.666	-0.739639	246.549	0.76475		332.013	614.666	-0.888565	282.654	0.790281			KO:K01941	E6.3.4.6; urea carboxylase [EC:6.3.4.6]	15.8047	7.56623	1.0627	8.23844	0.680843		15.8047	0.0187795	9.71698	15.7859	0.957359		7.56623	0.0187795	8.65427	7.54745	0.833798
KO:K00383	GSR, gor; glutathione reductase (NADPH) [EC:1.8.1.7]	1.70172	0.393922	2.11101	1.3078	0.404723		1.70172	0.0187795	6.50169	1.68294	0.524096		0.393922	0.0187795	4.39068	0.375142	0.308921			KO:K01958	PC, pyc; pyruvate carboxylase [EC:6.4.1.1]	12.5771	12.5094	0.00777857	0.0676293	0.2862		12.5771	0.0187795	9.38742	12.5583	0.93317		12.5094	0.0187795	9.37965	12.4907	0.924912
KO:K00384	trxB, TRR; thioredoxin reductase (NADPH) [EC:1.8.1.9]	660.215	654.237	0.0131225	5.97797	0.286852		660.215	717.326	-0.119692	57.1107	0.434947		654.237	717.326	-0.132815	63.0887	0.415287			KO:K01960	pycB; pyruvate carboxylase subunit B [EC:6.4.1.1]	40.4612	70.8343	-0.807908	30.3731	0.71457		40.4612	11.1787	1.85579	29.2826	0.872779		70.8343	11.1787	2.6637	59.6557	0.900176
KO:K00387	SUOX; sulfite oxidase [EC:1.8.3.1]	8.54101	0.453403	4.23554	8.0876	0.746494		8.54101	0.0187795	8.82911	8.52223	0.87488		0.453403	0.0187795	4.59357	0.434624	0.308921			KO:K01989	ABC.X4.S; putative ABC transport system substrate-binding protein	57.1563	55.7088	0.0370075	1.44751	0.297361		57.1563	0.0187795	11.5715	57.1375	0.999571		55.7088	0.0187795	11.5345	55.69	0.999343
KO:K00389	yidH; putative membrane protein	33.2067	3.23111	3.36137	29.9756	0.860995		33.2067	0.0187795	10.7881	33.188	0.995902		3.23111	0.0187795	7.42673	3.21233	0.663283			KO:K01991	ABC-2.OM, wza; polysaccharide biosynthesis/export protein	130.488	126.318	0.0468563	4.16994	0.3071		130.488	18.2024	2.84172	112.286	0.897209		126.318	18.2024	2.79486	108.116	0.900774
KO:K00390	cysH; phosphoadenosine phosphosulfate reductase [EC:1.8.4.8 1.8.4.10]	100.458	125.918	-0.325901	25.4607	0.518757		100.458	88.2717	0.186566	12.186	0.491585		125.918	88.2717	0.512466	37.6467	0.685416			KO:K02009	cbiN; cobalt/nickel transport protein	52.2968	23.8547	1.13245	28.4421	0.786521		52.2968	0.523831	6.64148	51.773	0.967228		23.8547	0.523831	5.50903	23.3309	0.88653
KO:K00392	sir; sulfite reductase (ferredoxin) [EC:1.8.7.1]	81.9704	58.3779	0.489682	23.5925	0.602659		81.9704	51.9828	0.657069	29.9876	0.737476		58.3779	51.9828	0.167388	6.39509	0.433646			KO:K02014	TC.FEV.OM; iron complex outermembrane recepter protein	196.827	259.236	-0.397339	62.4093	0.554149		196.827	38.6347	2.34896	158.192	0.893592		259.236	38.6347	2.7463	220.602	0.900797
KO:K00394	aprA; adenylylsulfate reductase, subunit A [EC:1.8.99.2]	19.0753	16.2376	0.232372	2.83775	0.367092		19.0753	3.29845	2.53185	15.7769	0.851181		16.2376	3.29845	2.29948	12.9391	0.820234			KO:K02019	modE; molybdate transport system regulatory protein	10.2315	38.5804	-1.91485	28.3489	0.839307		10.2315	262.106	-4.67906	251.874	0.898035		38.5804	262.106	-2.76421	223.525	0.900797
KO:K00395	aprB; adenylylsulfate reductase, subunit B [EC:1.8.99.2]	10.0532	12.911	-0.360949	2.85783	0.393689		10.0532	6.21742	0.693265	3.83577	0.529668		12.911	6.21742	1.05421	6.6936	0.662309			KO:K02022	ABC.MR.TX; HlyD family secretion protein	58.0528	4.64932	3.64227	53.4034	0.865553		58.0528	0.0187795	11.594	58.034	0.999592		4.64932	0.0187795	7.95172	4.63054	0.721208
KO:K00399	mcrA; methyl-coenzyme M reductase alpha subunit [EC:2.8.4.1]	0.273131	2.42769	-3.15192	2.15456	0.496611		0.273131	0.0187795	3.86236	0.254351	0.348547		2.42769	0.0187795	7.01428	2.40891	0.588898			KO:K02045	cysA; sulfate transport system ATP-binding protein [EC:3.6.3.25]	60.8701	7.15538	3.08863	53.7147	0.865095		60.8701	0.0187795	11.6624	60.8513	0.999624		7.15538	0.0187795	8.57373	7.1366	0.833798
KO:K00400	K00400; methyl coenzyme M reductase system, component A2	0.0780792	2.43588	-4.96336	2.3578	0.496611		0.0780792	0.0187795	2.05578	0.0592997	0.348547		2.43588	0.0187795	7.01914	2.4171	0.588898			KO:K02046	cysU; sulfate transport system permease protein	36.0394	0.179581	7.64879	35.8598	0.996397		36.0394	0.0187795	10.9062	36.0206	0.997198		0.179581	0.0187795	3.25741	0.160802	0.308921
KO:K00401	mcrB; methyl-coenzyme M reductase beta subunit [EC:2.8.4.1]	0.0748635	1.12811	-3.9135	1.05325	0.404723		0.0748635	0.0187795	1.99511	0.056084	0.348547		1.12811	0.0187795	5.90861	1.10933	0.482345			KO:K02047	cysW; sulfate transport system permease protein	37.595	0.179581	7.70976	37.4154	0.996952		37.595	0.0187795	10.9672	37.5762	0.997407		0.179581	0.0187795	3.25741	0.160802	0.308921
KO:K00402	mcrG; methyl-coenzyme M reductase gamma subunit [EC:2.8.4.1]	0.0935804	1.12811	-3.59156	1.03453	0.404723		0.0935804	0.0187795	2.31705	0.074801	0.348547		1.12811	0.0187795	5.90861	1.10933	0.482345			KO:K02048	cysP, sbp; sulfate transport system substrate-binding protein	45.9049	0.0284763	10.6547	45.8765	0.999143		45.9049	0.0187795	11.2553	45.8862	0.999049		NA	NA	NA	NA	NA
KO:K00404	ccoN; cytochrome c oxidase cbb3-type subunit I [EC:1.9.3.1]	25.1649	23.9458	0.0716362	1.21903	0.306486		25.1649	0.0187795	10.388	25.1461	0.989233		23.9458	0.0187795	10.3164	23.9271	0.983763			KO:K02067	mlaD, linM; phospholipid/cholesterol/gamma-HCH transport system substrate-binding protein	106.511	63.1304	0.754601	43.381	0.704032		106.511	5.09761	4.38504	101.414	0.897982		63.1304	5.09761	3.63044	58.0328	0.902181
KO:K00405	ccoO; cytochrome c oxidase cbb3-type subunit II	15.2545	41.667	-1.44967	26.4125	0.80858		15.2545	0.0992413	7.26408	15.1552	0.94402		41.667	0.0992413	8.71375	41.5677	0.998007			KO:K02092	apcA; allophycocyanin alpha subunit	34.2779	0.0284763	10.2333	34.2494	0.997302		34.2779	0.0187795	10.8339	34.2591	0.996477		NA	NA	NA	NA	NA
KO:K00406	ccoP; cytochrome c oxidase cbb3-type subunit III	15.0599	8.35657	0.849729	6.70333	0.585859		15.0599	0.155476	6.59788	14.9044	0.918764		8.35657	0.155476	5.74815	8.2011	0.824771			KO:K02093	apcB; allophycocyanin beta subunit	61.8082	0.0284763	11.0838	61.7798	0.999815		61.8082	0.0187795	11.6844	61.7895	0.999665		NA	NA	NA	NA	NA
KO:K00407	ccoQ; cytochrome c oxidase cbb3-type subunit IV	1.04536	0.110143	3.24655	0.935218	0.2862		1.04536	0.0187795	5.7987	1.02658	0.524096		0.110143	0.0187795	2.55215	0.0913635	0.308921			KO:K02094	apcC; phycobilisome core linker protein	37.4127	0.0284763	10.3596	37.3843	0.998208		37.4127	0.0187795	10.9602	37.394	0.997407		NA	NA	NA	NA	NA
KO:K00410	fbcH; ubiquinol-cytochrome c reductase cytochrome b/c1 subunit	0.241356	0.0284763	3.08333	0.21288	0.2862		0.241356	0.0187795	3.68393	0.222577	0.348547		NA	NA	NA	NA	NA			KO:K02095	apcD; allophycocyanin-B	69.9103	0.0284763	11.2615	69.8819	0.999912		69.9103	0.0187795	11.8621	69.8916	0.99977		NA	NA	NA	NA	NA
KO:K00411	UQCRFS1, RIP1, petA; ubiquinol-cytochrome c reductase iron-sulfur subunit [EC:1.10.2.2]	14.0542	63.7428	-2.18126	49.6886	0.855356		14.0542	11.1353	0.33586	2.91889	0.448976		63.7428	11.1353	2.51712	52.6075	0.898359			KO:K02096	apcE; phycobilisome core-membrane linker protein	59.3746	0.11447	9.01873	59.2601	0.999786		59.3746	0.0187795	11.6265	59.3558	0.999603		0.11447	0.0187795	2.60774	0.0956904	0.308921
KO:K00412	CYTB, petB; ubiquinol-cytochrome c reductase cytochrome b subunit	53.1896	112.964	-1.08665	59.7744	0.789521		53.1896	323.6	-2.60499	270.41	0.895934		112.964	323.6	-1.51835	210.636	0.865721			KO:K02097	apcF; phycobilisome core component	35.2435	0.0284763	10.2734	35.215	0.997653		35.2435	0.0187795	10.874	35.2247	0.996843		NA	NA	NA	NA	NA
KO:K00413	CYC1, CYT1, petC; ubiquinol-cytochrome c reductase cytochrome c1 subunit	4.35792	10.3322	-1.24544	5.97429	0.616186		4.35792	5.05086	-0.212892	0.692948	0.348547		10.3322	5.05086	1.03255	5.28134	0.63109			KO:K02099	araC; AraC family transcriptional regulator, arabinose operon regulatory protein	12.3816	0.742235	4.06017	11.6393	0.793202		12.3816	0.0187795	9.36482	12.3628	0.93317		0.742235	0.0187795	5.30465	0.723456	0.308921
KO:K00425	cydA; cytochrome d ubiquinol oxidase subunit I [EC:1.10.3.14]	130.401	32.8259	1.99004	97.5748	0.844975		130.401	82.3259	0.663534	48.0748	0.742139		32.8259	82.3259	-1.32651	49.4999	0.859742			KO:K02107	ATPVG, ahaH, atpH; V/A-type H+/Na+-transporting ATPase subunit G/H	14.0868	45.8453	-1.70243	31.7585	0.837125		14.0868	1.97394	2.83519	12.1128	0.830452		45.8453	1.97394	4.53762	43.8714	0.901219
KO:K00426	cydB; cytochrome d ubiquinol oxidase subunit II [EC:1.10.3.14]	90.5149	12.5324	2.8525	77.9826	0.864774		90.5149	0.0187795	12.2348	90.4961	0.999906		12.5324	0.0187795	9.38229	12.5136	0.924912			KO:K02137	ATPeF0O, ATP5O, ATP5; F-type H+-transporting ATPase subunit O	0.696362	32.4608	-5.54272	31.7644	0.951996		0.696362	57.1457	-6.35866	56.4493	0.967374		32.4608	57.1457	-0.815947	24.6849	0.767761
KO:K00428	E1.11.1.5; cytochrome c peroxidase [EC:1.11.1.5]	90.3217	58.6253	0.623548	31.6963	0.666352		90.3217	16.2174	2.47753	74.1043	0.893602		58.6253	16.2174	1.85398	42.408	0.884162			KO:K02164	norE; nitric oxide reductase NorE protein	1.99033	12.1811	-2.61356	10.1907	0.77872		1.99033	0.0187795	6.72771	1.97155	0.524096		12.1811	0.0187795	9.34127	12.1623	0.924912
KO:K00432	gpx; glutathione peroxidase [EC:1.11.1.9]	49.9896	0.235451	7.73005	49.7541	0.998753		49.9896	0.0187795	11.3783	49.9708	0.999289		0.235451	0.0187795	3.6482	0.216672	0.308921			KO:K02182	caiC; carnitine-CoA ligase [EC:6.2.1.48]	16.5409	10.0861	0.713668	6.4548	0.565504		16.5409	0.0187795	9.78267	16.5221	0.963255		10.0861	0.0187795	9.069	10.0673	0.89687
KO:K00433	cpo; non-heme chloroperoxidase [EC:1.11.1.10]	2.92263	1.35659	1.10728	1.56604	0.404723		2.92263	0.601578	2.28044	2.32105	0.535783		1.35659	0.601578	1.17316	0.755009	0.308921			KO:K02203	thrH; phosphoserine / homoserine phosphotransferase [EC:3.1.3.3 2.7.1.39]	21.5548	2.40606	3.16327	19.1488	0.844624		21.5548	0.0187795	10.1646	21.5361	0.982218		2.40606	0.0187795	7.00137	2.38728	0.588898
KO:K00435	hemQ; Fe-coproporphyrin III decarboxylase [EC:1.11.1.-]	0.493585	0.0284763	4.11546	0.465109	0.2862		0.493585	0.0187795	4.71607	0.474805	0.348547		NA	NA	NA	NA	NA			KO:K02204	thrB2; homoserine kinase type II [EC:2.7.1.39]	44.6867	1.1682	5.25749	43.5185	0.954743		44.6867	0.0187795	11.2165	44.6679	0.998902		1.1682	0.0187795	5.95898	1.14942	0.482345
KO:K00436	hoxH; NAD-reducing hydrogenase large subunit [EC:1.12.1.2]	88.2887	74.2551	0.249739	14.0336	0.45523		88.2887	174.772	-0.985172	86.4831	0.790226		74.2551	174.772	-1.23491	100.517	0.851594			KO:K02217	ftnA, ftn; ferritin [EC:1.16.3.2]	88.7035	84.0727	0.0773542	4.63083	0.327376		88.7035	13.8821	2.67577	74.8214	0.895756		84.0727	13.8821	2.59841	70.1906	0.900399
KO:K00437	hydB; [NiFe] hydrogenase large subunit [EC:1.12.2.1]	38.8443	37.9346	0.0341893	0.909718	0.2862		38.8443	0.0187795	11.0143	38.8255	0.997669		37.9346	0.0187795	10.9801	37.9158	0.99721			KO:K02230	cobN; cobaltochelatase CobN [EC:6.6.1.2]	156.798	35.6224	2.13805	121.175	0.85521		156.798	0.0187795	13.0275	156.779	1		35.6224	0.0187795	10.8894	35.6036	0.996272
KO:K00441	frhB; coenzyme F420 hydrogenase subunit beta [EC:1.12.98.1]	64.8864	36.6583	0.823776	28.2281	0.714151		64.8864	38.3722	0.757854	26.5142	0.75761		36.6583	38.3722	-0.0659216	1.7139	0.334091			KO:K02234	cobW; cobalamin biosynthesis protein CobW	32.3223	2.04642	3.98135	30.2759	0.861599		32.3223	0.0187795	10.7492	32.3035	0.995463		2.04642	0.0187795	6.7678	2.02765	0.588898
KO:K00442	frhD; coenzyme F420 hydrogenase subunit delta	0.983908	2.66973	-1.4401	1.68582	0.404723		0.983908	0.0187795	5.71129	0.965128	0.348547		2.66973	0.0187795	7.15139	2.65095	0.588898			KO:K02241	comFB; competence protein ComFB	19.1011	0.456229	5.38775	18.6449	0.931097		19.1011	0.0187795	9.99028	19.0823	0.976301		0.456229	0.0187795	4.60253	0.437449	0.308921
KO:K00446	dmpB, xylE; catechol 2,3-dioxygenase [EC:1.13.11.2]	100.28	108.067	-0.107903	7.78778	0.349932		100.28	56.5093	0.82747	43.7704	0.776981		108.067	56.5093	0.935373	51.5582	0.793576			KO:K02242	comFC; competence protein ComFC	29.2514	25.7029	0.186572	3.54846	0.376432		29.2514	0.0187795	10.6051	29.2326	0.993749		25.7029	0.0187795	10.4186	25.6841	0.987702
KO:K00448	pcaG; protocatechuate 3,4-dioxygenase, alpha subunit [EC:1.13.11.3]	0.93191	0.182861	2.34944	0.749049	0.2862		0.93191	0.0187795	5.63296	0.913131	0.348547		0.182861	0.0187795	3.28352	0.164082	0.308921			KO:K02245	comGC; competence protein ComGC	52.3685	19.0948	1.45552	33.2738	0.813742		52.3685	0.0187795	11.4453	52.3498	0.999446		19.0948	0.0187795	9.98981	19.076	0.972438
KO:K00449	pcaH; protocatechuate 3,4-dioxygenase, beta subunit [EC:1.13.11.3]	6.84831	13.1092	-0.936755	6.26085	0.589053		6.84831	0.0187795	8.51045	6.82953	0.826406		13.1092	0.0187795	9.4472	13.0904	0.935135			KO:K02279	cpaB, rcpC; pilus assembly protein CpaB	66.3558	41.0584	0.692546	25.2974	0.68058		66.3558	2.33203	4.83057	64.0238	0.897763		41.0584	2.33203	4.13802	38.7264	0.900211
KO:K00450	E1.13.11.4; gentisate 1,2-dioxygenase [EC:1.13.11.4]	1.50466	4.19085	-1.47781	2.68619	0.480649		1.50466	2.43034	-0.691722	0.92568	0.348547		4.19085	2.43034	0.786088	1.76051	0.396565			KO:K02284	cpcA; phycocyanin alpha chain	61.2567	0.0284763	11.0709	61.2282	0.999815		61.2567	0.0187795	11.6715	61.2379	0.999665		NA	NA	NA	NA	NA
KO:K00451	HGD, hmgA; homogentisate 1,2-dioxygenase [EC:1.13.11.5]	85.4852	53.1554	0.685458	32.3298	0.684038		85.4852	0.316779	8.07605	85.1684	0.998965		53.1554	0.316779	7.39059	52.8386	0.993705			KO:K02285	cpcB; phycocyanin beta chain	61.7467	0.0284763	11.0824	61.7182	0.999815		61.7467	0.0187795	11.683	61.7279	0.999665		NA	NA	NA	NA	NA
KO:K00452	HAAO; 3-hydroxyanthranilate 3,4-dioxygenase [EC:1.13.11.6]	3.93467	17.3462	-2.14031	13.4116	0.802045		3.93467	0.0187795	7.71094	3.91589	0.695944		17.3462	0.0187795	9.85125	17.3275	0.963669			KO:K02286	cpcC; phycocyanin-associated rod linker protein	46.5361	0.0284763	10.6744	46.5076	0.99925		46.5361	0.0187795	11.275	46.5173	0.999091		NA	NA	NA	NA	NA
KO:K00453	TDO2, kynA; tryptophan 2,3-dioxygenase [EC:1.13.11.11]	17.2046	27.8132	-0.692974	10.6086	0.623081		17.2046	0.0187795	9.83942	17.1858	0.968085		27.8132	0.0187795	10.5324	27.7944	0.990199			KO:K02287	cpcD; phycocyanin-associated, rod	61.4469	0.0284763	11.0754	61.4185	0.999815		61.4469	0.0187795	11.676	61.4282	0.999665		NA	NA	NA	NA	NA
KO:K00454	LOX2S; lipoxygenase [EC:1.13.11.12]	2.38995	0.0284763	6.39108	2.36148	0.613664		2.38995	0.0187795	6.99168	2.37117	0.624409		NA	NA	NA	NA	NA			KO:K02288	cpcE; phycocyanobilin lyase subunit alpha [EC:4.4.1.32]	66.9138	1.05897	5.98156	65.8548	0.955639		66.9138	0.0187795	11.7989	66.895	0.99976		1.05897	0.0187795	5.81737	1.04019	0.482345
KO:K00455	hpaD, hpcB; 3,4-dihydroxyphenylacetate 2,3-dioxygenase [EC:1.13.11.15]	0.0284763	0.171168	-2.58758	0.142692	0.2862		NA	NA	NA	NA	NA		0.171168	0.0187795	3.18818	0.152388	0.308921			KO:K02289	cpcF; phycocyanobilin lyase subunit beta [EC:4.4.1.32]	33.5641	1.05936	4.98565	32.5048	0.862495		33.5641	43.4966	-0.373981	9.93243	0.571765		1.05936	43.4966	-5.35963	42.4372	0.901114
KO:K00456	CDO1; cysteine dioxygenase [EC:1.13.11.20]	1.49486	0.0284763	5.7141	1.46638	0.494595		1.49486	0.0187795	6.31471	1.47608	0.524096		NA	NA	NA	NA	NA			KO:K02290	cpcG; phycobilisome rod-core linker protein	57.9372	0.0284763	10.9905	57.9088	0.999757		57.9372	0.0187795	11.5911	57.9185	0.999571		NA	NA	NA	NA	NA
KO:K00457	HPD, hppD; 4-hydroxyphenylpyruvate dioxygenase [EC:1.13.11.27]	107.65	40.8541	1.39779	66.7956	0.812885		107.65	0.0187795	12.4849	107.631	0.999969		40.8541	0.0187795	11.0871	40.8353	0.997948			KO:K02293	PDS, crtP; 15-cis-phytoene desaturase [EC:1.3.5.5]	47.6939	0.0284763	10.7098	47.6655	0.999309		47.6939	0.0187795	11.3104	47.6752	0.999195		NA	NA	NA	NA	NA
KO:K00459	ncd2, npd; nitronate monooxygenase [EC:1.13.12.16]	30.6179	18.7098	0.710586	11.9082	0.634447		30.6179	5.4643	2.48627	25.1536	0.883013		18.7098	5.4643	1.77568	13.2455	0.819097			KO:K02294	crtR; beta-carotene hydroxylase [EC:1.14.13.-]	44.1693	0.0284763	10.5991	44.1408	0.999055		44.1693	0.0187795	11.1997	44.1505	0.998902		NA	NA	NA	NA	NA
KO:K00463	IDO, INDO; indoleamine 2,3-dioxygenase [EC:1.13.11.52]	66.37	4.58965	3.85407	61.7803	0.865728		66.37	0.0187795	11.7872	66.3512	0.99976		4.58965	0.0187795	7.93308	4.57087	0.721208			KO:K02300	cyoD; cytochrome o ubiquinol oxidase subunit IV	23.0213	0.0284763	9.65899	22.9929	0.986745		23.0213	0.0187795	10.2596	23.0026	0.986159		NA	NA	NA	NA	NA
KO:K00464	diox1; all-trans-8'-apo-beta-carotenal 15,15'-oxygenase [EC:1.13.11.75]	33.3647	0.0284763	10.1943	33.3362	0.996932		33.3647	0.0187795	10.795	33.3459	0.995902		NA	NA	NA	NA	NA			KO:K02313	dnaA; chromosomal replication initiator protein	272.217	239.972	0.181892	32.2452	0.407041		272.217	31.4473	3.11375	240.77	0.897596		239.972	31.4473	2.93186	208.525	0.9017
KO:K00467	E1.13.12.4; lactate 2-monooxygenase [EC:1.13.12.4]	3.50172	0.444963	2.97631	3.05675	0.56643		3.50172	0.0187795	7.54276	3.48294	0.695944		0.444963	0.0187795	4.56646	0.426183	0.308921			KO:K02322	DPB1, polD2; DNA polymerase II large subunit [EC:2.7.7.7]	34.0067	70.5341	-1.0525	36.5274	0.786395		34.0067	691.398	-4.34563	657.391	0.898035		70.5341	691.398	-3.29312	620.864	0.902427
KO:K00472	P4HA; prolyl 4-hydroxylase [EC:1.14.11.2]	0.0284763	0.118706	-2.05956	0.0902296	0.2862		NA	NA	NA	NA	NA		0.118706	0.0187795	2.66016	0.0999265	0.308921			KO:K02323	DPB2, polD1; DNA polymerase II small subunit [EC:2.7.7.7]	11.9331	51.3076	-2.10421	39.3746	0.853516		11.9331	510.566	-5.41906	498.633	0.898035		51.3076	510.566	-3.31485	459.259	0.902427
KO:K00477	PHYH; phytanoyl-CoA hydroxylase [EC:1.14.11.18]	6.32279	20.9814	-1.73048	14.6586	0.795306		6.32279	14.523	-1.1997	8.20018	0.722873		20.9814	14.523	0.530772	6.4584	0.565053			KO:K02336	DPO2, polB; DNA polymerase II [EC:2.7.7.7]	14.1548	53.8618	-1.92797	39.707	0.843485		14.1548	406.921	-4.84539	392.767	0.898035		53.8618	406.921	-2.91742	353.06	0.9017
KO:K00479	gbcA; glycine betaine catabolism A	13.6674	9.70471	0.493985	3.96272	0.448461		13.6674	0.0187795	9.50737	13.6487	0.942578		9.70471	0.0187795	9.01339	9.68593	0.879086			KO:K02338	DPO3B, dnaN; DNA polymerase III subunit beta [EC:2.7.7.7]	256.148	276.376	-0.109654	20.2279	0.351237		256.148	36.5383	2.8095	219.61	0.897219		276.376	36.5383	2.91915	239.838	0.9017
KO:K00480	E1.14.13.1; salicylate hydroxylase [EC:1.14.13.1]	0.228633	0.791359	-1.7913	0.562725	0.2862		0.228633	0.0187795	3.60581	0.209854	0.348547		0.791359	0.0187795	5.3971	0.772579	0.308921			KO:K02340	DPO3D1, holA; DNA polymerase III subunit delta [EC:2.7.7.7]	138.454	130.722	0.0828969	7.73126	0.328827		138.454	17.4722	2.98627	120.981	0.89723		130.722	17.4722	2.90337	113.25	0.901665
KO:K00481	pobA; p-hydroxybenzoate 3-monooxygenase [EC:1.14.13.2]	3.308	10.6916	-1.69244	7.38358	0.702785		3.308	0.0187795	7.46066	3.28922	0.695944		10.6916	0.0187795	9.1531	10.6728	0.89687			KO:K02346	DPO4, dinB; DNA polymerase IV [EC:2.7.7.7]	20.1222	95.6697	-2.24927	75.5475	0.855941		20.1222	0.0187795	10.0654	20.1034	0.979615		95.6697	0.0187795	12.3147	95.6509	0.999941
KO:K00483	hpaB; 4-hydroxyphenylacetate 3-monooxygenase [EC:1.14.14.9]	78.5631	96.0981	-0.290655	17.535	0.486794		78.5631	225.016	-1.5181	146.453	0.858238		96.0981	225.016	-1.22745	128.918	0.851641			KO:K02371	fabK; enoyl-[acyl-carrier protein] reductase II [EC:1.3.1.9]	10.4095	40.649	-1.96532	30.2395	0.84066		10.4095	0.196601	5.72648	10.2129	0.876573		40.649	0.196601	7.6918	40.4524	0.992392
KO:K00484	hpaC; flavin reductase (NADH) [EC:1.5.1.36]	10.4269	3.87851	1.42673	6.54834	0.655571		10.4269	0.0187795	9.11693	10.4081	0.908708		3.87851	0.0187795	7.6902	3.85973	0.663283			KO:K02391	flgF; flagellar basal-body rod protein FlgF	11.5183	5.47327	1.07345	6.045	0.639092		11.5183	0.0187795	9.26055	11.4995	0.921984		5.47327	0.0187795	8.1871	5.45449	0.766729
KO:K00486	KMO; kynurenine 3-monooxygenase [EC:1.14.13.9]	3.96251	17.3462	-2.13014	13.3837	0.802045		3.96251	0.0187795	7.72111	3.94373	0.695944		17.3462	0.0187795	9.85125	17.3275	0.963669			KO:K02398	flgM; negative regulator of flagellin synthesis FlgM	14.1882	30.2413	-1.09183	16.0531	0.757674		14.1882	0.0187795	9.56132	14.1694	0.950951		30.2413	0.0187795	10.6531	30.2225	0.993142
KO:K00493	E1.14.14.1; unspecific monooxygenase [EC:1.14.14.1]	13.7735	0.346839	5.31148	13.4266	0.902425		13.7735	0.0187795	9.51852	13.7547	0.942578		0.346839	0.0187795	4.20704	0.32806	0.308921			KO:K02426	sufE; cysteine desulfuration protein SufE	125.152	11.2593	3.4745	113.893	0.865865		125.152	0.0187795	12.7022	125.133	1		11.2593	0.0187795	9.22774	11.2405	0.912298
KO:K00496	alkB1_2, alkM; alkane 1-monooxygenase [EC:1.14.15.3]	10.0412	0.0284763	8.46196	10.0128	0.914784		10.0412	0.0187795	9.06257	10.0225	0.908708		NA	NA	NA	NA	NA			KO:K02431	fucU, FUOM; L-fucose mutarotase [EC:5.1.3.29]	31.2144	0.0284763	10.0982	31.1859	0.996212		31.2144	0.0187795	10.6988	31.1956	0.994982		NA	NA	NA	NA	NA
KO:K00499	CMO; choline monooxygenase [EC:1.14.15.7]	23.809	0.465278	5.67727	23.3437	0.944283		23.809	0.0187795	10.3081	23.7902	0.986159		0.465278	0.0187795	4.63086	0.446498	0.308921			KO:K02450	gspA; general secretion pathway protein A	89.0179	42.9475	1.05152	46.0704	0.787593		89.0179	0.0187795	12.2107	88.9991	0.999906		42.9475	0.0187795	11.1592	42.9287	0.998347
KO:K00500	phhA, PAH; phenylalanine-4-hydroxylase [EC:1.14.16.1]	81.7439	35.5413	1.20161	46.2025	0.796484		81.7439	0.0187795	12.0877	81.7251	0.999843		35.5413	0.0187795	10.8861	35.5226	0.996272			KO:K02471	bacA; vitamin B12/bleomycin/antimicrobial peptide transport system ATP-binding/permease protein	39.9056	0.362272	6.78337	39.5433	0.991576		39.9056	0.0187795	11.0532	39.8868	0.99792		0.362272	0.0187795	4.26984	0.343492	0.308921
KO:K00507	SCD, desC; stearoyl-CoA desaturase (Delta-9 desaturase) [EC:1.14.19.1]	58.8738	0.759484	6.27646	58.1143	0.982723		58.8738	0.0187795	11.6143	58.8551	0.999592		0.759484	0.0187795	5.33779	0.740704	0.308921			KO:K02477	K02477; two-component system, LytTR family, response regulator	24.8989	61.739	-1.3101	36.8401	0.801295		24.8989	5.20649	2.2577	19.6924	0.865325		61.739	5.20649	3.5678	56.5325	0.902028
KO:K00508	E1.14.19.3; linoleoyl-CoA desaturase [EC:1.14.19.3]	16.3857	0.0284763	9.16846	16.3572	0.966332		16.3857	0.0187795	9.76906	16.3669	0.963255		NA	NA	NA	NA	NA			KO:K02478	K02478; two-component system, LytTR family, sensor kinase [EC:2.7.13.3]	5.52463	21.781	-1.97912	16.2563	0.811443		5.52463	0.0187795	8.20058	5.50585	0.792714		21.781	0.0187795	10.1797	21.7622	0.978781
KO:K00510	HMOX1; heme oxygenase 1 [EC:1.14.14.18]	38.4366	0.0284763	10.3985	38.4081	0.998393		38.4366	0.0187795	10.9991	38.4178	0.997669		NA	NA	NA	NA	NA			KO:K02479	K02479; two-component system, NarL family, response regulator	41.3438	53.8953	-0.382491	12.5516	0.527318		41.3438	6.86584	2.59016	34.4779	0.892411		53.8953	6.86584	2.97265	47.0295	0.900586
KO:K00514	ZDS, crtQ; zeta-carotene desaturase [EC:1.3.5.6]	54.0074	28.6883	0.912692	25.319	0.723208		54.0074	0.0187795	11.4898	53.9886	0.999477		28.6883	0.0187795	10.5771	28.6695	0.991243			KO:K02481	K02481; two-component system, NtrC family, response regulator	157.278	188.647	-0.262373	31.3691	0.473101		157.278	21.1297	2.89597	136.149	0.897219		188.647	21.1297	3.15835	167.518	0.902169
KO:K00517	CYP81F; indol-3-yl-methylglucosinolate hydroxylase [EC:1.14.-.-]	59.4984	30.5675	0.96085	28.9309	0.72875		59.4984	0.300632	7.62871	59.1978	0.993811		30.5675	0.300632	6.66786	30.2669	0.959508			KO:K02485	rssB, hnr; two-component system, response regulator	52.5767	13.3381	1.97887	39.2386	0.843514		52.5767	0.180436	8.18679	52.3963	0.998526		13.3381	0.180436	6.20792	13.1576	0.901512
KO:K00518	sodN; nickel superoxide dismutase [EC:1.15.1.1]	1.05757	19.4262	-4.19917	18.3686	0.841225		1.05757	0.144978	2.86685	0.912597	0.348547		19.4262	0.144978	7.06603	19.2812	0.960047			KO:K02487	pilL; type IV pili sensor histidine kinase and response regulator	13.3265	0.0284763	8.87033	13.2981	0.94663		13.3265	0.0187795	9.47093	13.3078	0.942578		NA	NA	NA	NA	NA
KO:K00520	merA; mercuric reductase [EC:1.16.1.1]	43.0575	164.735	-1.93581	121.678	0.844965		43.0575	279.204	-2.69698	236.147	0.896028		164.735	279.204	-0.76117	114.469	0.769508			KO:K02490	spo0F; two-component system, response regulator, stage 0 sporulation protein F	28.8272	8.50019	1.76186	20.327	0.823919		28.8272	0.0187795	10.5841	28.8084	0.99285		8.50019	0.0187795	8.82219	8.48141	0.858335
KO:K00523	ascD, ddhD, rfbI; CDP-4-dehydro-6-deoxyglucose reductase, E3 [EC:1.17.1.1]	6.41109	16.4793	-1.36201	10.0682	0.730093		6.41109	0.168983	5.24562	6.2421	0.724901		16.4793	0.168983	6.60763	16.3103	0.924877			KO:K02507	hofQ; protein transport protein HofQ	0.0284763	21.7293	-9.57566	21.7008	0.984681		0.0187795	17.0812	-9.82904	17.0624	0.968085		21.7293	17.0812	0.347231	4.64809	0.477632
KO:K00524	nrdJ; ribonucleotide reductase, class II [EC:1.17.4.1]	55.8655	0.0284763	10.938	55.837	0.999708		55.8655	0.0187795	11.5386	55.8467	0.99955		NA	NA	NA	NA	NA			KO:K02551	menD; 2-succinyl-5-enolpyruvyl-6-hydroxy-3-cyclohexene-1-carboxylate synthase [EC:2.2.1.9]	57.207	24.767	1.20777	32.44	0.793952		57.207	0.0187795	11.5728	57.1882	0.999571		24.767	0.0187795	10.365	24.7482	0.985803
KO:K00525	E1.17.4.1A, nrdA, nrdE; ribonucleoside-diphosphate reductase alpha chain [EC:1.17.4.1]	566.089	566.803	-0.0018186	0.714038	0.2862		566.089	1042.68	-0.881196	476.592	0.784915		566.803	1042.68	-0.879378	475.878	0.78891			KO:K02552	menF; menaquinone-specific isochorismate synthase [EC:5.4.4.2]	60.074	18.1366	1.72784	41.9374	0.839774		60.074	0.0187795	11.6434	60.0552	0.999624		18.1366	0.0187795	9.91553	18.1178	0.968382
KO:K00526	E1.17.4.1B, nrdB, nrdF; ribonucleoside-diphosphate reductase beta chain [EC:1.17.4.1]	191.962	88.0569	1.12431	103.905	0.79179		191.962	24.2845	2.98271	167.677	0.89723		88.0569	24.2845	1.8584	63.7724	0.885381			KO:K02554	mhpD; 2-keto-4-pentenoate hydratase [EC:4.2.1.80]	98.5617	70.6818	0.479688	27.8799	0.595569		98.5617	1.19774	6.36263	97.3639	0.967761		70.6818	1.19774	5.88295	69.484	0.966073
KO:K00527	rtpR; ribonucleoside-triphosphate reductase (thioredoxin) [EC:1.17.4.2]	30.1378	117.974	-1.96883	87.8365	0.844936		30.1378	4.96975	2.60033	25.168	0.885166		117.974	4.96975	4.56916	113.005	0.902743			KO:K02567	napA; periplasmic nitrate reductase NapA [EC:1.7.99.-]	15.925	22.2347	-0.481521	6.30971	0.50969		15.925	0.216885	6.19821	15.7081	0.925172		22.2347	0.216885	6.67974	22.0178	0.947855
KO:K00528	fpr; ferredoxin/flavodoxin---NADP+ reductase [EC:1.18.1.2 1.19.1.1]	95.5345	117.759	-0.301749	22.2249	0.494877		95.5345	24.7921	1.94614	70.7424	0.879333		117.759	24.7921	2.24789	92.9673	0.895018			KO:K02573	napG; ferredoxin-type protein NapG	10.8555	21.7426	-1.0021	10.8871	0.710138		10.8555	0.0187795	9.17506	10.8367	0.908708		21.7426	0.0187795	10.1772	21.7238	0.978781
KO:K00529	hcaD; 3-phenylpropionate/trans-cinnamate dioxygenase ferredoxin reductase component [EC:1.18.1.3]	4.60693	14.5438	-1.65852	9.93685	0.742618		4.60693	0.0187795	7.93851	4.58815	0.749843		14.5438	0.0187795	9.59703	14.525	0.944033			KO:K02574	napH; ferredoxin-type protein NapH	8.05943	29.2995	-1.86213	21.2401	0.828905		8.05943	0.244581	5.04229	7.81485	0.750909		29.2995	0.244581	6.90442	29.0549	0.979941
KO:K00533	E1.12.7.2L; ferredoxin hydrogenase large subunit [EC:1.12.7.2]	2.35702	3.33259	-0.499676	0.975562	0.2862		2.35702	0.0187795	6.97167	2.33824	0.624409		3.33259	0.0187795	7.47134	3.31381	0.663283			KO:K02575	NRT, narK, nrtP, nasA; MFS transporter, NNP family, nitrate/nitrite transporter	24.0708	33.3172	-0.468982	9.24638	0.54702		24.0708	0.0187795	10.3239	24.052	0.98779		33.3172	0.0187795	10.7929	33.2984	0.995252
KO:K00534	E1.12.7.2S; ferredoxin hydrogenase small subunit [EC:1.12.7.2]	0.760802	0.0284763	4.73969	0.732326	0.2862		0.760802	0.0187795	5.34029	0.742022	0.348547		NA	NA	NA	NA	NA			KO:K02585	nifB; nitrogen fixation protein NifB	17.7993	2.70116	2.72017	15.0981	0.824533		17.7993	0.0187795	9.88845	17.7805	0.968085		2.70116	0.0187795	7.16828	2.68238	0.588898
KO:K00537	ARSC1, arsC; arsenate reductase [EC:1.20.4.1]	7.96902	25.3127	-1.66739	17.3437	0.81193		7.96902	1.8427	2.11258	6.12632	0.717573		25.3127	1.8427	3.77997	23.47	0.886483			KO:K02586	nifD; nitrogenase molybdenum-iron protein alpha chain [EC:1.18.6.1]	17.3717	0.0284763	9.25276	17.3432	0.971445		17.3717	0.0187795	9.85337	17.3529	0.968085		NA	NA	NA	NA	NA
KO:K00540	NA	156.102	141.793	0.138697	14.3084	0.376276		156.102	131.654	0.245732	24.4475	0.537414		141.793	131.654	0.107036	10.1391	0.39354			KO:K02588	nifH; nitrogenase iron protein NifH [EC:1.18.6.1]	19.4175	2.74088	2.82465	16.6767	0.831204		19.4175	0.0187795	10.014	19.3988	0.976301		2.74088	0.0187795	7.18934	2.7221	0.588898
KO:K00543	ASMT; acetylserotonin N-methyltransferase [EC:2.1.1.4]	0.398231	0.0284763	3.80577	0.369755	0.2862		0.398231	0.0187795	4.40638	0.379452	0.348547		NA	NA	NA	NA	NA			KO:K02591	nifK; nitrogenase molybdenum-iron protein beta chain [EC:1.18.6.1]	16.9317	0.0284763	9.21575	16.9032	0.966332		16.9317	0.0187795	9.81635	16.9129	0.963255		NA	NA	NA	NA	NA
KO:K00544	BHMT; betaine-homocysteine S-methyltransferase [EC:2.1.1.5]	0.370461	0.0284763	3.70149	0.341985	0.2862		0.370461	0.0187795	4.30209	0.351682	0.348547		NA	NA	NA	NA	NA			KO:K02594	nifV; homocitrate synthase NifV [EC:2.3.3.14]	15.7421	12.0341	0.387495	3.70795	0.425117		15.7421	0.0187795	9.71125	15.7233	0.957359		12.0341	0.0187795	9.32376	12.0153	0.924912
KO:K00547	mmuM, BHMT2; homocysteine S-methyltransferase [EC:2.1.1.10]	187.793	161.156	0.220683	26.6367	0.44179		187.793	120.657	0.638236	67.1364	0.738041		161.156	120.657	0.417553	40.4997	0.646213			KO:K02609	paaA; ring-1,2-phenylacetyl-CoA epoxidase subunit PaaA [EC:1.14.13.149]	36.6321	85.1457	-1.21683	48.5136	0.800682		36.6321	12.5937	1.5404	24.0384	0.846132		85.1457	12.5937	2.75723	72.5519	0.900563
KO:K00548	metH, MTR; 5-methyltetrahydrofolate--homocysteine methyltransferase [EC:2.1.1.13]	279.147	194.138	0.52394	85.0086	0.617978		279.147	119.506	1.22394	159.641	0.844836		194.138	119.506	0.699997	74.6319	0.753611			KO:K02613	paaE; ring-1,2-phenylacetyl-CoA epoxidase subunit PaaE	10.0382	18.3703	-0.87187	8.33205	0.62649		10.0382	0.0187795	9.06213	10.0194	0.908708		18.3703	0.0187795	9.934	18.3515	0.968382
KO:K00549	metE; 5-methyltetrahydropteroyltriglutamate--homocysteine methyltransferase [EC:2.1.1.14]	329.356	571.964	-0.796278	242.608	0.711833		329.356	1283.56	-1.96243	954.206	0.879542		571.964	1283.56	-1.16616	711.597	0.847444			KO:K02616	paaX; phenylacetic acid degradation operon negative regulatory protein	28.3465	6.32326	2.16443	22.0233	0.841985		28.3465	0.0187795	10.5598	28.3278	0.99285		6.32326	0.0187795	8.39537	6.30448	0.803623
KO:K00554	trmD; tRNA (guanine37-N1)-methyltransferase [EC:2.1.1.228]	277.945	274.322	0.0189272	3.62263	0.28994		277.945	121.87	1.18945	156.075	0.841334		274.322	121.87	1.17053	152.452	0.847444			KO:K02631	pecE; phycoerythrocyanin alpha-cysteine-84 phycoviolobilin lyase/isomerase subunit PecE [EC:4.4.1.31]	20.2213	0.0284763	9.47189	20.1928	0.982187		20.2213	0.0187795	10.0725	20.2025	0.979615		NA	NA	NA	NA	NA
KO:K00555	TRMT1, trm1; tRNA (guanine26-N2/guanine27-N2)-dimethyltransferase [EC:2.1.1.215 2.1.1.216]	58.8109	106.012	-0.850068	47.2008	0.723451		58.8109	357.778	-2.60491	298.967	0.895934		106.012	357.778	-1.75484	251.767	0.883365			KO:K02634	petA; apocytochrome f	41.8669	0.0284763	10.5218	41.8384	0.998831		41.8669	0.0187795	11.1224	41.8481	0.998401		NA	NA	NA	NA	NA
KO:K00556	trmH; tRNA (guanosine-2'-O-)-methyltransferase [EC:2.1.1.34]	46.244	99.3263	-1.10291	53.0823	0.790095		46.244	58.0623	-0.328336	11.8183	0.57096		99.3263	58.0623	0.774574	41.264	0.769343			KO:K02636	petC; cytochrome b6-f complex iron-sulfur subunit [EC:1.10.9.1]	131.057	148.515	-0.180409	17.4575	0.406437		131.057	20.0825	2.70619	110.975	0.896007		148.515	20.0825	2.88659	128.432	0.901688
KO:K00557	trmA; tRNA (uracil-5-)-methyltransferase [EC:2.1.1.35]	12.4741	6.41904	0.958505	6.05505	0.589053		12.4741	0.0187795	9.37556	12.4553	0.93317		6.41904	0.0187795	8.41706	6.40026	0.803623			KO:K02637	petD; cytochrome b6-f complex subunit 4	46.4662	0.0284763	10.6722	46.4377	0.99925		46.4662	0.0187795	11.2728	46.4474	0.999091		NA	NA	NA	NA	NA
KO:K00558	DNMT1, dcm; DNA (cytosine-5)-methyltransferase 1 [EC:2.1.1.37]	76.6303	50.2157	0.609778	26.4147	0.66231		76.6303	251.588	-1.71508	174.958	0.875946		50.2157	251.588	-2.32485	201.372	0.898828			KO:K02638	petE; plastocyanin	32.6005	0.0284763	10.1609	32.572	0.996582		32.6005	0.0187795	10.7615	32.5817	0.995463		NA	NA	NA	NA	NA
KO:K00559	E2.1.1.41, SMT1, ERG6; sterol 24-C-methyltransferase [EC:2.1.1.41]	0.157291	0.0284763	2.4656	0.128815	0.2862		0.157291	0.0187795	3.06621	0.138512	0.348547		NA	NA	NA	NA	NA			KO:K02639	petF; ferredoxin	108.159	2.80252	5.27029	105.357	0.955785		108.159	0.0187795	12.4917	108.14	0.999979		2.80252	0.0187795	7.22142	2.78374	0.588898
KO:K00560	thyA, TYMS; thymidylate synthase [EC:2.1.1.45]	29.1503	42.7766	-0.553313	13.6263	0.596046		29.1503	8.61011	1.7594	20.5401	0.856272		42.7766	8.61011	2.31272	34.1665	0.890914			KO:K02640	petG; cytochrome b6-f complex subunit 5	31.7491	0.0284763	10.1227	31.7206	0.996212		31.7491	0.0187795	10.7233	31.7303	0.994982		NA	NA	NA	NA	NA
KO:K00564	rsmC; 16S rRNA (guanine1207-N2)-methyltransferase [EC:2.1.1.172]	18.447	54.5812	-1.56501	36.1341	0.815748		18.447	69.6291	-1.9163	51.1821	0.878925		54.5812	69.6291	-0.351287	15.0479	0.581524			KO:K02641	petH; ferredoxin--NADP+ reductase [EC:1.18.1.2]	36.5927	0.0284763	10.3276	36.5643	0.997984		36.5927	0.0187795	10.9282	36.574	0.997198		NA	NA	NA	NA	NA
KO:K00566	mnmA, trmU; tRNA-uridine 2-sulfurtransferase [EC:2.8.1.13]	304.438	346.282	-0.185797	41.8435	0.417725		304.438	120.748	1.33415	183.69	0.853889		346.282	120.748	1.51995	225.534	0.865721			KO:K02643	petM; cytochrome b6-f complex subunit 7	21.6979	0.0284763	9.57358	21.6695	0.984681		21.6979	0.0187795	10.1742	21.6792	0.982218		NA	NA	NA	NA	NA
KO:K00567	ogt, MGMT; methylated-DNA-[protein]-cysteine S-methyltransferase [EC:2.1.1.63]	93.8532	183.573	-0.967876	89.7198	0.734018		93.8532	325.155	-1.79265	231.302	0.876803		183.573	325.155	-0.824776	141.582	0.781067			KO:K02657	pilG; twitching motility two-component system response regulator PilG	81.9848	5.88947	3.79915	76.0953	0.865855		81.9848	0.0187795	12.092	81.966	0.999843		5.88947	0.0187795	8.29284	5.87069	0.766729
KO:K00568	ubiG; 2-polyprenyl-6-hydroxyphenyl methylase / 3-demethylubiquinone-9 3-methyltransferase [EC:2.1.1.222 2.1.1.64]	23.6778	24.7472	-0.0637292	1.06938	0.30373		23.6778	30.2329	-0.352583	6.55508	0.534947		24.7472	30.2329	-0.288854	5.4857	0.47837			KO:K02658	pilH; twitching motility two-component system response regulator PilH	130.737	40.5333	1.68949	90.2036	0.840524		130.737	1.87351	6.12478	128.863	0.967813		40.5333	1.87351	4.43529	38.6598	0.900211
KO:K00569	TPMT, tpmT; thiopurine S-methyltransferase [EC:2.1.1.67]	4.77271	0.0284763	7.3889	4.74424	0.749981		4.77271	0.0187795	7.98951	4.75393	0.749843		NA	NA	NA	NA	NA			KO:K02659	pilI; twitching motility protein PilI	36.2309	0.136088	8.05654	36.0949	0.997663		36.2309	0.0187795	10.9138	36.2122	0.997198		0.136088	0.0187795	2.85731	0.117309	0.308921
KO:K00570	pmtA; phosphatidylethanolamine/phosphatidyl-N-methylethanolamine N-methyltransferase [EC:2.1.1.17 2.1.1.71]	2.26324	1.70572	0.40801	0.557521	0.2862		2.26324	0.0187795	6.91309	2.24446	0.624409		1.70572	0.0187795	6.50508	1.68694	0.482345			KO:K02660	pilJ; twitching motility protein PilJ	66.1397	4.90603	3.75289	61.2337	0.865719		66.1397	0.973239	6.08658	65.1665	0.967562		4.90603	0.973239	2.33369	3.93279	0.571606
KO:K00571	E2.1.1.72; site-specific DNA-methyltransferase (adenine-specific) [EC:2.1.1.72]	1259.21	702.884	0.841158	556.324	0.720617		1259.21	788.034	0.676187	471.174	0.748265		702.884	788.034	-0.164971	85.1498	0.443775			KO:K02662	pilM; type IV pilus assembly protein PilM	181.175	113.897	0.669652	67.2776	0.679314		181.175	5.77168	4.97225	175.403	0.898035		113.897	5.77168	4.30259	108.125	0.902743
KO:K00573	E2.1.1.77, pcm; protein-L-isoaspartate(D-aspartate) O-methyltransferase [EC:2.1.1.77]	172.723	239.348	-0.470646	66.6245	0.596397		172.723	200.5	-0.215143	27.7771	0.520615		239.348	200.5	0.255504	38.8474	0.537163			KO:K02663	pilN; type IV pilus assembly protein PilN	56.1959	19.4254	1.53252	36.7704	0.815728		56.1959	0.0187795	11.5471	56.1771	0.999561		19.4254	0.0187795	10.0146	19.4067	0.972438
KO:K00574	cfa; cyclopropane-fatty-acyl-phospholipid synthase [EC:2.1.1.79]	57.3641	9.33205	2.61988	48.032	0.86307		57.3641	5.20129	3.46321	52.1628	0.897439		9.33205	5.20129	0.843325	4.13076	0.55422			KO:K02664	pilO; type IV pilus assembly protein PilO	71.5761	13.6881	2.38655	57.888	0.860245		71.5761	0.0187795	11.8961	71.5573	0.999791		13.6881	0.0187795	9.50955	13.6694	0.935135
KO:K00575	cheR; chemotaxis protein methyltransferase CheR [EC:2.1.1.80]	195.675	170.76	0.196487	24.9147	0.42278		195.675	68.7228	1.5096	126.952	0.858196		170.76	68.7228	1.31311	102.037	0.853494			KO:K02668	pilS, pehS; two-component system, NtrC family, sensor histidine kinase PilS [EC:2.7.13.3]	11.461	19.3332	-0.754347	7.8722	0.595501		11.461	0.0187795	9.25336	11.4422	0.921984		19.3332	0.0187795	10.0077	19.3144	0.972438
KO:K00577	mtrA; tetrahydromethanopterin S-methyltransferase subunit A [EC:2.1.1.86]	5.02845	29.0861	-2.53215	24.0577	0.851042		5.02845	1.70069	1.564	3.32776	0.580159		29.0861	1.70069	4.09614	27.3854	0.892966			KO:K02670	pilU; twitching motility protein PilU	12.7341	17.6439	-0.470475	4.90982	0.470179		12.7341	0.0187795	9.40532	12.7153	0.93317		17.6439	0.0187795	9.8758	17.6251	0.963669
KO:K00578	mtrB; tetrahydromethanopterin S-methyltransferase subunit B [EC:2.1.1.86]	0.0284763	0.350172	-3.62023	0.321696	0.2862		NA	NA	NA	NA	NA		0.350172	0.0187795	4.22084	0.331393	0.308921			KO:K02689	psaA; photosystem I P700 chlorophyll a apoprotein A1	38.9967	0.0284763	10.4194	38.9683	0.998393		38.9967	0.0187795	11.02	38.978	0.997669		NA	NA	NA	NA	NA
KO:K00579	mtrC; tetrahydromethanopterin S-methyltransferase subunit C [EC:2.1.1.86]	0.0284763	0.713213	-4.6465	0.684737	0.2862		NA	NA	NA	NA	NA		0.713213	0.0187795	5.2471	0.694434	0.308921			KO:K02690	psaB; photosystem I P700 chlorophyll a apoprotein A2	37.5263	0.0284763	10.3639	37.4978	0.998208		37.5263	0.0187795	10.9645	37.5075	0.997407		NA	NA	NA	NA	NA
KO:K00580	mtrD; tetrahydromethanopterin S-methyltransferase subunit D [EC:2.1.1.86]	0.0284763	0.746829	-4.71294	0.718353	0.2862		NA	NA	NA	NA	NA		0.746829	0.0187795	5.31355	0.72805	0.308921			KO:K02691	psaC; photosystem I subunit VII	46.2815	0.0284763	10.6665	46.253	0.99925		46.2815	0.0187795	11.2671	46.2627	0.999091		NA	NA	NA	NA	NA
KO:K00581	mtrE; tetrahydromethanopterin S-methyltransferase subunit E [EC:2.1.1.86]	0.0284763	0.360178	-3.66087	0.331701	0.2862		NA	NA	NA	NA	NA		0.360178	0.0187795	4.26148	0.341398	0.308921			KO:K02692	psaD; photosystem I subunit II	33.4983	0.0284763	10.2001	33.4698	0.996932		33.4983	0.0187795	10.8007	33.4795	0.995902		NA	NA	NA	NA	NA
KO:K00583	mtrG; tetrahydromethanopterin S-methyltransferase subunit G [EC:2.1.1.86]	0.0284763	0.486976	-4.09602	0.4585	0.2862		NA	NA	NA	NA	NA		0.486976	0.0187795	4.69662	0.468197	0.308921			KO:K02693	psaE; photosystem I subunit IV	32.2466	0.0284763	10.1452	32.2181	0.996582		32.2466	0.0187795	10.7458	32.2278	0.995463		NA	NA	NA	NA	NA
KO:K00584	mtrH; tetrahydromethanopterin S-methyltransferase subunit H [EC:2.1.1.86]	4.24739	10.2271	-1.26775	5.97973	0.616186		4.24739	0.122783	5.11239	4.1246	0.650408		10.2271	0.122783	6.38014	10.1043	0.863247			KO:K02694	psaF; photosystem I subunit III	33.6678	0.0284763	10.2074	33.6394	0.996932		33.6678	0.0187795	10.808	33.6491	0.995902		NA	NA	NA	NA	NA
KO:K00586	DPH5; diphthine methyl ester synthase [EC:2.1.1.314]	14.4775	69.3187	-2.25943	54.8411	0.855658		14.4775	298.847	-4.36752	284.37	0.898035		69.3187	298.847	-2.10809	229.529	0.894162			KO:K02696	psaI; photosystem I subunit VIII	33.3171	0.0284763	10.1923	33.2886	0.996932		33.3171	0.0187795	10.7929	33.2983	0.995902		NA	NA	NA	NA	NA
KO:K00587	ICMT, STE14; protein-S-isoprenylcysteine O-methyltransferase [EC:2.1.1.100]	10.2208	0.104881	6.60661	10.1159	0.89777		10.2208	0.0187795	9.08814	10.202	0.908708		0.104881	0.0187795	2.48153	0.0861018	0.308921			KO:K02697	psaJ; photosystem I subunit IX	33.6678	0.0284763	10.2074	33.6394	0.996932		33.6678	0.0187795	10.808	33.6491	0.995902		NA	NA	NA	NA	NA
KO:K00588	E2.1.1.104; caffeoyl-CoA O-methyltransferase [EC:2.1.1.104]	48.9499	49.2173	-0.00786141	0.267461	0.2862		48.9499	1.8427	4.73141	47.1072	0.89723		49.2173	1.8427	4.73927	47.3746	0.901653			KO:K02698	psaK; photosystem I subunit X	36.4253	0.0284763	10.321	36.3968	0.997984		36.4253	0.0187795	10.9216	36.4065	0.997198		NA	NA	NA	NA	NA
KO:K00590	E2.1.1.113; site-specific DNA-methyltransferase (cytosine-N4-specific) [EC:2.1.1.113]	135.969	142.717	-0.0698824	6.74827	0.321104		135.969	61.2504	1.15048	74.7182	0.838731		142.717	61.2504	1.22037	81.4665	0.851524			KO:K02699	psaL; photosystem I subunit XI	53.182	0.0284763	10.867	53.1535	0.999649		53.182	0.0187795	11.4676	53.1632	0.999477		NA	NA	NA	NA	NA
KO:K00591	COQ3; polyprenyldihydroxybenzoate methyltransferase / 3-demethylubiquinol 3-O-methyltransferase [EC:2.1.1.114 2.1.1.64]	0.0284763	11.1012	-8.60674	11.0728	0.927269		0.0187795	19.5957	-10.0272	19.577	0.976301		11.1012	19.5957	-0.819818	8.4945	0.659871			KO:K02700	psaM; photosystem I subunit XII	17.7519	0.0284763	9.28399	17.7234	0.971445		17.7519	0.0187795	9.8846	17.7331	0.968085		NA	NA	NA	NA	NA
KO:K00595	cobL; precorrin-6Y C5,15-methyltransferase (decarboxylating) [EC:2.1.1.132]	109.182	22.0621	2.3071	87.1204	0.855951		109.182	17.0395	2.67979	92.143	0.895871		22.0621	17.0395	0.372686	5.02258	0.503142			KO:K02703	psbA; photosystem II P680 reaction center D1 protein [EC:1.10.3.9]	91.5117	0.0284763	11.65	91.4832	0.99999		91.5117	0.0187795	12.2506	91.4929	0.999927		NA	NA	NA	NA	NA
KO:K00596	E4.1.1.64; 2,2-dialkylglycine decarboxylase (pyruvate) [EC:4.1.1.64]	0.128125	0.0284763	2.16972	0.099649	0.2862		0.128125	0.0187795	2.77033	0.109346	0.348547		NA	NA	NA	NA	NA			KO:K02704	psbB; photosystem II CP47 chlorophyll apoprotein	62.6199	0.0284763	11.1026	62.5914	0.999834		62.6199	0.0187795	11.7032	62.6011	0.999686		NA	NA	NA	NA	NA
KO:K00598	tam; trans-aconitate 2-methyltransferase [EC:2.1.1.144]	27.5531	0.0284763	9.91824	27.5247	0.993592		27.5531	0.0187795	10.5188	27.5344	0.991846		NA	NA	NA	NA	NA			KO:K02705	psbC; photosystem II CP43 chlorophyll apoprotein	53.9788	0.0284763	10.8884	53.9503	0.999649		53.9788	0.0187795	11.489	53.96	0.999477		NA	NA	NA	NA	NA
KO:K00600	glyA, SHMT; glycine hydroxymethyltransferase [EC:2.1.2.1]	387.049	445.804	-0.203895	58.7556	0.42315		387.049	526.373	-0.44357	139.324	0.659116		445.804	526.373	-0.239675	80.5688	0.517128			KO:K02706	psbD; photosystem II P680 reaction center D2 protein [EC:1.10.3.9]	72.8656	0.0284763	11.3213	72.8371	0.999951		72.8656	0.0187795	11.9219	72.8468	0.999791		NA	NA	NA	NA	NA
KO:K00601	E2.1.2.2; phosphoribosylglycinamide formyltransferase [EC:2.1.2.2]	28.492	20.8937	0.447488	7.59827	0.520277		28.492	3.57958	2.99269	24.9124	0.88502		20.8937	3.57958	2.54521	17.3141	0.862802			KO:K02707	psbE; photosystem II cytochrome b559 subunit alpha	32.7428	0.0284763	10.1672	32.7143	0.996582		32.7428	0.0187795	10.7678	32.724	0.995463		NA	NA	NA	NA	NA
KO:K00602	purH; phosphoribosylaminoimidazolecarboxamide formyltransferase / IMP cyclohydrolase [EC:2.1.2.3 3.5.4.10]	280.578	229.259	0.291426	51.3193	0.489881		280.578	277.287	0.017022	3.29102	0.355154		229.259	277.287	-0.274404	48.0283	0.541594			KO:K02708	psbF; photosystem II cytochrome b559 subunit beta	33.3086	0.0284763	10.1919	33.2801	0.996932		33.3086	0.0187795	10.7925	33.2898	0.995902		NA	NA	NA	NA	NA
KO:K00603	fctD; glutamate formiminotransferase [EC:2.1.2.5]	63.5318	60.9923	0.0588524	2.53953	0.310596		63.5318	10.4564	2.6031	53.0754	0.895411		60.9923	10.4564	2.54424	50.5359	0.898253			KO:K02709	psbH; photosystem II PsbH protein	37.9415	0.0284763	10.3798	37.913	0.998208		37.9415	0.0187795	10.9804	37.9227	0.997407		NA	NA	NA	NA	NA
KO:K00604	MTFMT, fmt; methionyl-tRNA formyltransferase [EC:2.1.2.9]	285.469	292.402	-0.0346191	6.933	0.29554		285.469	123.254	1.21169	162.214	0.841522		292.402	123.254	1.24631	169.147	0.852028			KO:K02710	psbI; photosystem II PsbI protein	33.0338	0.0284763	10.18	33.0053	0.996932		33.0338	0.0187795	10.7806	33.015	0.995902		NA	NA	NA	NA	NA
KO:K00605	gcvT, AMT; aminomethyltransferase [EC:2.1.2.10]	323.328	232.997	0.472685	90.3306	0.596513		323.328	251.879	0.36027	71.4494	0.615639		232.997	251.879	-0.112415	18.8812	0.394842			KO:K02711	psbJ; photosystem II PsbJ protein	33.3286	0.0284763	10.1928	33.3001	0.996932		33.3286	0.0187795	10.7934	33.3098	0.995902		NA	NA	NA	NA	NA
KO:K00606	panB; 3-methyl-2-oxobutanoate hydroxymethyltransferase [EC:2.1.2.11]	226.542	300.228	-0.406278	73.6856	0.555327		226.542	355.296	-0.649244	128.754	0.741355		300.228	355.296	-0.242965	55.0686	0.516999			KO:K02712	psbK; photosystem II PsbK protein	35.2975	0.0284763	10.2756	35.269	0.997653		35.2975	0.0187795	10.8762	35.2787	0.996843		NA	NA	NA	NA	NA
KO:K00608	pyrBI; aspartate carbamoyltransferase [EC:2.1.3.2]	0.795084	0.0284763	4.80327	0.766607	0.2862		0.795084	0.0187795	5.40388	0.776304	0.348547		NA	NA	NA	NA	NA			KO:K02713	psbL; photosystem II PsbL protein	33.5705	0.0284763	10.2032	33.5421	0.996932		33.5705	0.0187795	10.8038	33.5517	0.995902		NA	NA	NA	NA	NA
KO:K00609	pyrB, PYR2; aspartate carbamoyltransferase catalytic subunit [EC:2.1.3.2]	254.514	344.603	-0.437192	90.0893	0.585041		254.514	573.089	-1.17102	318.575	0.840905		344.603	573.089	-0.733824	228.486	0.756928			KO:K02714	psbM; photosystem II PsbM protein	28.5523	0.0284763	9.96963	28.5238	0.994439		28.5523	0.0187795	10.5702	28.5335	0.99285		NA	NA	NA	NA	NA
KO:K00610	pyrI; aspartate carbamoyltransferase regulatory subunit	15.8029	79.8213	-2.33659	64.0184	0.860323		15.8029	337.884	-4.41827	322.081	0.898035		79.8213	337.884	-2.08168	258.063	0.894127			KO:K02715	psbN; PsbN protein	34.4199	0.0284763	10.2393	34.3914	0.997302		34.4199	0.0187795	10.8399	34.4011	0.996477		NA	NA	NA	NA	NA
KO:K00611	OTC, argF, argI; ornithine carbamoyltransferase [EC:2.1.3.3]	253.098	330.541	-0.385134	77.4432	0.55076		253.098	347.504	-0.457336	94.4064	0.667311		330.541	347.504	-0.0722015	16.9633	0.358394			KO:K02716	psbO; photosystem II oxygen-evolving enhancer protein 1	32.7393	0.0284763	10.167	32.7108	0.996582		32.7393	0.0187795	10.7677	32.7205	0.995463		NA	NA	NA	NA	NA
KO:K00612	E2.1.3.-; carbamoyltransferase [EC:2.1.3.-]	20.5014	30.5098	-0.573551	10.0084	0.577444		20.5014	61.3592	-1.58156	40.8578	0.873604		30.5098	61.3592	-1.00801	30.8494	0.832978			KO:K02717	psbP; photosystem II oxygen-evolving enhancer protein 2	33.4653	0.0284763	10.1987	33.4368	0.996932		33.4653	0.0187795	10.7993	33.4465	0.995902		NA	NA	NA	NA	NA
KO:K00615	E2.2.1.1, tktA, tktB; transketolase [EC:2.2.1.1]	444.126	622.916	-0.488068	178.79	0.607431		444.126	248.895	0.835434	195.232	0.778612		622.916	248.895	1.3235	374.021	0.860657			KO:K02718	psbT; photosystem II PsbT protein	34.3873	0.0284763	10.2379	34.3589	0.997302		34.3873	0.0187795	10.8385	34.3686	0.996477		NA	NA	NA	NA	NA
KO:K00616	E2.2.1.2, talA, talB; transaldolase [EC:2.2.1.2]	255.715	273.492	-0.0969613	17.7769	0.344118		255.715	61.7405	2.05025	193.975	0.888344		273.492	61.7405	2.14721	211.751	0.894338			KO:K02719	psbU; photosystem II PsbU protein	32.7124	0.0284763	10.1659	32.6839	0.996582		32.7124	0.0187795	10.7665	32.6936	0.995463		NA	NA	NA	NA	NA
KO:K00619	argA; amino-acid N-acetyltransferase [EC:2.3.1.1]	75.6084	73.5607	0.039612	2.04773	0.299844		75.6084	30.0292	1.33218	45.5792	0.852937		73.5607	30.0292	1.29257	43.5315	0.851911			KO:K02720	psbV; photosystem II cytochrome c550	69.0496	0.0284763	11.2437	69.0211	0.999912		69.0496	0.0187795	11.8443	69.0308	0.99977		NA	NA	NA	NA	NA
KO:K00620	argJ; glutamate N-acetyltransferase / amino-acid N-acetyltransferase [EC:2.3.1.35 2.3.1.1]	223.975	148.216	0.595639	75.7592	0.665183		223.975	114.959	0.962223	109.016	0.790184		148.216	114.959	0.366583	33.257	0.607222			KO:K02722	psbX; photosystem II PsbX protein	33.7139	0.0284763	10.2094	33.6855	0.996932		33.7139	0.0187795	10.81	33.6952	0.995902		NA	NA	NA	NA	NA
KO:K00625	E2.3.1.8, pta; phosphate acetyltransferase [EC:2.3.1.8]	46.7525	39.7082	0.235608	7.04434	0.433853		46.7525	0.469252	6.63854	46.2833	0.966904		39.7082	0.469252	6.40293	39.2389	0.96408			KO:K02723	psbY; photosystem II PsbY protein	30.0691	0.0284763	10.0443	30.0407	0.995686		30.0691	0.0187795	10.6449	30.0503	0.994428		NA	NA	NA	NA	NA
KO:K00626	E2.3.1.9, atoB; acetyl-CoA C-acetyltransferase [EC:2.3.1.9]	525.952	769.858	-0.54966	243.905	0.627474		525.952	1614.09	-1.61772	1088.14	0.875465		769.858	1614.09	-1.06806	844.235	0.840926			KO:K02724	psbZ; photosystem II PsbZ protein	34.2639	0.0284763	10.2327	34.2354	0.997302		34.2639	0.0187795	10.8333	34.2451	0.996477		NA	NA	NA	NA	NA
KO:K00627	DLAT, aceF, pdhC; pyruvate dehydrogenase E2 component (dihydrolipoamide acetyltransferase) [EC:2.3.1.12]	449.384	314.791	0.513552	134.592	0.616313		449.384	713.626	-0.667221	264.243	0.743602		314.791	713.626	-1.18077	398.835	0.847573			KO:K02768	PTS-Fru-EIIA, fruB; PTS system, fructose-specific IIA component [EC:2.7.1.202]	19.8055	34.1566	-0.786262	14.3511	0.673052		19.8055	0.0187795	10.0425	19.7868	0.976301		34.1566	0.0187795	10.8288	34.1378	0.995826
KO:K00631	plsB; glycerol-3-phosphate O-acyltransferase [EC:2.3.1.15]	7.43826	4.67746	0.669239	2.7608	0.435129		7.43826	16.1698	-1.12027	8.73156	0.72028		4.67746	16.1698	-1.78951	11.4924	0.796659			KO:K02784	PTS-HPR.PTSH, ptsH; phosphocarrier protein HPr	20.0015	0.0284763	9.45613	19.9731	0.979168		20.0015	0.0187795	10.0567	19.9828	0.976301		NA	NA	NA	NA	NA
KO:K00632	fadA, fadI; acetyl-CoA acyltransferase [EC:2.3.1.16]	295.425	144.105	1.03567	151.32	0.787924		295.425	159.894	0.885678	135.531	0.786191		144.105	159.894	-0.149995	15.7889	0.434033			KO:K02793	PTS-Man-EIIA, manX; PTS system, mannose-specific IIA component [EC:2.7.1.191]	10.6233	21.2223	-0.998343	10.5989	0.710138		10.6233	0.148361	6.16198	10.475	0.876573		21.2223	0.148361	7.16033	21.0739	0.966389
KO:K00633	lacA; galactoside O-acetyltransferase [EC:2.3.1.18]	13.3872	8.52422	0.651211	4.86295	0.509944		13.3872	0.445622	4.90889	12.9415	0.831225		8.52422	0.445622	4.25768	8.0786	0.761172			KO:K02824	pyrP, uraA; uracil permease	11.7904	5.13649	1.19876	6.65389	0.642384		11.7904	0.0187795	9.29424	11.7716	0.921984		5.13649	0.0187795	8.09548	5.11771	0.766729
KO:K00634	ptb; phosphate butyryltransferase [EC:2.3.1.19]	33.6421	94.4455	-1.48921	60.8034	0.817141		33.6421	0.0981909	8.42046	33.5439	0.995442		94.4455	0.0981909	9.90968	94.3473	0.999941			KO:K02828	qoxC; cytochrome aa3-600 menaquinol oxidase subunit III [EC:1.10.3.12]	0.383578	0.651723	-0.764738	0.268145	0.2862		0.383578	56.2311	-7.1957	55.8475	0.986212		0.651723	56.2311	-6.43096	55.5794	0.965709
KO:K00635	E2.3.1.20; diacylglycerol O-acyltransferase [EC:2.3.1.20]	1.47301	0.0284763	5.69286	1.44453	0.494595		1.47301	0.0187795	6.29347	1.45423	0.524096		NA	NA	NA	NA	NA			KO:K02837	prfC; peptide chain release factor 3	40.8118	0.637942	5.99942	40.1739	0.95447		40.8118	0.0187795	11.0856	40.793	0.99815		0.637942	0.0187795	5.0862	0.619162	0.308921
KO:K00639	kbl, GCAT; glycine C-acetyltransferase [EC:2.3.1.29]	170.099	223.348	-0.392918	53.2489	0.550604		170.099	144.185	0.238456	25.9142	0.531946		223.348	144.185	0.631374	79.1631	0.736823			KO:K02844	waaG, rfaG; UDP-glucose:(heptosyl)LPS alpha-1,3-glucosyltransferase [EC:2.4.1.-]	17.0443	25.0699	-0.556666	8.02558	0.555649		17.0443	0.375495	5.50435	16.6688	0.86129		25.0699	0.375495	6.06102	24.6944	0.952169
KO:K00640	cysE; serine O-acetyltransferase [EC:2.3.1.30]	126.075	135.112	-0.0998713	9.03679	0.343621		126.075	70.2927	0.842834	55.7822	0.778162		135.112	70.2927	0.942706	64.819	0.793939			KO:K02849	waaQ, rfaQ; heptosyltransferase III [EC:2.4.-.-]	53.5088	80.759	-0.593848	27.2502	0.660255		53.5088	0.162698	8.36143	53.3461	0.999017		80.759	0.162698	8.95528	80.5963	0.999836
KO:K00641	metX; homoserine O-acetyltransferase [EC:2.3.1.31]	160.37	33.1052	2.27627	127.265	0.855989		160.37	0.0187795	13.06	160.351	1		33.1052	0.0187795	10.7837	33.0864	0.995252			KO:K02873	RP-L13e, RPL13; large subunit ribosomal protein L13e	0.891383	15.2969	-4.10105	14.4055	0.819848		0.891383	215.159	-7.91514	214.268	0.99747		15.2969	215.159	-3.8141	199.862	0.902743
KO:K00643	E2.3.1.37, ALAS; 5-aminolevulinate synthase [EC:2.3.1.37]	4.08249	0.0284763	7.16354	4.05401	0.749981		4.08249	0.0187795	7.76415	4.06371	0.749843		NA	NA	NA	NA	NA			KO:K02875	RP-L14e, RPL14; large subunit ribosomal protein L14e	11.0098	40.3682	-1.87443	29.3584	0.839901		11.0098	263.525	-4.58107	252.515	0.898035		40.3682	263.525	-2.70665	223.156	0.900785
KO:K00645	fabD; [acyl-carrier-protein] S-malonyltransferase [EC:2.3.1.39]	247.598	260.639	-0.0740557	13.0414	0.321455		247.598	120.312	1.04121	127.285	0.833807		260.639	120.312	1.11527	140.327	0.843587			KO:K02913	RP-L33, MRPL33, rpmG; large subunit ribosomal protein L33	190.084	138.503	0.456722	51.5813	0.592978		190.084	13.2097	3.84697	176.875	0.898035		138.503	13.2097	3.39025	125.293	0.902591
KO:K00647	fabB; 3-oxoacyl-[acyl-carrier-protein] synthase I [EC:2.3.1.41]	0.0284763	0.173241	-2.60494	0.144764	0.2862		NA	NA	NA	NA	NA		0.173241	0.0187795	3.20555	0.154461	0.308921			KO:K02914	RP-L34, MRPL34, rpmH; large subunit ribosomal protein L34	123.322	80.8725	0.608707	42.4493	0.666001		123.322	12.6932	3.2803	110.629	0.897847		80.8725	12.6932	2.67159	68.1793	0.900375
KO:K00648	fabH; 3-oxoacyl-[acyl-carrier-protein] synthase III [EC:2.3.1.180]	241.278	294.47	-0.287427	53.1924	0.489881		241.278	176.212	0.453383	65.0657	0.662628		294.47	176.212	0.740809	118.258	0.76803			KO:K02915	RP-L34e, RPL34; large subunit ribosomal protein L34e	10.9441	34.9358	-1.67456	23.9918	0.828896		10.9441	252.553	-4.52837	241.609	0.898035		34.9358	252.553	-2.85381	217.617	0.901688
KO:K00651	metA; homoserine O-succinyltransferase [EC:2.3.1.46]	2.63444	0.0284763	6.53159	2.60597	0.613664		2.63444	0.0187795	7.1322	2.61566	0.624409		NA	NA	NA	NA	NA			KO:K02917	RP-L35Ae, RPL35A; large subunit ribosomal protein L35Ae	0.0284763	4.82778	-7.40545	4.7993	0.749981		0.0187795	61.9619	-11.688	61.9431	0.999665		4.82778	61.9619	-3.68195	57.1341	0.902134
KO:K00652	bioF; 8-amino-7-oxononanoate synthase [EC:2.3.1.47]	70.5535	77.0541	-0.127154	6.50059	0.364258		70.5535	22.9259	1.62174	47.6275	0.87466		77.0541	22.9259	1.74889	54.1281	0.882696			KO:K02918	RP-L35e, RPL35; large subunit ribosomal protein L35e	0.128168	7.95054	-5.95495	7.82237	0.813732		0.128168	127.628	-9.9597	127.5	1		7.95054	127.628	-4.00475	119.678	0.902732
KO:K00655	plsC; 1-acyl-sn-glycerol-3-phosphate acyltransferase [EC:2.3.1.51]	303.86	335.689	-0.143718	31.8289	0.376821		303.86	192.27	0.660269	111.589	0.742829		335.689	192.27	0.803987	143.418	0.774631			KO:K02923	RP-L38e, RPL38; large subunit ribosomal protein L38e	0.617833	2.63689	-2.09355	2.01906	0.496611		0.617833	117.32	-7.56902	116.702	0.994198		2.63689	117.32	-5.47546	114.683	0.902743
KO:K00656	E2.3.1.54, pflD; formate C-acetyltransferase [EC:2.3.1.54]	54.5459	78.5906	-0.526886	24.0447	0.61681		54.5459	0.0187795	11.5041	54.5271	0.999519		78.5906	0.0187795	12.031	78.5718	0.999836			KO:K02927	RP-L40e, RPL40; large subunit ribosomal protein L40e	9.67688	19.6635	-1.0229	9.98659	0.697273		9.67688	256.184	-4.72649	246.507	0.898035		19.6635	256.184	-3.70359	236.52	0.90272
KO:K00657	speG, SAT; diamine N-acetyltransferase [EC:2.3.1.57]	3.92811	2.57067	0.611695	1.35745	0.377074		3.92811	0.0187795	7.70854	3.90933	0.695944		2.57067	0.0187795	7.09684	2.55189	0.588898			KO:K02944	RP-LX, rplX; large subunit ribosomal protein LX	0.388219	4.19836	-3.43488	3.81014	0.56643		0.388219	72.4255	-7.54348	72.0373	0.994		4.19836	72.4255	-4.1086	68.2271	0.902438
KO:K00658	DLST, sucB; 2-oxoglutarate dehydrogenase E2 component (dihydrolipoamide succinyltransferase) [EC:2.3.1.61]	217.981	188.666	0.208368	29.315	0.429324		217.981	153.188	0.508899	64.793	0.689097		188.666	153.188	0.300531	35.478	0.561876			KO:K02974	RP-S24e, RPS24; small subunit ribosomal protein S24e	8.34284	40.7213	-2.28718	32.3785	0.852571		8.34284	283.085	-5.08455	274.742	0.898035		40.7213	283.085	-2.79738	242.364	0.900797
KO:K00661	maa; maltose O-acetyltransferase [EC:2.3.1.79]	32.0881	19.9957	0.682346	12.0924	0.638605		32.0881	54.1475	-0.754857	22.0594	0.751411		19.9957	54.1475	-1.4372	34.1518	0.860293			KO:K03042	rpoA2; DNA-directed RNA polymerase subunit A" [EC:2.7.7.6]	1.58554	9.95002	-2.64972	8.36447	0.744673		1.58554	122.491	-6.27156	120.906	0.967813		9.95002	122.491	-3.62184	112.541	0.902685
KO:K00662	aacC; aminoglycoside 3-N-acetyltransferase [EC:2.3.1.81]	10.7253	14.8094	-0.465495	4.08411	0.470179		10.7253	12.5235	-0.223611	1.79813	0.398766		14.8094	12.5235	0.241884	2.28598	0.400352			KO:K03052	rpoG; DNA-directed RNA polymerase subunit G [EC:2.7.7.6]	0.0284763	0.22887	-3.0067	0.200394	0.2862		0.0187795	77.3255	-12.0076	77.3067	0.999843		0.22887	77.3255	-8.40027	77.0966	0.999472
KO:K00663	aacA; aminoglycoside 6'-N-acetyltransferase [EC:2.3.1.82]	10.3955	0.0284763	8.51198	10.367	0.914784		10.3955	0.0187795	9.11259	10.3767	0.908708		NA	NA	NA	NA	NA			KO:K03073	secE; preprotein translocase subunit SecE	164.514	188.081	-0.193149	23.5677	0.417413		164.514	5.50786	4.90057	159.006	0.898035		188.081	5.50786	5.09372	182.574	0.902767
KO:K00666	K00666; fatty-acyl-CoA synthase [EC:6.2.1.-]	193.134	213.212	-0.142687	20.0781	0.376617		193.134	320.794	-0.732044	127.66	0.754035		213.212	320.794	-0.589357	107.582	0.730117			KO:K03087	SIG2, rpoS; RNA polymerase nonessential primary-like sigma factor	88.6411	0.587109	7.2382	88.054	0.997078		88.6411	0.0187795	12.2046	88.6223	0.999895		0.587109	0.0187795	4.9664	0.568329	0.308921
KO:K00668	FAS1; fatty acid synthase subunit beta, fungi type [EC:2.3.1.86]	0.0284763	0.363981	-3.67603	0.335505	0.2862		NA	NA	NA	NA	NA		0.363981	0.0187795	4.27663	0.345201	0.308921			KO:K03089	SIG3.3.1, rpoH; RNA polymerase sigma-32 factor	8.6696	16.7236	-0.947843	8.05395	0.629236		8.6696	0.0187795	8.85067	8.65082	0.87488		16.7236	0.0187795	9.79851	16.7048	0.958511
KO:K00672	ftr; formylmethanofuran--tetrahydromethanopterin N-formyltransferase [EC:2.3.1.101]	3.54923	23.7079	-2.73979	20.1587	0.845939		3.54923	0.377483	3.23302	3.17174	0.59977		23.7079	0.377483	5.97281	23.3304	0.950129			KO:K03098	APOD; apolipoprotein D and lipocalin family protein	9.70663	31.8297	-1.71333	22.1231	0.827707		9.70663	0.0187795	9.01367	9.68785	0.893038		31.8297	0.0187795	10.727	31.8109	0.993939
KO:K00674	dapD; 2,3,4,5-tetrahydropyridine-2,6-dicarboxylate N-succinyltransferase [EC:2.3.1.117]	99.2008	46.5007	1.0931	52.7001	0.789326		99.2008	0.0187795	12.367	99.182	0.999948		46.5007	0.0187795	11.2739	46.4819	0.998781			KO:K03149	thiG; thiazole synthase [EC:2.8.1.10]	140.203	136.679	0.0367302	3.52444	0.300438		140.203	17.665	2.98856	122.538	0.89723		136.679	17.665	2.95183	119.014	0.901676
KO:K00675	nhoA; N-hydroxyarylamine O-acetyltransferase [EC:2.3.1.118]	8.99438	0.0284763	8.30312	8.96591	0.880541		8.99438	0.0187795	8.90372	8.9756	0.874911		NA	NA	NA	NA	NA			KO:K03150	thiH; 2-iminoacetate synthase [EC:4.1.99.19]	17.2415	7.01075	1.29824	10.2307	0.721757		17.2415	0.0187795	9.84251	17.2227	0.968085		7.01075	0.0187795	8.54427	6.99197	0.803834
KO:K00677	lpxA; UDP-N-acetylglucosamine acyltransferase [EC:2.3.1.129]	140.733	142.981	-0.0228647	2.24818	0.289832		140.733	102.942	0.451129	37.7909	0.661123		142.981	102.942	0.473994	40.0391	0.666131			KO:K03163	TOP1; DNA topoisomerase I [EC:5.99.1.2]	19.739	42.5077	-1.10668	22.7687	0.777727		19.739	1.99287	3.30813	17.7461	0.865952		42.5077	1.99287	4.41481	40.5148	0.900715
KO:K00680	ytmI; uncharacterized N-acetyltransferase [EC:2.3.1.-]	34.8914	44.8213	-0.361314	9.92993	0.506915		34.8914	101.399	-1.5391	66.5078	0.858018		44.8213	101.399	-1.17779	56.5779	0.846952			KO:K03185	ubiH; 2-octaprenyl-6-methoxyphenol hydroxylase [EC:1.14.13.-]	33.9293	0.347528	6.60926	33.5818	0.979899		33.9293	0.0187795	10.8192	33.9106	0.995902		0.347528	0.0187795	4.2099	0.328749	0.308921
KO:K00681	ggt; gamma-glutamyltranspeptidase / glutathione hydrolase [EC:2.3.2.2 3.4.19.13]	197.848	156.491	0.338313	41.357	0.524231		197.848	233.917	-0.241605	36.069	0.533023		156.491	233.917	-0.579918	77.426	0.729894			KO:K03188	ureF; urease accessory protein	12.2706	0.632525	4.27795	11.6381	0.793202		12.2706	0.0187795	9.35184	12.2519	0.93317		0.632525	0.0187795	5.07389	0.613745	0.308921
KO:K00682	GGCT; gamma-glutamylcyclotransferase [EC:4.3.2.9]	2.72021	1.82908	0.572604	0.891137	0.2862		2.72021	0.0187795	7.17842	2.70143	0.624409		1.82908	0.0187795	6.60581	1.8103	0.482345			KO:K03189	ureG; urease accessory protein	17.7902	0.738656	4.59003	17.0515	0.837359		17.7902	0.0187795	9.88771	17.7714	0.968085		0.738656	0.0187795	5.29767	0.719877	0.308921
KO:K00683	QPCT; glutaminyl-peptide cyclotransferase [EC:2.3.2.5]	21.2757	6.80621	1.64428	14.4695	0.794692		21.2757	0.0187795	10.1458	21.2569	0.982218		6.80621	0.0187795	8.50155	6.78743	0.803623			KO:K03190	ureD, ureH; urease accessory protein	15.0138	0.980838	3.93613	14.033	0.819848		15.0138	0.0187795	9.64292	14.995	0.957359		0.980838	0.0187795	5.70679	0.962059	0.308921
KO:K00684	aat; leucyl/phenylalanyl-tRNA---protein transferase [EC:2.3.2.6]	100.268	23.2245	2.11014	77.0432	0.854928		100.268	0.0187795	12.3824	100.249	0.999948		23.2245	0.0187795	10.2723	23.2057	0.983763			KO:K03192	ureJ; urease accessory protein	36.0314	3.44995	3.38461	32.5814	0.862398		36.0314	0.0187795	10.9059	36.0126	0.997198		3.44995	0.0187795	7.52128	3.43117	0.663283
KO:K00685	ATE1; arginyl-tRNA---protein transferase [EC:2.3.2.8]	7.89404	0.785841	3.32845	7.1082	0.723861		7.89404	0.0187795	8.71546	7.87526	0.852666		0.785841	0.0187795	5.38701	0.767061	0.308921			KO:K03215	rumA; 23S rRNA (uracil1939-C5)-methyltransferase [EC:2.1.1.190]	158.886	167.719	-0.0780569	8.83331	0.328905		158.886	26.1338	2.604	132.752	0.895934		167.719	26.1338	2.68206	141.585	0.900703
KO:K00688	PYG, glgP; glycogen phosphorylase [EC:2.4.1.1]	242.381	179.197	0.435734	63.1845	0.584914		242.381	188.332	0.364002	54.0495	0.615482		179.197	188.332	-0.0717321	9.13504	0.357831			KO:K03216	trmL, cspR; tRNA (cytidine/uridine-2'-O-)-methyltransferase [EC:2.1.1.207]	55.1864	6.64885	3.05314	48.5376	0.864842		55.1864	0.0187795	11.5209	55.1676	0.99955		6.64885	0.0187795	8.4678	6.63007	0.803623
KO:K00690	E2.4.1.7; sucrose phosphorylase [EC:2.4.1.7]	30.2958	3.68549	3.03919	26.6103	0.858171		30.2958	0.0187795	10.6557	30.277	0.994428		3.68549	0.0187795	7.61656	3.66671	0.663283			KO:K03223	yscL, sctL; type III secretion protein L	2.78976	21.8824	-2.97156	19.0926	0.84403		2.78976	0.0187795	7.21484	2.77098	0.624409		21.8824	0.0187795	10.1864	21.8636	0.978781
KO:K00691	mapA; maltose phosphorylase [EC:2.4.1.8]	2.86467	3.80319	-0.408842	0.938523	0.2862		2.86467	0.0187795	7.25307	2.84589	0.624409		3.80319	0.0187795	7.66191	3.78441	0.663283			KO:K03239	EIF2B1; translation initiation factor eIF-2B subunit alpha	2.24424	6.8478	-1.60941	4.60356	0.606584		2.24424	63.314	-4.81823	61.0697	0.8977		6.8478	63.314	-3.20881	56.4662	0.901805
KO:K00692	sacB; levansucrase [EC:2.4.1.10]	0.25796	0.0284763	3.17932	0.229484	0.2862		0.25796	0.0187795	3.77992	0.239181	0.348547		NA	NA	NA	NA	NA			KO:K03243	EIF5B; translation initiation factor 5B	24.4981	80.398	-1.71449	55.8999	0.840631		24.4981	488.961	-4.31898	464.463	0.898035		80.398	488.961	-2.60449	408.563	0.90068
KO:K00693	GYS; glycogen synthase [EC:2.4.1.11]	7.18516	3.39249	1.08267	3.79266	0.535888		7.18516	0.0187795	8.57972	7.16638	0.852666		3.39249	0.0187795	7.49705	3.37371	0.663283			KO:K03282	mscL; large conductance mechanosensitive channel	85.4105	35.6247	1.26153	49.7857	0.802279		85.4105	0.0187795	12.151	85.3917	0.999885		35.6247	0.0187795	10.8895	35.6059	0.996272
KO:K00694	bcsA; cellulose synthase (UDP-forming) [EC:2.4.1.12]	126.43	19.759	2.67775	106.671	0.863674		126.43	3.95559	4.9983	122.474	0.898035		19.759	3.95559	2.32055	15.8034	0.850774			KO:K03286	TC.OOP; OmpA-OmpF porin, OOP family	11.778	1.68583	2.80457	10.0922	0.77872		11.778	0.0187795	9.29272	11.7592	0.921984		1.68583	0.0187795	6.48815	1.66705	0.482345
KO:K00695	E2.4.1.13; sucrose synthase [EC:2.4.1.13]	0.0284763	0.156238	-2.45591	0.127761	0.2862		NA	NA	NA	NA	NA		0.156238	0.0187795	3.05651	0.137458	0.308921			KO:K03292	TC.GPH; glycoside/pentoside/hexuronide:cation symporter, GPH family	140.273	54.5667	1.36214	85.7062	0.812203		140.273	6.87926	4.34984	133.394	0.898035		54.5667	6.87926	2.9877	47.6874	0.900586
KO:K00696	E2.4.1.14; sucrose-phosphate synthase [EC:2.4.1.14]	6.65861	0.652081	3.3521	6.00652	0.696046		6.65861	0.0187795	8.46992	6.63983	0.826406		0.652081	0.0187795	5.11782	0.633302	0.308921			KO:K03297	emrE, qac, mmr, smr; small multidrug resistance pump	28.6418	0.52962	5.75702	28.1122	0.950224		28.6418	0.0187795	10.5748	28.623	0.99285		0.52962	0.0187795	4.81773	0.510841	0.308921
KO:K00697	otsA; trehalose 6-phosphate synthase [EC:2.4.1.15]	30.0009	14.1226	1.087	15.8783	0.752483		30.0009	0.0187795	10.6416	29.9821	0.993749		14.1226	0.0187795	9.55463	14.1038	0.944033			KO:K03299	TC.GNTP; gluconate:H+ symporter, GntP family	15.9659	6.85495	1.21977	9.11094	0.707012		15.9659	0.0187795	9.73162	15.9471	0.957359		6.85495	0.0187795	8.51185	6.83618	0.803623
KO:K00700	GBE1, glgB; 1,4-alpha-glucan branching enzyme [EC:2.4.1.18]	91.0874	195.129	-1.09911	104.042	0.790446		91.0874	141.365	-0.634102	50.2776	0.735187		195.129	141.365	0.465005	53.7643	0.666893			KO:K03303	lctP; lactate permease	49.1852	7.04487	2.80358	42.1403	0.862612		49.1852	0.0187795	11.3549	49.1664	0.999289		7.04487	0.0187795	8.55127	7.02609	0.833798
KO:K00701	cgt; cyclomaltodextrin glucanotransferase [EC:2.4.1.19]	17.5453	0.250275	6.13142	17.295	0.954412		17.5453	0.0187795	9.86771	17.5265	0.968085		0.250275	0.0187795	3.73629	0.231495	0.308921			KO:K03304	tehA; tellurite resistance protein	46.6011	0.345007	7.0776	46.2561	0.992287		46.6011	0.0187795	11.277	46.5823	0.999091		0.345007	0.0187795	4.1994	0.326227	0.308921
KO:K00702	E2.4.1.20; cellobiose phosphorylase [EC:2.4.1.20]	27.9463	6.66958	2.06699	21.2768	0.839638		27.9463	0.0187795	10.5393	27.9276	0.991846		6.66958	0.0187795	8.47229	6.6508	0.803623			KO:K03305	TC.POT; proton-dependent oligopeptide transporter, POT family	17.9864	5.34154	1.75158	12.6449	0.779762		17.9864	0.0187795	9.90354	17.9676	0.968085		5.34154	0.0187795	8.15196	5.32276	0.766729
KO:K00703	glgA; starch synthase [EC:2.4.1.21]	309.216	269.689	0.197319	39.5272	0.423091		309.216	224.683	0.460725	84.5332	0.667249		269.689	224.683	0.263406	45.006	0.537362			KO:K03309	TC.DAACS; dicarboxylate/amino acid:cation (Na+ or H+) symporter, DAACS family	17.4143	10.656	0.708614	6.75836	0.565504		17.4143	0.135904	7.00154	17.2784	0.954746		10.656	0.135904	6.29293	10.5201	0.863247
KO:K00705	malQ; 4-alpha-glucanotransferase [EC:2.4.1.25]	167.933	149.504	0.167702	18.4291	0.39964		167.933	25.4602	2.72157	142.473	0.896028		149.504	25.4602	2.55386	124.044	0.899097			KO:K03313	nhaA; Na+:H+ antiporter, NhaA family	123.974	113.91	0.122141	10.0638	0.358707		123.974	0.400894	8.2726	123.573	0.99908		113.91	0.400894	8.15046	113.509	0.999062
KO:K00712	tagE; poly(glycerol-phosphate) alpha-glucosyltransferase [EC:2.4.1.52]	1.07961	0.0284763	5.24461	1.05114	0.494595		1.07961	0.0187795	5.84521	1.06083	0.524096		NA	NA	NA	NA	NA			KO:K03316	TC.CPA1; monovalent cation:H+ antiporter, CPA1 family	14.1116	0.430524	5.03465	13.6811	0.812554		14.1116	0.0187795	9.55351	14.0929	0.950951		0.430524	0.0187795	4.51886	0.411745	0.308921
KO:K00720	UGCG; ceramide glucosyltransferase [EC:2.4.1.80]	38.486	20.3947	0.916138	18.0913	0.709233		38.486	0.0187795	11.001	38.4672	0.997669		20.3947	0.0187795	10.0848	20.3759	0.975733			KO:K03325	ACR3, arsB; arsenite transporter	96.0095	34.0961	1.49357	61.9133	0.81715		96.0095	0.0187795	12.3198	95.9907	0.999937		34.0961	0.0187795	10.8262	34.0774	0.995826
KO:K00721	DPM1; dolichol-phosphate mannosyltransferase [EC:2.4.1.83]	528.298	456.028	0.21223	72.2702	0.429558		528.298	645.393	-0.288826	117.095	0.56958		456.028	645.393	-0.501056	189.365	0.681407			KO:K03328	TC.PST; polysaccharide transporter, PST family	161.083	104.536	0.623801	56.5466	0.668611		161.083	12.9192	3.64022	148.164	0.898024		104.536	12.9192	3.01642	91.6169	0.902098
KO:K00728	POMT; dolichyl-phosphate-mannose-protein mannosyltransferase [EC:2.4.1.109]	0.467105	0.102467	2.18859	0.364638	0.2862		0.467105	0.0187795	4.63652	0.448325	0.348547		0.102467	0.0187795	2.44793	0.0836873	0.308921			KO:K03330	gatE; glutamyl-tRNA(Gln) amidotransferase subunit E [EC:6.3.5.7]	20.7373	83.0504	-2.00176	62.3131	0.854733		20.7373	577.804	-4.80028	557.067	0.898035		83.0504	577.804	-2.79852	494.754	0.900797
KO:K00729	ALG5; dolichyl-phosphate beta-glucosyltransferase [EC:2.4.1.117]	97.1256	108.711	-0.162571	11.5851	0.389316		97.1256	74.7492	0.377794	22.3764	0.617656		108.711	74.7492	0.540364	33.9615	0.692263			KO:K03333	choD; cholesterol oxidase [EC:1.1.3.6]	11.6158	0.0284763	8.67212	11.5874	0.927269		11.6158	0.0187795	9.27272	11.5971	0.921984		NA	NA	NA	NA	NA
KO:K00737	MGAT3; beta-1,4-mannosyl-glycoprotein beta-1,4-N-acetylglucosaminyltransferase [EC:2.4.1.144]	0.247032	1.01557	-2.03951	0.768533	0.2862		0.247032	0.0187795	3.71747	0.228253	0.348547		1.01557	0.0187795	5.75698	0.996786	0.482345			KO:K03336	iolD; 3D-(3,5/4)-trihydroxycyclohexane-1,2-dione acylhydrolase (decyclizing) [EC:3.7.1.22]	18.2379	16.2565	0.165923	1.98141	0.328058		18.2379	0.0187795	9.92357	18.2192	0.972413		16.2565	0.0187795	9.75765	16.2378	0.958511
KO:K00743	GGTA1; N-acetyllactosaminide 3-alpha-galactosyltransferase [EC:2.4.1.87]	2.29443	13.5559	-2.56271	11.2615	0.788294		2.29443	8.99815	-1.97149	6.70372	0.709126		13.5559	8.99815	0.591221	4.55776	0.537866			KO:K03342	pabBC; para-aminobenzoate synthetase / 4-amino-4-deoxychorismate lyase [EC:2.6.1.85 4.1.3.38]	73.7112	25.6173	1.52477	48.094	0.817141		73.7112	0.0187795	11.9385	73.6925	0.999812		25.6173	0.0187795	10.4137	25.5985	0.987702
KO:K00748	lpxB; lipid-A-disaccharide synthase [EC:2.4.1.182]	186.636	140.806	0.406513	45.8294	0.554957		186.636	98.5438	0.921389	88.092	0.78824		140.806	98.5438	0.514876	42.2626	0.686084			KO:K03366	butA, budC; meso-butanediol dehydrogenase / (S,S)-butanediol dehydrogenase / diacetyl reductase [EC:1.1.1.- 1.1.1.76 1.1.1.304]	27.1915	2.60808	3.3821	24.5834	0.856009		27.1915	0.0187795	10.4998	27.1727	0.991846		2.60808	0.0187795	7.11769	2.5893	0.588898
KO:K00752	hasA; hyaluronan synthase [EC:2.4.1.212]	2.7482	0.73965	1.89357	2.00855	0.496611		2.7482	4.41931	-0.685337	1.67111	0.432051		0.73965	4.41931	-2.57891	3.67966	0.571606			KO:K03387	ahpF; alkyl hydroperoxide reductase subunit F [EC:1.6.4.-]	53.9071	63.1126	-0.227451	9.20545	0.438235		53.9071	6.42074	3.06966	47.4864	0.896791		63.1126	6.42074	3.29712	56.6918	0.901805
KO:K00754	bshA; L-malate glycosyltransferase [EC:2.4.1.-]	349.135	148.838	1.23004	200.297	0.801286		349.135	59.423	2.55469	289.712	0.893791		148.838	59.423	1.32465	89.415	0.860586			KO:K03392	ACMSD; aminocarboxymuconate-semialdehyde decarboxylase [EC:4.1.1.45]	19.8059	65.8063	-1.7323	46.0004	0.840193		19.8059	3.62337	2.45053	16.1825	0.856879		65.8063	3.62337	4.18282	62.1829	0.902321
KO:K00756	pdp; pyrimidine-nucleoside phosphorylase [EC:2.4.2.2]	121.437	183.368	-0.594527	61.9304	0.663859		121.437	105.118	0.208197	16.319	0.506795		183.368	105.118	0.802724	78.2494	0.774467			KO:K03402	argR, ahrC; transcriptional regulator of arginine metabolism	24.3797	36.1721	-0.569193	11.7923	0.585294		24.3797	0.0187795	10.3423	24.361	0.98779		36.1721	0.0187795	10.9115	36.1533	0.996753
KO:K00757	udp, UPP; uridine phosphorylase [EC:2.4.2.3]	65.0629	71.7536	-0.141217	6.69072	0.371484		65.0629	104.075	-0.677717	39.0121	0.746331		71.7536	104.075	-0.5365	32.3214	0.691911			KO:K03403	chlH, bchH; magnesium chelatase subunit H [EC:6.6.1.1]	201.962	0.499161	8.66036	201.463	0.999981		201.962	0.0187795	13.3926	201.943	1		0.499161	0.0187795	4.73228	0.480382	0.308921
KO:K00758	deoA, TYMP; thymidine phosphorylase [EC:2.4.2.4]	34.9981	29.0431	0.26908	5.95498	0.43135		34.9981	0.0187795	10.8639	34.9793	0.996477		29.0431	0.0187795	10.5948	29.0244	0.992333			KO:K03408	cheW; purine-binding chemotaxis protein CheW	276.798	158.299	0.806182	118.499	0.718212		276.798	22.5439	3.61803	254.254	0.898024		158.299	22.5439	2.81185	135.755	0.901688
KO:K00759	APRT, apt; adenine phosphoribosyltransferase [EC:2.4.2.7]	234.385	272.047	-0.214976	37.6621	0.42946		234.385	564.983	-1.26933	330.598	0.846174		272.047	564.983	-1.05435	292.936	0.840258			KO:K03409	cheX; chemotaxis protein CheX	58.5463	38.8558	0.591448	19.6905	0.651675		58.5463	0.0187795	11.6062	58.5275	0.999592		38.8558	0.0187795	11.0148	38.837	0.997444
KO:K00760	hprT, hpt, HPRT1; hypoxanthine phosphoribosyltransferase [EC:2.4.2.8]	283.571	385.458	-0.442866	101.887	0.585051		283.571	129.099	1.13523	154.472	0.838679		385.458	129.099	1.5781	256.359	0.882016			KO:K03420	psmR; proteasome regulatory subunit	0.472382	4.85212	-3.36059	4.37974	0.618777		0.472382	73.927	-7.29	73.4546	0.986473		4.85212	73.927	-3.92941	69.0748	0.902462
KO:K00761	upp, UPRT; uracil phosphoribosyltransferase [EC:2.4.2.9]	180.27	146.525	0.29901	33.7447	0.495997		180.27	30.9869	2.54043	149.283	0.893791		146.525	30.9869	2.24142	115.538	0.895053			KO:K03428	bchM, chlM; magnesium-protoporphyrin O-methyltransferase [EC:2.1.1.11]	86.3728	1.39649	5.95071	84.9764	0.955746		86.3728	0.0187795	12.1672	86.3541	0.999895		1.39649	0.0187795	6.2165	1.37771	0.482345
KO:K00762	pyrE; orotate phosphoribosyltransferase [EC:2.4.2.10]	214.458	274.148	-0.354259	59.6898	0.530016		214.458	209.77	0.0318858	4.68785	0.362116		274.148	209.77	0.386145	64.3777	0.620106			KO:K03431	glmM; phosphoglucosamine mutase [EC:5.4.2.10]	142.027	151.693	-0.0949879	9.66584	0.336794		142.027	18.2176	2.96276	123.809	0.89723		151.693	18.2176	3.05775	133.475	0.902169
KO:K00763	pncB, NAPRT1; nicotinate phosphoribosyltransferase [EC:6.3.4.21]	247.754	317.729	-0.358884	69.9741	0.53845		247.754	512.325	-1.04815	264.57	0.834163		317.729	512.325	-0.689264	194.596	0.751348			KO:K03435	fruR1, fruR; LacI family transcriptional regulator, fructose operon transcriptional repressor	11.8716	0.0284763	8.70353	11.8431	0.927269		11.8716	0.0187795	9.30414	11.8528	0.921984		NA	NA	NA	NA	NA
KO:K00764	purF, PPAT; amidophosphoribosyltransferase [EC:2.4.2.14]	262.459	270.452	-0.0432798	7.99288	0.300779		262.459	118.011	1.15318	144.449	0.838909		270.452	118.011	1.19646	152.441	0.848136			KO:K03453	TC.BASS; bile acid:Na+ symporter, BASS family	81.9713	10.8092	2.92285	71.162	0.864794		81.9713	0.0187795	12.0917	81.9525	0.999843		10.8092	0.0187795	9.16889	10.7905	0.89687
KO:K00765	hisG; ATP phosphoribosyltransferase [EC:2.4.2.17]	222.647	241.379	-0.116546	18.7327	0.35931		222.647	467.451	-1.07006	244.804	0.834706		241.379	467.451	-0.953513	226.071	0.794748			KO:K03473	pdxB; erythronate-4-phosphate dehydrogenase [EC:1.1.1.290]	9.49151	21.9993	-1.21275	12.5078	0.7373		9.49151	0.0187795	8.98134	9.47274	0.893038		21.9993	0.0187795	10.1941	21.9805	0.978781
KO:K00766	trpD; anthranilate phosphoribosyltransferase [EC:2.4.2.18]	252.833	259.285	-0.0363517	6.4516	0.30074		252.833	313.766	-0.311502	60.9326	0.579626		259.285	313.766	-0.27515	54.481	0.548675			KO:K03495	gidA, mnmG, MTO1; tRNA uridine 5-carboxymethylaminomethyl modification enzyme	293.147	147.053	0.995291	146.094	0.78767		293.147	20.5329	3.83562	272.614	0.898035		147.053	20.5329	2.84033	126.52	0.901688
KO:K00767	nadC, QPRT; nicotinate-nucleotide pyrophosphorylase (carboxylating) [EC:2.4.2.19]	237.12	225.651	0.0715234	11.4689	0.321426		237.12	102.772	1.20617	134.348	0.841522		225.651	102.772	1.13465	122.879	0.843751			KO:K03534	rhaM; L-rhamnose mutarotase [EC:5.1.3.32]	58.0853	5.02686	3.53044	53.0584	0.865514		58.0853	0.0187795	11.5948	58.0665	0.999592		5.02686	0.0187795	8.06436	5.00808	0.766729
KO:K00768	E2.4.2.21, cobU, cobT; nicotinate-nucleotide--dimethylbenzimidazole phosphoribosyltransferase [EC:2.4.2.21]	80.9893	52.5009	0.625389	28.4884	0.667374		80.9893	16.6488	2.28232	64.3405	0.888752		52.5009	16.6488	1.65693	35.8521	0.87837			KO:K03537	POP5; ribonuclease P/MRP protein subunit POP5 [EC:3.1.26.5]	7.97887	14.6298	-0.874653	6.65092	0.587544		7.97887	157.213	-4.30039	149.234	0.898035		14.6298	157.213	-3.42574	142.583	0.902591
KO:K00769	gpt; xanthine phosphoribosyltransferase [EC:2.4.2.22]	2.1648	0.268288	3.01238	1.89651	0.404723		2.1648	0.0187795	6.84893	2.14602	0.624409		0.268288	0.0187795	3.83655	0.249508	0.308921			KO:K03548	perM; putative permease	4.19104	14.7028	-1.81072	10.5118	0.76006		4.19104	0.229383	4.19148	3.96165	0.59977		14.7028	0.229383	6.00219	14.4735	0.91041
KO:K00772	mtaP, MTAP; 5'-methylthioadenosine phosphorylase [EC:2.4.2.28]	243.512	310.2	-0.349205	66.6879	0.530035		243.512	605.362	-1.3138	361.85	0.846529		310.2	605.362	-0.964598	295.162	0.795029			KO:K03558	cvpA; membrane protein required for colicin V production	71.222	40.5406	0.812957	30.6815	0.71457		71.222	0.370522	7.58662	70.8515	0.994		40.5406	0.370522	6.77367	40.1701	0.985557
KO:K00773	tgt, QTRT1; queuine tRNA-ribosyltransferase [EC:2.4.2.29]	354.436	245.393	0.530433	109.043	0.621504		354.436	98.9522	1.84072	255.484	0.878957		245.393	98.9522	1.31029	146.441	0.853529			KO:K03567	gcvR; glycine cleavage system transcriptional repressor	7.54102	12.4591	-0.724372	4.91811	0.513888		7.54102	0.0187795	8.64946	7.52224	0.852666		12.4591	0.0187795	9.37383	12.4403	0.924912
KO:K00777	NA	12.6388	6.11561	1.04729	6.52318	0.639092		12.6388	0.28868	5.45224	12.3501	0.831225		6.11561	0.28868	4.40495	5.82693	0.67041			KO:K03571	mreD; rod shape-determining protein MreD	38.726	27.8529	0.475479	10.8732	0.555619		38.726	0.0187795	11.0099	38.7073	0.997669		27.8529	0.0187795	10.5345	27.8341	0.990199
KO:K00782	lldG; L-lactate dehydrogenase complex protein LldG	97.6248	114.491	-0.229915	16.8662	0.445627		97.6248	320.029	-1.71288	222.404	0.875936		114.491	320.029	-1.48297	205.538	0.86517			KO:K03581	recD; exodeoxyribonuclease V alpha subunit [EC:3.1.11.5]	45.7793	16.3481	1.48557	29.4311	0.812524		45.7793	0.0187795	11.2513	45.7605	0.999049		16.3481	0.0187795	9.76575	16.3294	0.958511
KO:K00783	rlmH; 23S rRNA (pseudouridine1915-N3)-methyltransferase [EC:2.1.1.177]	25.0718	30.8828	-0.300737	5.81099	0.440699		25.0718	0.205005	6.93427	24.8668	0.974451		30.8828	0.205005	7.23501	30.6778	0.98075			KO:K03584	recO; DNA repair protein RecO (recombination protein O)	178.245	167.834	0.0868233	10.4106	0.33695		178.245	16.2586	3.45458	161.986	0.897962		167.834	16.2586	3.36776	151.575	0.902579
KO:K00784	rnz; ribonuclease Z [EC:3.1.26.11]	193.858	273.295	-0.495462	79.4376	0.61044		193.858	628.066	-1.69592	434.208	0.875925		273.295	628.066	-1.20046	354.771	0.848136			KO:K03585	acrA, mexA, adeI, smeD, mtrC, cmeA; membrane fusion protein, multidrug efflux system	54.4973	77.5822	-0.509541	23.0849	0.611083		54.4973	5.73916	3.24727	48.7581	0.897115		77.5822	5.73916	3.75682	71.843	0.90245
KO:K00786	E2.4.-.-; glycosyltransferase [EC:2.4.-.-]	34.8294	68.6034	-0.977973	33.774	0.731194		34.8294	40.6079	-0.221453	5.77846	0.478256		68.6034	40.6079	0.75652	27.9955	0.761454			KO:K03606	wcaJ; putative colanic acid biosysnthesis UDP-glucose lipid carrier transferase	6.78357	13.8542	-1.03021	7.07062	0.661765		6.78357	0.23184	4.87084	6.55173	0.724901		13.8542	0.23184	5.90105	13.6223	0.901512
KO:K00788	thiE; thiamine-phosphate pyrophosphorylase [EC:2.5.1.3]	229.271	313.153	-0.449814	83.882	0.5888		229.271	168.996	0.440066	60.2752	0.658771		313.153	168.996	0.88988	144.157	0.790281			KO:K03612	rnfG; electron transport complex protein RnfG	11.7546	14.2773	-0.280489	2.52263	0.37761		11.7546	0.0187795	9.28986	11.7359	0.921984		14.2773	0.0187795	9.57035	14.2585	0.944033
KO:K00789	metK; S-adenosylmethionine synthetase [EC:2.5.1.6]	354.097	405.057	-0.193978	50.9594	0.417754		354.097	418.216	-0.2401	64.118	0.53365		405.057	418.216	-0.046122	13.1586	0.339812			KO:K03613	rnfE; electron transport complex protein RnfE	22.8938	24.468	-0.0959418	1.57424	0.313148		22.8938	0.0187795	10.2516	22.875	0.98411		24.468	0.0187795	10.3475	24.4492	0.985803
KO:K00790	murA; UDP-N-acetylglucosamine 1-carboxyvinyltransferase [EC:2.5.1.7]	284.324	304.16	-0.0972928	19.8357	0.344176		284.324	123.383	1.2044	160.942	0.841449		304.16	123.383	1.30169	180.777	0.853529			KO:K03614	rnfD; electron transport complex protein RnfD	24.4603	28.4946	-0.220251	4.03438	0.401402		24.4603	0.0187795	10.3471	24.4415	0.98779		28.4946	0.0187795	10.5673	28.4759	0.991243
KO:K00791	miaA, TRIT1; tRNA dimethylallyltransferase [EC:2.5.1.75]	287.648	282.293	0.0271097	5.35473	0.29552		287.648	118.265	1.28228	169.383	0.846373		282.293	118.265	1.25517	164.028	0.852954			KO:K03615	rnfC; electron transport complex protein RnfC	62.2586	42.9594	0.5353	19.2992	0.614063		62.2586	0.0187795	11.6949	62.2398	0.999686		42.9594	0.0187795	11.1596	42.9406	0.998347
KO:K00793	ribE, RIB5; riboflavin synthase [EC:2.5.1.9]	195.098	274.069	-0.490343	78.9715	0.607382		195.098	203.139	-0.058268	8.04095	0.38479		274.069	203.139	0.432075	70.9305	0.650422			KO:K03617	rnfA; electron transport complex protein RnfA	11.4985	14.6386	-0.348329	3.14008	0.419838		11.4985	0.0187795	9.25808	11.4797	0.921984		14.6386	0.0187795	9.60641	14.6198	0.944033
KO:K00794	ribH, RIB4; 6,7-dimethyl-8-ribityllumazine synthase [EC:2.5.1.78]	172.838	246.325	-0.511143	73.4871	0.616264		172.838	191.339	-0.146708	18.5008	0.4613		246.325	191.339	0.364434	54.9864	0.604959			KO:K03620	hyaC; Ni/Fe-hydrogenase 1 B-type cytochrome subunit	33.2228	49.6934	-0.580879	16.4706	0.643319		33.2228	1.97802	4.07005	31.2448	0.893017		49.6934	1.97802	4.65093	47.7154	0.901653
KO:K00795	ispA; farnesyl diphosphate synthase [EC:2.5.1.1 2.5.1.10]	7.71762	5.37923	0.520757	2.33839	0.412748		7.71762	0.0187795	8.68286	7.69884	0.852666		5.37923	0.0187795	8.1621	5.36045	0.766729			KO:K03640	pal; peptidoglycan-associated lipoprotein	49.5746	48.7239	0.0249715	0.850699	0.2862		49.5746	5.19568	3.25422	44.3789	0.89677		48.7239	5.19568	3.22924	43.5282	0.900879
KO:K00796	folP; dihydropteroate synthase [EC:2.5.1.15]	199.296	289.565	-0.538971	90.2685	0.624815		199.296	479.761	-1.2674	280.465	0.846174		289.565	479.761	-0.72843	190.196	0.756928			KO:K03642	rlpA; rare lipoprotein A	103.326	87.1794	0.245143	16.1465	0.456379		103.326	11.3589	3.1853	91.967	0.897794		87.1794	11.3589	2.94016	75.8205	0.901524
KO:K00797	speE, SRM; spermidine synthase [EC:2.5.1.16]	264.321	479.357	-0.858808	215.036	0.724718		264.321	470.691	-0.832488	206.37	0.778183		479.357	470.691	0.0263204	8.66604	0.323716			KO:K03651	cpdA; 3',5'-cyclic-AMP phosphodiesterase [EC:3.1.4.53]	41.8145	0.0284763	10.52	41.786	0.998831		41.8145	0.0187795	11.1206	41.7957	0.998401		NA	NA	NA	NA	NA
KO:K00798	MMAB, pduO; cob(I)alamin adenosyltransferase [EC:2.5.1.17]	212.707	206.055	0.0458418	6.65255	0.307382		212.707	415.214	-0.964986	202.507	0.790205		206.055	415.214	-1.01083	209.16	0.839754			KO:K03676	grxC, GLRX, GLRX2; glutaredoxin 3	41.3475	2.39362	4.11053	38.9539	0.864307		41.3475	0.0187795	11.1044	41.3288	0.998401		2.39362	0.0187795	6.99389	2.37484	0.588898
KO:K00799	GST, gst; glutathione S-transferase [EC:2.5.1.18]	59.6726	4.12019	3.85629	55.5524	0.865621		59.6726	0.0187795	11.6337	59.6539	0.999603		4.12019	0.0187795	7.77741	4.10141	0.721208			KO:K03684	rnd; ribonuclease D [EC:3.1.13.5]	73.8235	1.40272	5.71778	72.4208	0.955736		73.8235	0.0187795	11.9407	73.8047	0.999812		1.40272	0.0187795	6.22293	1.38394	0.482345
KO:K00800	aroA; 3-phosphoshikimate 1-carboxyvinyltransferase [EC:2.5.1.19]	264.132	261.543	0.0142125	2.58928	0.286833		264.132	371.615	-0.492551	107.483	0.681142		261.543	371.615	-0.506763	110.073	0.68728			KO:K03688	ubiB, aarF; ubiquinone biosynthesis protein	129.429	69.8482	0.889862	59.5804	0.729499		129.429	0.0187795	12.7507	129.41	1		69.8482	0.0187795	11.8609	69.8294	0.999707
KO:K00801	FDFT1; farnesyl-diphosphate farnesyltransferase [EC:2.5.1.21]	13.2882	0.0284763	8.86616	13.2597	0.94663		13.2882	0.0187795	9.46677	13.2694	0.942578		NA	NA	NA	NA	NA			KO:K03689	petN; cytochrome b6-f complex subunit 8	19.5224	0.0284763	9.42115	19.4939	0.979168		19.5224	0.0187795	10.0218	19.5036	0.976301		NA	NA	NA	NA	NA
KO:K00803	AGPS, agpS; alkyldihydroxyacetonephosphate synthase [EC:2.5.1.26]	30.9023	85.7892	-1.47308	54.8869	0.816527		30.9023	106.912	-1.79063	76.0094	0.876636		85.7892	106.912	-0.317553	21.1226	0.577292			KO:K03694	clpA; ATP-dependent Clp protease ATP-binding subunit ClpA	21.5508	14.8874	0.533654	6.66345	0.522439		21.5508	0.0187795	10.1644	21.532	0.982218		14.8874	0.0187795	9.63072	14.8686	0.944033
KO:K00804	GGPS1; geranylgeranyl diphosphate synthase, type III [EC:2.5.1.1 2.5.1.10 2.5.1.29]	0.812112	38.3842	-5.56269	37.5721	0.953993		0.812112	306.892	-8.56184	306.08	0.999791		38.3842	306.892	-2.99915	268.508	0.902169			KO:K03705	hrcA; heat-inducible transcriptional repressor	228.306	143.527	0.669648	84.7792	0.679392		228.306	8.8573	4.68796	219.449	0.898035		143.527	8.8573	4.01831	134.67	0.902755
KO:K00805	hepST; heptaprenyl diphosphate synthase [EC:2.5.1.30]	81.6002	38.1349	1.09746	43.4653	0.789423		81.6002	0.312364	8.0292	81.2879	0.997313		38.1349	0.312364	6.93174	37.8226	0.984818			KO:K03716	splB; spore photoproduct lyase [EC:4.1.99.14]	10.9119	19.8829	-0.865629	8.97103	0.62649		10.9119	0.0187795	9.18253	10.8931	0.908708		19.8829	0.0187795	10.0482	19.8641	0.972438
KO:K00806	uppS; undecaprenyl diphosphate synthase [EC:2.5.1.31]	226.234	238.419	-0.0756823	12.1848	0.329178		226.234	186.613	0.27777	39.6215	0.562544		238.419	186.613	0.353452	51.8063	0.597444			KO:K03767	PPIA; peptidyl-prolyl cis-trans isomerase A (cyclophilin A) [EC:5.2.1.8]	23.0253	14.7413	0.643358	8.28404	0.590134		23.0253	0.0187795	10.2599	23.0066	0.986159		14.7413	0.0187795	9.61649	14.7225	0.944033
KO:K00809	DHPS, dys; deoxyhypusine synthase [EC:2.5.1.46]	175.024	231.686	-0.404622	56.6625	0.55412		175.024	748.013	-2.09551	572.989	0.888365		231.686	748.013	-1.69089	516.327	0.882204			KO:K03768	PPIB, ppiB; peptidyl-prolyl cis-trans isomerase B (cyclophilin B) [EC:5.2.1.8]	149.013	44.0538	1.7581	104.959	0.841683		149.013	0.0187795	12.954	148.994	1		44.0538	0.0187795	11.1959	44.0351	0.998581
KO:K00812	aspB; aspartate aminotransferase [EC:2.6.1.1]	283.969	359.358	-0.339688	75.3889	0.524513		283.969	588.327	-1.05089	304.359	0.834163		359.358	588.327	-0.711199	228.97	0.755264			KO:K03770	ppiD; peptidyl-prolyl cis-trans isomerase D [EC:5.2.1.8]	39.9407	64.6629	-0.695079	24.7222	0.681837		39.9407	6.13786	2.70205	33.8028	0.89193		64.6629	6.13786	3.39713	58.525	0.902063
KO:K00813	aspC; aspartate aminotransferase [EC:2.6.1.1]	1.55394	0.0284763	5.77003	1.52547	0.494595		1.55394	0.0187795	6.37063	1.53516	0.524096		NA	NA	NA	NA	NA			KO:K03771	surA; peptidyl-prolyl cis-trans isomerase SurA [EC:5.2.1.8]	67.0301	112.736	-0.750069	45.706	0.704139		67.0301	5.21716	3.68347	61.8129	0.89769		112.736	5.21716	4.43354	107.519	0.902743
KO:K00814	GPT, ALT; alanine transaminase [EC:2.6.1.2]	0.711286	0.265804	1.42007	0.445482	0.2862		0.711286	0.0187795	5.2432	0.692507	0.348547		0.265804	0.0187795	3.82313	0.247024	0.308921			KO:K03778	ldhA; D-lactate dehydrogenase [EC:1.1.1.28]	158.665	69.2306	1.19651	89.4348	0.797205		158.665	0.513559	8.27124	158.152	0.99908		69.2306	0.513559	7.07474	68.717	0.98728
KO:K00816	CCBL; kynurenine---oxoglutarate transaminase / cysteine-S-conjugate beta-lyase / glutamine---phenylpyruvate transaminase [EC:2.6.1.7 4.4.1.13 2.6.1.64]	1.76875	0.0284763	5.95683	1.74028	0.494595		1.76875	0.0187795	6.55743	1.74998	0.524096		NA	NA	NA	NA	NA			KO:K03782	katG; catalase-peroxidase [EC:1.11.1.21]	46.2694	40.5677	0.189726	5.70167	0.396776		46.2694	0.717258	6.01142	45.5521	0.966862		40.5677	0.717258	5.8217	39.8504	0.96408
KO:K00817	hisC; histidinol-phosphate aminotransferase [EC:2.6.1.9]	326.371	309.011	0.0788557	17.3602	0.329246		326.371	472.489	-0.533768	146.118	0.693791		309.011	472.489	-0.612623	163.478	0.732661			KO:K03783	punA, PNP; purine-nucleoside phosphorylase [EC:2.4.2.1]	125.354	189.919	-0.599379	64.5652	0.665076		125.354	12.2336	3.35708	113.12	0.897951		189.919	12.2336	3.95646	177.685	0.902755
KO:K00818	E2.6.1.11, argD; acetylornithine aminotransferase [EC:2.6.1.11]	127.243	113.043	0.170715	14.2001	0.399172		127.243	82.9855	0.616658	44.2577	0.733149		113.043	82.9855	0.445943	30.0577	0.654889			KO:K03784	deoD; purine-nucleoside phosphorylase [EC:2.4.2.1]	12.2697	4.0455	1.60071	8.2242	0.724328		12.2697	0.0187795	9.35173	12.2509	0.93317		4.0455	0.0187795	7.75102	4.02673	0.721208
KO:K00819	rocD, OAT; ornithine--oxo-acid transaminase [EC:2.6.1.13]	23.7278	39.4157	-0.732194	15.6879	0.661112		23.7278	17.1526	0.468146	6.57514	0.569538		39.4157	17.1526	1.20034	22.2631	0.829824			KO:K03790	rimJ; ribosomal-protein-alanine N-acetyltransferase [EC:2.3.1.128]	13.0461	1.53504	3.08727	11.511	0.792783		13.0461	0.0187795	9.44024	13.0273	0.942578		1.53504	0.0187795	6.35298	1.51626	0.482345
KO:K00820	glmS, GFPT; glucosamine---fructose-6-phosphate aminotransferase (isomerizing) [EC:2.6.1.16]	542.347	432.28	0.327251	110.067	0.520199		542.347	676.155	-0.318137	133.808	0.595024		432.28	676.155	-0.645388	243.875	0.742696			KO:K03802	cphA; cyanophycin synthetase [EC:6.3.2.29 6.3.2.30]	88.6232	8.21875	3.43069	80.4044	0.865767		88.6232	0.0187795	12.2043	88.6044	0.999895		8.21875	0.0187795	8.77362	8.19997	0.858335
KO:K00821	argD; acetylornithine/N-succinyldiaminopimelate aminotransferase [EC:2.6.1.11 2.6.1.17]	142.177	159.125	-0.162472	16.948	0.3903		142.177	94.9002	0.583208	47.2771	0.729155		159.125	94.9002	0.74568	64.2251	0.768499			KO:K03814	mtgA; monofunctional glycosyltransferase [EC:2.4.1.129]	20.3619	47.7312	-1.22906	27.3694	0.794936		20.3619	0.121276	7.39143	20.2406	0.973824		47.7312	0.121276	8.6205	47.61	0.998734
KO:K00822	E2.6.1.18; beta-alanine--pyruvate transaminase [EC:2.6.1.18]	1.94397	0.232022	3.06667	1.71194	0.404723		1.94397	0.0187795	6.6937	1.92519	0.524096		0.232022	0.0187795	3.62703	0.213242	0.308921			KO:K03821	phbC, phaC; polyhydroxyalkanoate synthase [EC:2.3.1.-]	39.4206	54.356	-0.463491	14.9354	0.573968		39.4206	3.65892	3.42946	35.7617	0.894805		54.356	3.65892	3.89295	50.6971	0.901899
KO:K00823	puuE; 4-aminobutyrate aminotransferase [EC:2.6.1.19]	155.548	181.003	-0.21865	25.4546	0.441741		155.548	317.003	-1.02713	161.455	0.83363		181.003	317.003	-0.808483	136	0.780223			KO:K03828	yjgM; putative acetyltransferase [EC:2.3.1.-]	10.0311	0.863633	3.53792	9.16749	0.765943		10.0311	0.0187795	9.06111	10.0123	0.908708		0.863633	0.0187795	5.52319	0.844854	0.308921
KO:K00824	dat; D-alanine transaminase [EC:2.6.1.21]	6.13549	21.0334	-1.77743	14.8979	0.796114		6.13549	0.551961	3.47454	5.58353	0.691668		21.0334	0.551961	5.25197	20.4814	0.878499			KO:K03839	fldA, nifF, isiB; flavodoxin I	14.5582	0.0284763	8.99785	14.5297	0.953935		14.5582	0.0187795	9.59846	14.5394	0.950951		NA	NA	NA	NA	NA
KO:K00826	E2.6.1.42, ilvE; branched-chain amino acid aminotransferase [EC:2.6.1.42]	321.241	453.05	-0.496014	131.809	0.610489		321.241	697.234	-1.11799	375.993	0.837121		453.05	697.234	-0.621974	244.184	0.734807			KO:K03841	FBP, fbp; fructose-1,6-bisphosphatase I [EC:3.1.3.11]	91.5746	35.6321	1.36177	55.9425	0.81195		91.5746	0.146331	9.28957	91.4283	0.999895		35.6321	0.146331	7.9278	35.4858	0.993916
KO:K00829	NA	6.13412	4.41116	0.4757	1.72297	0.361034		6.13412	0.0187795	8.35156	6.11534	0.826406		4.41116	0.0187795	7.87586	4.39238	0.721208			KO:K03862	vanA; vanillate monooxygenase [EC:1.14.13.82]	12.4689	0.0284763	8.77436	12.4404	0.93733		12.4689	13.558	-0.120804	1.08904	0.381957		0.0187795	13.558	-9.49577	13.5392	0.935135
KO:K00830	AGXT; alanine-glyoxylate transaminase / serine-glyoxylate transaminase / serine-pyruvate transaminase [EC:2.6.1.44 2.6.1.45 2.6.1.51]	80.7292	209.169	-1.37351	128.44	0.81231		80.7292	356.175	-2.14142	275.446	0.88848		209.169	356.175	-0.767916	147.006	0.771102			KO:K03867	BGLUT; UDP-glucose:tetrahydrobiopterin glucosyltransferase [EC:2.4.1.-]	43.9679	0.0284763	10.5925	43.9394	0.998958		43.9679	0.0187795	11.1931	43.9491	0.998766		NA	NA	NA	NA	NA
KO:K00831	serC, PSAT1; phosphoserine aminotransferase [EC:2.6.1.52]	128.589	32.4565	1.98618	96.132	0.844975		128.589	0.0187795	12.7413	128.57	1		32.4565	0.0187795	10.7551	32.4378	0.994689			KO:K03918	lat; L-lysine 6-transaminase [EC:2.6.1.36]	25.3812	32.6985	-0.365465	7.3173	0.490582		25.3812	0.157274	7.33433	25.2239	0.983441		32.6985	0.157274	7.6998	32.5412	0.989132
KO:K00832	tyrB; aromatic-amino-acid transaminase [EC:2.6.1.57]	1.27307	0.128348	3.31018	1.14472	0.404723		1.27307	0.0187795	6.08301	1.25429	0.524096		0.128348	0.0187795	2.77283	0.109568	0.308921			KO:K03929	pnbA; para-nitrobenzyl esterase [EC:3.1.1.-]	25.5871	7.49441	1.77153	18.0927	0.81716		25.5871	0.0187795	10.412	25.5684	0.989233		7.49441	0.0187795	8.64051	7.47563	0.833798
KO:K00833	bioA; adenosylmethionine---8-amino-7-oxononanoate aminotransferase [EC:2.6.1.62]	61.5573	65.219	-0.0833624	3.6617	0.32539		61.5573	24.6534	1.32014	36.9039	0.851087		65.219	24.6534	1.40351	40.5656	0.85966			KO:K03975	dedA; membrane-associated protein	38.4378	46.4693	-0.273752	8.0315	0.457041		38.4378	0.623731	5.94546	37.8141	0.965221		46.4693	0.623731	6.21921	45.8456	0.965041
KO:K00835	avtA; valine--pyruvate aminotransferase [EC:2.6.1.66]	34.58	0.0284763	10.246	34.5515	0.997302		34.58	0.0187795	10.8466	34.5612	0.996477		NA	NA	NA	NA	NA			KO:K03976	ybaK, ebsC; Cys-tRNA(Pro)/Cys-tRNA(Cys) deacylase [EC:3.1.1.-]	14.3938	0.337592	5.41402	14.0562	0.90972		14.3938	0.0187795	9.58207	14.375	0.950951		0.337592	0.0187795	4.16805	0.318813	0.308921
KO:K00836	ectB, dat; diaminobutyrate-2-oxoglutarate transaminase [EC:2.6.1.76]	0.0956889	3.28591	-5.1018	3.19022	0.56643		0.0956889	194.668	-10.9904	194.573	1		3.28591	194.668	-5.88858	191.382	0.966366			KO:K03978	engB; GTP-binding protein	37.9937	62.0167	-0.706897	24.023	0.683074		37.9937	5.49382	2.78988	32.4999	0.891491		62.0167	5.49382	3.49677	56.5229	0.902028
KO:K00837	NA	119.785	105.669	0.180889	14.1155	0.405902		119.785	69.1105	0.793468	50.6744	0.769977		105.669	69.1105	0.61258	36.5588	0.729965			KO:K03981	dsbC; thiol:disulfide interchange protein DsbC [EC:5.3.4.1]	20.2264	68.0663	-1.7507	47.8398	0.840991		20.2264	10.1125	1.0001	10.1139	0.749038		68.0663	10.1125	2.7508	57.9537	0.900223
KO:K00839	pucG; (S)-ureidoglycine---glyoxylate transaminase [EC:2.6.1.112]	0.0284763	0.113044	-1.98905	0.0845673	0.2862		NA	NA	NA	NA	NA		0.113044	0.0187795	2.58965	0.0942641	0.308921			KO:K04014	nrfC; protein NrfC	0.446301	0.926528	-1.05382	0.480228	0.2862		0.446301	56.7878	-6.99142	56.3415	0.986222		0.926528	56.7878	-5.9376	55.8612	0.965709
KO:K00841	patA; aminotransferase [EC:2.6.1.-]	0.304048	0.1866	0.704348	0.117448	0.2862		0.304048	0.0187795	4.01707	0.285269	0.348547		0.1866	0.0187795	3.31272	0.167821	0.308921			KO:K04027	eutM; ethanolamine utilization protein EutM	19.1613	15.8325	0.275303	3.32876	0.40261		19.1613	0.0187795	9.99482	19.1425	0.976301		15.8325	0.0187795	9.71952	15.8137	0.951864
KO:K00845	glk; glucokinase [EC:2.7.1.2]	389.952	457.663	-0.230992	67.7118	0.447653		389.952	602.409	-0.627448	212.458	0.735773		457.663	602.409	-0.396457	144.746	0.624256			KO:K04028	eutN; ethanolamine utilization protein EutN	51.2792	61.2496	-0.256324	9.9703	0.460187		51.2792	0.245721	7.70521	51.0335	0.993623		61.2496	0.245721	7.96154	61.0038	0.997186
KO:K00846	KHK; ketohexokinase [EC:2.7.1.3]	0.165975	0.0284763	2.54313	0.137499	0.2862		0.165975	0.0187795	3.14374	0.147195	0.348547		NA	NA	NA	NA	NA			KO:K04035	E1.14.13.81, acsF, chlE; magnesium-protoporphyrin IX monomethyl ester (oxidative) cyclase [EC:1.14.13.81]	77.1161	8.39495	3.19944	68.7211	0.865582		77.1161	0.440417	7.45202	76.6757	0.994041		8.39495	0.440417	4.25258	7.95454	0.736717
KO:K00847	E2.7.1.4, scrK; fructokinase [EC:2.7.1.4]	170.987	46.4853	1.87904	124.501	0.844721		170.987	13.5225	3.66046	157.464	0.898024		46.4853	13.5225	1.78142	32.9628	0.878171			KO:K04036	bchJ; divinyl protochlorophyllide a 8-vinyl-reductase [EC:1.-.-.-]	34.1071	0.0284763	10.2261	34.0786	0.997302		34.1071	0.0187795	10.8267	34.0883	0.996477		NA	NA	NA	NA	NA
KO:K00848	rhaB; rhamnulokinase [EC:2.7.1.5]	61.5731	38.5391	0.675977	23.034	0.677269		61.5731	112.977	-0.875655	51.4037	0.784351		38.5391	112.977	-1.55163	74.4377	0.865557			KO:K04037	chlL; light-independent protochlorophyllide reductase subunit L [EC:1.3.7.7]	78.4226	0.0284763	11.4273	78.3941	0.999951		78.4226	0.0187795	12.0279	78.4038	0.999843		NA	NA	NA	NA	NA
KO:K00849	galK; galactokinase [EC:2.7.1.6]	174.232	200.747	-0.204367	26.5148	0.422867		174.232	293.747	-0.753561	119.515	0.76544		200.747	293.747	-0.549194	92.9998	0.6983			KO:K04038	chlN; light-independent protochlorophyllide reductase subunit N [EC:1.3.7.7]	67.8666	0.0284763	11.2187	67.8381	0.999883		67.8666	0.0187795	11.8193	67.8478	0.99976		NA	NA	NA	NA	NA
KO:K00850	pfkA, PFK; 6-phosphofructokinase 1 [EC:2.7.1.11]	388.673	360.727	0.10765	27.946	0.351315		388.673	151.547	1.35879	237.125	0.854192		360.727	151.547	1.25114	209.179	0.852028			KO:K04039	chlB; light-independent protochlorophyllide reductase subunit B [EC:1.3.7.7]	76.2184	0.0284763	11.3862	76.1899	0.999951		76.2184	0.0187795	11.9868	76.1996	0.999833		NA	NA	NA	NA	NA
KO:K00851	E2.7.1.12, gntK, idnK; gluconokinase [EC:2.7.1.12]	43.7021	69.8968	-0.677524	26.1947	0.680249		43.7021	136.447	-1.64257	92.7448	0.875423		69.8968	136.447	-0.965041	66.5501	0.794771			KO:K04040	chlG, bchG; chlorophyll/bacteriochlorophyll a synthase [EC:2.5.1.62 2.5.1.133]	95.3372	0.0284763	11.7091	95.3087	1		95.3372	0.0187795	12.3097	95.3184	0.999937		NA	NA	NA	NA	NA
KO:K00852	rbsK, RBKS; ribokinase [EC:2.7.1.15]	213.306	317.17	-0.572332	103.864	0.630853		213.306	611.537	-1.51951	398.231	0.858238		317.17	611.537	-0.947183	294.367	0.794748			KO:K04071	NA	0.0284763	0.807972	-4.82647	0.779495	0.2862		0.0187795	13.558	-9.49577	13.5392	0.942578		0.807972	13.558	-4.06869	12.75	0.827691
KO:K00853	araB; L-ribulokinase [EC:2.7.1.16]	18.8558	18.4265	0.0332257	0.429292	0.2862		18.8558	2.36664	2.9941	16.4891	0.860485		18.4265	2.36664	2.96087	16.0599	0.860223			KO:K04072	adhE; acetaldehyde dehydrogenase / alcohol dehydrogenase [EC:1.2.1.10 1.1.1.1]	48.7804	18.7138	1.3822	30.0666	0.808648		48.7804	0.0187795	11.3429	48.7617	0.999247		18.7138	0.0187795	9.96073	18.695	0.968382
KO:K00854	xylB, XYLB; xylulokinase [EC:2.7.1.17]	396.717	250.475	0.663444	146.242	0.678331		396.717	221.118	0.843291	175.598	0.778612		250.475	221.118	0.179847	29.3564	0.462427			KO:K04073	mhpF; acetaldehyde dehydrogenase [EC:1.2.1.10]	58.8738	46.9054	0.327872	11.9684	0.503827		58.8738	0.675213	6.44614	58.1986	0.967405		46.9054	0.675213	6.11827	46.2302	0.965147
KO:K00855	PRK, prkB; phosphoribulokinase [EC:2.7.1.19]	61.3435	18.243	1.74956	43.1005	0.840641		61.3435	0.126344	8.92341	61.2172	0.999592		18.243	0.126344	7.17385	18.1167	0.955991			KO:K04079	HSP90A, htpG; molecular chaperone HtpG	100.163	0.56088	7.48043	99.6017	0.998744		100.163	0.0187795	12.3809	100.144	0.999948		0.56088	0.0187795	4.90046	0.542101	0.308921
KO:K00856	E2.7.1.20, ADK; adenosine kinase [EC:2.7.1.20]	65.0708	4.58681	3.82645	60.484	0.865719		65.0708	0.38131	7.4149	64.6895	0.993937		4.58681	0.38131	3.58845	4.2055	0.626331			KO:K04101	ligB; protocatechuate 4,5-dioxygenase, beta chain [EC:1.13.11.8]	4.34747	27.3673	-2.65421	23.0199	0.852191		4.34747	184.205	-5.40499	179.858	0.898035		27.3673	184.205	-2.75079	156.838	0.900797
KO:K00857	tdk, TK; thymidine kinase [EC:2.7.1.21]	134.131	104.767	0.356459	29.3641	0.537369		134.131	15.8426	3.08177	118.289	0.897596		104.767	15.8426	2.72531	88.9248	0.900715			KO:K04102	pht5; 4,5-dihydroxyphthalate decarboxylase [EC:4.1.1.55]	4.26134	21.5998	-2.34164	17.3384	0.831973		4.26134	0.0187795	7.82601	4.24256	0.749843		21.5998	0.0187795	10.1676	21.581	0.978781
KO:K00858	ppnK, NADK; NAD+ kinase [EC:2.7.1.23]	289.894	398.095	-0.457588	108.201	0.593261		289.894	704.525	-1.28113	414.631	0.846373		398.095	704.525	-0.82354	306.43	0.781067			KO:K04108	hcrA, hbaC; 4-hydroxybenzoyl-CoA reductase subunit alpha [EC:1.3.7.9]	12.2865	24.5394	-0.998022	12.2529	0.730045		12.2865	0.115009	6.73918	12.1715	0.919852		24.5394	0.115009	7.73721	24.4244	0.983447
KO:K00859	coaE; dephospho-CoA kinase [EC:2.7.1.24]	252.698	241.305	0.0665544	11.3926	0.321426		252.698	182.529	0.469289	70.1689	0.670771		241.305	182.529	0.402735	58.7763	0.623904			KO:K04109	hcrB, hbaD; 4-hydroxybenzoyl-CoA reductase subunit beta [EC:1.3.7.9]	5.12955	24.5271	-2.25747	19.3975	0.835197		5.12955	0.161849	4.98611	4.9677	0.650408		24.5271	0.161849	7.24358	24.3652	0.973411
KO:K00860	cysC; adenylylsulfate kinase [EC:2.7.1.25]	47.271	105.122	-1.15303	57.8507	0.793709		47.271	159.55	-1.75498	112.279	0.876636		105.122	159.55	-0.601945	54.4279	0.730422			KO:K04112	bcrC, badD; benzoyl-CoA reductase subunit C [EC:1.3.7.8]	11.328	73.1103	-2.69018	61.7823	0.863489		11.328	0.41897	4.7569	10.909	0.806795		73.1103	0.41897	7.44708	72.6913	0.994209
KO:K00862	eryA; erythritol kinase (D-erythritol 1-phosphate-forming) [EC:2.7.1.215]	7.38572	0.0284763	8.01883	7.35725	0.857626		7.38572	0.0187795	8.61944	7.36694	0.852666		NA	NA	NA	NA	NA			KO:K04113	bcrB, badE; benzoyl-CoA reductase subunit B [EC:1.3.7.8]	15.1384	48.6435	-1.68403	33.5051	0.837466		15.1384	0.508954	4.89454	14.6295	0.848986		48.6435	0.508954	6.57857	48.1346	0.965346
KO:K00863	DAK, TKFC; triose/dihydroxyacetone kinase / FAD-AMP lyase (cyclizing) [EC:2.7.1.28 2.7.1.29 4.6.1.15]	15.5056	0.0284763	9.08881	15.4772	0.960742		15.5056	0.0187795	9.68942	15.4868	0.957359		NA	NA	NA	NA	NA			KO:K04117	aliB; cyclohexanecarboxyl-CoA dehydrogenase [EC:1.3.99.-]	0.344392	10.5155	-4.93232	10.1711	0.780717		0.344392	38.9268	-6.82057	38.5824	0.98433		10.5155	38.9268	-1.88825	28.4113	0.877374
KO:K00864	glpK, GK; glycerol kinase [EC:2.7.1.30]	133.565	101.865	0.390882	31.7	0.549679		133.565	97.7512	0.450358	35.814	0.66083		101.865	97.7512	0.059476	4.11407	0.346565			KO:K04127	cefD; isopenicillin-N epimerase [EC:5.1.1.17]	90.2444	3.53987	4.67207	86.7046	0.865875		90.2444	0.0187795	12.2305	90.2257	0.999906		3.53987	0.0187795	7.5584	3.5211	0.663283
KO:K00865	glxK, garK; glycerate 2-kinase [EC:2.7.1.165]	119.186	68.7319	0.794168	50.4545	0.710908		119.186	65.2126	0.869998	53.9739	0.783995		68.7319	65.2126	0.0758297	3.51933	0.358359			KO:K04343	strB; streptomycin 6-kinase [EC:2.7.1.72]	19.8913	0.0284763	9.44816	19.8628	0.979168		19.8913	0.0187795	10.0488	19.8725	0.976301		NA	NA	NA	NA	NA
KO:K00867	coaA; type I pantothenate kinase [EC:2.7.1.33]	7.87257	0.0284763	8.11093	7.84409	0.857626		7.87257	0.0187795	8.71153	7.85379	0.852666		NA	NA	NA	NA	NA			KO:K04486	E3.1.3.15B; histidinol-phosphatase (PHP family) [EC:3.1.3.15]	99.4086	61.0479	0.703429	38.3607	0.687748		99.4086	0.0187795	12.37	99.3898	0.999948		61.0479	0.0187795	11.6666	61.0291	0.999543
KO:K00868	pdxK, pdxY; pyridoxine kinase [EC:2.7.1.35]	1.78126	0.0284763	5.96699	1.75278	0.494595		1.78126	0.0187795	6.5676	1.76248	0.524096		NA	NA	NA	NA	NA			KO:K04649	HIP2, UBC1; ubiquitin-conjugating enzyme (huntingtin interacting protein 2) [EC:2.3.2.23]	1.7105	16.2057	-3.24401	14.4952	0.819624		1.7105	127.626	-6.22135	125.915	0.967813		16.2057	127.626	-2.97734	111.42	0.901676
KO:K00869	E2.7.1.36, MVK, mvaK1; mevalonate kinase [EC:2.7.1.36]	132.158	134.311	-0.0233059	2.15227	0.289832		132.158	291.89	-1.14316	159.732	0.838679		134.311	291.89	-1.11985	157.579	0.843587			KO:K04652	hypB; hydrogenase nickel incorporation protein HypB	89.4858	119.953	-0.422738	30.4672	0.577406		89.4858	15.1111	2.56605	74.3747	0.893613		119.953	15.1111	2.98879	104.842	0.901665
KO:K00870	E2.7.1.37; protein kinase [EC:2.7.1.37]	41.8416	0.0284763	10.521	41.8131	0.998831		41.8416	0.0187795	11.1216	41.8228	0.998401		NA	NA	NA	NA	NA			KO:K04744	lptD, imp, ostA; LPS-assembly protein	50.1951	54.289	-0.113114	4.09394	0.345199		50.1951	5.71018	3.13594	44.4849	0.896498		54.289	5.71018	3.24905	48.5788	0.901407
KO:K00872	thrB1; homoserine kinase [EC:2.7.1.39]	109.976	185.726	-0.755984	75.7498	0.70561		109.976	320.711	-1.54408	210.735	0.858258		185.726	320.711	-0.788097	134.985	0.774232			KO:K04748	norQ; nitric oxide reductase NorQ protein	12.4161	41.3002	-1.73393	28.884	0.835382		12.4161	2.99445	2.05185	9.4217	0.782187		41.3002	2.99445	3.78579	38.3057	0.900164
KO:K00873	PK, pyk; pyruvate kinase [EC:2.7.1.40]	367.07	284.983	0.365182	82.0875	0.542063		367.07	155.041	1.24341	212.029	0.845014		284.983	155.041	0.878225	129.942	0.78891			KO:K04757	rsbW; serine/threonine-protein kinase RsbW [EC:2.7.11.1]	277.888	62.936	2.14255	214.952	0.85521		277.888	0.0187795	13.8531	277.869	1		62.936	0.0187795	11.7105	62.9172	0.999555
KO:K00874	kdgK; 2-dehydro-3-deoxygluconokinase [EC:2.7.1.45]	65.2397	74.4309	-0.190151	9.19119	0.412758		65.2397	63.3404	0.0426263	1.89939	0.362294		74.4309	63.3404	0.232777	11.0906	0.496882			KO:K04761	oxyR; LysR family transcriptional regulator, hydrogen peroxide-inducible genes activator	18.3397	7.90494	1.21415	10.4348	0.716615		18.3397	0.0187795	9.9316	18.321	0.972413		7.90494	0.0187795	8.71745	7.88616	0.833798
KO:K00875	E2.7.1.47; D-ribulokinase [EC:2.7.1.47]	41.6253	18.8019	1.14658	22.8234	0.781058		41.6253	0.0187795	11.1141	41.6065	0.998401		18.8019	0.0187795	9.96751	18.7831	0.968382			KO:K04764	ihfA, himA; integration host factor subunit alpha	11.4972	17.2491	-0.585241	5.75191	0.533765		11.4972	0.194928	5.88219	11.3022	0.889829		17.2491	0.194928	6.46743	17.0541	0.930035
KO:K00876	udk, UCK; uridine kinase [EC:2.7.1.48]	70.2424	109.728	-0.643515	39.4854	0.67237		70.2424	16.3327	2.10458	53.9097	0.887842		109.728	16.3327	2.74809	93.3951	0.900739			KO:K04765	mazG; nucleoside triphosphate diphosphatase [EC:3.6.1.9]	13.5938	10.9265	0.315124	2.66736	0.390105		13.5938	0.0187795	9.49958	13.5751	0.942578		10.9265	0.0187795	9.18446	10.9077	0.89687
KO:K00878	thiM; hydroxyethylthiazole kinase [EC:2.7.1.50]	58.8939	31.4364	0.905681	27.4575	0.725097		58.8939	73.6512	-0.32259	14.7573	0.580253		31.4364	73.6512	-1.22827	42.2148	0.849988			KO:K04940	odh; opine dehydrogenase [EC:1.5.1.28]	59.244	31.4991	0.911359	27.7449	0.725097		59.244	0.147868	8.64621	59.0961	0.999394		31.4991	0.147868	7.73486	31.3512	0.991583
KO:K00879	fucK; L-fuculokinase [EC:2.7.1.51]	0.664133	3.40606	-2.35856	2.74192	0.496611		0.664133	0.34876	0.929238	0.315373	0.348547		3.40606	0.34876	3.2878	3.0573	0.571606			KO:K05299	fdhA; formate dehydrogenase (NADP+) alpha subunit [EC:1.17.1.10]	106.433	134.888	-0.341817	28.4551	0.523442		106.433	0.0187795	12.4685	106.414	0.999969		134.888	0.0187795	12.8103	134.869	1
KO:K00880	lyxK; L-xylulokinase [EC:2.7.1.53]	1.85084	0.457543	2.0162	1.3933	0.404723		1.85084	0.0187795	6.62288	1.83206	0.524096		0.457543	0.0187795	4.60668	0.438763	0.308921			KO:K05306	phnX; phosphonoacetaldehyde hydrolase [EC:3.11.1.1]	35.5626	0.125987	8.14094	35.4366	0.997517		35.5626	0.0187795	10.887	35.5438	0.996843		0.125987	0.0187795	2.74604	0.107207	0.308921
KO:K00881	alsK; allose kinase [EC:2.7.1.55]	0.0284763	2.88289	-6.66161	2.85441	0.613664		NA	NA	NA	NA	NA		2.88289	0.0187795	7.26221	2.86411	0.588898			KO:K05341	E2.4.1.4; amylosucrase [EC:2.4.1.4]	10.3589	0.0284763	8.50689	10.3304	0.914784		10.3589	0.0187795	9.1075	10.3401	0.908708		NA	NA	NA	NA	NA
KO:K00882	fruK; 1-phosphofructokinase [EC:2.7.1.56]	84.8886	81.4298	0.0600126	3.45872	0.312885		84.8886	160.316	-0.917275	75.4273	0.788177		81.4298	160.316	-0.977288	78.886	0.794982			KO:K05343	treS; maltose alpha-D-glucosyltransferase / alpha-amylase [EC:5.4.99.16 3.2.1.1]	79.5299	14.0024	2.50582	65.5274	0.860684		79.5299	0.0187795	12.0481	79.5111	0.999843		14.0024	0.0187795	9.5423	13.9836	0.935135
KO:K00883	dgoK; 2-dehydro-3-deoxygalactonokinase [EC:2.7.1.58]	0.921444	0.0284763	5.01606	0.892968	0.2862		0.921444	0.0187795	5.61667	0.902665	0.348547		NA	NA	NA	NA	NA			KO:K05346	deoR; deoxyribonucleoside regulator	11.4385	0.735467	3.95909	10.703	0.780717		11.4385	0.0187795	9.25052	11.4197	0.921984		0.735467	0.0187795	5.29143	0.716688	0.308921
KO:K00884	NAGK, nagK; N-acetylglucosamine kinase [EC:2.7.1.59]	37.8835	24.9625	0.601805	12.921	0.623705		37.8835	0.251145	7.23691	37.6323	0.984069		24.9625	0.251145	6.6351	24.7114	0.952169			KO:K05356	SPS, sds; all-trans-nonaprenyl-diphosphate synthase [EC:2.5.1.84 2.5.1.85]	31.2111	0.0284763	10.0981	31.1826	0.996212		31.2111	0.0187795	10.6987	31.1923	0.994982		NA	NA	NA	NA	NA
KO:K00885	nanK; N-acylmannosamine kinase [EC:2.7.1.60]	0.799305	1.01896	-0.350284	0.219658	0.2862		0.799305	0.0187795	5.41152	0.780525	0.348547		1.01896	0.0187795	5.7618	1.00018	0.482345			KO:K05359	ADT, PDT; arogenate/prephenate dehydratase [EC:4.2.1.91 4.2.1.51]	19.2172	0.0284763	9.39842	19.1887	0.979168		19.2172	0.0187795	9.99903	19.1984	0.976301		NA	NA	NA	NA	NA
KO:K00886	ppgK; polyphosphate glucokinase [EC:2.7.1.63]	1.30272	0.0284763	5.51562	1.27424	0.494595		1.30272	0.0187795	6.11623	1.28394	0.524096		NA	NA	NA	NA	NA			KO:K05364	pbpA; penicillin-binding protein A	130.044	21.1479	2.62041	108.896	0.863674		130.044	0.284983	8.83391	129.759	0.999895		21.1479	0.284983	6.2135	20.863	0.942098
KO:K00887	dgkA; undecaprenol kinase [EC:2.7.1.66]	20.5922	33.7209	-0.711544	13.1287	0.648968		20.5922	16.0593	0.358691	4.53293	0.504589		33.7209	16.0593	1.07023	17.6616	0.805733			KO:K05367	pbpC; penicillin-binding protein 1C [EC:2.4.1.129]	13.604	31.3074	-1.20247	17.7034	0.769575		13.604	0.0187795	9.50066	13.5852	0.942578		31.3074	0.0187795	10.7031	31.2886	0.993939
KO:K00891	E2.7.1.71, aroK, aroL; shikimate kinase [EC:2.7.1.71]	168.594	151.142	0.157644	17.4515	0.390397		168.594	214.675	-0.348603	46.0811	0.607945		151.142	214.675	-0.506247	63.5327	0.68694			KO:K05371	pcyA; phycocyanobilin:ferredoxin oxidoreductase [EC:1.3.7.5]	54.3728	0.0284763	10.8989	54.3443	0.999669		54.3728	0.0187795	11.4995	54.354	0.999519		NA	NA	NA	NA	NA
KO:K00893	DCK; deoxycitidine kinase [EC:2.7.1.74]	0.223025	0.494385	-1.14843	0.27136	0.2862		0.223025	0.0187795	3.56998	0.204246	0.348547		0.494385	0.0187795	4.71841	0.475606	0.308921			KO:K05382	cpeS; phycoerythrin-associated linker protein	18.4506	0.0284763	9.33969	18.4222	0.975312		18.4506	0.0187795	9.9403	18.4318	0.972413		NA	NA	NA	NA	NA
KO:K00895	pfp, PFP; diphosphate-dependent phosphofructokinase [EC:2.7.1.90]	8.96566	0.0284763	8.2985	8.93719	0.880444		8.96566	0.0187795	8.89911	8.94688	0.87488		NA	NA	NA	NA	NA			KO:K05516	cbpA; curved DNA-binding protein	270.518	116.183	1.21933	154.335	0.801276		270.518	12.9861	4.38069	257.532	0.898035		116.183	12.9861	3.16136	103.196	0.902134
KO:K00899	mtnK; 5-methylthioribose kinase [EC:2.7.1.100]	24.0012	0.179293	7.06464	23.8219	0.981535		24.0012	0.666976	5.16933	23.3342	0.884194		0.179293	0.666976	-1.89532	0.487683	0.308921			KO:K05527	bolA; BolA family transcriptional regulator, general stress-responsive regulator	21.4159	0.161601	7.0501	21.2543	0.977717		21.4159	0.0187795	10.1553	21.3971	0.982218		0.161601	0.0187795	3.10521	0.142821	0.308921
KO:K00901	dgkA, DGK; diacylglycerol kinase (ATP) [EC:2.7.1.107]	151.651	71.9353	1.07599	79.7159	0.789209		151.651	16.0593	3.23928	135.592	0.897867		71.9353	16.0593	2.16329	55.876	0.893681			KO:K05539	dusA; tRNA-dihydrouridine synthase A [EC:1.-.-.-]	15.8037	9.12125	0.792955	6.68241	0.578087		15.8037	0.0187795	9.71689	15.7849	0.957359		9.12125	0.0187795	8.92393	9.10247	0.879086
KO:K00904	DGUOK; deoxyguanosine kinase [EC:2.7.1.113]	0.223025	0.494385	-1.14843	0.27136	0.2862		0.223025	0.0187795	3.56998	0.204246	0.348547		0.494385	0.0187795	4.71841	0.475606	0.308921			KO:K05540	dusB; tRNA-dihydrouridine synthase B [EC:1.-.-.-]	51.6079	19.5771	1.39843	32.0309	0.809603		51.6079	0.0187795	11.4242	51.5892	0.999415		19.5771	0.0187795	10.0258	19.5583	0.972438
KO:K00906	aceK; isocitrate dehydrogenase kinase/phosphatase [EC:2.7.11.5 3.1.3.-]	1.0853	0.0284763	5.25219	1.05683	0.494595		1.0853	0.0187795	5.8528	1.06652	0.524096		NA	NA	NA	NA	NA			KO:K05559	phaA; multicomponent K+:H+ antiporter subunit A	49.6549	5.62507	3.14199	44.0298	0.864501		49.6549	0.0187795	11.3686	49.6361	0.999289		5.62507	0.0187795	8.22657	5.60629	0.766729
KO:K00912	lpxK; tetraacyldisaccharide 4'-kinase [EC:2.7.1.130]	102.962	129.165	-0.327096	26.2024	0.518952		102.962	85.9627	0.260334	16.9996	0.546707		129.165	85.9627	0.58743	43.202	0.728839			KO:K05563	phaF; multicomponent K+:H+ antiporter subunit F	23.0903	8.35092	1.46728	14.7394	0.771621		23.0903	0.0187795	10.2639	23.0716	0.986159		8.35092	0.0187795	8.79663	8.33214	0.858335
KO:K00917	lacC; tagatose 6-phosphate kinase [EC:2.7.1.144]	40.9353	71.0298	-0.795078	30.0945	0.708239		40.9353	160.138	-1.9679	119.203	0.879542		71.0298	160.138	-1.17282	89.1087	0.847374			KO:K05566	mnhB, mrpB; multicomponent Na+:H+ antiporter subunit B	84.6154	70.663	0.259964	13.9523	0.46867		84.6154	11.3795	2.89448	73.2358	0.897031		70.663	11.3795	2.63451	59.2835	0.900152
KO:K00918	pfkC; ADP-dependent phosphofructokinase/glucokinase [EC:2.7.1.146 2.7.1.147]	0.406126	0.200986	1.01483	0.20514	0.2862		0.406126	0.0187795	4.4347	0.387347	0.348547		0.200986	0.0187795	3.41987	0.182207	0.308921			KO:K05571	mnhG, mrpG; multicomponent Na+:H+ antiporter subunit G	91.9082	58.5927	0.649472	33.3155	0.674649		91.9082	0.521784	7.4606	91.3864	0.994135		58.5927	0.521784	6.81112	58.0709	0.987081
KO:K00919	ispE; 4-diphosphocytidyl-2-C-methyl-D-erythritol kinase [EC:2.7.1.148]	178.536	202.317	-0.180403	23.781	0.406876		178.536	116.418	0.616906	62.1184	0.733828		202.317	116.418	0.797309	85.8994	0.774549			KO:K05572	ndhA; NAD(P)H-quinone oxidoreductase subunit 1 [EC:1.6.5.3]	37.9988	0.0284763	10.382	37.9703	0.998208		37.9988	0.0187795	10.9826	37.98	0.997407		NA	NA	NA	NA	NA
KO:K00924	E2.7.1.-; kinase [EC:2.7.1.-]	196.712	56.2419	1.80637	140.47	0.844108		196.712	4.11381	5.57947	192.598	0.898035		56.2419	4.11381	3.7731	52.1281	0.901981			KO:K05573	ndhB; NAD(P)H-quinone oxidoreductase subunit 2 [EC:1.6.5.3]	56.6594	27.1318	1.06233	29.5276	0.78395		56.6594	0.0187795	11.5589	56.6406	0.999561		27.1318	0.0187795	10.4966	27.113	0.990199
KO:K00925	ackA; acetate kinase [EC:2.7.2.1]	97.6068	43.0342	1.1815	54.5726	0.796007		97.6068	0.498028	7.61461	97.1088	0.994156		43.0342	0.498028	6.43311	42.5362	0.964713			KO:K05575	ndhD; NAD(P)H-quinone oxidoreductase subunit 4 [EC:1.6.5.3]	171.793	0.0284763	12.5586	171.765	1		171.793	0.0187795	13.1592	171.775	1		NA	NA	NA	NA	NA
KO:K00926	arcC; carbamate kinase [EC:2.7.2.2]	65.7724	194.509	-1.56428	128.736	0.817764		65.7724	460.896	-2.80889	395.123	0.897219		194.509	460.896	-1.24461	266.387	0.851805			KO:K05577	ndhF; NAD(P)H-quinone oxidoreductase subunit 5 [EC:1.6.5.3]	147.684	0.0284763	12.3405	147.655	1		147.684	0.0187795	12.9411	147.665	1		NA	NA	NA	NA	NA
KO:K00927	PGK, pgk; phosphoglycerate kinase [EC:2.7.2.3]	307.287	365.889	-0.251815	58.601	0.458911		307.287	561.224	-0.868987	253.936	0.784508		365.889	561.224	-0.617172	195.335	0.734807			KO:K05579	ndhH; NAD(P)H-quinone oxidoreductase subunit H [EC:1.6.5.3]	37.0612	0.0284763	10.3459	37.0327	0.998208		37.0612	0.0187795	10.9465	37.0424	0.997407		NA	NA	NA	NA	NA
KO:K00928	lysC; aspartate kinase [EC:2.7.2.4]	328.835	366.148	-0.155065	37.3133	0.390855		328.835	396.324	-0.269316	67.4889	0.556366		366.148	396.324	-0.114252	30.1755	0.395193			KO:K05580	ndhI; NAD(P)H-quinone oxidoreductase subunit I [EC:1.6.5.3]	37.2904	2.35486	3.98509	34.9355	0.863216		37.2904	0.0187795	10.9554	37.2716	0.997407		2.35486	0.0187795	6.97034	2.33608	0.588898
KO:K00929	buk; butyrate kinase [EC:2.7.2.7]	9.82068	31.2352	-1.66928	21.4145	0.825088		9.82068	0.24	5.35472	9.58068	0.791146		31.2352	0.24	7.02399	30.9952	0.981547			KO:K05581	ndhJ; NAD(P)H-quinone oxidoreductase subunit J [EC:1.6.5.3]	32.8037	0.0284763	10.1699	32.7752	0.996582		32.8037	0.0187795	10.7705	32.7849	0.995463		NA	NA	NA	NA	NA
KO:K00930	argB; acetylglutamate kinase [EC:2.7.2.8]	192.754	176.351	0.128312	16.4031	0.368173		192.754	155	0.31449	37.7537	0.578863		176.351	155	0.186179	21.3507	0.472943			KO:K05582	ndhK; NAD(P)H-quinone oxidoreductase subunit K [EC:1.6.5.3]	32.9511	0.0284763	10.1764	32.9227	0.996582		32.9511	0.0187795	10.777	32.9324	0.995463		NA	NA	NA	NA	NA
KO:K00931	proB; glutamate 5-kinase [EC:2.7.2.11]	159.979	117.369	0.446835	42.6102	0.588265		159.979	76.4063	1.06612	83.5726	0.83457		117.369	76.4063	0.619283	40.9623	0.732966			KO:K05583	ndhL; NAD(P)H-quinone oxidoreductase subunit L [EC:1.6.5.3]	47.5025	0.0284763	10.704	47.474	0.999309		47.5025	0.0187795	11.3046	47.4837	0.999195		NA	NA	NA	NA	NA
KO:K00936	pdtaS; two-component system, sensor histidine kinase PdtaS [EC:2.7.13.3]	611.077	196.616	1.63597	414.461	0.840203		611.077	36.0227	4.08438	575.054	0.898035		196.616	36.0227	2.4484	160.593	0.898898			KO:K05584	ndhM; NAD(P)H-quinone oxidoreductase subunit M [EC:1.6.5.3]	47.9758	0.0284763	10.7183	47.9473	0.999309		47.9758	0.0187795	11.3189	47.957	0.999195		NA	NA	NA	NA	NA
KO:K00937	ppk; polyphosphate kinase [EC:2.7.4.1]	135.327	10.8928	3.635	124.434	0.865904		135.327	0.0187795	12.815	135.308	1		10.8928	0.0187795	9.18	10.874	0.89687			KO:K05585	ndhN; NAD(P)H-quinone oxidoreductase subunit N [EC:1.6.5.3]	33.004	0.0284763	10.1787	32.9755	0.996582		33.004	0.0187795	10.7793	32.9852	0.995463		NA	NA	NA	NA	NA
KO:K00938	E2.7.4.2, mvaK2; phosphomevalonate kinase [EC:2.7.4.2]	1.11308	1.40648	-0.337536	0.293403	0.2862		1.11308	0.0187795	5.88925	1.0943	0.524096		1.40648	0.0187795	6.22679	1.3877	0.482345			KO:K05589	ftsB; cell division protein FtsB	27.1921	53.7721	-0.98367	26.58	0.72724		27.1921	0.0187795	10.4998	27.1733	0.991846		53.7721	0.0187795	11.4835	53.7533	0.999297
KO:K00939	adk, AK; adenylate kinase [EC:2.7.4.3]	261.482	323.698	-0.307936	62.2157	0.500614		261.482	391.352	-0.581755	129.87	0.729877		323.698	391.352	-0.27382	67.6543	0.541782			KO:K05601	hcp; hydroxylamine reductase [EC:1.7.99.1]	14.3204	33.2261	-1.21424	18.9057	0.773383		14.3204	0.0187795	9.5747	14.3016	0.950951		33.2261	0.0187795	10.7889	33.2073	0.995252
KO:K00940	ndk, NME; nucleoside-diphosphate kinase [EC:2.7.4.6]	243.565	319.202	-0.390162	75.637	0.55076		243.565	363.279	-0.57677	119.714	0.729877		319.202	363.279	-0.186608	44.0769	0.47442			KO:K05685	macB; macrolide transport system ATP-binding/permease protein [EC:3.6.3.-]	13.4385	10.1622	0.403148	3.27621	0.425117		13.4385	0.0187795	9.48299	13.4197	0.942578		10.1622	0.0187795	9.07985	10.1435	0.89687
KO:K00941	thiD; hydroxymethylpyrimidine/phosphomethylpyrimidine kinase [EC:2.7.1.49 2.7.4.7]	211.472	263.687	-0.318357	52.2145	0.516722		211.472	623.896	-1.56084	412.424	0.85829		263.687	623.896	-1.24248	360.209	0.851805			KO:K05711	hcaB; 2,3-dihydroxy-2,3-dihydrophenylpropionate dehydrogenase [EC:1.3.1.87]	2.60547	16.3963	-2.65376	13.7909	0.810401		2.60547	0.0187795	7.11624	2.58669	0.624409		16.3963	0.0187795	9.77	16.3776	0.958511
KO:K00942	E2.7.4.8, gmk; guanylate kinase [EC:2.7.4.8]	215.044	242.281	-0.172052	27.2374	0.399961		215.044	117.924	0.866779	97.1203	0.784455		242.281	117.924	1.03883	124.358	0.839941			KO:K05713	mhpB; 2,3-dihydroxyphenylpropionate 1,2-dioxygenase [EC:1.13.11.16]	1.77037	15.6021	-3.13962	13.8318	0.812125		1.77037	108.146	-5.93279	106.376	0.967782		15.6021	108.146	-2.79316	92.5439	0.900727
KO:K00943	tmk, DTYMK; dTMP kinase [EC:2.7.4.9]	269.243	388.249	-0.528074	119.006	0.621504		269.243	759.884	-1.49687	490.641	0.858102		388.249	759.884	-0.968797	371.635	0.795135			KO:K05715	2PGK; 2-phosphoglycerate kinase [EC:2.7.2.-]	23.1798	5.16553	2.16588	18.0143	0.831262		23.1798	0.0187795	10.2695	23.1611	0.986159		5.16553	0.0187795	8.10362	5.14675	0.766729
KO:K00945	cmk; CMP/dCMP kinase [EC:2.7.4.25]	228.3	314.128	-0.460424	85.8284	0.593222		228.3	371.581	-0.702748	143.281	0.751579		314.128	371.581	-0.242324	57.4529	0.517022			KO:K05776	modF; molybdate transport system ATP-binding protein	19.2143	0.0284763	9.39821	19.1859	0.979168		19.2143	0.0187795	9.99881	19.1956	0.976301		NA	NA	NA	NA	NA
KO:K00946	thiL; thiamine-monophosphate kinase [EC:2.7.4.16]	175.613	235.038	-0.42049	59.4243	0.578633		175.613	355.458	-1.01728	179.844	0.833504		235.038	355.458	-0.596787	120.42	0.731032			KO:K05786	rarD; chloramphenicol-sensitive protein RarD	32.2669	0.233176	7.1125	32.0338	0.989618		32.2669	0.0187795	10.7467	32.2482	0.995463		0.233176	0.0187795	3.63419	0.214396	0.308921
KO:K00948	PRPS, prsA; ribose-phosphate pyrophosphokinase [EC:2.7.6.1]	343.826	369.585	-0.104229	25.7594	0.344235		343.826	505.577	-0.556252	161.751	0.700805		369.585	505.577	-0.452023	135.992	0.658792			KO:K05799	pdhR; GntR family transcriptional regulator, transcriptional repressor for pyruvate dehydrogenase complex	24.6919	69.1915	-1.48656	44.4996	0.816391		24.6919	0.0187795	10.3607	24.6731	0.98779		69.1915	0.0187795	11.8472	69.1727	0.999707
KO:K00949	thiN, TPK1, THI80; thiamine pyrophosphokinase [EC:2.7.6.2]	73.8988	61.1366	0.273515	12.7622	0.470316		73.8988	12.2687	2.59057	61.6301	0.895599		61.1366	12.2687	2.31706	48.8679	0.897808			KO:K05807	bamD; outer membrane protein assembly factor BamD	40.6412	75.0537	-0.884979	34.4125	0.725195		40.6412	5.60659	2.85775	35.0347	0.894062		75.0537	5.60659	3.74273	69.4471	0.902427
KO:K00950	folK; 2-amino-4-hydroxy-6-hydroxymethyldihydropteridine diphosphokinase [EC:2.7.6.3]	186.212	153.059	0.282854	33.1525	0.482869		186.212	105.419	0.820813	80.793	0.777127		153.059	105.419	0.537959	47.6405	0.694853			KO:K05813	ugpB; sn-glycerol 3-phosphate transport system substrate-binding protein	142.718	98.8584	0.529732	43.8596	0.620851		142.718	0.0187795	12.8917	142.699	1		98.8584	0.0187795	12.362	98.8396	0.999941
KO:K00951	relA; GTP pyrophosphokinase [EC:2.7.6.5]	292.97	245.491	0.255085	47.4795	0.473451		292.97	107.152	1.4511	185.818	0.856795		245.491	107.152	1.19601	138.339	0.848136			KO:K05814	ugpA; sn-glycerol 3-phosphate transport system permease protein	111.294	53.5796	1.05463	57.7149	0.788089		111.294	0.164146	9.40519	111.13	0.999969		53.5796	0.164146	8.35056	53.4155	0.998933
KO:K00952	nadM; nicotinamide-nucleotide adenylyltransferase [EC:2.7.7.1]	28.34	113.499	-2.00177	85.1595	0.85486		28.34	371.068	-3.71077	342.728	0.898035		113.499	371.068	-1.709	257.568	0.882544			KO:K05815	ugpE; sn-glycerol 3-phosphate transport system permease protein	206.209	54.2027	1.92767	152.006	0.844945		206.209	0.222173	9.85821	205.987	1		54.2027	0.222173	7.93054	53.9806	0.99694
KO:K00953	FLAD1; FAD synthetase [EC:2.7.7.2]	0.453538	0.0284763	3.99339	0.425062	0.2862		0.453538	0.0187795	4.59399	0.434758	0.348547		NA	NA	NA	NA	NA			KO:K05816	ugpC; sn-glycerol 3-phosphate transport system ATP-binding protein [EC:3.6.3.20]	2.84189	18.9746	-2.73915	16.1327	0.830113		2.84189	0.0187795	7.24155	2.82311	0.624409		18.9746	0.0187795	9.9807	18.9558	0.968382
KO:K00954	E2.7.7.3A, coaD, kdtB; pantetheine-phosphate adenylyltransferase [EC:2.7.7.3]	218.929	237.798	-0.119273	18.8689	0.35931		218.929	111.434	0.974269	107.495	0.790278		237.798	111.434	1.09354	126.363	0.841934			KO:K05824	LYS12; homoisocitrate dehydrogenase [EC:1.1.1.87]	51.8839	7.225	2.84422	44.6589	0.863878		51.8839	0.0187795	11.4319	51.8651	0.999415		7.225	0.0187795	8.5877	7.20622	0.833798
KO:K00955	cysNC; bifunctional enzyme CysN/CysC [EC:2.7.7.4 2.7.1.25]	6.59458	0.0284763	7.85538	6.5661	0.829431		6.59458	0.0187795	8.45598	6.5758	0.826406		NA	NA	NA	NA	NA			KO:K05832	ABC.X4.P; putative ABC transport system permease protein	4.89433	22.9613	-2.23002	18.067	0.83135		4.89433	0.0187795	8.02581	4.87556	0.749843		22.9613	0.0187795	10.2558	22.9425	0.981489
KO:K00956	cysN; sulfate adenylyltransferase subunit 1 [EC:2.7.7.4]	4.14485	0.220735	4.23093	3.92411	0.56643		4.14485	0.0187795	7.78602	4.12607	0.749843		0.220735	0.0187795	3.55508	0.201955	0.308921			KO:K05833	ABC.X4.A; putative ABC transport system ATP-binding protein	5.65211	16.9736	-1.58643	11.3215	0.768728		5.65211	0.0187795	8.23349	5.63333	0.792714		16.9736	0.0187795	9.81992	16.9548	0.958511
KO:K00957	cysD; sulfate adenylyltransferase subunit 2 [EC:2.7.7.4]	7.34358	0.0284763	8.01058	7.3151	0.857626		7.34358	0.0187795	8.61118	7.3248	0.852666		NA	NA	NA	NA	NA			KO:K05838	ybbN; putative thioredoxin	42.37	26.2506	0.690694	16.1194	0.661502		42.37	0.186098	7.83084	42.1839	0.996049		26.2506	0.186098	7.14015	26.0645	0.976694
KO:K00958	sat, met3; sulfate adenylyltransferase [EC:2.7.7.4]	146.121	160.538	-0.135752	14.4171	0.376276		146.121	88.8884	0.717097	57.2326	0.753418		160.538	88.8884	0.852849	71.6497	0.785498			KO:K05841	E2.4.1.173; sterol 3beta-glucosyltransferase [EC:2.4.1.173]	35.1573	0.0284763	10.2698	35.1288	0.997653		35.1573	0.0187795	10.8705	35.1385	0.996843		NA	NA	NA	NA	NA
KO:K00960	E2.7.7.6; DNA-directed RNA polymerase [EC:2.7.7.6]	0.254079	0.339547	-0.418338	0.0854689	0.2862		0.254079	0.0187795	3.75805	0.235299	0.348547		0.339547	0.0187795	4.17638	0.320768	0.308921			KO:K05845	opuC; osmoprotectant transport system substrate-binding protein	39.0629	3.3367	3.54931	35.7262	0.863518		39.0629	0.0187795	11.0224	39.0441	0.99792		3.3367	0.0187795	7.47312	3.31792	0.663283
KO:K00962	pnp, PNPT1; polyribonucleotide nucleotidyltransferase [EC:2.7.7.8]	301.565	294.693	0.033256	6.87197	0.29554		301.565	128.824	1.22707	172.741	0.844857		294.693	128.824	1.19381	165.869	0.848007			KO:K05886	sdh; serine 3-dehydrogenase (NADP+) [EC:1.1.1.276]	28.3763	2.32898	3.60692	26.0473	0.858629		28.3763	0.0187795	10.5613	28.3575	0.99285		2.32898	0.0187795	6.9544	2.3102	0.588898
KO:K00963	UGP2, galU, galF; UTP--glucose-1-phosphate uridylyltransferase [EC:2.7.7.9]	122.582	226.514	-0.885858	103.932	0.729704		122.582	389.596	-1.66824	267.015	0.875559		226.514	389.596	-0.78238	163.082	0.773247			KO:K05895	cobK-cbiJ; precorrin-6A/cobalt-precorrin-6A reductase [EC:1.3.1.54 1.3.1.106]	45.0701	0.0284763	10.6282	45.0416	0.999143		45.0701	0.0187795	11.2288	45.0513	0.999049		NA	NA	NA	NA	NA
KO:K00965	galT, GALT; UDPglucose--hexose-1-phosphate uridylyltransferase [EC:2.7.7.12]	283.213	235.995	0.263133	47.2183	0.473451		283.213	213.89	0.405016	69.3227	0.633117		235.995	213.89	0.141883	22.1044	0.42476			KO:K05916	hmp, YHB1; nitric oxide dioxygenase [EC:1.14.12.17]	11.304	0.12049	6.55178	11.1835	0.910255		11.304	0.0187795	9.23346	11.2852	0.921984		0.12049	0.0187795	2.68169	0.101711	0.308921
KO:K00966	GMPP; mannose-1-phosphate guanylyltransferase [EC:2.7.7.13]	142.747	113.55	0.330136	29.1973	0.519293		142.747	333.984	-1.22631	191.236	0.844857		113.55	333.984	-1.55645	220.434	0.865768			KO:K05919	dfx; superoxide reductase [EC:1.15.1.2]	22.376	95.5843	-2.09482	73.2082	0.854928		22.376	0.883701	4.66225	21.4923	0.880253		95.5843	0.883701	6.75707	94.7006	0.98755
KO:K00968	PCYT1; choline-phosphate cytidylyltransferase [EC:2.7.7.15]	0.228349	0.0284763	3.00341	0.199873	0.2862		0.228349	0.0187795	3.60401	0.20957	0.348547		NA	NA	NA	NA	NA			KO:K05939	aas; acyl-[acyl-carrier-protein]-phospholipid O-acyltransferase / long-chain-fatty-acid--[acyl-carrier-protein] ligase [EC:2.3.1.40 6.2.1.20]	11.6587	10.5369	0.145961	1.12183	0.324815		11.6587	0.0187795	9.27804	11.6399	0.921984		10.5369	0.0187795	9.13207	10.5181	0.89687
KO:K00969	nadD; nicotinate-nucleotide adenylyltransferase [EC:2.7.7.18]	210.677	248.616	-0.238882	37.9384	0.453399		210.677	107.637	0.968859	103.04	0.790268		248.616	107.637	1.20774	140.978	0.848136			KO:K05962	E2.7.13.1; protein-histidine pros-kinase [EC:2.7.13.1]	10.0208	0.0284763	8.45902	9.99236	0.90001		10.0208	0.0187795	9.05963	10.0021	0.908708		NA	NA	NA	NA	NA
KO:K00970	pcnB; poly(A) polymerase [EC:2.7.7.19]	216.283	300.241	-0.473197	83.9573	0.596484		216.283	122.472	0.820468	93.8112	0.777221		300.241	122.472	1.29366	177.768	0.853458			KO:K05966	citG; triphosphoribosyl-dephospho-CoA synthase [EC:2.4.2.52]	20.9075	57.7355	-1.46544	36.828	0.814842		20.9075	349.682	-4.06395	328.775	0.898035		57.7355	349.682	-2.59851	291.947	0.90068
KO:K00971	manC, cpsB; mannose-1-phosphate guanylyltransferase [EC:2.7.7.13]	119.016	168.903	-0.505042	49.8873	0.615972		119.016	67.9568	0.808462	51.059	0.776009		168.903	67.9568	1.3135	100.946	0.853482			KO:K06016	pydC; beta-ureidopropionase / N-carbamoyl-L-amino-acid hydrolase [EC:3.5.1.6 3.5.1.87]	34.2817	8.66271	1.98455	25.619	0.836511		34.2817	159.492	-2.21797	125.21	0.888992		8.66271	159.492	-4.20252	150.829	0.902767
KO:K00972	UAP1; UDP-N-acetylglucosamine/UDP-N-acetylgalactosamine diphosphorylase [EC:2.7.7.23 2.7.7.83]	6.19619	4.09845	0.596303	2.09774	0.435129		6.19619	0.0187795	8.36608	6.17741	0.826406		4.09845	0.0187795	7.76978	4.07967	0.721208			KO:K06039	ychN; uncharacterized protein involved in oxidation of intracellular sulfur	9.74505	13.5012	-0.470347	3.75616	0.443972		9.74505	0.0187795	9.01937	9.72627	0.893038		13.5012	0.0187795	9.48972	13.4824	0.935135
KO:K00973	E2.7.7.24, rfbA, rffH; glucose-1-phosphate thymidylyltransferase [EC:2.7.7.24]	358.906	425.183	-0.244479	66.2772	0.453545		358.906	527.92	-0.556716	169.015	0.700805		425.183	527.92	-0.312237	102.737	0.567339			KO:K06044	treY, glgY; (1->4)-alpha-D-glucan 1-alpha-D-glucosylmutase [EC:5.4.99.15]	43.3537	1.12547	5.26756	42.2283	0.954665		43.3537	0.0187795	11.1728	43.3349	0.998766		1.12547	0.0187795	5.90522	1.10669	0.482345
KO:K00974	cca; tRNA nucleotidyltransferase (CCA-adding enzyme) [EC:2.7.7.72 3.1.3.- 3.1.4.-]	368.604	351.087	0.0702416	17.5166	0.321484		368.604	238.649	0.627183	129.955	0.735773		351.087	238.649	0.556941	112.438	0.700492			KO:K06045	shc; squalene-hopene/tetraprenyl-beta-curcumene cyclase [EC:5.4.99.17 4.2.1.129]	32.4345	55.4203	-0.772884	22.9858	0.696572		32.4345	0.690037	5.55471	31.7445	0.893017		55.4203	0.690037	6.3276	54.7303	0.965698
KO:K00975	glgC; glucose-1-phosphate adenylyltransferase [EC:2.7.7.27]	219.244	103.724	1.07979	115.52	0.789258		219.244	81.6066	1.42578	137.637	0.856701		103.724	81.6066	0.345986	22.117	0.592028			KO:K06048	ybdK; carboxylate-amine ligase [EC:6.3.-.-]	127.76	50.8037	1.33044	76.9567	0.811852		127.76	0.0187795	12.732	127.742	1		50.8037	0.0187795	11.4016	50.7849	0.999156
KO:K00978	rfbF; glucose-1-phosphate cytidylyltransferase [EC:2.7.7.33]	57.9182	8.75668	2.72556	49.1615	0.863167		57.9182	15.7083	1.88249	42.2099	0.877964		8.75668	15.7083	-0.843072	6.95163	0.617022			KO:K06075	slyA; MarR family transcriptional regulator, transcriptional regulator for hemolysin	0.381631	21.6817	-5.82815	21.3	0.940466		0.381631	0.0187795	4.34495	0.362852	0.348547		21.6817	0.0187795	10.1731	21.6629	0.978781
KO:K00979	kdsB; 3-deoxy-manno-octulosonate cytidylyltransferase (CMP-KDO synthetase) [EC:2.7.7.38]	111.107	106.426	0.0621	4.68106	0.313566		111.107	39.6989	1.48478	71.408	0.857328		106.426	39.6989	1.42268	66.7269	0.863892			KO:K06076	fadL; long-chain fatty acid transport protein	24.4644	65.6251	-1.42356	41.1607	0.814414		24.4644	9.84194	1.31367	14.6225	0.798547		65.6251	9.84194	2.73723	55.7831	0.900129
KO:K00980	tagD; glycerol-3-phosphate cytidylyltransferase [EC:2.7.7.39]	27.7908	7.20041	1.94846	20.5904	0.827201		27.7908	0.0187795	10.5312	27.772	0.991846		7.20041	0.0187795	8.58278	7.18163	0.833798			KO:K06118	SQD1, sqdB; UDP-sulfoquinovose synthase [EC:3.13.1.1]	75.2599	0.74457	6.65933	74.5153	0.982918		75.2599	0.0187795	11.9685	75.2411	0.999833		0.74457	0.0187795	5.30918	0.72579	0.308921
KO:K00981	E2.7.7.41, CDS1, CDS2, cdsA; phosphatidate cytidylyltransferase [EC:2.7.7.41]	253.409	237.939	0.0908735	15.4696	0.337164		253.409	116.739	1.11818	136.67	0.837121		237.939	116.739	1.0273	121.2	0.839777			KO:K06133	LYS5, acpT; 4'-phosphopantetheinyl transferase [EC:2.7.8.-]	67.0006	6.50796	3.3639	60.4927	0.865621		67.0006	0.0187795	11.8008	66.9818	0.99976		6.50796	0.0187795	8.4369	6.48918	0.803623
KO:K00982	glnE; [glutamine synthetase] adenylyltransferase / [glutamine synthetase]-adenylyl-L-tyrosine phosphorylase [EC:2.7.7.42 2.7.7.89]	101.139	120.531	-0.253059	19.3916	0.457431		101.139	182.438	-0.851058	81.2982	0.781581		120.531	182.438	-0.597999	61.9066	0.730621			KO:K06142	hlpA, ompH; outer membrane protein	81.4251	104.229	-0.356207	22.8036	0.535693		81.4251	5.20129	3.96853	76.2238	0.897867		104.229	5.20129	4.32474	99.0273	0.90272
KO:K00983	neuA; N-acylneuraminate cytidylyltransferase [EC:2.7.7.43]	14.3937	3.16413	2.18555	11.2295	0.78358		14.3937	0.0187795	9.58206	14.3749	0.950951		3.16413	0.0187795	7.39651	3.14535	0.663283			KO:K06149	uspA; universal stress protein A	17.4614	22.5307	-0.367725	5.06934	0.463937		17.4614	0.0187795	9.8608	17.4426	0.968085		22.5307	0.0187795	10.2285	22.5119	0.981489
KO:K00984	aadA; streptomycin 3"-adenylyltransferase [EC:2.7.7.47]	23.278	0.0284763	9.67499	23.2495	0.988498		23.278	0.0187795	10.2756	23.2592	0.986159		NA	NA	NA	NA	NA			KO:K06158	ABCF3; ATP-binding cassette, subfamily F, member 3	101.154	16.7212	2.5968	84.4326	0.863635		101.154	0.0187795	12.3951	101.135	0.999948		16.7212	0.0187795	9.79831	16.7025	0.958511
KO:K00986	E2.7.7.49; RNA-directed DNA polymerase [EC:2.7.7.49]	66.4534	1.52211	5.44819	64.9313	0.955629		66.4534	0.466606	7.15399	65.9868	0.98641		1.52211	0.466606	1.7058	1.05551	0.418746			KO:K06160	pvdE; putative pyoverdin transport system ATP-binding/permease protein	13.5173	0.0284763	8.89083	13.4889	0.94663		13.5173	0.0187795	9.49144	13.4985	0.942578		NA	NA	NA	NA	NA
KO:K00988	APA1_2; ATP adenylyltransferase [EC:2.7.7.53]	0.947636	0.0284763	5.0565	0.91916	0.2862		0.947636	0.0187795	5.6571	0.928857	0.348547		NA	NA	NA	NA	NA			KO:K06166	phnG; alpha-D-ribose 1-methylphosphonate 5-triphosphate synthase subunit PhnG [EC:2.7.8.37]	39.2289	4.58905	3.09565	34.6398	0.862748		39.2289	0.0187795	11.0285	39.2101	0.99792		4.58905	0.0187795	7.9329	4.57027	0.721208
KO:K00989	rph; ribonuclease PH [EC:2.7.7.56]	143.946	171.219	-0.25032	27.2735	0.458385		143.946	99.0026	0.539989	44.9433	0.695327		171.219	99.0026	0.790308	72.2168	0.773998			KO:K06169	miaE; tRNA-(ms[2]io[6]A)-hydroxylase [EC:1.-.-.-]	34.7633	0.0284763	10.2536	34.7348	0.997302		34.7633	0.0187795	10.8542	34.7445	0.996477		NA	NA	NA	NA	NA
KO:K00990	glnD; [protein-PII] uridylyltransferase [EC:2.7.7.59]	97.6737	69.5793	0.489313	28.0945	0.605025		97.6737	58.9044	0.729596	38.7694	0.75184		69.5793	58.9044	0.240283	10.6749	0.498558			KO:K06179	rluC; 23S rRNA pseudouridine955/2504/2580 synthase [EC:5.4.99.24]	32.5882	37.4158	-0.199297	4.82758	0.389511		32.5882	0.146272	7.79956	32.442	0.992933		37.4158	0.146272	7.99885	37.2695	0.994853
KO:K00991	ispD; 2-C-methyl-D-erythritol 4-phosphate cytidylyltransferase [EC:2.7.7.60]	127.075	195.901	-0.624447	68.8264	0.668748		127.075	166.459	-0.389482	39.3835	0.627389		195.901	166.459	0.234965	29.4429	0.508945			KO:K06181	rluE; 23S rRNA pseudouridine2457 synthase [EC:5.4.99.20]	61.5669	21.2906	1.53194	40.2762	0.81643		61.5669	0.0187795	11.6788	61.5481	0.999665		21.2906	0.0187795	10.1468	21.2719	0.978781
KO:K00992	murU; N-acetyl-alpha-D-muramate 1-phosphate uridylyltransferase [EC:2.7.7.99]	4.78445	2.45367	0.96341	2.33078	0.442598		4.78445	0.0187795	7.99305	4.76567	0.749843		2.45367	0.0187795	7.02964	2.43489	0.588898			KO:K06183	rsuA; 16S rRNA pseudouridine516 synthase [EC:5.4.99.19]	52.6557	49.7287	0.0825105	2.92698	0.319916		52.6557	0.0187795	11.4532	52.6369	0.999446		49.7287	0.0187795	11.3707	49.7099	0.999086
KO:K00995	pgsA, PGS1; CDP-diacylglycerol---glycerol-3-phosphate 3-phosphatidyltransferase [EC:2.7.8.5]	257.009	264.728	-0.0426921	7.71902	0.300779		257.009	57.7532	2.15385	199.256	0.88848		264.728	57.7532	2.19654	206.975	0.894936			KO:K06189	corC; magnesium and cobalt transporter	7.31824	11.5877	-0.663026	4.26946	0.509944		7.31824	0.0187795	8.6062	7.29946	0.852666		11.5877	0.0187795	9.26922	11.5689	0.912298
KO:K00996	rfbP; undecaprenyl-phosphate galactose phosphotransferase [EC:2.7.8.6]	33.4528	28.2425	0.24426	5.21031	0.417394		33.4528	39.6439	-0.244972	6.1911	0.493602		28.2425	39.6439	-0.489232	11.4014	0.623341			KO:K06195	apaG; ApaG protein	11.8371	2.82369	2.06766	9.01337	0.756038		11.8371	0.0187795	9.29994	11.8183	0.921984		2.82369	0.0187795	7.23228	2.80491	0.588898
KO:K00997	acpS; holo-[acyl-carrier protein] synthase [EC:2.7.8.7]	120.732	220.085	-0.866246	99.3523	0.72722		120.732	121.066	-0.00397712	0.333286	0.348547		220.085	121.066	0.862269	99.0191	0.786589			KO:K06199	crcB, FEX; fluoride exporter	164.037	57.5283	1.51168	106.509	0.817657		164.037	7.71739	4.40977	156.32	0.898035		57.5283	7.71739	2.89809	49.8109	0.900774
KO:K01000	mraY; phospho-N-acetylmuramoyl-pentapeptide-transferase [EC:2.7.8.13]	249.377	284.754	-0.19139	35.3774	0.417676		249.377	118.56	1.07271	130.817	0.834706		284.754	118.56	1.2641	166.194	0.852954			KO:K06203	cysZ; CysZ protein	35.4563	0.0284763	10.2821	35.4279	0.997653		35.4563	0.0187795	10.8827	35.4376	0.996843		NA	NA	NA	NA	NA
KO:K01001	ALG7; UDP-N-acetylglucosamine--dolichyl-phosphate N-acetylglucosaminephosphotransferase [EC:2.7.8.15]	19.1869	68.9465	-1.84535	49.7595	0.84364		19.1869	296.627	-3.95046	277.44	0.898035		68.9465	296.627	-2.1051	227.681	0.894162			KO:K06204	dksA; DnaK suppressor protein	88.258	120.855	-0.453476	32.5968	0.587446		88.258	18.0161	2.29244	70.242	0.888815		120.855	18.0161	2.74592	102.839	0.900762
KO:K01002	mdoB; phosphoglycerol transferase [EC:2.7.8.20]	2.75132	0.215104	3.67701	2.53621	0.496611		2.75132	0.0187795	7.19482	2.73254	0.624409		0.215104	0.0187795	3.51781	0.196325	0.308921			KO:K06207	typA, bipA; GTP-binding protein	123.976	7.56064	4.03541	116.415	0.865914		123.976	0.0187795	12.6886	123.957	1		7.56064	0.0187795	8.65321	7.54186	0.833798
KO:K01004	pcs; phosphatidylcholine synthase [EC:2.7.8.24]	0.871856	0.0284763	4.93626	0.84338	0.2862		0.871856	0.0187795	5.53686	0.853077	0.348547		NA	NA	NA	NA	NA			KO:K06208	aroH; chorismate mutase [EC:5.4.99.5]	78.3585	38.8952	1.0105	39.4633	0.786278		78.3585	0.19243	8.66962	78.1661	0.999634		38.8952	0.19243	7.65912	38.7028	0.991887
KO:K01006	ppdK; pyruvate, orthophosphate dikinase [EC:2.7.9.1]	305.794	294.82	0.0527256	10.974	0.307489		305.794	696.837	-1.18826	391.044	0.841334		294.82	696.837	-1.24099	402.018	0.851805			KO:K06223	dam; DNA adenine methylase [EC:2.1.1.72]	349.52	94.9266	1.88049	254.593	0.844721		349.52	9.15917	5.25401	340.361	0.898035		94.9266	9.15917	3.37352	85.7674	0.902497
KO:K01007	pps, ppsA; pyruvate, water dikinase [EC:2.7.9.2]	205.013	289.002	-0.495369	83.9897	0.61045		205.013	493.407	-1.26707	288.395	0.846174		289.002	493.407	-0.771698	204.405	0.771102			KO:K06269	PPP1C; serine/threonine-protein phosphatase PP1 catalytic subunit [EC:3.1.3.16]	9.54386	26.9107	-1.49553	17.3668	0.789219		9.54386	0.0187795	8.98927	9.52508	0.893038		26.9107	0.0187795	10.4848	26.8919	0.989086
KO:K01008	selD, SEPHS; selenide, water dikinase [EC:2.7.9.3]	110.277	129.895	-0.236206	19.6174	0.452201		110.277	77.6814	0.505496	32.5961	0.68617		129.895	77.6814	0.741703	52.2134	0.767327			KO:K06284	abrB; transcriptional pleiotropic regulator of transition state genes	0.1122	12.7527	-6.82859	12.6405	0.930376		0.1122	0.0187795	2.57884	0.0934203	0.348547		12.7527	0.0187795	9.40743	12.734	0.924912
KO:K01011	TST, MPST, sseA; thiosulfate/3-mercaptopyruvate sulfurtransferase [EC:2.8.1.1 2.8.1.2]	367.657	339.197	0.116239	28.4604	0.359447		367.657	544.07	-0.565431	176.413	0.70162		339.197	544.07	-0.681669	204.873	0.750106			KO:K06306	yaaH; spore germination protein	7.65776	19.1491	-1.32228	11.4914	0.741732		7.65776	0.0187795	8.67162	7.63898	0.852666		19.1491	0.0187795	9.99391	19.1303	0.972438
KO:K01012	bioB; biotin synthase [EC:2.8.1.6]	137.173	148.917	-0.118511	11.7439	0.358853		137.173	88.6649	0.629562	48.5081	0.735083		148.917	88.6649	0.748073	60.252	0.768429			KO:K06350	kipA; antagonist of KipI	43.0166	2.1254	4.33909	40.8912	0.864599		43.0166	0.0187795	11.1615	42.9978	0.998766		2.1254	0.0187795	6.82243	2.10662	0.588898
KO:K01014	SULT1A; aryl sulfotransferase [EC:2.8.2.1]	0.772315	0.0284763	4.76136	0.743839	0.2862		0.772315	0.0187795	5.36196	0.753536	0.348547		NA	NA	NA	NA	NA			KO:K06351	kipI; inhibitor of KinA	44.6176	0.95954	5.53913	43.6581	0.954743		44.6176	0.0187795	11.2142	44.5988	0.998902		0.95954	0.0187795	5.67511	0.940761	0.308921
KO:K01015	SULT2B1; alcohol sulfotransferase [EC:2.8.2.2]	1.85468	0.0284763	6.02526	1.8262	0.494595		1.85468	0.0187795	6.62587	1.8359	0.524096		NA	NA	NA	NA	NA			KO:K06373	spmA; spore maturation protein A	2.77815	12.2693	-2.14286	9.49115	0.756038		2.77815	0.0187795	7.20882	2.75937	0.624409		12.2693	0.0187795	9.35168	12.2505	0.924912
KO:K01016	SULT1E1, STE; estrone sulfotransferase [EC:2.8.2.4]	0.987993	0.0284763	5.11667	0.959517	0.2862		0.987993	0.0187795	5.71727	0.969213	0.348547		NA	NA	NA	NA	NA			KO:K06374	spmB; spore maturation protein B	4.502	23.3842	-2.3769	18.8822	0.83583		4.502	0.166081	4.76061	4.33592	0.650408		23.3842	0.166081	7.13751	23.2181	0.971372
KO:K01025	SULT1; sulfotransferase [EC:2.8.2.-]	1.05593	0.0284763	5.21261	1.02745	0.494595		1.05593	0.0187795	5.81321	1.03715	0.524096		NA	NA	NA	NA	NA			KO:K06378	spoIIAA; stage II sporulation protein AA (anti-sigma F factor antagonist)	16.7789	4.74347	1.82263	12.0354	0.78209		16.7789	0.0187795	9.80328	16.7601	0.963255		4.74347	0.0187795	7.98064	4.72469	0.721208
KO:K01026	pct; propionate CoA-transferase [EC:2.8.3.1]	3.85189	1.11427	1.78946	2.73762	0.496611		3.85189	76.3302	-4.30862	72.4784	0.897826		1.11427	76.3302	-6.09808	75.216	0.96619			KO:K06400	spoIVCA; site-specific DNA recombinase	36.3667	30.9721	0.23165	5.39463	0.414063		36.3667	0.0187795	10.9192	36.3479	0.997198		30.9721	0.0187795	10.6876	30.9533	0.993142
KO:K01027	OXCT; 3-oxoacid CoA-transferase [EC:2.8.3.5]	0.179864	0.0284763	2.65907	0.151388	0.2862		0.179864	0.0187795	3.25968	0.161085	0.348547		NA	NA	NA	NA	NA			KO:K06416	spoVS; stage V sporulation protein S	87.9599	108.983	-0.309187	21.0232	0.498724		87.9599	11.1563	2.97899	76.8036	0.897063		108.983	11.1563	3.28817	97.8269	0.902368
KO:K01028	E2.8.3.5A, scoA; 3-oxoacid CoA-transferase subunit A [EC:2.8.3.5]	30.85	36.9023	-0.258439	6.05227	0.441235		30.85	0.0187795	10.6819	30.8312	0.994428		36.9023	0.0187795	10.9403	36.8835	0.996753			KO:K06443	lcyB, crtL1, crtY; lycopene beta-cyclase [EC:5.5.1.19]	47.4371	0.0284763	10.702	47.4087	0.999309		47.4371	0.0187795	11.3026	47.4184	0.999195		NA	NA	NA	NA	NA
KO:K01029	E2.8.3.5B, scoB; 3-oxoacid CoA-transferase subunit B [EC:2.8.3.5]	2.1681	8.89312	-2.03626	6.72502	0.688381		2.1681	0.227039	3.25542	1.94106	0.454317		8.89312	0.227039	5.29168	8.66608	0.761172			KO:K06518	cidA; holin-like protein	30.2853	0.0284763	10.0546	30.2568	0.995686		30.2853	0.0187795	10.6552	30.2665	0.994428		NA	NA	NA	NA	NA
KO:K01031	pcaI; 3-oxoadipate CoA-transferase, alpha subunit [EC:2.8.3.6]	1.0274	5.07296	-2.30383	4.04556	0.614794		1.0274	0.0187795	5.7737	1.00862	0.524096		5.07296	0.0187795	8.07753	5.05418	0.766729			KO:K06595	hemAT; heam-based aerotactic trancducer	17.043	0.0284763	9.2252	17.0145	0.971445		17.043	0.0187795	9.82581	17.0242	0.968085		NA	NA	NA	NA	NA
KO:K01032	pcaJ; 3-oxoadipate CoA-transferase, beta subunit [EC:2.8.3.6]	0.0284763	0.271648	-3.2539	0.243171	0.2862		NA	NA	NA	NA	NA		0.271648	0.0187795	3.85451	0.252868	0.308921			KO:K06596	chpA; chemosensory pili system protein ChpA (sensor histidine kinase/response regulator)	78.0203	6.08814	3.67978	71.9322	0.865855		78.0203	0.0187795	12.0205	78.0015	0.999843		6.08814	0.0187795	8.3407	6.06936	0.803623
KO:K01034	atoD; acetate CoA/acetoacetate CoA-transferase alpha subunit [EC:2.8.3.8 2.8.3.9]	1.04795	1.25295	-0.257755	0.204997	0.2862		1.04795	0.0187795	5.80227	1.02917	0.524096		1.25295	0.0187795	6.06003	1.23417	0.482345			KO:K06603	flaG; flagellar protein FlaG	17.4773	51.5081	-1.55932	34.0309	0.815066		17.4773	5.87728	1.57226	11.6	0.781507		51.5081	5.87728	3.13158	45.6308	0.900844
KO:K01035	atoA; acetate CoA/acetoacetate CoA-transferase beta subunit [EC:2.8.3.8 2.8.3.9]	1.60675	0.561783	1.51606	1.04496	0.404723		1.60675	0.0187795	6.41884	1.58797	0.524096		0.561783	0.0187795	4.90278	0.543004	0.308921			KO:K06694	PSMD10; 26S proteasome non-ATPase regulatory subunit 10	27.822	0.0284763	9.93225	27.7935	0.993592		27.822	0.0187795	10.5329	27.8032	0.991846		NA	NA	NA	NA	NA
KO:K01039	gctA; glutaconate CoA-transferase, subunit A [EC:2.8.3.12]	53.0574	84.5977	-0.673064	31.5403	0.676802		53.0574	165.18	-1.63841	112.123	0.875476		84.5977	165.18	-0.965349	80.5823	0.795006			KO:K06860	K06860; putative heme uptake system protein	74.8679	2.40406	4.9608	72.4638	0.865865		74.8679	0.0187795	11.961	74.8491	0.999822		2.40406	0.0187795	7.00017	2.38528	0.588898
KO:K01040	gctB; glutaconate CoA-transferase, subunit B [EC:2.8.3.12]	50.4653	110.395	-1.12931	59.9293	0.791771		50.4653	318.469	-2.65779	268.004	0.895934		110.395	318.469	-1.52848	208.075	0.865733			KO:K06867	K06867; uncharacterized protein	22.2526	36.6297	-0.71904	14.3771	0.655775		22.2526	0.0187795	10.2106	22.2338	0.98411		36.6297	0.0187795	10.9296	36.6109	0.996753
KO:K01042	selA; L-seryl-tRNA(Ser) seleniumtransferase [EC:2.9.1.1]	85.2458	184.103	-1.11082	98.8577	0.790543		85.2458	134.692	-0.659963	49.4462	0.74217		184.103	134.692	0.450853	49.4115	0.658089			KO:K06870	K06870; uncharacterized protein	0.367793	12.4192	-5.07753	12.0514	0.803253		0.367793	122.695	-8.38197	122.328	0.99954		12.4192	122.695	-3.30444	110.276	0.902403
KO:K01045	PON; arylesterase / paraoxonase [EC:3.1.1.2 3.1.8.1]	0.392793	0.0284763	3.78593	0.364316	0.2862		0.392793	0.0187795	4.38654	0.374013	0.348547		NA	NA	NA	NA	NA			KO:K06872	K06872; uncharacterized protein	104.493	51.8248	1.01169	52.668	0.787271		104.493	0.196073	9.0578	104.297	0.999906		51.8248	0.196073	8.04611	51.6288	0.996858
KO:K01046	lip, TGL2; triacylglycerol lipase [EC:3.1.1.3]	8.93296	18.7863	-1.07247	9.85335	0.697273		8.93296	0.0187795	8.89384	8.91418	0.87488		18.7863	0.0187795	9.96631	18.7675	0.968382			KO:K06873	K06873; uncharacterized protein	98.4485	67.6197	0.541924	30.8287	0.622517		98.4485	0.240587	8.67666	98.2079	0.999739		67.6197	0.240587	8.13474	67.3792	0.998734
KO:K01048	pldB; lysophospholipase [EC:3.1.1.5]	7.9717	1.47137	2.43773	6.50033	0.692365		7.9717	0.0187795	8.72959	7.95292	0.852666		1.47137	0.0187795	6.29186	1.45259	0.482345			KO:K06874	K06874; zinc finger protein	0.3717	3.56751	-3.26271	3.19581	0.56643		0.3717	65.1278	-7.45299	64.7561	0.993937		3.56751	65.1278	-4.19028	61.5603	0.902309
KO:K01051	E3.1.1.11; pectinesterase [EC:3.1.1.11]	3.11039	4.09654	-0.397311	0.986152	0.2862		3.11039	42.9243	-3.78663	39.8139	0.895954		4.09654	42.9243	-3.38932	38.8277	0.900035			KO:K06876	K06876; deoxyribodipyrimidine photolyase-related protein	184.522	4.90021	5.23481	179.622	0.955785		184.522	0.0187795	13.2624	184.504	1		4.90021	0.0187795	8.02754	4.88143	0.721208
KO:K01053	E3.1.1.17, gnl, RGN; gluconolactonase [EC:3.1.1.17]	48.9478	17.655	1.47117	31.2928	0.81307		48.9478	0.515856	6.56813	48.4319	0.96706		17.655	0.515856	5.09696	17.1391	0.866436			KO:K06890	K06890; uncharacterized protein	8.81705	20.448	-1.21359	11.631	0.728068		8.81705	0.0187795	8.87499	8.79827	0.87488		20.448	0.0187795	10.0886	20.4293	0.975733
KO:K01055	pcaD; 3-oxoadipate enol-lactonase [EC:3.1.1.24]	80.8632	83.1038	-0.0394308	2.24058	0.299844		80.8632	31.2237	1.37284	49.6395	0.853481		83.1038	31.2237	1.41227	51.88	0.860926			KO:K06891	clpS; ATP-dependent Clp protease adaptor protein ClpS	166.695	22.538	2.88678	144.157	0.864823		166.695	0.0187795	13.1158	166.676	1		22.538	0.0187795	10.229	22.5192	0.981489
KO:K01056	PTH1, pth, spoVC; peptidyl-tRNA hydrolase, PTH1 family [EC:3.1.1.29]	267.517	287.223	-0.102544	19.7066	0.344176		267.517	138.717	0.947488	128.8	0.789964		287.223	138.717	1.05003	148.507	0.840258			KO:K06893	K06893; uncharacterized protein	11.7441	4.37825	1.42351	7.36582	0.680483		11.7441	0.0187795	9.28856	11.7253	0.921984		4.37825	0.0187795	7.86505	4.35947	0.721208
KO:K01057	PGLS, pgl, devB; 6-phosphogluconolactonase [EC:3.1.1.31]	134.711	58.9868	1.1914	75.7242	0.796961		134.711	21.8723	2.62269	112.839	0.895923		58.9868	21.8723	1.43129	37.1146	0.861489			KO:K06897	K06897; 7,8-dihydropterin-6-yl-methyl-4-(beta-D-ribofuranosyl)aminobenzene 5'-phosphate synthase [EC:2.5.1.105]	56.1169	71.0813	-0.341035	14.9644	0.515271		56.1169	2.79293	4.32858	53.3239	0.897512		71.0813	2.79293	4.66962	68.2884	0.902438
KO:K01060	cah; cephalosporin-C deacetylase [EC:3.1.1.41]	102.72	35.4467	1.535	67.2736	0.817628		102.72	0.0187795	12.4173	102.702	0.999948		35.4467	0.0187795	10.8823	35.4279	0.996272			KO:K06903	K06903; uncharacterized protein	25.5356	3.11427	3.03555	22.4214	0.852201		25.5356	0.0187795	10.4091	25.5168	0.989233		3.11427	0.0187795	7.37359	3.09549	0.663283
KO:K01061	E3.1.1.45; carboxymethylenebutenolidase [EC:3.1.1.45]	120.037	93.8053	0.355743	26.2321	0.536882		120.037	23.7458	2.33774	96.2916	0.893529		93.8053	23.7458	1.982	70.0595	0.886026			KO:K06907	K06907; uncharacterized protein	27.9299	8.56362	1.70552	19.3663	0.820179		27.9299	0.0187795	10.5384	27.9111	0.991846		8.56362	0.0187795	8.83292	8.54484	0.858335
KO:K01066	aes; acetyl esterase [EC:3.1.1.-]	3.32836	22.8568	-2.77974	19.5284	0.842929		3.32836	0.167315	4.31417	3.16104	0.59977		22.8568	0.167315	7.09391	22.6894	0.969097			KO:K06909	xtmB; phage terminase large subunit	13.4032	1.8017	2.89515	11.6015	0.792199		13.4032	0.0187795	9.47921	13.3845	0.942578		1.8017	0.0187795	6.58406	1.78292	0.482345
KO:K01067	E3.1.2.1, ACH1; acetyl-CoA hydrolase [EC:3.1.2.1]	54.8487	30.0839	0.866467	24.7648	0.718485		54.8487	71.6834	-0.386183	16.8347	0.612607		30.0839	71.6834	-1.25265	41.5996	0.850188			KO:K06914	mfnD; tyramine---L-glutamate ligase [EC:6.3.4.24]	0.596736	12.8374	-4.42712	12.2407	0.803253		0.596736	0.0187795	4.98986	0.577957	0.348547		12.8374	0.0187795	9.41698	12.8186	0.924912
KO:K01069	gloB, HAGH; hydroxyacylglutathione hydrolase [EC:3.1.2.6]	216.2	44.8801	2.26822	171.32	0.855989		216.2	144.527	0.581027	71.6729	0.729668		44.8801	144.527	-1.68719	99.6467	0.882157			KO:K06916	zapE; cell division protein ZapE	15.1658	5.37304	1.49701	9.79277	0.720637		15.1658	0.0187795	9.65745	15.147	0.957359		5.37304	0.0187795	8.16044	5.35426	0.766729
KO:K01070	frmB, ESD, fghA; S-formylglutathione hydrolase [EC:3.1.2.12]	1.11418	0.62909	0.824649	0.485094	0.2862		1.11418	0.0187795	5.89069	1.0954	0.524096		0.62909	0.0187795	5.06604	0.610311	0.308921			KO:K06917	selU; tRNA 2-selenouridine synthase [EC:2.9.1.-]	34.6338	0.162851	7.73248	34.4709	0.996601		34.6338	0.0187795	10.8488	34.615	0.996477		0.162851	0.0187795	3.11632	0.144071	0.308921
KO:K01071	MCH; medium-chain acyl-[acyl-carrier-protein] hydrolase [EC:3.1.2.21]	11.3747	1.97559	2.52548	9.39915	0.761346		11.3747	0.0187795	9.24246	11.356	0.921984		1.97559	0.0187795	6.71698	1.95681	0.482345			KO:K06930	K06930; uncharacterized protein	18.4284	32.2896	-0.809138	13.8612	0.672926		18.4284	282.627	-3.9389	264.199	0.898035		32.2896	282.627	-3.12976	250.338	0.902169
KO:K01073	E3.1.2.20; acyl-CoA hydrolase [EC:3.1.2.20]	9.79314	3.71677	1.39772	6.07637	0.653409		9.79314	0.18951	5.69143	9.60364	0.791146		3.71677	0.18951	4.29371	3.52726	0.571606			KO:K06935	K06935; uncharacterized protein	0.536627	7.06408	-3.71851	6.52745	0.696046		0.536627	121.988	-7.8286	121.451	0.99747		7.06408	121.988	-4.11009	114.924	0.902743
KO:K01075	E3.1.2.23; 4-hydroxybenzoyl-CoA thioesterase [EC:3.1.2.23]	5.32283	4.8141	0.144927	0.50873	0.2862		5.32283	0.0187795	8.14689	5.30405	0.792714		4.8141	0.0187795	8.00196	4.79532	0.721208			KO:K06943	NOG1; nucleolar GTP-binding protein	0.467703	5.9689	-3.6738	5.50119	0.661765		0.467703	56.8049	-6.92428	56.3372	0.986222		5.9689	56.8049	-3.25048	50.836	0.901583
KO:K01077	E3.1.3.1, phoA, phoB; alkaline phosphatase [EC:3.1.3.1]	166.979	51.2944	1.70279	115.684	0.840914		166.979	0.143115	10.1883	166.836	1		51.2944	0.143115	8.48549	51.1513	0.998851			KO:K06948	yqeH; 30S ribosome assembly GTPase	2.02248	6.02517	-1.57488	4.0027	0.586424		2.02248	83.666	-5.37045	81.6435	0.897878		6.02517	83.666	-3.79557	77.6408	0.902556
KO:K01078	PHO; acid phosphatase [EC:3.1.3.2]	2.37507	22.0089	-3.21204	19.6338	0.844838		2.37507	0.0187795	6.98267	2.35629	0.624409		22.0089	0.0187795	10.1947	21.9901	0.978781			KO:K06951	K06951; uncharacterized protein	13.9501	61.2946	-2.13549	47.3445	0.854519		13.9501	1.20375	3.53466	12.7463	0.831183		61.2946	1.20375	5.67015	60.0908	0.902274
KO:K01079	serB, PSPH; phosphoserine phosphatase [EC:3.1.3.3]	44.9557	99.9257	-1.15235	54.97	0.793621		44.9557	133.199	-1.56701	88.2432	0.858185		99.9257	133.199	-0.414655	33.2733	0.623095			KO:K06955	K06955; uncharacterized protein	54.3445	0.421715	7.00972	53.9228	0.992686		54.3445	0.0187795	11.4988	54.3257	0.999519		0.421715	0.0187795	4.48904	0.402936	0.308921
KO:K01081	E3.1.3.5; 5'-nucleotidase [EC:3.1.3.5]	135.409	145.012	-0.098853	9.60344	0.343621		135.409	24.0912	2.49074	111.318	0.89377		145.012	24.0912	2.5896	120.921	0.900668			KO:K06963	TAN1, THUMPD1; tRNA acetyltransferase TAN1	7.173	78.6574	-3.45493	71.4844	0.865767		7.173	576.843	-6.32946	569.67	0.967813		78.6574	576.843	-2.87452	498.185	0.901688
KO:K01082	cysQ, MET22, BPNT1; 3'(2'), 5'-bisphosphate nucleotidase [EC:3.1.3.7]	50.252	6.36478	2.981	43.8873	0.86381		50.252	0.0187795	11.3858	50.2333	0.999373		6.36478	0.0187795	8.40481	6.346	0.803623			KO:K06965	PELO, DOM34, pelA; protein pelota	13.7301	60.4415	-2.1382	46.7115	0.85446		13.7301	445.262	-5.01924	431.532	0.898035		60.4415	445.262	-2.88104	384.821	0.901688
KO:K01083	E3.1.3.8; 3-phytase [EC:3.1.3.8]	47.6574	20.0813	1.24684	27.5761	0.795247		47.6574	0.0187795	11.3093	47.6386	0.999195		20.0813	0.0187795	10.0625	20.0626	0.975733			KO:K06968	rlmM; 23S rRNA (cytidine2498-2'-O)-methyltransferase [EC:2.1.1.186]	25.835	2.08575	3.63069	23.7493	0.854402		25.835	0.0187795	10.426	25.8162	0.989233		2.08575	0.0187795	6.79526	2.06697	0.588898
KO:K01087	otsB; trehalose 6-phosphate phosphatase [EC:3.1.3.12]	34.4112	19.0889	0.850144	15.3223	0.689823		34.4112	14.6633	1.23067	19.7479	0.821597		19.0889	14.6633	0.380526	4.42563	0.483634			KO:K06972	PITRM1, PreP, CYM1; presequence protease [EC:3.4.24.-]	47.9711	0.162696	8.20384	47.8084	0.999172		47.9711	0.0187795	11.3188	47.9523	0.999195		0.162696	0.0187795	3.11495	0.143916	0.308921
KO:K01089	hisB; imidazoleglycerol-phosphate dehydratase / histidinol-phosphatase [EC:4.2.1.19 3.1.3.15]	5.72819	0.0828623	6.11122	5.64533	0.751636		5.72819	0.0187795	8.25278	5.70941	0.792714		0.0828623	0.0187795	2.14156	0.0640828	0.308921			KO:K06973	K06973; uncharacterized protein	102.441	91.6222	0.161021	10.8185	0.388946		102.441	12.0263	3.09052	90.4144	0.897502		91.6222	12.0263	2.9295	79.5959	0.901547
KO:K01090	E3.1.3.16; protein phosphatase [EC:3.1.3.16]	482.145	252.431	0.933575	229.713	0.732577		482.145	536.476	-0.154049	54.3318	0.46268		252.431	536.476	-1.08762	284.045	0.841934			KO:K06975	K06975; uncharacterized protein	1.55219	1.27284	0.286257	0.279352	0.2862		1.55219	111.473	-6.16625	109.921	0.967792		1.27284	111.473	-6.45251	110.201	0.966342
KO:K01091	gph; phosphoglycolate phosphatase [EC:3.1.3.18]	99.2013	153.186	-0.626856	53.985	0.670676		99.2013	100.321	-0.0161869	1.1193	0.354129		153.186	100.321	0.610669	52.8657	0.731958			KO:K06980	ygfZ; tRNA-modifying protein YgfZ	114.262	48.9681	1.22244	65.2942	0.80113		114.262	4.88948	4.54653	109.373	0.898014		48.9681	4.88948	3.32409	44.0786	0.901161
KO:K01092	E3.1.3.25, IMPA, suhB; myo-inositol-1(or 4)-monophosphatase [EC:3.1.3.25]	309.841	279.862	0.146811	29.9788	0.384856		309.841	261.554	0.244417	48.2866	0.533535		279.862	261.554	0.0976059	18.3078	0.386776			KO:K06983	K06983; uncharacterized protein	29.7551	44.8231	-0.591103	15.0679	0.639521		29.7551	367.728	-3.62743	337.973	0.898024		44.8231	367.728	-3.03633	322.905	0.902169
KO:K01095	pgpA; phosphatidylglycerophosphatase A [EC:3.1.3.27]	33.4173	55.772	-0.738945	22.3547	0.693923		33.4173	44.6238	-0.417218	11.2065	0.612544		55.772	44.6238	0.321728	11.1482	0.555158			KO:K06984	K06984; beta-ribofuranosylaminobenzene 5'-phosphate synthase [EC:2.4.2.54]	10.3429	46.2286	-2.16015	35.8858	0.852863		10.3429	347.416	-5.06995	337.073	0.898035		46.2286	347.416	-2.90981	301.188	0.9017
KO:K01096	pgpB; phosphatidylglycerophosphatase B [EC:3.1.3.27 3.1.3.81 3.1.3.4 3.6.1.27]	0.602204	0.0284763	4.40242	0.573728	0.2862		0.602204	0.0187795	5.00302	0.583425	0.348547		NA	NA	NA	NA	NA			KO:K06987	K06987; uncharacterized protein	17.757	2.44994	2.85757	15.3071	0.825623		17.757	0.0187795	9.88502	17.7382	0.968085		2.44994	0.0187795	7.02744	2.43116	0.588898
KO:K01101	E3.1.3.41; 4-nitrophenyl phosphatase [EC:3.1.3.41]	120.224	162.345	-0.433341	42.1214	0.581097		120.224	343.943	-1.51645	223.719	0.858238		162.345	343.943	-1.0831	181.598	0.84136			KO:K06989	nadX; aspartate dehydrogenase [EC:1.4.1.21]	8.05491	51.3877	-2.67348	43.3327	0.862631		8.05491	2.575	1.64529	5.4799	0.67627		51.3877	2.575	4.31877	48.8126	0.901747
KO:K01104	E3.1.3.48; protein-tyrosine phosphatase [EC:3.1.3.48]	155.82	134.723	0.209884	21.097	0.428935		155.82	175.131	-0.168558	19.3114	0.477357		134.723	175.131	-0.378442	40.4084	0.61422			KO:K06991	K06991; uncharacterized protein	46.6688	0.0284763	10.6785	46.6404	0.99925		46.6688	0.0187795	11.2791	46.6501	0.999091		NA	NA	NA	NA	NA
KO:K01113	phoD; alkaline phosphatase D [EC:3.1.3.1]	166.838	45.0772	1.88798	121.761	0.844721		166.838	16.4036	3.34636	150.435	0.897962		45.0772	16.4036	1.45839	28.6736	0.856413			KO:K06992	K06992; uncharacterized protein	4.6651	25.0241	-2.42334	20.359	0.842754		4.6651	0.100583	5.53546	4.56452	0.650408		25.0241	0.100583	7.9588	24.9235	0.983447
KO:K01114	plc; phospholipase C [EC:3.1.4.3]	1.88754	5.59048	-1.56646	3.70294	0.542257		1.88754	0.0187795	6.65121	1.86876	0.524096		5.59048	0.0187795	8.21767	5.5717	0.766729			KO:K07003	K07003; uncharacterized protein	42.8757	101.791	-1.24738	58.9155	0.801354		42.8757	0.217164	7.62523	42.6585	0.992787		101.791	0.217164	8.87261	101.574	0.999883
KO:K01118	acpD, azoR; FMN-dependent NADH-azoreductase [EC:1.7.-.-]	2.384	0.477682	2.31926	1.90632	0.404723		2.384	0.0187795	6.98808	2.36522	0.624409		0.477682	0.0187795	4.66882	0.458902	0.308921			KO:K07004	K07004; uncharacterized protein	127.086	22.2698	2.51264	104.816	0.86083		127.086	2.35724	5.75256	124.729	0.967813		22.2698	2.35724	3.23991	19.9125	0.874865
KO:K01119	cpdB; 2',3'-cyclic-nucleotide 2'-phosphodiesterase / 3'-nucleotidase [EC:3.1.4.16 3.1.3.6]	61.3477	34.0446	0.849583	27.3031	0.718533		61.3477	0.231911	8.04729	61.1158	0.997136		34.0446	0.231911	7.19771	33.8127	0.98286			KO:K07007	K07007; uncharacterized protein	32.1523	34.9983	-0.122362	2.84598	0.334564		32.1523	0.0187795	10.7415	32.1335	0.995463		34.9983	0.0187795	10.8639	34.9795	0.995826
KO:K01120	cpdP; 3',5'-cyclic-nucleotide phosphodiesterase [EC:3.1.4.17]	2.8334	0.0284763	6.63663	2.80492	0.613664		2.8334	0.0187795	7.23723	2.81462	0.624409		NA	NA	NA	NA	NA			KO:K07009	K07009; uncharacterized protein	43.2669	29.4083	0.557043	13.8587	0.597468		43.2669	0.520247	6.37792	42.7467	0.966391		29.4083	0.520247	5.82088	28.888	0.957608
KO:K01126	E3.1.4.46, glpQ, ugpQ; glycerophosphoryl diester phosphodiesterase [EC:3.1.4.46]	241.532	261.119	-0.112495	19.5873	0.351237		241.532	179.282	0.429978	62.2492	0.655227		261.119	179.282	0.542473	81.8366	0.695615			KO:K07018	K07018; uncharacterized protein	10.1487	19.6916	-0.956276	9.54282	0.645179		10.1487	0.0187795	9.07793	10.13	0.908708		19.6916	0.0187795	10.0342	19.6728	0.972438
KO:K01127	E3.1.4.50; glycosylphosphatidylinositol phospholipase D [EC:3.1.4.50]	0.0284763	0.293357	-3.36482	0.26488	0.2862		NA	NA	NA	NA	NA		0.293357	0.0187795	3.96543	0.274577	0.308921			KO:K07026	E3.1.3.70; mannosyl-3-phosphoglycerate phosphatase [EC:3.1.3.70]	45.7513	16.474	1.47362	29.2773	0.812047		45.7513	0.0187795	11.2504	45.7325	0.999049		16.474	0.0187795	9.77682	16.4552	0.958511
KO:K01129	dgt; dGTPase [EC:3.1.5.1]	168.394	159.851	0.075118	8.54357	0.328905		168.394	84.6066	0.993001	83.7877	0.790194		159.851	84.6066	0.917883	75.2441	0.792521			KO:K07034	K07034; uncharacterized protein	0.360929	17.5543	-5.60397	17.1934	0.92723		0.360929	0.0187795	4.26449	0.342149	0.348547		17.5543	0.0187795	9.86845	17.5355	0.963669
KO:K01130	E3.1.6.1, aslA; arylsulfatase [EC:3.1.6.1]	14.5736	9.49936	0.617456	5.07425	0.533765		14.5736	0.0187795	9.59999	14.5548	0.950951		9.49936	0.0187795	8.98253	9.48058	0.879086			KO:K07046	K07046; L-fuconolactonase [EC:3.1.1.-]	54.6726	6.57158	3.05651	48.101	0.864842		54.6726	0.0187795	11.5074	54.6538	0.999519		6.57158	0.0187795	8.45094	6.5528	0.803623
KO:K01132	GALNS; N-acetylgalactosamine-6-sulfatase [EC:3.1.6.4]	3.49908	3.07003	0.188722	0.429048	0.2862		3.49908	0.0187795	7.54168	3.4803	0.695944		3.07003	0.0187795	7.35295	3.05126	0.663283			KO:K07049	K07049; TatD-related deoxyribonuclease	0.627454	5.13443	-3.03262	4.50698	0.618777		0.627454	149.485	-7.89627	148.857	0.99747		5.13443	149.485	-4.86365	144.35	0.902767
KO:K01133	betC; choline-sulfatase [EC:3.1.6.6]	10.9539	34.544	-1.65699	23.5901	0.828896		10.9539	13.6073	-0.312939	2.65343	0.440121		34.544	13.6073	1.34405	20.9367	0.836624			KO:K07058	K07058; membrane protein	97.1873	57.0812	0.767752	40.1061	0.706058		97.1873	0.0187795	12.3374	97.1685	0.999948		57.0812	0.0187795	11.5696	57.0624	0.999426
KO:K01134	ARSA; arylsulfatase A [EC:3.1.6.8]	12.0603	10.0717	0.259961	1.98861	0.343377		12.0603	0.0187795	9.32689	12.0415	0.93317		10.0717	0.0187795	9.06693	10.0529	0.89687			KO:K07067	disA; diadenylate cyclase [EC:2.7.7.85]	8.91691	32.816	-1.87978	23.8991	0.833249		8.91691	0.0187795	8.89124	8.89814	0.87488		32.816	0.0187795	10.771	32.7973	0.994689
KO:K01135	ARSB; arylsulfatase B [EC:3.1.6.12]	2.70954	3.20995	-0.244502	0.500408	0.2862		2.70954	15.1947	-2.48745	12.4851	0.827033		3.20995	15.1947	-2.24294	11.9847	0.807679			KO:K07072	mfnF; (4-(4-[2-(gamma-L-glutamylamino)ethyl]phenoxymethyl)furan-2-yl)methanamine synthase [EC:2.5.1.131]	1.41423	14.9844	-3.40538	13.5702	0.812456		1.41423	0.0187795	6.23471	1.39545	0.524096		14.9844	0.0187795	9.64009	14.9656	0.944033
KO:K01136	IDS; iduronate 2-sulfatase [EC:3.1.6.13]	3.79348	7.13939	-0.912278	3.34591	0.492443		3.79348	0.0187795	7.65822	3.7747	0.695944		7.13939	0.0187795	8.5705	7.12061	0.833798			KO:K07075	K07075; uncharacterized protein	991.605	480.711	1.0446	510.894	0.787924		991.605	77.0409	3.68607	914.564	0.898024		480.711	77.0409	2.64147	403.67	0.900692
KO:K01137	GNS; N-acetylglucosamine-6-sulfatase [EC:3.1.6.14]	5.0897	3.85393	0.401253	1.23578	0.350604		5.0897	0.0187795	8.08228	5.07092	0.792714		3.85393	0.0187795	7.68103	3.83515	0.663283			KO:K07085	K07085; putative transport protein	34.6262	1.70321	4.34554	32.923	0.862495		34.6262	0.0187795	10.8485	34.6075	0.996477		1.70321	0.0187795	6.50296	1.68443	0.482345
KO:K01138	K01138; uncharacterized sulfatase [EC:3.1.6.-]	80.8511	138.961	-0.781343	58.1102	0.709953		80.8511	286.505	-1.82522	205.654	0.878946		138.961	286.505	-1.04388	147.544	0.839941			KO:K07097	K07097; uncharacterized protein	0.0284763	1.25343	-5.45997	1.22495	0.494595		0.0187795	76.4104	-11.9904	76.3916	0.999833		1.25343	76.4104	-5.92982	75.157	0.96619
KO:K01139	spoT; GTP diphosphokinase / guanosine-3',5'-bis(diphosphate) 3'-diphosphatase [EC:2.7.6.5 3.1.7.2]	34.8899	37.2143	-0.0930477	2.3244	0.324494		34.8899	5.36535	2.70107	29.5246	0.889776		37.2143	5.36535	2.79411	31.849	0.894736			KO:K07099	K07099; uncharacterized protein	49.2957	3.97591	3.63211	45.3198	0.865047		49.2957	0.0187795	11.3581	49.2769	0.999289		3.97591	0.0187795	7.72598	3.95713	0.663283
KO:K01141	sbcB, exoI; exodeoxyribonuclease I [EC:3.1.11.1]	0.0284763	0.456667	-4.00331	0.428191	0.2862		NA	NA	NA	NA	NA		0.456667	0.0187795	4.60391	0.437887	0.308921			KO:K07117	K07117; uncharacterized protein	15.5494	0.125853	6.94898	15.4236	0.953779		15.5494	0.0187795	9.69349	15.5307	0.957359		0.125853	0.0187795	2.74451	0.107074	0.308921
KO:K01142	E3.1.11.2, xthA; exodeoxyribonuclease III [EC:3.1.11.2]	64.5353	75.8226	-0.232539	11.2873	0.44217		64.5353	5.49382	3.55421	59.0415	0.897596		75.8226	5.49382	3.78675	70.3288	0.902438			KO:K07119	K07119; uncharacterized protein	4.7933	14.4516	-1.59214	9.65831	0.742618		4.7933	0.0187795	7.99572	4.77453	0.749843		14.4516	0.0187795	9.58786	14.4328	0.944033
KO:K01144	E3.1.11.5; exodeoxyribonuclease V [EC:3.1.11.5]	2.16639	0.0284763	6.24939	2.13791	0.613664		2.16639	0.0187795	6.84999	2.14761	0.624409		NA	NA	NA	NA	NA			KO:K07120	K07120; uncharacterized protein	32.02	28.8003	0.152894	3.21979	0.360119		32.02	0.0187795	10.7356	32.0013	0.995463		28.8003	0.0187795	10.5827	28.7815	0.991243
KO:K01147	rnb; exoribonuclease II [EC:3.1.13.1]	65.9803	30.3354	1.12103	35.6448	0.789501		65.9803	0.0187795	11.7787	65.9615	0.999749		30.3354	0.0187795	10.6576	30.3167	0.993142			KO:K07129	K07129; uncharacterized protein	0.810848	7.9078	-3.28577	7.09695	0.723861		0.810848	56.8335	-6.13117	56.0226	0.967374		7.9078	56.8335	-2.84539	48.9257	0.900668
KO:K01150	endA; deoxyribonuclease I [EC:3.1.21.1]	2.17571	0.0284763	6.25558	2.14724	0.613664		2.17571	0.0187795	6.85619	2.15693	0.624409		NA	NA	NA	NA	NA			KO:K07137	K07137; uncharacterized protein	15.904	67.739	-2.09059	51.8349	0.854519		15.904	4.54845	1.80594	11.3556	0.801568		67.739	4.54845	3.89654	63.1905	0.902309
KO:K01151	nfo; deoxyribonuclease IV [EC:3.1.21.2]	216.686	322.927	-0.575602	106.241	0.663868		216.686	391.842	-0.854669	175.156	0.781737		322.927	391.842	-0.279066	68.9156	0.548816			KO:K07138	K07138; uncharacterized protein	21.3114	55.7503	-1.38736	34.4389	0.810314		21.3114	0.940997	4.50129	20.3704	0.87765		55.7503	0.940997	5.88865	54.8093	0.965698
KO:K01153	hsdR; type I restriction enzyme, R subunit [EC:3.1.21.3]	347.137	374.243	-0.10847	27.1059	0.351315		347.137	122.447	1.50335	224.69	0.858102		374.243	122.447	1.61182	251.796	0.882016			KO:K07140	K07140; uncharacterized protein	33.0013	15.5666	1.08407	17.4347	0.762047		33.0013	0.0187795	10.7791	32.9825	0.995463		15.5666	0.0187795	9.69508	15.5478	0.951864
KO:K01154	hsdS; type I restriction enzyme, S subunit [EC:3.1.21.3]	329.652	295.052	0.159973	34.5997	0.390845		329.652	107.847	1.61195	221.804	0.875455		295.052	107.847	1.45198	187.205	0.86449			KO:K07143	K07143; UPF0148 protein	13.0195	42.3454	-1.70153	29.3259	0.836093		13.0195	343.052	-4.71968	330.032	0.898035		42.3454	343.052	-3.01815	300.706	0.902169
KO:K01155	E3.1.21.4; type II restriction enzyme [EC:3.1.21.4]	86.8408	52.988	0.712708	33.8528	0.688002		86.8408	69.4344	0.322722	17.4064	0.585762		52.988	69.4344	-0.389986	16.4464	0.602649			KO:K07144	mfnE; 5-(aminomethyl)-3-furanmethanol phosphate kinase [EC:2.7.4.31]	0.279655	11.4377	-5.35401	11.1581	0.883074		0.279655	0.0187795	3.89642	0.260876	0.348547		11.4377	0.0187795	9.25043	11.4189	0.912298
KO:K01156	res; type III restriction enzyme [EC:3.1.21.5]	411.259	190.827	1.10778	220.432	0.790543		411.259	16.0731	4.67733	395.186	0.898035		190.827	16.0731	3.56954	174.754	0.902649			KO:K07147	msrP; methionine sulfoxide reductase catalytic subunit [EC:1.8.-.-]	71.0862	1.15347	5.94552	69.9328	0.955697		71.0862	0.0187795	11.8862	71.0674	0.999791		1.15347	0.0187795	5.94068	1.13469	0.482345
KO:K01159	ruvC; crossover junction endodeoxyribonuclease RuvC [EC:3.1.22.4]	233.066	232.07	0.00617693	0.995744	0.286813		233.066	108.661	1.1009	124.405	0.836295		232.07	108.661	1.09473	123.409	0.841934			KO:K07148	K07148; uncharacterized protein	95.3654	3.79857	4.64994	91.5668	0.865904		95.3654	0.0187795	12.3101	95.3466	0.999937		3.79857	0.0187795	7.66016	3.77979	0.663283
KO:K01160	rusA; crossover junction endodeoxyribonuclease RusA [EC:3.1.22.4]	5.31561	39.8533	-2.90639	34.5376	0.862145		5.31561	63.7369	-3.58382	58.4213	0.897617		39.8533	63.7369	-0.677432	23.8837	0.736413			KO:K07151	STT3; dolichyl-diphosphooligosaccharide---protein glycosyltransferase [EC:2.4.99.18]	35.7052	91.2227	-1.35326	55.5175	0.811745		35.7052	547.456	-3.93854	511.751	0.898035		91.2227	547.456	-2.58528	456.233	0.90068
KO:K01161	E3.1.25.1; deoxyribonuclease (pyrimidine dimer) [EC:3.1.25.1]	2.57697	21.867	-3.08501	19.2901	0.844624		2.57697	1.91063	0.431623	0.666334	0.348547		21.867	1.91063	3.51663	19.9564	0.875088			KO:K07156	copC, pcoC; copper resistance protein C	16.978	0.0284763	9.21969	16.9495	0.966332		16.978	0.0187795	9.82029	16.9592	0.963255		NA	NA	NA	NA	NA
KO:K01163	K01163; uncharacterized protein	2.93245	1.17929	1.31418	1.75315	0.404723		2.93245	0.0187795	7.2868	2.91367	0.624409		1.17929	0.0187795	5.97262	1.16051	0.482345			KO:K07157	K07157; uncharacterized protein	90.6201	59.3481	0.61063	31.272	0.664365		90.6201	0.885184	6.67771	89.7349	0.967719		59.3481	0.885184	6.06708	58.4629	0.965838
KO:K01167	E3.1.27.3; ribonuclease T1 [EC:3.1.27.3]	2.31009	0.0284763	6.34204	2.28161	0.613664		2.31009	0.0187795	6.94265	2.29131	0.624409		NA	NA	NA	NA	NA			KO:K07158	K07158; uncharacterized protein	3.23509	23.0606	-2.83355	19.8255	0.84402		3.23509	189.305	-5.87076	186.07	0.967813		23.0606	189.305	-3.03721	166.245	0.902169
KO:K01170	endA; tRNA-intron endonuclease, archaea type [EC:4.6.1.16]	28.5881	138.962	-2.28121	110.374	0.855989		28.5881	628.033	-4.45735	599.445	0.898035		138.962	628.033	-2.17615	489.071	0.894936			KO:K07160	K07160; UPF0271 protein	65.2721	28.6089	1.19	36.6632	0.795023		65.2721	0.0187795	11.7631	65.2533	0.999749		28.6089	0.0187795	10.5731	28.5901	0.991243
KO:K01173	ENDOG; endonuclease G, mitochondrial	29.0102	15.1829	0.93411	13.8273	0.684583		29.0102	0.0187795	10.5932	28.9914	0.99285		15.1829	0.0187795	9.65908	15.1641	0.951864			KO:K07172	mazE, chpAI; antitoxin MazE	42.467	16.3758	1.37478	26.0912	0.805074		42.467	0.0187795	11.143	42.4482	0.998578		16.3758	0.0187795	9.76819	16.357	0.958511
KO:K01174	nuc; micrococcal nuclease [EC:3.1.31.1]	137.35	244.422	-0.831511	107.071	0.719945		137.35	237.844	-0.792153	100.493	0.770531		244.422	237.844	0.0393582	6.57795	0.330856			KO:K07173	luxS; S-ribosylhomocysteine lyase [EC:4.4.1.21]	18.9276	5.40917	1.80701	13.5184	0.791196		18.9276	0.0187795	9.97712	18.9088	0.972413		5.40917	0.0187795	8.17011	5.39039	0.766729
KO:K01175	ybfF; esterase [EC:3.1.-.-]	3.21303	0.304222	3.40074	2.90881	0.496611		3.21303	0.0187795	7.41863	3.19425	0.695944		0.304222	0.0187795	4.0179	0.285443	0.308921			KO:K07178	RIOK1; RIO kinase 1 [EC:2.7.11.1]	11.1822	66.1159	-2.5638	54.9338	0.860508		11.1822	471.406	-5.3977	460.224	0.898035		66.1159	471.406	-2.8339	405.29	0.901688
KO:K01176	AMY, amyA, malS; alpha-amylase [EC:3.2.1.1]	86.7773	30.81	1.49392	55.9673	0.817043		86.7773	0.0187795	12.1739	86.7585	0.999895		30.81	0.0187795	10.68	30.7913	0.993142			KO:K07185	NA	16.7023	3.68882	2.17881	13.0135	0.802727		16.7023	0.0187795	9.79667	16.6835	0.963255		3.68882	0.0187795	7.61786	3.67004	0.663283
KO:K01178	SGA1; glucoamylase [EC:3.2.1.3]	0.817992	0.0284763	4.84425	0.789516	0.2862		0.817992	0.0187795	5.44486	0.799213	0.348547		NA	NA	NA	NA	NA			KO:K07214	fes; enterochelin esterase and related enzymes	25.1326	4.0179	2.64504	21.1147	0.848374		25.1326	0.0187795	10.3862	25.1138	0.989233		4.0179	0.0187795	7.74114	3.99912	0.721208
KO:K01179	E3.2.1.4; endoglucanase [EC:3.2.1.4]	403.084	497.518	-0.30367	94.4345	0.496436		403.084	414.864	-0.041559	11.7803	0.368764		497.518	414.864	0.262111	82.6542	0.53762			KO:K07226	hugZ, hutZ; heme iron utilization protein	61.1122	0.0284763	11.0675	61.0837	0.999815		61.1122	0.0187795	11.6681	61.0934	0.999665		NA	NA	NA	NA	NA
KO:K01181	E3.2.1.8, xynA; endo-1,4-beta-xylanase [EC:3.2.1.8]	6.89765	7.98482	-0.211154	1.08717	0.332148		6.89765	0.230819	4.90127	6.66683	0.724901		7.98482	0.230819	5.11242	7.754	0.736717			KO:K07235	tusD, dsrE; tRNA 2-thiouridine synthesizing protein D [EC:2.8.1.-]	11.5932	16.4075	-0.501069	4.81423	0.475964		11.5932	0.0187795	9.26991	11.5745	0.921984		16.4075	0.0187795	9.77098	16.3887	0.958511
KO:K01182	IMA, malL; oligo-1,6-glucosidase [EC:3.2.1.10]	0.263759	0.0284763	3.21139	0.235283	0.2862		0.263759	0.0187795	3.81199	0.24498	0.348547		NA	NA	NA	NA	NA			KO:K07240	chrA; chromate transporter	113.258	142.827	-0.334656	29.569	0.519293		113.258	12.7232	3.15408	100.535	0.897543		142.827	12.7232	3.48873	130.104	0.902649
KO:K01183	E3.2.1.14; chitinase [EC:3.2.1.14]	65.6015	29.7007	1.14323	35.9008	0.791323		65.6015	0.370557	7.46789	65.231	0.993958		29.7007	0.370557	6.32466	29.3301	0.958699			KO:K07242	K07242; putative multicomponent Na+:H+ antiporter subunit B	26.4349	0.872624	4.92094	25.5623	0.857441		26.4349	0.0187795	10.4591	26.4161	0.99056		0.872624	0.0187795	5.53813	0.853844	0.308921
KO:K01185	E3.2.1.17; lysozyme [EC:3.2.1.17]	8.95375	5.56801	0.685331	3.38575	0.480629		8.95375	5.59891	0.677346	3.35484	0.529668		5.56801	5.59891	-0.0079852	0.0309039	0.308921			KO:K07244	K07244; mgtE-like transporter	0.572046	11.0775	-4.27536	10.5055	0.780717		0.572046	0.0187795	4.9289	0.553266	0.348547		11.0775	0.0187795	9.20426	11.0588	0.912298
KO:K01186	NEU1; sialidase-1 [EC:3.2.1.18]	9.03667	5.18799	0.800616	3.84868	0.488099		9.03667	0.0187795	8.91049	9.01789	0.893038		5.18799	0.0187795	8.10988	5.16921	0.766729			KO:K07246	ttuC, dmlA; tartrate dehydrogenase/decarboxylase / D-malate dehydrogenase [EC:1.1.1.93 4.1.1.73 1.1.1.83]	8.0779	28.2341	-1.80539	20.1562	0.826334		8.0779	0.0187795	8.74868	8.05912	0.87488		28.2341	0.0187795	10.5541	28.2153	0.991243
KO:K01187	malZ; alpha-glucosidase [EC:3.2.1.20]	253.489	103.773	1.2885	149.716	0.803233		253.489	92.2852	1.45775	161.204	0.857527		103.773	92.2852	0.169255	11.4874	0.448875			KO:K07257	spsF; spore coat polysaccharide biosynthesis protein SpsF	29.5832	43.786	-0.565694	14.2028	0.602824		29.5832	0.0187795	10.6214	29.5644	0.993749		43.786	0.0187795	11.1871	43.7672	0.998453
KO:K01188	E3.2.1.21; beta-glucosidase [EC:3.2.1.21]	0.0284763	0.173524	-2.6073	0.145047	0.2862		NA	NA	NA	NA	NA		0.173524	0.0187795	3.2079	0.154744	0.308921			KO:K07260	vanY; zinc D-Ala-D-Ala carboxypeptidase [EC:3.4.17.14]	50.6	2.39652	4.40012	48.2035	0.86531		50.6	0.0187795	11.3958	50.5813	0.999373		2.39652	0.0187795	6.99564	2.37774	0.588898
KO:K01190	lacZ; beta-galactosidase [EC:3.2.1.23]	42.6204	37.1507	0.198155	5.4697	0.399046		42.6204	101.083	-1.24592	58.4625	0.844815		37.1507	101.083	-1.44408	63.9322	0.864033			KO:K07267	oprB; porin	9.28893	12.5005	-0.4284	3.21156	0.441975		9.28893	0.0187795	8.95021	9.27015	0.893038		12.5005	0.0187795	9.37861	12.4817	0.924912
KO:K01191	MAN2C1; alpha-mannosidase [EC:3.2.1.24]	119.372	124.498	-0.0606595	5.12613	0.313927		119.372	78.4546	0.605535	40.9175	0.730619		124.498	78.4546	0.666195	46.0436	0.743962			KO:K07281	ipct; 1L-myo-inositol 1-phosphate cytidylyltransferase [EC:2.7.7.74]	5.74298	42.4132	-2.88464	36.6702	0.862807		5.74298	0.44885	3.67749	5.29413	0.691668		42.4132	0.44885	6.56214	41.9643	0.964525
KO:K01192	E3.2.1.25, MANBA, manB; beta-mannosidase [EC:3.2.1.25]	121.47	120.211	0.0150284	1.25878	0.289628		121.47	224.628	-0.886936	103.158	0.786149		120.211	224.628	-0.901964	104.417	0.790539			KO:K07282	capA, pgsA; gamma-polyglutamate biosynthesis protein CapA	107.959	96.8524	0.156626	11.1067	0.389316		107.959	14.34	2.91237	93.6191	0.897167		96.8524	14.34	2.75574	82.5124	0.90068
KO:K01193	INV, sacA; beta-fructofuranosidase [EC:3.2.1.26]	33.904	28.1057	0.270593	5.79829	0.43135		33.904	71.969	-1.08592	38.065	0.833243		28.1057	71.969	-1.35651	43.8633	0.859555			KO:K07285	slp; outer membrane lipoprotein	11.3129	14.5074	-0.358819	3.1945	0.423422		11.3129	0.0187795	9.2346	11.2942	0.921984		14.5074	0.0187795	9.59342	14.4887	0.944033
KO:K01194	TREH, treA, treF; alpha,alpha-trehalase [EC:3.2.1.28]	16.3439	9.86151	0.728869	6.48236	0.565504		16.3439	0.0187795	9.76538	16.3251	0.963255		9.86151	0.0187795	9.03651	9.84273	0.879086			KO:K07291	dipps; CDP-L-myo-inositol myo-inositolphosphotransferase [EC:2.7.8.34]	17.9682	61.0678	-1.76497	43.0996	0.840641		17.9682	7.91787	1.18226	10.0503	0.753868		61.0678	7.91787	2.94723	53.1499	0.900996
KO:K01195	uidA, GUSB; beta-glucuronidase [EC:3.2.1.31]	15.1815	14.3836	0.0778917	0.797923	0.2862		15.1815	1.37672	3.46301	13.8048	0.840571		14.3836	1.37672	3.38512	13.0069	0.837761			KO:K07302	iorA; isoquinoline 1-oxidoreductase subunit alpha [EC:1.3.99.16]	15.43	13.4999	0.192782	1.93003	0.332148		15.43	0.0187795	9.68236	15.4112	0.957359		13.4999	0.0187795	9.48958	13.4812	0.935135
KO:K01197	hya; hyaluronoglucosaminidase [EC:3.2.1.35]	43.7964	20.7593	1.07705	23.0371	0.778155		43.7964	24.8197	0.819324	18.9766	0.752289		20.7593	24.8197	-0.257729	4.06042	0.455639			KO:K07303	iorB; isoquinoline 1-oxidoreductase subunit beta [EC:1.3.99.16]	18.2169	10.7894	0.755666	7.42754	0.595501		18.2169	0.0187795	9.92191	18.1982	0.972413		10.7894	0.0187795	9.16624	10.7706	0.89687
KO:K01198	xynB; xylan 1,4-beta-xylosidase [EC:3.2.1.37]	0.414454	3.89375	-3.23188	3.4793	0.56643		0.414454	0.0187795	4.46398	0.395674	0.348547		3.89375	0.0187795	7.69586	3.87497	0.663283			KO:K07304	msrA; peptide-methionine (S)-S-oxide reductase [EC:1.8.4.11]	102.564	17.0901	2.58529	85.4738	0.863635		102.564	0.0187795	12.4151	102.545	0.999948		17.0901	0.0187795	9.82979	17.0713	0.963669
KO:K01200	pulA; pullulanase [EC:3.2.1.41]	9.89473	1.57778	2.64877	8.31696	0.744673		9.89473	0.0187795	9.04136	9.87596	0.893038		1.57778	0.0187795	6.39259	1.559	0.482345			KO:K07305	msrB; peptide-methionine (R)-S-oxide reductase [EC:1.8.4.12]	81.63	3.06008	4.73746	78.5699	0.865865		81.63	0.0187795	12.0857	81.6112	0.999843		3.06008	0.0187795	7.34827	3.0413	0.663283
KO:K01201	GBA, srfJ; glucosylceramidase [EC:3.2.1.45]	1.11076	0.0284763	5.28564	1.08228	0.494595		1.11076	0.0187795	5.88624	1.09198	0.524096		NA	NA	NA	NA	NA			KO:K07313	pphA; serine/threonine protein phosphatase 1 [EC:3.1.3.16]	26.4424	38.0023	-0.523234	11.5599	0.57761		26.4424	0.0187795	10.4595	26.4236	0.99056		38.0023	0.0187795	10.9827	37.9836	0.99721
KO:K01205	NAGLU; alpha-N-acetylglucosaminidase [EC:3.2.1.50]	0.0284763	0.224955	-2.9818	0.196478	0.2862		NA	NA	NA	NA	NA		0.224955	0.0187795	3.58241	0.206175	0.308921			KO:K07315	rsbU_P; phosphoserine phosphatase RsbU/P [EC:3.1.3.3]	255.593	27.124	3.23621	228.469	0.86567		255.593	0.171422	10.5421	255.421	1		27.124	0.171422	7.30587	26.9525	0.976694
KO:K01206	FUCA; alpha-L-fucosidase [EC:3.2.1.51]	97.1582	214.188	-1.14047	117.03	0.793611		97.1582	491.308	-2.33822	394.15	0.893592		214.188	491.308	-1.19775	277.121	0.848136			KO:K07318	K07318; adenine-specific DNA-methyltransferase [EC:2.1.1.72]	96.6387	16.0187	2.59285	80.6201	0.863625		96.6387	1.36207	6.14873	95.2766	0.96775		16.0187	1.36207	3.55588	14.6566	0.846706
KO:K01207	nagZ; beta-N-acetylhexosaminidase [EC:3.2.1.52]	79.9668	135.171	-0.75731	55.204	0.705376		79.9668	94.9666	-0.24802	14.9999	0.53225		135.171	94.9666	0.50929	40.2041	0.68585			KO:K07319	yhdJ; adenine-specific DNA-methyltransferase [EC:2.1.1.72]	77.8848	2.62088	4.89322	75.2639	0.865865		77.8848	0.0187795	12.018	77.866	0.999843		2.62088	0.0187795	7.12475	2.6021	0.588898
KO:K01208	cd, ma, nplT; cyclomaltodextrinase / maltogenic alpha-amylase / neopullulanase [EC:3.2.1.54 3.2.1.133 3.2.1.135]	22.2583	0.375861	5.888	21.8824	0.940466		22.2583	0.0187795	10.211	22.2395	0.98411		0.375861	0.0187795	4.32297	0.357082	0.308921			KO:K07321	cooC; CO dehydrogenase maturation factor	79.7989	182.2	-1.19108	102.401	0.79701		79.7989	0.488456	7.352	79.3105	0.994052		182.2	0.488456	8.54308	181.712	0.999848
KO:K01209	abfA; alpha-N-arabinofuranosidase [EC:3.2.1.55]	95.9875	128.99	-0.426337	33.0021	0.580473		95.9875	412.59	-2.10379	316.602	0.888365		128.99	412.59	-1.67745	283.6	0.882204			KO:K07322	ytfE, scdA; regulator of cell morphogenesis and NO signaling	19.0585	16.6852	0.191863	2.37326	0.35859		19.0585	0.0187795	9.98706	19.0397	0.976301		16.6852	0.0187795	9.7952	16.6664	0.958511
KO:K01210	E3.2.1.58; glucan 1,3-beta-glucosidase [EC:3.2.1.58]	0.188328	0.267951	-0.508726	0.0796235	0.2862		0.188328	0.0187795	3.32602	0.169548	0.348547		0.267951	0.0187795	3.83474	0.249172	0.308921			KO:K07323	mlaC; phospholipid transport system substrate-binding protein	13.9146	6.09777	1.19024	7.81681	0.666138		13.9146	0.0187795	9.53322	13.8958	0.942578		6.09777	0.0187795	8.34298	6.07899	0.803623
KO:K01212	sacC, levB; levanase [EC:3.2.1.65]	0.839632	9.22738	-3.45809	8.38775	0.746494		0.839632	15.3513	-4.19246	14.5117	0.848986		9.22738	15.3513	-0.734372	6.12396	0.601676			KO:K07330	flaG-A, flaG; archaeal flagellar protein FlaG	9.69357	21.8305	-1.17125	12.1369	0.736677		9.69357	0.202014	5.5845	9.49156	0.791146		21.8305	0.202014	6.75575	21.6285	0.966389
KO:K01213	E3.2.1.67; galacturan 1,4-alpha-galacturonidase [EC:3.2.1.67]	0.108076	0.0284763	1.92422	0.0796	0.2862		0.108076	0.0187795	2.52482	0.0892968	0.348547		NA	NA	NA	NA	NA			KO:K07332	flaI-A, flaI; archaeal flagellar protein FlaI	35.8213	173.908	-2.27944	138.087	0.855989		35.8213	1114.36	-4.95925	1078.54	0.898035		173.908	1114.36	-2.67982	940.451	0.900703
KO:K01216	E3.2.1.73; licheninase [EC:3.2.1.73]	3.29158	2.32898	0.499084	0.962604	0.2862		3.29158	0.0187795	7.45348	3.27281	0.695944		2.32898	0.0187795	6.9544	2.3102	0.588898			KO:K07333	flaJ-A, flaJ; archaeal flagellar protein FlaJ	26.5201	112.095	-2.07957	85.5752	0.854889		26.5201	722.945	-4.76873	696.425	0.898035		112.095	722.945	-2.68916	610.85	0.900703
KO:K01218	gmuG; mannan endo-1,4-beta-mannosidase [EC:3.2.1.78]	6.04627	19.9089	-1.7193	13.8627	0.788167		6.04627	0.687811	3.13596	5.35846	0.691668		19.9089	0.687811	4.85526	19.2211	0.875205			KO:K07336	K07336; PKHD-type hydroxylase [EC:1.14.11.-]	12.2527	0.0915748	7.06393	12.1611	0.930376		12.2527	0.0187795	9.34972	12.2339	0.93317		0.0915748	0.0187795	2.28579	0.0727953	0.308921
KO:K01219	E3.2.1.81; beta-agarase [EC:3.2.1.81]	59.0372	89.7117	-0.603671	30.6745	0.662554		59.0372	181.923	-1.62363	122.886	0.875465		89.7117	181.923	-1.01996	92.2112	0.839683			KO:K07388	K07388; hydrogenase expression/formation protein	0.0284763	1.94799	-6.09608	1.91951	0.494595		0.0187795	14.0313	-9.54528	14.0126	0.950951		1.94799	14.0313	-2.84859	12.0833	0.826717
KO:K01220	E3.2.1.85, lacG; 6-phospho-beta-galactosidase [EC:3.2.1.85]	0.242417	0.0284763	3.08965	0.21394	0.2862		0.242417	0.0187795	3.69026	0.223637	0.348547		NA	NA	NA	NA	NA			KO:K07390	grxD, GLRX5; monothiol glutaredoxin	35.2768	1.09461	5.01023	34.1822	0.863216		35.2768	0.0187795	10.8753	35.258	0.996843		1.09461	0.0187795	5.86511	1.07583	0.482345
KO:K01222	E3.2.1.86A, celF; 6-phospho-beta-glucosidase [EC:3.2.1.86]	36.5436	19.0342	0.941024	17.5094	0.706963		36.5436	0.0187795	10.9262	36.5248	0.997198		19.0342	0.0187795	9.98522	19.0154	0.972438			KO:K07395	K07395; putative proteasome-type protease	22.3112	0.0284763	9.61379	22.2827	0.986745		22.3112	0.0187795	10.2144	22.2924	0.98411		NA	NA	NA	NA	NA
KO:K01224	E3.2.1.89; arabinogalactan endo-1,4-beta-galactosidase [EC:3.2.1.89]	3.35389	8.82596	-1.39592	5.47207	0.622556		3.35389	0.0187795	7.48054	3.33511	0.695944		8.82596	0.0187795	8.87645	8.80718	0.858335			KO:K07399	resB, ccs1; cytochrome c biogenesis protein	83.4521	48.863	0.772206	34.5891	0.704967		83.4521	5.03672	4.05039	78.4154	0.897878		48.863	5.03672	3.27819	43.8263	0.900879
KO:K01227	E3.2.1.96; mannosyl-glycoprotein endo-beta-N-acetylglucosaminidase [EC:3.2.1.96]	0.736214	0.0284763	4.69229	0.707737	0.2862		0.736214	0.0187795	5.2929	0.717434	0.348547		NA	NA	NA	NA	NA			KO:K07443	ybaZ; methylated-DNA-protein-cysteine methyltransferase related protein	119.943	58.1331	1.04492	61.8098	0.787739		119.943	0.0187795	12.6409	119.924	1		58.1331	0.0187795	11.596	58.1143	0.999472
KO:K01233	csn; chitosanase [EC:3.2.1.132]	0.582512	0.0284763	4.35445	0.554035	0.2862		0.582512	0.0187795	4.95506	0.563732	0.348547		NA	NA	NA	NA	NA			KO:K07444	ypsC; putative N6-adenine-specific DNA methylase [EC:2.1.1.-]	8.69112	19.3247	-1.15283	10.6336	0.713829		8.69112	238.437	-4.77792	229.746	0.898035		19.3247	238.437	-3.62509	219.112	0.902708
KO:K01234	NA	28.243	6.92197	2.02864	21.321	0.839618		28.243	0.0187795	10.5545	28.2242	0.99285		6.92197	0.0187795	8.52588	6.90319	0.803623			KO:K07446	trm-G10; tRNA (guanine10-N2)-dimethyltransferase [EC:2.1.1.213]	16.2706	46.3896	-1.51154	30.119	0.813342		16.2706	345.189	-4.40705	328.918	0.898035		46.3896	345.189	-2.89551	298.799	0.901688
KO:K01235	aguA; alpha-glucuronidase [EC:3.2.1.139]	1.37694	2.60678	-0.920806	1.22984	0.377074		1.37694	0.0187795	6.19616	1.35816	0.524096		2.60678	0.0187795	7.11697	2.588	0.588898			KO:K07451	mcrA; 5-methylcytosine-specific restriction enzyme A [EC:3.1.21.-]	5.62832	24.8649	-2.14333	19.2366	0.834418		5.62832	0.262034	4.42488	5.36629	0.691668		24.8649	0.262034	6.56821	24.6029	0.952169
KO:K01236	treZ, glgZ; maltooligosyltrehalose trehalohydrolase [EC:3.2.1.141]	52.4062	2.59671	4.33498	49.8095	0.865368		52.4062	0.0187795	11.4464	52.3874	0.999446		2.59671	0.0187795	7.11139	2.57793	0.588898			KO:K07461	K07461; putative endonuclease	51.3356	6.33172	3.01929	45.0039	0.864589		51.3356	0.141299	8.50507	51.1943	0.998955		6.33172	0.141299	5.48578	6.19043	0.706753
KO:K01239	iunH; purine nucleosidase [EC:3.2.2.1]	115.223	138.321	-0.263594	23.0983	0.472536		115.223	512.087	-2.15196	396.864	0.88848		138.321	512.087	-1.88837	373.766	0.886131			KO:K07472	TIP49; TBP-interacting protein	0.676627	11.2844	-4.05983	10.6078	0.780717		0.676627	116.572	-7.42864	115.895	0.994198		11.2844	116.572	-3.36882	105.287	0.902544
KO:K01240	URH1; uridine nucleosidase [EC:3.2.2.3]	11.7591	0.0284763	8.6898	11.7306	0.927269		11.7591	0.0187795	9.2904	11.7403	0.921984		NA	NA	NA	NA	NA			KO:K07481	K07481; transposase, IS5 family	88.0167	14.2457	2.62726	73.7711	0.863625		88.0167	0.0187795	12.1944	87.9979	0.999895		14.2457	0.0187795	9.56715	14.2269	0.944033
KO:K01241	amn; AMP nucleosidase [EC:3.2.2.4]	3.19642	0.3842	3.05653	2.81222	0.496611		3.19642	0.0187795	7.41116	3.17764	0.695944		0.3842	0.0187795	4.35463	0.36542	0.308921			KO:K07483	K07483; transposase	9.90629	17.0799	-0.785879	7.17356	0.598305		9.90629	0.0187795	9.04304	9.88751	0.893038		17.0799	0.0187795	9.82892	17.0611	0.963669
KO:K01243	mtnN, mtn, pfs; adenosylhomocysteine nucleosidase [EC:3.2.2.9]	39.9051	6.49207	2.61982	33.413	0.860606		39.9051	0.0187795	11.0532	39.8863	0.99792		6.49207	0.0187795	8.43338	6.47329	0.803623			KO:K07484	K07484; transposase	43.9845	5.65235	2.96008	38.3322	0.863245		43.9845	0.0187795	11.1936	43.9658	0.998766		5.65235	0.0187795	8.23355	5.63357	0.766729
KO:K01246	tag; DNA-3-methyladenine glycosylase I [EC:3.2.2.20]	6.91123	1.08546	2.67064	5.82577	0.661765		6.91123	0.0187795	8.52364	6.89245	0.826406		1.08546	0.0187795	5.853	1.06668	0.482345			KO:K07485	K07485; transposase	2.3818	28.6493	-3.58838	26.2675	0.858629		2.3818	0.0187795	6.98675	2.36302	0.624409		28.6493	0.0187795	10.5751	28.6305	0.991243
KO:K01247	alkA; DNA-3-methyladenine glycosylase II [EC:3.2.2.21]	39.9458	15.1328	1.40036	24.813	0.803282		39.9458	1.35159	4.88532	38.5942	0.895704		15.1328	1.35159	3.48495	13.7812	0.837819			KO:K07486	K07486; transposase	390.78	186.495	1.06722	204.284	0.788917		390.78	0.0187795	14.3449	390.761	1		186.495	0.0187795	13.2777	186.476	1
KO:K01250	rihA; pyrimidine-specific ribonucleoside hydrolase [EC:3.2.-.-]	15.2418	88.2364	-2.53334	72.9946	0.860791		15.2418	133.82	-3.13419	118.578	0.897596		88.2364	133.82	-0.600845	45.5833	0.729906			KO:K07487	K07487; transposase	27.9178	0.917078	4.92799	27.0007	0.859505		27.9178	0.0187795	10.5378	27.899	0.991846		0.917078	0.0187795	5.60982	0.898299	0.308921
KO:K01251	E3.3.1.1, ahcY; adenosylhomocysteinase [EC:3.3.1.1]	274.788	433.021	-0.656116	158.233	0.678331		274.788	445.327	-0.696544	170.539	0.751579		433.021	445.327	-0.0404279	12.3059	0.331102			KO:K07492	K07492; putative transposase	337.816	160.688	1.07197	177.128	0.788917		337.816	1.91413	7.46341	335.902	0.994209		160.688	1.91413	6.39143	158.774	0.966366
KO:K01253	EPHX1; microsomal epoxide hydrolase [EC:3.3.2.9]	2.10328	0.724655	1.53727	1.37862	0.404723		2.10328	0.0187795	6.80734	2.0845	0.624409		0.724655	0.0187795	5.27007	0.705876	0.308921			KO:K07493	K07493; putative transposase	163.078	382.297	-1.22913	219.219	0.801286		163.078	13.6932	3.57403	149.385	0.897993		382.297	13.6932	4.80316	368.603	0.902767
KO:K01255	CARP, pepA; leucyl aminopeptidase [EC:3.4.11.1]	198.527	164.038	0.275305	34.4889	0.482908		198.527	179.706	0.14369	18.8201	0.452958		164.038	179.706	-0.131616	15.6689	0.414338			KO:K07494	K07494; putative transposase	1673.49	85.1578	4.29657	1588.33	0.865914		1673.49	1.84236	9.82708	1671.65	1		85.1578	1.84236	5.53051	83.3155	0.902661
KO:K01256	pepN; aminopeptidase N [EC:3.4.11.2]	60.4214	86.8175	-0.522925	26.396	0.614589		60.4214	332.301	-2.45936	271.88	0.89378		86.8175	332.301	-1.93644	245.484	0.886295			KO:K07497	K07497; putative transposase	35.2811	107.14	-1.60253	71.859	0.840095		35.2811	0.0187795	10.8755	35.2623	0.996843		107.14	0.0187795	12.4781	107.121	0.999977
KO:K01258	pepT; tripeptide aminopeptidase [EC:3.4.11.4]	132.964	96.507	0.462331	36.4571	0.592306		132.964	243.699	-0.874066	110.735	0.784487		96.507	243.699	-1.3364	147.192	0.86068			KO:K07498	K07498; putative transposase	36.7647	81.3623	-1.14604	44.5977	0.793017		36.7647	8.00953	2.19853	28.7551	0.881769		81.3623	8.00953	3.34457	73.3528	0.902345
KO:K01259	pip; proline iminopeptidase [EC:3.4.11.5]	72.2214	19.8937	1.86011	52.3277	0.843777		72.2214	0.256041	8.13991	71.9654	0.998871		19.8937	0.256041	6.2798	19.6377	0.938804			KO:K07499	K07499; putative transposase	64.391	18.1177	1.82946	46.2733	0.843358		64.391	0.0187795	11.7435	64.3722	0.999728		18.1177	0.0187795	9.91402	18.0989	0.968382
KO:K01262	pepP; Xaa-Pro aminopeptidase [EC:3.4.11.9]	414.796	523.085	-0.334644	108.289	0.520199		414.796	267.863	0.630906	146.933	0.735773		523.085	267.863	0.96555	255.222	0.795135			KO:K07500	K07500; DNA endonuclease	44.529	99.207	-1.1557	54.678	0.793699		44.529	14.4706	1.62162	30.0584	0.869914		99.207	14.4706	2.77731	84.7364	0.900703
KO:K01265	map; methionyl aminopeptidase [EC:3.4.11.18]	269.959	341.409	-0.338757	71.4493	0.524513		269.959	399.336	-0.564862	129.377	0.700805		341.409	399.336	-0.226105	57.9277	0.509906			KO:K07501	K07501; 3'-5' exonuclease	39.0621	46.2843	-0.244755	7.22224	0.433853		39.0621	0.0187795	11.0224	39.0433	0.99792		46.2843	0.0187795	11.2672	46.2655	0.998781
KO:K01266	dmpA, dap; D-aminopeptidase [EC:3.4.11.19]	12.2626	71.4171	-2.54201	59.1545	0.860625		12.2626	0.0187795	9.35089	12.2438	0.93317		71.4171	0.0187795	11.8929	71.3983	0.99973			KO:K07516	fadN; 3-hydroxyacyl-CoA dehydrogenase [EC:1.1.1.35]	302.002	134.865	1.16304	167.137	0.79403		302.002	14.126	4.41814	287.876	0.898035		134.865	14.126	3.2551	120.739	0.902415
KO:K01270	pepD; dipeptidase D [EC:3.4.13.-]	13.0242	2.82804	2.20332	10.1962	0.77126		13.0242	0.0187795	9.43782	13.0054	0.942578		2.82804	0.0187795	7.2345	2.80926	0.588898			KO:K07536	badI; 2-ketocyclohexanecarboxyl-CoA hydrolase [EC:3.1.2.-]	6.28515	37.2798	-2.56837	30.9946	0.856525		6.28515	0.332351	4.24117	5.9528	0.691668		37.2798	0.332351	6.80954	36.9474	0.984361
KO:K01271	pepQ; Xaa-Pro dipeptidase [EC:3.4.13.9]	117.209	239.904	-1.03338	122.695	0.787729		117.209	332.835	-1.50573	215.626	0.858196		239.904	332.835	-0.472352	92.9312	0.667397			KO:K07537	dch; cyclohexa-1,5-dienecarbonyl-CoA hydratase [EC:4.2.1.100]	12.154	57.3609	-2.23863	45.2069	0.855132		12.154	0.441171	4.78395	11.7129	0.82005		57.3609	0.441171	7.02259	56.9197	0.986987
KO:K01273	DPEP; membrane dipeptidase [EC:3.4.13.19]	108.634	156.494	-0.526639	47.8606	0.621065		108.634	560.648	-2.36763	452.014	0.893592		156.494	560.648	-1.84099	404.154	0.885721			KO:K07546	bbsH; E-phenylitaconyl-CoA hydratase [EC:4.2.1.-]	0.971923	37.097	-5.25432	36.1251	0.953769		0.971923	0.315563	1.62291	0.65636	0.348547		37.097	0.315563	6.87723	36.7815	0.984361
KO:K01274	E3.4.13.-; D-alanyl-D-alanine dipeptidase [EC:3.4.13.-]	4.07747	0.0284763	7.16177	4.04899	0.749981		4.07747	0.0187795	7.76237	4.05869	0.749843		NA	NA	NA	NA	NA			KO:K07552	bcr, tcaB; MFS transporter, DHA1 family, multidrug resistance protein	15.7169	6.3885	1.29877	9.32845	0.708171		15.7169	0.0187795	9.70895	15.6982	0.957359		6.3885	0.0187795	8.41018	6.36972	0.803623
KO:K01277	DPP3; dipeptidyl-peptidase III [EC:3.4.14.4]	0.475738	0.0284763	4.06233	0.447261	0.2862		0.475738	0.0187795	4.66294	0.456958	0.348547		NA	NA	NA	NA	NA			KO:K07562	NMD3; nonsense-mediated mRNA decay protein 3	0.454119	5.27695	-3.53856	4.82283	0.618777		0.454119	66.0749	-7.18489	65.6208	0.98641		5.27695	66.0749	-3.64633	60.798	0.902216
KO:K01278	DPP4, CD26; dipeptidyl-peptidase 4 [EC:3.4.14.5]	35.5141	35.5709	-0.00230491	0.0567841	0.2862		35.5141	0.174341	7.67033	35.3397	0.991052		35.5709	0.174341	7.67264	35.3965	0.990715			KO:K07571	K07571; S1 RNA binding domain protein	12.2847	15.9186	-0.37385	3.6339	0.423422		12.2847	0.0187795	9.35349	12.266	0.93317		15.9186	0.0187795	9.72734	15.8999	0.951864
KO:K01283	ACE, CD143; peptidyl-dipeptidase A [EC:3.4.15.1]	17.3955	18.3108	-0.0739863	0.91537	0.2862		17.3955	12.4675	0.480544	4.92801	0.526322		18.3108	12.4675	0.55453	5.84338	0.543365			KO:K07574	yhbY; RNA-binding protein	8.68504	4.17099	1.05814	4.51405	0.576938		8.68504	58.5066	-2.75199	49.8216	0.895317		4.17099	58.5066	-3.81014	54.3356	0.902075
KO:K01284	dcp; peptidyl-dipeptidase Dcp [EC:3.4.15.5]	8.0498	1.15448	2.80171	6.89532	0.695014		8.0498	0.0187795	8.74365	8.03102	0.87488		1.15448	0.0187795	5.94194	1.1357	0.482345			KO:K07578	K07578; homologs of the eukaryotic argonaute protein	53.4847	0.699896	6.25584	52.7848	0.982557		53.4847	0.239525	7.80281	53.2452	0.996948		0.699896	0.239525	1.54696	0.460371	0.308921
KO:K01286	E3.4.16.4; D-alanyl-D-alanine carboxypeptidase [EC:3.4.16.4]	18.172	11.4033	0.67226	6.76864	0.559145		18.172	0.0187795	9.91834	18.1532	0.972413		11.4033	0.0187795	9.24608	11.3845	0.912298			KO:K07579	K07579; putative methylase	1.94958	17.7008	-3.18257	15.7512	0.826432		1.94958	157.92	-6.33989	155.971	0.967813		17.7008	157.92	-3.15731	140.219	0.902169
KO:K01291	CPB1; carboxypeptidase B [EC:3.4.17.2]	0.0284763	0.255756	-3.16693	0.227279	0.2862		NA	NA	NA	NA	NA		0.255756	0.0187795	3.76754	0.236976	0.308921			KO:K07580	K07580; Zn-ribbon RNA-binding protein	0.644546	13.8425	-4.42468	13.198	0.812554		0.644546	137.599	-7.73797	136.954	0.99747		13.8425	137.599	-3.31329	123.756	0.902427
KO:K01295	cpg; glutamate carboxypeptidase [EC:3.4.17.11]	73.3387	30.388	1.27107	42.9507	0.801734		73.3387	10.7709	2.76744	62.5679	0.895714		30.388	10.7709	1.49637	19.6172	0.838218			KO:K07584	ysxB; uncharacterized protein	11.2908	9.07948	0.314465	2.21131	0.379947		11.2908	0.0187795	9.23177	11.272	0.921984		9.07948	0.0187795	8.91731	9.0607	0.879086
KO:K01297	ldcA; muramoyltetrapeptide carboxypeptidase [EC:3.4.17.13]	95.4763	82.6641	0.207881	12.8121	0.426441		95.4763	14.1018	2.75926	81.3744	0.895871		82.6641	14.1018	2.55138	68.5623	0.898769			KO:K07590	RP-L7A, rplGB; large subunit ribosomal protein L7A	1.8772	15.6271	-3.0574	13.7499	0.812125		1.8772	0.0187795	6.64328	1.85842	0.524096		15.6271	0.0187795	9.70068	15.6084	0.951864
KO:K01298	CPA2; carboxypeptidase A2 [EC:3.4.17.15]	29.6552	4.42786	2.7436	25.2273	0.855269		29.6552	0.0187795	10.6249	29.6364	0.993749		4.42786	0.0187795	7.88131	4.40908	0.721208			KO:K07642	baeS, smeS; two-component system, OmpR family, sensor histidine kinase BaeS [EC:2.7.13.3]	124.746	83.4601	0.579834	41.2859	0.66306		124.746	11.8032	3.40174	112.943	0.897951		83.4601	11.8032	2.8219	71.6569	0.901419
KO:K01299	E3.4.17.19; carboxypeptidase Taq [EC:3.4.17.19]	181.104	111.855	0.695192	69.2492	0.688878		181.104	82.1111	1.14117	98.9927	0.838626		111.855	82.1111	0.445975	29.7435	0.654467			KO:K07646	kdpD; two-component system, OmpR family, sensor histidine kinase KdpD [EC:2.7.13.3]	50.8891	5.40474	3.23506	45.4844	0.864813		50.8891	0.0187795	11.404	50.8703	0.999373		5.40474	0.0187795	8.16892	5.38596	0.766729
KO:K01301	NAALAD; N-acetylated-alpha-linked acidic dipeptidase [EC:3.4.17.21]	6.05051	15.1799	-1.32704	9.12941	0.716508		6.05051	0.0187795	8.33176	6.03173	0.826406		15.1799	0.0187795	9.65879	15.1611	0.951864			KO:K07659	ompR; two-component system, OmpR family, phosphate regulon response regulator OmpR	4.78779	19.5508	-2.0298	14.763	0.809028		4.78779	0.0187795	7.99406	4.76901	0.749843		19.5508	0.0187795	10.0239	19.532	0.972438
KO:K01302	CPQ; carboxypeptidase Q [EC:3.4.17.-]	4.96342	1.3904	1.83584	3.57302	0.55822		4.96342	0.0187795	8.04603	4.94464	0.749843		1.3904	0.0187795	6.21019	1.37162	0.482345			KO:K07665	cusR, copR, silR; two-component system, OmpR family, copper resistance phosphate regulon response regulator CusR	14.6369	27.273	-0.897866	12.6361	0.674669		14.6369	0.0187795	9.60624	14.6181	0.950951		27.273	0.0187795	10.5041	27.2542	0.990199
KO:K01303	APEH; acylaminoacyl-peptidase [EC:3.4.19.1]	39.8431	76.1148	-0.933848	36.2717	0.730668		39.8431	284.89	-2.83801	245.047	0.897219		76.1148	284.89	-1.90416	208.775	0.886131			KO:K07669	mprA; two-component system, OmpR family, response regulator MprA	37.1896	35.6011	0.0629778	1.58851	0.30373		37.1896	0.0187795	10.9515	37.1708	0.997407		35.6011	0.0187795	10.8885	35.5823	0.996272
KO:K01304	pcp; pyroglutamyl-peptidase [EC:3.4.19.3]	33.9081	6.58942	2.36341	27.3187	0.854071		33.9081	0.45085	6.23284	33.4572	0.963715		6.58942	0.45085	3.86943	6.13857	0.706753			KO:K07670	mtrA; two-component system, OmpR family, response regulator MtrA	74.8436	16.0528	2.22105	58.7908	0.855746		74.8436	0.0187795	11.9605	74.8248	0.999822		16.0528	0.0187795	9.73945	16.034	0.958511
KO:K01305	iadA; beta-aspartyl-dipeptidase (metallo-type) [EC:3.4.19.-]	2.12184	6.7484	-1.66923	4.62656	0.606584		2.12184	0.0187795	6.82002	2.10306	0.624409		6.7484	0.0187795	8.48925	6.72962	0.803623			KO:K07679	evgS, bvgS; two-component system, NarL family, sensor histidine kinase EvgS [EC:2.7.13.3]	11.4	0.0284763	8.64505	11.3715	0.927269		11.4	0.0187795	9.24566	11.3812	0.921984		NA	NA	NA	NA	NA
KO:K01312	PRSS1_2_3; trypsin [EC:3.4.21.4]	0.258563	0.0284763	3.18268	0.230086	0.2862		0.258563	0.0187795	3.78329	0.239783	0.348547		NA	NA	NA	NA	NA			KO:K07689	uvrY, gacA, varA; two-component system, NarL family, invasion response regulator UvrY	0.264286	22.2027	-6.3925	21.9385	0.967647		0.264286	0.0187795	3.81487	0.245506	0.348547		22.2027	0.0187795	10.2074	22.184	0.981489
KO:K01317	ACR; acrosin [EC:3.4.21.10]	0.149617	0.0284763	2.39344	0.12114	0.2862		0.149617	0.0187795	2.99404	0.130837	0.348547		NA	NA	NA	NA	NA			KO:K07692	degU; two-component system, NarL family, response regulator DegU	4.73497	17.2086	-1.8617	12.4736	0.78209		4.73497	0.0187795	7.97806	4.71619	0.749843		17.2086	0.0187795	9.83976	17.1898	0.963669
KO:K01318	sspA; glutamyl endopeptidase [EC:3.4.21.19]	0.310679	0.0284763	3.44759	0.282203	0.2862		0.310679	0.0187795	4.0482	0.2919	0.348547		NA	NA	NA	NA	NA			KO:K07710	atoS; two-component system, NtrC family, sensor histidine kinase AtoS [EC:2.7.13.3]	50.8316	16.7367	1.60271	34.0949	0.837446		50.8316	0.852889	5.89722	49.9787	0.967102		16.7367	0.852889	4.29451	15.8838	0.854642
KO:K01322	PREP; prolyl oligopeptidase [EC:3.4.21.26]	78.9247	34.751	1.18342	44.1737	0.795403		78.9247	78.1503	0.0142251	0.774378	0.348547		34.751	78.1503	-1.1692	43.3993	0.845897			KO:K07713	zraR, hydG; two-component system, NtrC family, response regulator HydG	62.8647	63.5408	-0.0154324	0.676071	0.2862		62.8647	0.20901	8.23253	62.6557	0.998766		63.5408	0.20901	8.24797	63.3318	0.998652
KO:K01338	lon; ATP-dependent Lon protease [EC:3.4.21.53]	592.597	533.916	0.150438	58.681	0.384914		592.597	526.483	0.170664	66.114	0.478894		533.916	526.483	0.0202261	7.43308	0.31612			KO:K07725	csa3; CRISPR-associated protein Csa3	4.44643	25.1058	-2.4973	20.6593	0.843037		4.44643	247.232	-5.79708	242.786	0.967813		25.1058	247.232	-3.29978	222.127	0.902427
KO:K01341	KEX2; kexin [EC:3.4.21.61]	3.36202	0.0284763	6.88342	3.33355	0.693553		3.36202	0.0187795	7.48403	3.34324	0.695944		NA	NA	NA	NA	NA			KO:K07727	K07727; putative transcriptional regulator	15.5871	2.30485	2.75761	13.2823	0.81044		15.5871	0.0187795	9.69698	15.5684	0.957359		2.30485	0.0187795	6.93937	2.28607	0.588898
KO:K01342	aprE; subtilisin [EC:3.4.21.62]	30.6319	44.0046	-0.522621	13.3727	0.589258		30.6319	0.547818	5.80519	30.084	0.962241		44.0046	0.547818	6.32781	43.4568	0.964818			KO:K07728	K07728; putative transcriptional regulator	0.439313	3.21484	-2.87142	2.77553	0.496611		0.439313	81.0076	-7.52666	80.5683	0.994052		3.21484	81.0076	-4.65524	77.7928	0.902603
KO:K01354	ptrB; oligopeptidase B [EC:3.4.21.83]	38.5843	1.6807	4.52088	36.9036	0.863898		38.5843	0.447212	6.43091	38.1371	0.965482		1.6807	0.447212	1.91003	1.23348	0.418746			KO:K07731	K07731; putative transcriptional regulator	12.5668	44.4011	-1.82098	31.8343	0.840319		12.5668	304.721	-4.5998	292.154	0.898035		44.4011	304.721	-2.77882	260.32	0.900797
KO:K01356	lexA; repressor LexA [EC:3.4.21.88]	198.284	185.419	0.0967798	12.8651	0.343991		198.284	25.4004	2.96465	172.884	0.89723		185.419	25.4004	2.86787	160.018	0.901688			KO:K07735	algH; putative transcriptional regulator	16.6347	6.981	1.25269	9.65374	0.707012		16.6347	0.0187795	9.79083	16.616	0.963255		6.981	0.0187795	8.53813	6.96222	0.803623
KO:K01358	clpP, CLPP; ATP-dependent Clp protease, protease subunit [EC:3.4.21.92]	341.334	300.907	0.181869	40.4275	0.4071		341.334	119.224	1.51751	222.111	0.858238		300.907	119.224	1.33565	181.683	0.86068			KO:K07736	carD; CarD family transcriptional regulator	22.7607	15.6398	0.54132	7.12086	0.540076		22.7607	0.0187795	10.2432	22.7419	0.98411		15.6398	0.0187795	9.70185	15.621	0.951864
KO:K01361	E3.4.21.96; lactocepin [EC:3.4.21.96]	0.579674	1.21066	-1.06249	0.630991	0.2862		0.579674	0.0187795	4.94801	0.560894	0.348547		1.21066	0.0187795	6.0105	1.19189	0.482345			KO:K07742	ylxR; uncharacterized protein	142.021	100.806	0.49453	41.2156	0.606769		142.021	13.5828	3.38625	128.438	0.897962		100.806	13.5828	2.89172	87.2229	0.901618
KO:K01364	speB; streptopain [EC:3.4.22.10]	0.0284763	0.215115	-2.91728	0.186639	0.2862		NA	NA	NA	NA	NA		0.215115	0.0187795	3.51788	0.196336	0.308921			KO:K07744	K07744; transcriptional regulator	0.890238	4.13533	-2.21574	3.24509	0.56643		0.890238	64.1962	-6.17215	63.306	0.967531		4.13533	64.1962	-3.95641	60.0609	0.902263
KO:K01365	CTSL; cathepsin L [EC:3.4.22.15]	0.190678	0.0284763	2.7433	0.162201	0.2862		0.190678	0.0187795	3.34391	0.171898	0.348547		NA	NA	NA	NA	NA			KO:K07745	K07745; transcriptional regulator	1.32285	42.2717	-4.99797	40.9489	0.864599		1.32285	319.891	-7.91778	318.568	0.99747		42.2717	319.891	-2.91982	277.619	0.9017
KO:K01372	BLMH, pepC; bleomycin hydrolase [EC:3.4.22.40]	3.15639	1.37444	1.19943	1.78195	0.404723		3.15639	0.0187795	7.39298	3.13761	0.695944		1.37444	0.0187795	6.19355	1.35567	0.482345			KO:K07748	E1.1.1.170, NSDHL, ERG26; sterol-4alpha-carboxylate 3-dehydrogenase (decarboxylating) [EC:1.1.1.170]	20.3704	0.809328	4.6536	19.5611	0.845082		20.3704	0.0187795	10.0831	20.3516	0.979615		0.809328	0.0187795	5.4295	0.790549	0.308921
KO:K01373	CTSF; cathepsin F [EC:3.4.22.41]	0.0922229	0.0284763	1.69536	0.0637466	0.2862		0.0922229	0.0187795	2.29597	0.0734434	0.348547		NA	NA	NA	NA	NA			KO:K07769	nblS; two-component system, OmpR family, sensor histidine kinase NblS [EC:2.7.13.3]	94.4307	0.0284763	11.6953	94.4022	1		94.4307	0.0187795	12.2959	94.4119	0.999937		NA	NA	NA	NA	NA
KO:K01387	colA; microbial collagenase [EC:3.4.24.3]	3.5596	8.66257	-1.28308	5.10296	0.616186		3.5596	0.0187795	7.56642	3.54082	0.695944		8.66257	0.0187795	8.84949	8.64379	0.858335			KO:K07790	pagO; putative membrane protein PagO	3.28579	11.2818	-1.77968	7.99597	0.725029		3.28579	0.0187795	7.45094	3.26701	0.695944		11.2818	0.0187795	9.23062	11.263	0.912298
KO:K01392	THOP1; thimet oligopeptidase [EC:3.4.24.15]	1.88991	0.0284763	6.05242	1.86144	0.494595		1.88991	0.0187795	6.65302	1.87113	0.524096		NA	NA	NA	NA	NA			KO:K07794	tctB; putative tricarboxylic transport membrane protein	13.5105	11.6593	0.212596	1.85117	0.332148		13.5105	0.0187795	9.49071	13.4917	0.942578		11.6593	0.0187795	9.27811	11.6406	0.912298
KO:K01393	NLN; neurolysin [EC:3.4.24.16]	0.264718	0.0284763	3.21662	0.236242	0.2862		0.264718	0.0187795	3.81723	0.245939	0.348547		NA	NA	NA	NA	NA			KO:K07795	tctC; putative tricarboxylic transport membrane protein	21.5378	16.4158	0.391786	5.122	0.467608		21.5378	0.0187795	10.1635	21.519	0.982218		16.4158	0.0187795	9.77171	16.397	0.958511
KO:K01406	prtC; serralysin [EC:3.4.24.40]	13.4245	1.18091	3.5069	12.2436	0.803214		13.4245	0.0187795	9.48149	13.4057	0.942578		1.18091	0.0187795	5.97459	1.16213	0.482345			KO:K07812	torZ; trimethylamine-N-oxide reductase (cytochrome c) [EC:1.7.2.3]	0.974613	13.2234	-3.76212	12.2488	0.803253		0.974613	0.14623	2.73659	0.828383	0.348547		13.2234	0.14623	6.49871	13.0772	0.901512
KO:K01409	KAE1, tsaD, QRI7; N6-L-threonylcarbamoyladenine synthase [EC:2.3.1.234]	289.812	383.24	-0.403132	93.4283	0.554295		289.812	466.782	-0.687635	176.971	0.749425		383.24	466.782	-0.284502	83.5425	0.548875			KO:K07814	K07814; putative two-component system response regulator	149.956	41.3674	1.85798	108.589	0.844186		149.956	0.0187795	12.9631	149.937	1		41.3674	0.0187795	11.1051	41.3486	0.998159
KO:K01411	NRD1; nardilysin [EC:3.4.24.61]	0.0284763	0.377715	-3.72946	0.349238	0.2862		NA	NA	NA	NA	NA		0.377715	0.0187795	4.33007	0.358935	0.308921			KO:K07978	plmA; GntR family transcriptional regulator	39.3965	11.6054	1.76327	27.7911	0.835275		39.3965	0.0187795	11.0347	39.3777	0.99792		11.6054	0.0187795	9.27142	11.5866	0.912298
KO:K01414	prlC; oligopeptidase A [EC:3.4.24.70]	3.73069	0.607242	2.6191	3.12345	0.56643		3.73069	0.0187795	7.63414	3.71191	0.695944		0.607242	0.0187795	5.01504	0.588463	0.308921			KO:K07979	ytrA; GntR family transcriptional regulator	12.168	1.69654	2.84242	10.4714	0.779753		12.168	0.0187795	9.33971	12.1492	0.93317		1.69654	0.0187795	6.49729	1.67776	0.482345
KO:K01415	ECE; endothelin-converting enzyme [EC:3.4.24.71]	0.964834	0.0284763	5.08245	0.936358	0.2862		0.964834	0.0187795	5.68305	0.946055	0.348547		NA	NA	NA	NA	NA			KO:K07999	MMP20; matrix metalloproteinase-20 (enamelysin) [EC:3.4.24.-]	0.0284763	11.7646	-8.69047	11.7361	0.927269		NA	NA	NA	NA	NA		11.7646	0.0187795	9.29108	11.7458	0.912298
KO:K01417	MEP; extracellular elastinolytic metalloproteinase [EC:3.4.24.-]	0.168172	0.0284763	2.56211	0.139696	0.2862		0.168172	0.0187795	3.16271	0.149393	0.348547		NA	NA	NA	NA	NA			KO:K08068	siaA, neuC1; UDP-N-acetylglucosamine 2-epimerase (hydrolysing) [EC:3.2.1.183]	61.1587	21.6088	1.50094	39.5499	0.81606		61.1587	0.0187795	11.6692	61.14	0.999665		21.6088	0.0187795	10.1682	21.59	0.978781
KO:K01419	hslV, clpQ; ATP-dependent HslUV protease, peptidase subunit HslV [EC:3.4.25.2]	121.343	167.569	-0.465673	46.2268	0.596075		121.343	81.5949	0.572537	39.7478	0.699833		167.569	81.5949	1.03821	85.9746	0.839859			KO:K08093	hxlA; 3-hexulose-6-phosphate synthase [EC:4.1.2.43]	1.83814	4.97905	-1.43762	3.14091	0.542257		1.83814	76.9959	-5.38846	75.1577	0.897867		4.97905	76.9959	-3.95084	72.0168	0.902521
KO:K01420	fnr; CRP/FNR family transcriptional regulator, anaerobic regulatory protein	256.63	384.778	-0.584339	128.149	0.663868		256.63	127.504	1.00915	129.126	0.833483		384.778	127.504	1.59349	257.274	0.882016			KO:K08094	hxlB; 6-phospho-3-hexuloisomerase [EC:5.3.1.27]	23.2296	51.4145	-1.14621	28.1849	0.788469		23.2296	462.847	-4.3165	439.618	0.898035		51.4145	462.847	-3.17029	411.433	0.902427
KO:K01421	yhgE; putative membrane protein	0.970307	0.63846	0.603846	0.331847	0.2862		0.970307	0.0187795	5.69121	0.951527	0.348547		0.63846	0.0187795	5.08737	0.61968	0.308921			KO:K08153	blt; MFS transporter, DHA1 family, multidrug resistance protein	59.7729	62.9407	-0.0745031	3.16786	0.319069		59.7729	4.51326	3.72725	55.2596	0.897585		62.9407	4.51326	3.80175	58.4275	0.902192
KO:K01424	E3.5.1.1, ansA, ansB; L-asparaginase [EC:3.5.1.1]	110.656	80.4961	0.459088	30.1597	0.591556		110.656	0.0187795	12.5246	110.637	0.999979		80.4961	0.0187795	12.0655	80.4773	0.999871			KO:K08162	mdtH; MFS transporter, DHA1 family, multidrug resistance protein	31.0806	0.0284763	10.092	31.0522	0.996212		31.0806	0.0187795	10.6926	31.0619	0.994982		NA	NA	NA	NA	NA
KO:K01425	glsA, GLS; glutaminase [EC:3.5.1.2]	0.0284763	0.300648	-3.40024	0.272172	0.2862		NA	NA	NA	NA	NA		0.300648	0.0187795	4.00085	0.281869	0.308921			KO:K08172	shiA; MFS transporter, MHS family, shikimate and dehydroshikimate transport protein	NA	NA	NA	NA	NA		0.0187795	13.9739	-9.53936	13.9551	0.942578		0.0187795	13.9739	-9.53936	13.9551	0.935135
KO:K01426	E3.5.1.4, amiE; amidase [EC:3.5.1.4]	92.8569	52.8673	0.812633	39.9895	0.716985		92.8569	16.6003	2.4838	76.2566	0.893613		52.8673	16.6003	1.67117	36.267	0.878851			KO:K08177	oxlT; MFS transporter, OFA family, oxalate/formate antiporter	22.926	22.7828	0.00903508	0.143128	0.2862		22.926	0.0187795	10.2536	22.9072	0.98411		22.7828	0.0187795	10.2446	22.7641	0.981489
KO:K01427	URE; urease [EC:3.5.1.5]	2.16013	4.22354	-0.96733	2.0634	0.442598		2.16013	0.0187795	6.84582	2.14136	0.624409		4.22354	0.0187795	7.81315	4.20476	0.721208			KO:K08191	exuT; MFS transporter, ACS family, hexuronate transporter	16.8902	6.78556	1.31565	10.1046	0.730093		16.8902	0.0187795	9.81281	16.8714	0.963255		6.78556	0.0187795	8.49717	6.76679	0.803623
KO:K01428	ureC; urease subunit alpha [EC:3.5.1.5]	47.4903	5.07982	3.22478	42.4105	0.86455		47.4903	0.0187795	11.3043	47.4715	0.999195		5.07982	0.0187795	8.07948	5.06104	0.766729			KO:K08217	mef; MFS transporter, DHA3 family, macrolide efflux protein	37.6981	91.2085	-1.27468	53.5104	0.802503		37.6981	12.7003	1.56963	24.9978	0.847564		91.2085	12.7003	2.8443	78.5082	0.901524
KO:K01429	ureB; urease subunit beta [EC:3.5.1.5]	12.0191	4.85606	1.30747	7.16302	0.670413		12.0191	0.0187795	9.32195	12.0003	0.93317		4.85606	0.0187795	8.01449	4.83728	0.721208			KO:K08218	ampG; MFS transporter, PAT family, beta-lactamase induction signal transducer AmpG	14.0719	14.0122	0.00613272	0.0596908	0.2862		14.0719	0.0187795	9.54944	14.0531	0.950951		14.0122	0.0187795	9.54331	13.9934	0.935135
KO:K01430	ureA; urease subunit gamma [EC:3.5.1.5]	13.3696	4.99368	1.42078	8.37594	0.701412		13.3696	0.0187795	9.47559	13.3508	0.942578		4.99368	0.0187795	8.0548	4.9749	0.721208			KO:K08223	fsr; MFS transporter, FSR family, fosmidomycin resistance protein	68.283	101.134	-0.566672	32.8512	0.62874		68.283	7.22689	3.24008	61.0561	0.897533		101.134	7.22689	3.80675	93.9073	0.902685
KO:K01432	AFMID; arylformamidase [EC:3.5.1.9]	6.30526	0.269303	4.54926	6.03595	0.696046		6.30526	0.0187795	8.39125	6.28648	0.826406		0.269303	0.0187795	3.842	0.250523	0.308921			KO:K08224	ynfM; MFS transporter, YNFM family, putative membrane transport protein	24.212	3.5767	2.75902	20.6353	0.845939		24.212	0.0187795	10.3324	24.1932	0.98779		3.5767	0.0187795	7.57333	3.55792	0.663283
KO:K01433	purU; formyltetrahydrofolate deformylase [EC:3.5.1.10]	77.5712	33.8154	1.19784	43.7558	0.796192		77.5712	1.89008	5.359	75.6812	0.897867		33.8154	1.89008	4.16116	31.9253	0.896706			KO:K08226	pucC; MFS transporter, BCD family, chlorophyll transporter	198.27	0.114876	10.7532	198.155	1		198.27	0.0187795	13.366	198.252	1		0.114876	0.0187795	2.61285	0.0960964	0.308921
KO:K01434	E3.5.1.11; penicillin amidase [EC:3.5.1.11]	270.642	247.729	0.127622	22.9127	0.368387		270.642	327.335	-0.274386	56.6938	0.556293		247.729	327.335	-0.402008	79.6066	0.624115			KO:K08234	yaeR; glyoxylase I family protein	27.4588	3.4264	3.0025	24.0324	0.855639		27.4588	0.0187795	10.5139	27.44	0.991846		3.4264	0.0187795	7.51139	3.40762	0.663283
KO:K01436	K01436; amidohydrolase [EC:3.5.1.-]	218.048	54.2739	2.00632	163.775	0.854899		218.048	0.0187795	13.5032	218.03	1		54.2739	0.0187795	11.4969	54.2551	0.999332			KO:K08252	E2.7.10.1; receptor protein-tyrosine kinase [EC:2.7.10.1]	27.8831	0.213929	7.02611	27.6692	0.986628		27.8831	0.0187795	10.536	27.8643	0.991846		0.213929	0.0187795	3.5099	0.19515	0.308921
KO:K01438	argE; acetylornithine deacetylase [EC:3.5.1.16]	77.4714	263.003	-1.76335	185.532	0.841683		77.4714	564.483	-2.8652	487.012	0.897219		263.003	564.483	-1.10185	301.48	0.842673			KO:K08253	E2.7.10.2; non-specific protein-tyrosine kinase [EC:2.7.10.2]	89.0014	71.5212	0.315456	17.4801	0.512437		89.0014	6.62164	3.74857	82.3797	0.897888		71.5212	6.62164	3.43311	64.8996	0.902169
KO:K01439	dapE; succinyl-diaminopimelate desuccinylase [EC:3.5.1.18]	223.227	245.236	-0.135656	22.0084	0.376675		223.227	268.428	-0.266019	45.2002	0.556105		245.236	268.428	-0.130363	23.1917	0.414994			KO:K08259	lytM; lysostaphin [EC:3.4.24.75]	3.8394	11.6925	-1.60664	7.85315	0.702785		3.8394	0.0187795	7.67558	3.82062	0.695944		11.6925	0.0187795	9.28222	11.6738	0.912298
KO:K01443	nagA, AMDHD2; N-acetylglucosamine-6-phosphate deacetylase [EC:3.5.1.25]	124.461	117.182	0.0869486	7.27948	0.336511		124.461	32.8185	1.92311	91.6426	0.879438		117.182	32.8185	1.83616	84.3631	0.885627			KO:K08264	hdrD; heterodisulfide reductase subunit D [EC:1.8.98.1]	38.1305	68.0992	-0.836693	29.9687	0.716439		38.1305	0.0187795	10.9876	38.1117	0.997669		68.0992	0.0187795	11.8243	68.0804	0.999672
KO:K01444	AGA, aspG; N4-(beta-N-acetylglucosaminyl)-L-asparaginase [EC:3.5.1.26]	57.5861	65.1881	-0.178889	7.60204	0.398529		57.5861	0.298923	7.5898	57.2871	0.99378		65.1881	0.298923	7.76869	64.8892	0.997222			KO:K08281	pncA; nicotinamidase/pyrazinamidase [EC:3.5.1.19 3.5.1.-]	80.8593	146.372	-0.856153	65.5126	0.724571		80.8593	7.89816	3.35583	72.9611	0.897752		146.372	7.89816	4.21198	138.474	0.902767
KO:K01446	PGRP; peptidoglycan recognition protein	3.80203	0.0284763	7.06086	3.77355	0.693553		3.80203	0.0187795	7.66147	3.78325	0.695944		NA	NA	NA	NA	NA			KO:K08295	abmG; 2-aminobenzoate-CoA ligase [EC:6.2.1.32]	9.80009	26.7647	-1.44946	16.9646	0.782577		9.80009	0.0187795	9.02749	9.78131	0.893038		26.7647	0.0187795	10.477	26.7459	0.989086
KO:K01447	E3.5.1.28A, cwlA, xlyA, xlyB; N-acetylmuramoyl-L-alanine amidase [EC:3.5.1.28]	15.202	7.54154	1.01133	7.66049	0.661765		15.202	1.15598	3.71708	14.0461	0.848986		7.54154	1.15598	2.70575	6.38556	0.705862			KO:K08300	rne; ribonuclease E [EC:3.1.26.12]	49.9728	12.1895	2.0355	37.7832	0.853107		49.9728	0.109377	8.83568	49.8634	0.999185		12.1895	0.109377	6.80019	12.0802	0.912532
KO:K01448	E3.5.1.28B, amiA, amiB, amiC; N-acetylmuramoyl-L-alanine amidase [EC:3.5.1.28]	226.291	234.552	-0.0517258	8.26054	0.30745		226.291	147.842	0.614128	78.4495	0.732114		234.552	147.842	0.665853	86.71	0.745018			KO:K08304	mltA; membrane-bound lytic murein transglycosylase A [EC:4.2.2.-]	17.8845	1.15145	3.95719	16.7331	0.832246		17.8845	0.0187795	9.89534	17.8658	0.968085		1.15145	0.0187795	5.93815	1.13267	0.482345
KO:K01449	E3.5.1.28C, cwlJ, sleB; N-acetylmuramoyl-L-alanine amidase [EC:3.5.1.28]	1.08947	5.2333	-2.26409	4.14383	0.614794		1.08947	0.0187795	5.85833	1.07069	0.524096		5.2333	0.0187795	8.12242	5.21452	0.766729			KO:K08349	fdnH; formate dehydrogenase-N, beta subunit	1.02118	17.0001	-4.05724	15.9789	0.826656		1.02118	0.0187795	5.76493	1.0024	0.524096		17.0001	0.0187795	9.82217	16.9813	0.958511
KO:K01451	hipO; hippurate hydrolase [EC:3.5.1.32]	23.3975	42.2288	-0.851873	18.8313	0.702464		23.3975	0.0187795	10.283	23.3787	0.986159		42.2288	0.0187795	11.1349	42.2101	0.998347			KO:K08355	aoxA; arsenite oxidase small subunit [EC:1.20.2.1 1.20.9.1]	17.7257	11.8892	0.576191	5.83651	0.533765		17.7257	98.5688	-2.47529	80.8431	0.893623		11.8892	98.5688	-3.05148	86.6796	0.902087
KO:K01452	E3.5.1.41; chitin deacetylase [EC:3.5.1.41]	25.7273	4.62314	2.47636	21.1042	0.845501		25.7273	0.0187795	10.4199	25.7085	0.989233		4.62314	0.0187795	7.94357	4.60436	0.721208			KO:K08356	aoxB; arsenite oxidase large subunit [EC:1.20.2.1 1.20.9.1]	17.5629	8.10128	1.11631	9.46162	0.699357		17.5629	60.0277	-1.7731	42.4648	0.875361		8.10128	60.0277	-2.88941	51.9265	0.900903
KO:K01453	nylB; 6-aminohexanoate-oligomer exohydrolase [EC:3.5.1.46]	2.14258	0.241509	3.1492	1.90108	0.404723		2.14258	0.0187795	6.83405	2.1238	0.624409		0.241509	0.0187795	3.68485	0.22273	0.308921			KO:K08364	merP; periplasmic mercuric ion binding protein	21.2598	14.31	0.571107	6.94984	0.524883		21.2598	0.128795	7.36691	21.131	0.976427		14.31	0.128795	6.7958	14.1812	0.931653
KO:K01455	E3.5.1.49; formamidase [EC:3.5.1.49]	8.67868	38.3166	-2.14242	29.6379	0.85039		8.67868	77.501	-3.15867	68.8224	0.897366		38.3166	77.501	-1.01624	39.1844	0.837491			KO:K08372	pepD; putative serine protease PepD [EC:3.4.21.-]	18.4451	18.5492	-0.00811874	0.104092	0.2862		18.4451	0.0187795	9.93986	18.4263	0.972413		18.5492	0.0187795	9.94798	18.5304	0.968382
KO:K01456	E3.5.1.52, NGLY1, PNG1; peptide-N4-(N-acetyl-beta-glucosaminyl)asparagine amidase [EC:3.5.1.52]	0.115174	0.0284763	2.01598	0.0866973	0.2862		0.115174	0.0187795	2.61658	0.0963942	0.348547		NA	NA	NA	NA	NA			KO:K08479	sasA; two-component system, OmpR family, clock-associated histidine kinase SasA [EC:2.7.13.3]	32.4036	1.05132	4.94588	31.3523	0.862125		32.4036	0.0187795	10.7528	32.3848	0.995463		1.05132	0.0187795	5.8069	1.03254	0.482345
KO:K01457	atzF; allophanate hydrolase [EC:3.5.1.54]	14.9466	0.0284763	9.03584	14.9181	0.953935		14.9466	0.0187795	9.63644	14.9278	0.950951		NA	NA	NA	NA	NA			KO:K08480	kaiA; circadian clock protein KaiA	36.75	0.0284763	10.3338	36.7215	0.997984		36.75	0.0187795	10.9344	36.7312	0.997198		NA	NA	NA	NA	NA
KO:K01462	PDF, def; peptide deformylase [EC:3.5.1.88]	264.916	270.582	-0.030529	5.66566	0.29552		264.916	58.9811	2.16721	205.935	0.888919		270.582	58.9811	2.19774	211.601	0.894936			KO:K08481	kaiB; circadian clock protein KaiB	71.4889	0.0284763	11.2937	71.4604	0.999951		71.4889	0.0187795	11.8943	71.4701	0.999791		NA	NA	NA	NA	NA
KO:K01464	DPYS, dht, hydA; dihydropyrimidinase [EC:3.5.2.2]	65.3114	130.169	-0.994978	64.8575	0.73395		65.3114	133.154	-1.02769	67.8428	0.833389		130.169	133.154	-0.0327133	2.98532	0.322649			KO:K08602	pepF, pepB; oligoendopeptidase F [EC:3.4.24.-]	187.51	114.178	0.715687	73.3324	0.691595		187.51	0.118297	10.6303	187.392	1		114.178	0.118297	9.91466	114.06	0.999977
KO:K01465	URA4, pyrC; dihydroorotase [EC:3.5.2.3]	371.052	358.138	0.0511021	12.9131	0.307489		371.052	676.586	-0.866654	305.535	0.784508		358.138	676.586	-0.917756	318.448	0.792696			KO:K08637	CPA4; carboxypeptidase A4 [EC:3.4.17.-]	10.331	0.0284763	8.503	10.3025	0.914784		10.331	0.0187795	9.1036	10.3122	0.908708		NA	NA	NA	NA	NA
KO:K01466	allB; allantoinase [EC:3.5.2.5]	20.74	11.706	0.825169	9.03403	0.636852		20.74	235.527	-3.5054	214.787	0.897993		11.706	235.527	-4.33057	223.821	0.902767			KO:K08641	vanX; zinc D-Ala-D-Ala dipeptidase [EC:3.4.13.22]	36.3394	19.4962	0.898342	16.8432	0.699698		36.3394	0.0187795	10.9182	36.3207	0.997198		19.4962	0.0187795	10.0198	19.4774	0.972438
KO:K01467	ampC; beta-lactamase class C [EC:3.5.2.6]	55.2899	7.93095	2.80145	47.359	0.863041		55.2899	0.0187795	11.5236	55.2712	0.99955		7.93095	0.0187795	8.72219	7.91217	0.833798			KO:K08680	menH; 2-succinyl-6-hydroxy-2,4-cyclohexadiene-1-carboxylate synthase [EC:4.2.99.20]	43.0771	8.8916	2.27641	34.1855	0.853292		43.0771	0.0187795	11.1635	43.0584	0.998766		8.8916	0.0187795	8.88714	8.87282	0.858335
KO:K01468	hutI, AMDHD1; imidazolonepropionase [EC:3.5.2.7]	51.8402	175.76	-1.76146	123.92	0.841683		51.8402	156.013	-1.58952	104.173	0.875413		175.76	156.013	0.171939	19.7469	0.452591			KO:K08691	mcl; malyl-CoA/(S)-citramalyl-CoA lyase [EC:4.1.3.24 4.1.3.25]	29.142	0.631595	5.52796	28.5104	0.950224		29.142	0.0187795	10.5997	29.1232	0.993749		0.631595	0.0187795	5.07177	0.612816	0.308921
KO:K01469	OPLAH, OXP1, oplAH; 5-oxoprolinase (ATP-hydrolysing) [EC:3.5.2.9]	15.8874	13.7762	0.2057	2.11115	0.360129		15.8874	0.221882	6.16195	15.6655	0.925172		13.7762	0.221882	5.95625	13.5544	0.901512			KO:K08693	yfkN; 2',3'-cyclic-nucleotide 2'-phosphodiesterase / 3'-nucleotidase / 5'-nucleotidase [EC:3.1.4.16 3.1.3.6 3.1.3.5]	26.2318	8.28588	1.66259	17.9459	0.81193		26.2318	0.0187795	10.4479	26.213	0.99056		8.28588	0.0187795	8.78535	8.2671	0.858335
KO:K01470	E3.5.2.10; creatinine amidohydrolase [EC:3.5.2.10]	84.6385	249.131	-1.55751	164.492	0.817764		84.6385	275.313	-1.70168	190.674	0.875925		249.131	275.313	-0.144169	26.1822	0.4249			KO:K08696	ccmK; carbon dioxide concentrating mechanism protein CcmK	89.1176	0.0284763	11.6117	89.0891	0.999981		89.1176	0.0187795	12.2123	89.0988	0.999906		NA	NA	NA	NA	NA
KO:K01473	hyuA; N-methylhydantoinase A [EC:3.5.2.14]	204.152	195.224	0.0645136	8.92802	0.314219		204.152	298.884	-0.549943	94.7321	0.698746		195.224	298.884	-0.614457	103.66	0.732626			KO:K08697	ccmL; carbon dioxide concentrating mechanism protein CcmL	41.667	7.13132	2.54666	34.5356	0.858142		41.667	0.0187795	11.1155	41.6482	0.998401		7.13132	0.0187795	8.56887	7.11254	0.833798
KO:K01474	hyuB; N-methylhydantoinase B [EC:3.5.2.14]	195.431	184.711	0.0813919	10.7203	0.329129		195.431	341.242	-0.804135	145.811	0.77096		184.711	341.242	-0.885527	156.531	0.790281			KO:K08698	ccmM; carbon dioxide concentrating mechanism protein CcmM	53.8137	4.47295	3.58868	49.3408	0.865358		53.8137	0.0187795	11.4846	53.795	0.999477		4.47295	0.0187795	7.89593	4.45417	0.721208
KO:K01476	E3.5.3.1, rocF, arg; arginase [EC:3.5.3.1]	106.23	56.4908	0.911102	49.7391	0.730405		106.23	22.3882	2.24638	83.8418	0.888877		56.4908	22.3882	1.33528	34.1027	0.856506			KO:K08699	ccmN; carbon dioxide concentrating mechanism protein CcmN	34.9817	0.0284763	10.2626	34.9533	0.997302		34.9817	0.0187795	10.8632	34.963	0.996477		NA	NA	NA	NA	NA
KO:K01477	alc, ALLC; allantoicase [EC:3.5.3.4]	0.0284763	0.192503	-2.75705	0.164027	0.2862		NA	NA	NA	NA	NA		0.192503	0.0187795	3.35765	0.173724	0.308921			KO:K08700	ccmO; carbon dioxide concentrating mechanism protein CcmO	48.3484	0.0284763	10.7295	48.3199	0.999396		48.3484	0.0187795	11.3301	48.3296	0.999247		NA	NA	NA	NA	NA
KO:K01478	arcA; arginine deiminase [EC:3.5.3.6]	15.3846	6.98071	1.14004	8.40393	0.68397		15.3846	55.5506	-1.85231	40.166	0.87718		6.98071	55.5506	-2.99236	48.5699	0.90068			KO:K08779	CPA1; carboxypeptidase A1 [EC:3.4.17.1]	17.6113	13.505	0.383006	4.10628	0.447341		17.6113	0.0187795	9.87313	17.5925	0.968085		13.505	0.0187795	9.49012	13.4862	0.935135
KO:K01479	hutG; formiminoglutamase [EC:3.5.3.8]	20.4006	47.5316	-1.22027	27.131	0.794926		20.4006	12.1776	0.744386	8.22304	0.66313		47.5316	12.1776	1.96466	35.354	0.882579			KO:K08818	CDC2L; cell division cycle 2-like [EC:2.7.11.22]	NA	NA	NA	NA	NA		0.0187795	14.6042	-9.60302	14.5855	0.950951		0.0187795	14.6042	-9.60302	14.5855	0.944033
KO:K01480	speB; agmatinase [EC:3.5.3.11]	157.175	321.685	-1.03328	164.51	0.787729		157.175	429.065	-1.44882	271.89	0.856795		321.685	429.065	-0.415546	107.38	0.647386			KO:K08902	psb27; photosystem II Psb27 protein	33.117	0.0284763	10.1836	33.0886	0.996932		33.117	0.0187795	10.7842	33.0983	0.995902		NA	NA	NA	NA	NA
KO:K01482	DDAH, ddaH; dimethylargininase [EC:3.5.3.18]	1.10577	1.62909	-0.559018	0.523324	0.2862		1.10577	9.75837	-3.14159	8.6526	0.772768		1.62909	9.75837	-2.58257	8.12927	0.75959			KO:K08903	psb28; photosystem II 13kDa protein	33.5512	0.0284763	10.2024	33.5227	0.996932		33.5512	0.0187795	10.803	33.5324	0.995902		NA	NA	NA	NA	NA
KO:K01483	allA; ureidoglycolate lyase [EC:4.3.2.3]	8.92441	3.9926	1.16043	4.9318	0.576938		8.92441	0.71489	3.64196	8.20952	0.773019		3.9926	0.71489	2.48154	3.27771	0.571606			KO:K08906	petJ; cytochrome c6	31.3489	0.0284763	10.1044	31.3204	0.996212		31.3489	0.0187795	10.705	31.3301	0.994982		NA	NA	NA	NA	NA
KO:K01485	codA; cytosine deaminase [EC:3.5.4.1]	63.3076	31.8388	0.991593	31.4688	0.730503		63.3076	8.97474	2.81844	54.3329	0.896738		31.8388	8.97474	1.82684	22.864	0.867245			KO:K08927	pufB; light-harvesting complex 1 beta chain	40.821	0.0284763	10.4853	40.7925	0.998685		40.821	0.0187795	11.0859	40.8022	0.99815		NA	NA	NA	NA	NA
KO:K01486	ade; adenine deaminase [EC:3.5.4.2]	72.8489	163.858	-1.16947	91.009	0.796231		72.8489	191.762	-1.39634	118.913	0.85484		163.858	191.762	-0.226873	27.9042	0.508722			KO:K08929	pufM; photosynthetic reaction center M subunit	79.396	0.0284763	11.4451	79.3676	0.999951		79.396	0.0187795	12.0457	79.3773	0.999843		NA	NA	NA	NA	NA
KO:K01487	E3.5.4.3, guaD; guanine deaminase [EC:3.5.4.3]	35.3624	21.7533	0.700981	13.6091	0.648042		35.3624	60.4523	-0.773582	25.0899	0.757621		21.7533	60.4523	-1.47456	38.699	0.862614			KO:K08952	csmI; chlorosome envelope protein I	11.874	0.0284763	8.70383	11.8455	0.927269		11.874	0.0187795	9.30444	11.8552	0.921984		NA	NA	NA	NA	NA
KO:K01488	add, ADA; adenosine deaminase [EC:3.5.4.4]	93.366	82.6836	0.175296	10.6824	0.404139		93.366	12.1542	2.94144	81.2118	0.897073		82.6836	12.1542	2.76614	70.5293	0.900516			KO:K08974	K08974; putative membrane protein	40.961	9.08199	2.17317	31.879	0.852113		40.961	0.0187795	11.0909	40.9422	0.99815		9.08199	0.0187795	8.91771	9.06321	0.879086
KO:K01489	cdd, CDA; cytidine deaminase [EC:3.5.4.5]	141.078	198.927	-0.495741	57.8484	0.610284		141.078	297.979	-1.07872	156.901	0.835051		198.927	297.979	-0.582976	99.0527	0.730012			KO:K08980	K08980; putative membrane protein	4.2615	13.8355	-1.69894	9.57399	0.742988		4.2615	172.862	-5.34212	168.6	0.898035		13.8355	172.862	-3.64317	159.026	0.902708
KO:K01491	folD; methylenetetrahydrofolate dehydrogenase (NADP+) / methenyltetrahydrofolate cyclohydrolase [EC:1.5.1.5 3.5.4.9]	237.989	294.176	-0.305787	56.1874	0.500604		237.989	150.742	0.65881	87.2465	0.742735		294.176	150.742	0.964597	143.434	0.795029			KO:K08982	K08982; putative membrane protein	24.7319	21.0941	0.229534	3.6378	0.388459		24.7319	0.0187795	10.363	24.7132	0.98779		21.0941	0.0187795	10.1335	21.0754	0.978781
KO:K01492	purNH; phosphoribosylglycinamide/phosphoribosylaminoimidazolecarboxamide formyltransferase [EC:2.1.2.2 2.1.2.3]	0.066748	0.0284763	1.22896	0.0382717	0.2862		0.066748	0.0187795	1.82957	0.0479685	0.348547		NA	NA	NA	NA	NA			KO:K08994	yneE, BEST; ion channel-forming bestrophin family protein	79.8495	0.53306	7.22684	79.3165	0.997069		79.8495	0.0187795	12.0539	79.8308	0.999843		0.53306	0.0187795	4.82707	0.514281	0.308921
KO:K01493	comEB; dCMP deaminase [EC:3.5.4.12]	101.467	81.9965	0.307375	19.4704	0.497906		101.467	0.239745	8.72529	101.227	0.999843		81.9965	0.239745	8.41792	81.7568	0.999519			KO:K08998	K08998; uncharacterized protein	177.213	177.316	-0.000835089	0.102608	0.2862		177.213	17.7459	3.31993	159.467	0.897962		177.316	17.7459	3.32076	159.57	0.902579
KO:K01494	dcd; dCTP deaminase [EC:3.5.4.13]	186.765	276.138	-0.56416	89.3721	0.629558		186.765	460.058	-1.30059	273.293	0.846508		276.138	460.058	-0.73643	183.921	0.768054			KO:K09009	K09009; uncharacterized protein	14.0339	22.1508	-0.658441	8.11689	0.593446		14.0339	0.0187795	9.54555	14.0151	0.950951		22.1508	0.0187795	10.204	22.132	0.981489
KO:K01495	GCH1, folE; GTP cyclohydrolase IA [EC:3.5.4.16]	139.125	208.274	-0.582107	69.1497	0.663781		139.125	74.7111	0.896983	64.4135	0.786128		208.274	74.7111	1.47909	133.563	0.86517			KO:K09012	sufR; DeoR family transcriptional regulator, suf operon transcriptional repressor	47.8192	9.92142	2.26897	37.8978	0.854198		47.8192	0.0187795	11.3142	47.8005	0.999195		9.92142	0.0187795	9.04525	9.90264	0.879086
KO:K01496	hisI; phosphoribosyl-AMP cyclohydrolase [EC:3.5.4.19]	85.4167	157.687	-0.884478	72.2708	0.7276		85.4167	231.486	-1.43833	146.069	0.856774		157.687	231.486	-0.553856	73.7984	0.698148			KO:K09020	rutB; ureidoacrylate peracid hydrolase [EC:3.5.1.110]	4.76614	12.7888	-1.42398	8.02262	0.701412		4.76614	0.0187795	7.98752	4.74736	0.749843		12.7888	0.0187795	9.4115	12.77	0.924912
KO:K01497	ribA, RIB1; GTP cyclohydrolase II [EC:3.5.4.25]	13.4975	2.75185	2.29421	10.7456	0.77126		13.4975	23.1819	-0.780308	9.68442	0.679553		2.75185	23.1819	-3.07452	20.4301	0.877902			KO:K09116	K09116; uncharacterized protein	8.59029	55.1023	-2.68133	46.512	0.862924		8.59029	5.28384	0.701121	3.30645	0.529668		55.1023	5.28384	3.38245	49.8184	0.901665
KO:K01499	mch; methenyltetrahydromethanopterin cyclohydrolase [EC:3.5.4.27]	5.57259	15.4137	-1.4678	9.84116	0.720199		5.57259	0.167558	5.05561	5.40503	0.691668		15.4137	0.167558	6.52341	15.2462	0.918242			KO:K09126	K09126; uncharacterized protein	17.2934	41.9403	-1.27811	24.6469	0.793436		17.2934	0.285499	5.92059	17.0079	0.935898		41.9403	0.285499	7.19871	41.6548	0.985768
KO:K01501	E3.5.5.1; nitrilase [EC:3.5.5.1]	5.11763	12.4363	-1.281	7.31862	0.670413		5.11763	0.0187795	8.09018	5.09885	0.792714		12.4363	0.0187795	9.37118	12.4175	0.924912			KO:K09132	K09132; uncharacterized protein	28.827	50.4848	-0.80843	21.6578	0.705152		28.827	1.14346	4.65595	27.6835	0.889881		50.4848	1.14346	5.46438	49.3414	0.901852
KO:K01502	E3.5.5.7; aliphatic nitrilase [EC:3.5.5.7]	1.81102	14.2606	-2.97716	12.4496	0.80225		1.81102	0.299314	2.59707	1.51171	0.454317		14.2606	0.299314	5.57423	13.9613	0.837913			KO:K09138	K09138; uncharacterized protein	3.71359	17.3131	-2.22098	13.5995	0.802815		3.71359	0.138836	4.74136	3.57476	0.59977		17.3131	0.138836	6.96234	17.1743	0.951278
KO:K01505	E3.5.99.7; 1-aminocyclopropane-1-carboxylate deaminase [EC:3.5.99.7]	0.0284763	1.16307	-5.35204	1.1346	0.494595		NA	NA	NA	NA	NA		1.16307	0.0187795	5.95264	1.1443	0.482345			KO:K09150	K09150; uncharacterized protein	0.986856	8.9907	-3.18752	8.00384	0.746494		0.986856	118.332	-6.90579	117.345	0.986661		8.9907	118.332	-3.71826	109.341	0.902696
KO:K01507	ppa; inorganic pyrophosphatase [EC:3.6.1.1]	183.838	142.852	0.363912	40.9858	0.53807		183.838	95.5419	0.944226	88.2957	0.789421		142.852	95.5419	0.580314	47.3099	0.729086			KO:K09154	K09154; uncharacterized protein	10.7016	24.5308	-1.19676	13.8292	0.746104		10.7016	0.191949	5.80096	10.5097	0.876573		24.5308	0.191949	6.99773	24.3388	0.973411
KO:K01512	acyP; acylphosphatase [EC:3.6.1.7]	213.829	320.796	-0.585196	106.967	0.664034		213.829	596.272	-1.47951	382.443	0.857537		320.796	596.272	-0.894315	275.476	0.790281			KO:K09155	K09155; uncharacterized protein	29.5108	81.3845	-1.46351	51.8737	0.816352		29.5108	1.15652	4.67337	28.3542	0.890884		81.3845	1.15652	6.13689	80.228	0.966237
KO:K01513	ENPP1_3, CD203; ectonucleotide pyrophosphatase/phosphodiesterase family member 1/3 [EC:3.1.4.1 3.6.1.9]	5.50303	0.0284763	7.59432	5.47456	0.794595		5.50303	0.0187795	8.19493	5.48425	0.792714		NA	NA	NA	NA	NA			KO:K09164	K09164; uncharacterized protein	19.6319	23.5445	-0.26219	3.9126	0.401159		19.6319	0.0187795	10.0298	19.6131	0.976301		23.5445	0.0187795	10.292	23.5257	0.983763
KO:K01514	PRUNE, PPX1; exopolyphosphatase [EC:3.6.1.11]	0.163383	0.0284763	2.52042	0.134907	0.2862		0.163383	0.0187795	3.12103	0.144603	0.348547		NA	NA	NA	NA	NA			KO:K09165	K09165; uncharacterized protein	39.027	11.5722	1.75381	27.4548	0.835275		39.027	0.0187795	11.0211	39.0082	0.99792		11.5722	0.0187795	9.26729	11.5534	0.912298
KO:K01515	nudF; ADP-ribose pyrophosphatase [EC:3.6.1.13]	215.951	313.699	-0.538676	97.7478	0.624825		215.951	740.985	-1.77874	525.034	0.876793		313.699	740.985	-1.24006	427.286	0.851805			KO:K09166	K09166; uncharacterized protein	35.1041	8.51192	2.04408	26.5922	0.847624		35.1041	0.0187795	10.8683	35.0853	0.996843		8.51192	0.0187795	8.82418	8.49314	0.858335
KO:K01517	ADPRM; manganese-dependent ADP-ribose/CDP-alcohol diphosphatase [EC:3.6.1.13 3.6.1.16 3.6.1.53]	3.45937	0.0284763	6.9246	3.43089	0.693553		3.45937	0.0187795	7.52521	3.44059	0.695944		NA	NA	NA	NA	NA			KO:K09680	coaW; type II pantothenate kinase [EC:2.7.1.33]	12.8172	1.93293	2.72922	10.8843	0.77872		12.8172	0.0187795	9.41471	12.7984	0.93317		1.93293	0.0187795	6.68549	1.91415	0.482345
KO:K01518	NUDT2; bis(5'-nucleosidyl)-tetraphosphatase [EC:3.6.1.17]	10.8349	6.07352	0.83508	4.76137	0.527922		10.8349	0.0187795	9.17231	10.8161	0.908708		6.07352	0.0187795	8.33723	6.05474	0.803623			KO:K09694	nodJ; lipooligosaccharide transport system permease protein	22.6795	28.3836	-0.323671	5.70413	0.454441		22.6795	0.133845	7.40468	22.5456	0.978319		28.3836	0.133845	7.72835	28.2497	0.988886
KO:K01519	ITPA; inosine triphosphate pyrophosphatase [EC:3.6.1.-]	1.63852	0.0284763	5.84648	1.61004	0.494595		1.63852	0.0187795	6.44709	1.61974	0.524096		NA	NA	NA	NA	NA			KO:K09695	nodI; lipooligosaccharide transport system ATP-binding protein	28.6707	36.388	-0.343885	7.71728	0.480814		28.6707	0.0187795	10.5762	28.6519	0.99285		36.388	0.0187795	10.9201	36.3692	0.996753
KO:K01520	dut, DUT; dUTP pyrophosphatase [EC:3.6.1.23]	104.925	105.043	-0.00161312	0.117386	0.2862		104.925	123.704	-0.23753	18.7787	0.529563		105.043	123.704	-0.235917	18.6613	0.512837			KO:K09696	natB; sodium transport system permease protein	24.1756	13.0612	0.888267	11.1144	0.666167		24.1756	0.0187795	10.3302	24.1568	0.98779		13.0612	0.0187795	9.44191	13.0424	0.935135
KO:K01522	FHIT; bis(5'-adenosyl)-triphosphatase [EC:3.6.1.29]	0.0284763	1.68565	-5.8874	1.65717	0.494595		NA	NA	NA	NA	NA		1.68565	0.0187795	6.488	1.66687	0.482345			KO:K09697	natA; sodium transport system ATP-binding protein [EC:3.6.3.7]	14.3251	9.36561	0.613104	4.95952	0.507928		14.3251	0.0187795	9.57518	14.3064	0.950951		9.36561	0.0187795	8.96207	9.34683	0.879086
KO:K01523	hisE; phosphoribosyl-ATP pyrophosphohydrolase [EC:3.6.1.31]	7.68567	1.90032	2.01593	5.78535	0.655132		7.68567	3.80247	1.01523	3.8832	0.574242		1.90032	3.80247	-1.0007	1.90215	0.418746			KO:K09705	K09705; uncharacterized protein	17.8246	0.0284763	9.28989	17.7962	0.971445		17.8246	0.0187795	9.8905	17.8059	0.968085		NA	NA	NA	NA	NA
KO:K01524	ppx-gppA; exopolyphosphatase / guanosine-5'-triphosphate,3'-diphosphate pyrophosphatase [EC:3.6.1.11 3.6.1.40]	220.527	127.599	0.789332	92.9274	0.711346		220.527	62.3373	1.82279	158.19	0.878946		127.599	62.3373	1.03346	65.2622	0.83939			KO:K09709	meh; 3-methylfumaryl-CoA hydratase [EC:4.2.1.153]	29.3197	9.53469	1.62061	19.785	0.819468		29.3197	0.271939	6.75244	29.0477	0.98041		9.53469	0.271939	5.13183	9.26276	0.781887
KO:K01525	apaH; bis(5'-nucleosyl)-tetraphosphatase (symmetrical) [EC:3.6.1.41]	2.24724	0.245772	3.19276	2.00147	0.496611		2.24724	0.0187795	6.90285	2.22846	0.624409		0.245772	0.0187795	3.71009	0.226992	0.308921			KO:K09714	K09714; uncharacterized protein	0.360017	3.23409	-3.16722	2.87408	0.496611		0.360017	58.813	-7.35193	58.453	0.993801		3.23409	58.813	-4.1847	55.5789	0.90211
KO:K01531	mgtA, mgtB; Mg2+-importing ATPase [EC:3.6.3.2]	30.5069	39.2662	-0.36415	8.75924	0.498831		30.5069	0.663237	5.52347	29.8437	0.891783		39.2662	0.663237	5.88762	38.6029	0.96381			KO:K09729	K09729; uncharacterized protein	10.2046	32.6587	-1.67825	22.4541	0.827328		10.2046	0.23514	5.43956	9.96944	0.791146		32.6587	0.23514	7.11781	32.4235	0.982298
KO:K01533	copB; Cu2+-exporting ATPase [EC:3.6.3.4]	126.418	128.805	-0.0269972	2.38793	0.295101		126.418	171.92	-0.44354	45.5024	0.658436		128.805	171.92	-0.416543	43.1145	0.646471			KO:K09740	K09740; uncharacterized protein	9.62468	36.0766	-1.90625	26.4519	0.837593		9.62468	0.104725	6.52207	9.51996	0.860924		36.0766	0.104725	8.42832	35.9719	0.995909
KO:K01534	zntA; Cd2+/Zn2+-exporting ATPase [EC:3.6.3.3 3.6.3.5]	320.222	138.771	1.20636	181.451	0.797332		320.222	109.447	1.54885	210.776	0.85829		138.771	109.447	0.342481	29.3247	0.589332			KO:K09741	pcc1; KEOPS complex subunit Pcc1	2.31561	33.0693	-3.83603	30.7537	0.861599		2.31561	134.161	-5.85643	131.845	0.967813		33.0693	134.161	-2.0204	101.091	0.894068
KO:K01535	PMA1, PMA2; H+-transporting ATPase [EC:3.6.3.6]	0.223619	3.45849	-3.95103	3.23487	0.56643		0.223619	0.0187795	3.57381	0.20484	0.348547		3.45849	0.0187795	7.52484	3.43971	0.663283			KO:K09749	K09749; uncharacterized protein	11.4556	23.6206	-1.04399	12.1649	0.730045		11.4556	0.0187795	9.25268	11.4369	0.921984		23.6206	0.0187795	10.2967	23.6018	0.983763
KO:K01537	E3.6.3.8; Ca2+-transporting ATPase [EC:3.6.3.8]	494.504	297.96	0.730861	196.543	0.691858		494.504	170.376	1.53726	324.128	0.858258		297.96	170.376	0.8064	127.584	0.780223			KO:K09765	queH; epoxyqueuosine reductase [EC:1.17.99.6]	16.6634	59.2337	-1.82973	42.5702	0.842988		16.6634	5.14632	1.69507	11.5171	0.798819		59.2337	5.14632	3.5248	54.0873	0.901981
KO:K01539	ATP1A; sodium/potassium-transporting ATPase subunit alpha [EC:3.6.3.9]	1.69779	0.171285	3.30918	1.5265	0.404723		1.69779	0.0187795	6.49835	1.67901	0.524096		0.171285	0.0187795	3.18917	0.152506	0.308921			KO:K09767	yajQ; cyclic-di-GMP-binding protein	72.708	4.62269	3.97531	68.0853	0.865826		72.708	0.0187795	11.9187	72.6892	0.999791		4.62269	0.0187795	7.94343	4.60391	0.721208
KO:K01546	kdpA; K+-transporting ATPase ATPase A chain [EC:3.6.3.12]	0.0284763	0.403729	-3.82556	0.375253	0.2862		NA	NA	NA	NA	NA		0.403729	0.0187795	4.42616	0.38495	0.308921			KO:K09772	sepF; cell division inhibitor SepF	89.4647	29.5113	1.60005	59.9535	0.83993		89.4647	0.0187795	12.2179	89.4459	0.999906		29.5113	0.0187795	10.6179	29.4925	0.992333
KO:K01547	kdpB; K+-transporting ATPase ATPase B chain [EC:3.6.3.12]	0.0284763	0.501154	-4.13742	0.472677	0.2862		NA	NA	NA	NA	NA		0.501154	0.0187795	4.73802	0.482374	0.308921			KO:K09773	ppsR; [pyruvate, water dikinase]-phosphate phosphotransferase / [pyruvate, water dikinase] kinase [EC:2.7.4.28 2.7.11.33]	29.5716	6.18742	2.2568	23.3842	0.844517		29.5716	0.0187795	10.6208	29.5529	0.993749		6.18742	0.0187795	8.36404	6.16864	0.803623
KO:K01548	kdpC; K+-transporting ATPase ATPase C chain [EC:3.6.3.12]	0.0284763	0.635661	-4.48042	0.607184	0.2862		NA	NA	NA	NA	NA		0.635661	0.0187795	5.08103	0.616881	0.308921			KO:K09776	K09776; uncharacterized protein	36.5083	84.6935	-1.21403	48.1852	0.796737		36.5083	5.34038	2.77321	31.1679	0.89101		84.6935	5.34038	3.98724	79.3531	0.902603
KO:K01551	arsA, ASNA1; arsenite-transporting ATPase [EC:3.6.3.16]	302.314	232.5	0.378818	69.8141	0.546494		302.314	897.591	-1.57001	595.277	0.85829		232.5	897.591	-1.94883	665.091	0.886307			KO:K09777	K09777; uncharacterized protein	41.2455	71.9589	-0.802934	30.7133	0.708239		41.2455	0.305676	7.07609	40.9399	0.984811		71.9589	0.305676	7.87902	71.6532	0.997374
KO:K01555	FAH, fahA; fumarylacetoacetase [EC:3.7.1.2]	11.7753	11.1716	0.0759284	0.603703	0.2862		11.7753	0.136527	6.43043	11.6388	0.889829		11.1716	0.136527	6.3545	11.0351	0.878675			KO:K09780	K09780; uncharacterized protein	25.6072	24.0748	0.0890248	1.53238	0.311891		25.6072	155.213	-2.59963	129.606	0.895934		24.0748	155.213	-2.68866	131.138	0.900703
KO:K01556	KYNU, kynU; kynureninase [EC:3.7.1.3]	56.7122	29.3602	0.949797	27.352	0.727756		56.7122	0.0187795	11.5603	56.6934	0.999561		29.3602	0.0187795	10.6105	29.3414	0.992333			KO:K09792	K09792; uncharacterized protein	10.0643	5.08839	0.983971	4.97595	0.530434		10.0643	0.0187795	9.06588	10.0456	0.908708		5.08839	0.0187795	8.08191	5.06961	0.766729
KO:K01560	E3.8.1.2; 2-haloacid dehalogenase [EC:3.8.1.2]	56.4174	95.886	-0.765181	39.4687	0.705941		56.4174	319.003	-2.49936	262.585	0.893791		95.886	319.003	-1.73418	223.117	0.882567			KO:K09797	K09797; uncharacterized protein	21.1295	0.0284763	9.53528	21.101	0.984681		21.1295	0.0187795	10.1359	21.1107	0.982218		NA	NA	NA	NA	NA
KO:K01561	dehH; haloacetate dehalogenase [EC:3.8.1.3]	31.2416	0.23817	7.03533	31.0034	0.989248		31.2416	0.0187795	10.7001	31.2228	0.994982		0.23817	0.0187795	3.66477	0.219391	0.308921			KO:K09798	K09798; uncharacterized protein	7.74702	22.515	-1.53917	14.768	0.772361		7.74702	0.0187795	8.68834	7.72824	0.852666		22.515	0.0187795	10.2275	22.4962	0.981489
KO:K01563	dhaA; haloalkane dehalogenase [EC:3.8.1.5]	43.1791	4.81662	3.16424	38.3624	0.863839		43.1791	0.0187795	11.167	43.1603	0.998766		4.81662	0.0187795	8.00272	4.79784	0.721208			KO:K09822	K09822; uncharacterized protein	32.439	0.0284763	10.1538	32.4105	0.996582		32.439	0.0187795	10.7544	32.4202	0.995463		NA	NA	NA	NA	NA
KO:K01565	SGSH; N-sulfoglucosamine sulfohydrolase [EC:3.10.1.1]	1.3345	2.76816	-1.05263	1.43366	0.404723		1.3345	0.741019	0.848719	0.593483	0.348547		2.76816	0.741019	1.90135	2.02714	0.504056			KO:K09833	HPT, HGGT, ubiA; homogentisate phytyltransferase / homogentisate geranylgeranyltransferase [EC:2.5.1.115 2.5.1.116]	17.4667	0.0284763	9.26063	17.4383	0.971445		17.4667	0.0187795	9.86124	17.448	0.968085		NA	NA	NA	NA	NA
KO:K01567	pdaA; peptidoglycan-N-acetylmuramic acid deacetylase [EC:3.5.1.-]	0.104513	0.0284763	1.87585	0.0760365	0.2862		0.104513	0.0187795	2.47645	0.0857333	0.348547		NA	NA	NA	NA	NA			KO:K09834	VTE1, SXD1; tocopherol cyclase [EC:5.5.1.24]	11.5193	0.0284763	8.66007	11.4908	0.927269		11.5193	0.0187795	9.26068	11.5005	0.921984		NA	NA	NA	NA	NA
KO:K01571	oadA; oxaloacetate decarboxylase, alpha subunit [EC:4.1.1.3]	67.9591	136.448	-1.00562	68.4891	0.787583		67.9591	60.2545	0.173598	7.70462	0.46521		136.448	60.2545	1.17921	76.1938	0.847397			KO:K09835	crtISO, crtH; prolycopene isomerase [EC:5.2.1.13]	83.3598	2.77971	4.90635	80.5801	0.865865		83.3598	0.0187795	12.116	83.3411	0.999864		2.77971	0.0187795	7.20963	2.76093	0.588898
KO:K01572	oadB; oxaloacetate decarboxylase, beta subunit [EC:4.1.1.3]	61.5179	13.3822	2.20069	48.1356	0.855298		61.5179	0.0187795	11.6776	61.4991	0.999665		13.3822	0.0187795	9.47695	13.3634	0.935135			KO:K09836	crtW; beta-carotene ketolase (CrtW type)	10.3734	0.0284763	8.50891	10.3449	0.914784		10.3734	0.0187795	9.10951	10.3546	0.908708		NA	NA	NA	NA	NA
KO:K01574	adc; acetoacetate decarboxylase [EC:4.1.1.4]	0.697969	4.67221	-2.74287	3.97424	0.56643		0.697969	63.0936	-6.49819	62.3956	0.967499		4.67221	63.0936	-3.75532	58.4214	0.902192			KO:K09879	crtU; isorenieratene synthase	13.8943	0.0284763	8.93052	13.8658	0.94663		13.8943	0.0187795	9.53112	13.8755	0.942578		NA	NA	NA	NA	NA
KO:K01575	alsD, budA, aldC; acetolactate decarboxylase [EC:4.1.1.5]	0.0284763	1.67882	-5.88154	1.65035	0.494595		NA	NA	NA	NA	NA		1.67882	0.0187795	6.48215	1.66004	0.482345			KO:K09888	zapA; cell division protein ZapA	23.0925	30.9036	-0.420352	7.81112	0.516449		23.0925	0.0187795	10.2641	23.0737	0.986159		30.9036	0.0187795	10.6844	30.8848	0.993142
KO:K01576	mdlC; benzoylformate decarboxylase [EC:4.1.1.7]	83.0915	46.1574	0.848139	36.9341	0.722302		83.0915	0.483554	7.42488	82.6079	0.994062		46.1574	0.483554	6.57674	45.6738	0.965041			KO:K09914	K09914; putative lipoprotein	20.5782	0.0284763	9.49714	20.5497	0.982187		20.5782	0.0187795	10.0977	20.5594	0.979615		NA	NA	NA	NA	NA
KO:K01578	MLYCD; malonyl-CoA decarboxylase [EC:4.1.1.9]	3.39177	0.0284763	6.89613	3.3633	0.693553		3.39177	0.0187795	7.49674	3.37299	0.695944		NA	NA	NA	NA	NA			KO:K09919	K09919; uncharacterized protein	42.9356	0.259735	7.36899	42.6759	0.995997		42.9356	0.0187795	11.1588	42.9169	0.998578		0.259735	0.0187795	3.78981	0.240956	0.308921
KO:K01579	panD; aspartate 1-decarboxylase [EC:4.1.1.11]	103.358	164.482	-0.670289	61.1248	0.679256		103.358	171.433	-0.729999	68.0752	0.753805		164.482	171.433	-0.0597103	6.95044	0.347784			KO:K09927	K09927; uncharacterized protein	21.2037	0.0284763	9.54034	21.1753	0.984681		21.2037	0.0187795	10.1409	21.1849	0.982218		NA	NA	NA	NA	NA
KO:K01580	E4.1.1.15, gadB, gadA, GAD; glutamate decarboxylase [EC:4.1.1.15]	1.09394	0.0284763	5.26363	1.06546	0.494595		1.09394	0.0187795	5.86423	1.07516	0.524096		NA	NA	NA	NA	NA			KO:K09928	K09928; uncharacterized protein	28.0988	4.60241	2.61005	23.4964	0.852191		28.0988	0.0187795	10.5471	28.0801	0.99285		4.60241	0.0187795	7.93709	4.58363	0.721208
KO:K01581	E4.1.1.17, ODC1, speC, speF; ornithine decarboxylase [EC:4.1.1.17]	8.52382	14.0782	-0.723891	5.55438	0.542452		8.52382	4.6003	0.88977	3.92351	0.539734		14.0782	4.6003	1.61366	9.47789	0.763318			KO:K09931	K09931; uncharacterized protein	18.9952	4.42246	2.10271	14.5727	0.809077		18.9952	0.0187795	9.98226	18.9764	0.972413		4.42246	0.0187795	7.87955	4.40368	0.721208
KO:K01582	E4.1.1.18, ldcC, cadA; lysine decarboxylase [EC:4.1.1.18]	14.6162	13.462	0.118681	1.15426	0.317335		14.6162	0.0187795	9.6042	14.5975	0.950951		13.462	0.0187795	9.48552	13.4432	0.935135			KO:K09933	mtfA; MtfA peptidase	3.95495	45.5996	-3.52729	41.6447	0.864696		3.95495	0.0187795	7.71836	3.93617	0.695944		45.5996	0.0187795	11.2456	45.5808	0.998675
KO:K01583	E4.1.1.19; arginine decarboxylase [EC:4.1.1.19]	25.6319	0.447864	5.83874	25.1841	0.947312		25.6319	0.0187795	10.4146	25.6132	0.989233		0.447864	0.0187795	4.57583	0.429084	0.308921			KO:K09935	K09935; uncharacterized protein	13.8401	0.0284763	8.92488	13.8116	0.94663		13.8401	0.0187795	9.52548	13.8213	0.942578		NA	NA	NA	NA	NA
KO:K01584	adiA; arginine decarboxylase [EC:4.1.1.19]	0.589388	0.760889	-0.368467	0.171501	0.2862		0.589388	0.0187795	4.97199	0.570609	0.348547		0.760889	0.0187795	5.34046	0.742109	0.308921			KO:K09936	TC.BAT2; bacterial/archaeal transporter family-2 protein	10.5739	4.76229	1.15078	5.81163	0.61119		10.5739	0.0187795	9.13714	10.5551	0.908708		4.76229	0.0187795	7.98635	4.74351	0.721208
KO:K01585	speA; arginine decarboxylase [EC:4.1.1.19]	100.697	31.5734	1.67324	69.124	0.840261		100.697	0.0187795	12.3886	100.679	0.999948		31.5734	0.0187795	10.7153	31.5546	0.993939			KO:K09942	K09942; uncharacterized protein	52.9366	8.25298	2.68128	44.6836	0.862729		52.9366	0.0187795	11.4609	52.9178	0.999446		8.25298	0.0187795	8.77962	8.2342	0.858335
KO:K01586	lysA; diaminopimelate decarboxylase [EC:4.1.1.20]	231.617	199.572	0.214828	32.0444	0.429402		231.617	132.705	0.803514	98.9114	0.770907		199.572	132.705	0.588686	66.867	0.729789			KO:K09949	K09949; uncharacterized protein	37.624	54.6737	-0.539195	17.0497	0.609768		37.624	5.36535	2.80991	32.2586	0.892682		54.6737	5.36535	3.3491	49.3084	0.901665
KO:K01588	purE; 5-(carboxyamino)imidazole ribonucleotide mutase [EC:5.4.99.18]	204.865	202.754	0.0149413	2.11074	0.286833		204.865	153.055	0.420623	51.8099	0.652227		202.754	153.055	0.405682	49.6991	0.624713			KO:K09966	K09966; uncharacterized protein	38.247	0.0284763	10.3914	38.2186	0.998393		38.247	0.0187795	10.992	38.2283	0.997669		NA	NA	NA	NA	NA
KO:K01589	purK; 5-(carboxyamino)imidazole ribonucleotide synthase [EC:6.3.4.18]	231.516	133.542	0.79382	97.9742	0.711346		231.516	85.9939	1.42881	145.522	0.856701		133.542	85.9939	0.634987	47.5481	0.735944			KO:K09967	K09967; uncharacterized protein	18.9251	5.5172	1.77829	13.4079	0.788946		18.9251	0.0187795	9.97693	18.9063	0.972413		5.5172	0.0187795	8.19864	5.49842	0.766729
KO:K01590	hdc, HDC; histidine decarboxylase [EC:4.1.1.22]	1.05331	0.0284763	5.20903	1.02483	0.494595		1.05331	0.0187795	5.80963	1.03453	0.524096		NA	NA	NA	NA	NA			KO:K09969	aapJ, bztA; general L-amino acid transport system substrate-binding protein	104.397	12.3288	3.08198	92.0682	0.865446		104.397	0.0187795	12.4406	104.378	0.999958		12.3288	0.0187795	9.35865	12.31	0.924912
KO:K01591	pyrF; orotidine-5'-phosphate decarboxylase [EC:4.1.1.23]	220.994	279.979	-0.341315	58.9856	0.524445		220.994	334.572	-0.598312	113.578	0.730786		279.979	334.572	-0.256997	54.5927	0.537444			KO:K09970	aapQ, bztB; general L-amino acid transport system permease protein	72.6754	12.2139	2.57295	60.4615	0.860645		72.6754	0.0187795	11.9181	72.6566	0.999791		12.2139	0.0187795	9.34515	12.1951	0.924912
KO:K01593	DDC, TDC; aromatic-L-amino-acid decarboxylase [EC:4.1.1.28]	23.8939	14.2889	0.741743	9.60494	0.626412		23.8939	0.0187795	10.3133	23.8751	0.986159		14.2889	0.0187795	9.57152	14.2701	0.944033			KO:K09971	aapM, bztC; general L-amino acid transport system permease protein	60.4646	12.5029	2.27382	47.9617	0.855298		60.4646	0.0187795	11.6527	60.4458	0.999624		12.5029	0.0187795	9.37889	12.4842	0.924912
KO:K01595	ppc; phosphoenolpyruvate carboxylase [EC:4.1.1.31]	255.569	137.97	0.889356	117.599	0.729704		255.569	430.035	-0.750742	174.466	0.76544		137.97	430.035	-1.6401	292.065	0.882052			KO:K09988	K09988; uncharacterized protein	22.5088	0.296995	6.24391	22.2118	0.969712		22.5088	0.0187795	10.2271	22.49	0.98411		0.296995	0.0187795	3.98321	0.278215	0.308921
KO:K01596	E4.1.1.32, pckA, PCK; phosphoenolpyruvate carboxykinase (GTP) [EC:4.1.1.32]	65.6625	83.4638	-0.346082	17.8014	0.524211		65.6625	184.071	-1.48712	118.409	0.857913		83.4638	184.071	-1.14104	100.607	0.844865			KO:K09994	phnO; aminoalkylphosphonate N-acetyltransferase [EC:2.3.1.-]	0.0284763	21.9859	-9.5926	21.9575	0.984681		NA	NA	NA	NA	NA		21.9859	0.0187795	10.1932	21.9672	0.978781
KO:K01597	MVD, mvaD; diphosphomevalonate decarboxylase [EC:4.1.1.33]	78.8815	62.2827	0.340856	16.5988	0.518192		78.8815	209.058	-1.40614	130.176	0.85484		62.2827	209.058	-1.747	146.775	0.883365			KO:K10026	queE; 7-carboxy-7-deazaguanine synthase [EC:4.3.99.3]	31.0372	67.2195	-1.11488	36.1823	0.788586		31.0372	1.31082	4.56546	29.7264	0.891783		67.2195	1.31082	5.68034	65.9087	0.902368
KO:K01598	PPCDC, coaC; phosphopantothenoylcysteine decarboxylase [EC:4.1.1.36]	4.95782	0.479583	3.36985	4.47824	0.618777		4.95782	0.0187795	8.04441	4.93905	0.749843		0.479583	0.0187795	4.67455	0.460804	0.308921			KO:K10046	GME; GDP-D-mannose 3', 5'-epimerase [EC:5.1.3.18 5.1.3.-]	0.124608	0.173668	-0.478929	0.0490594	0.2862		0.124608	36.0268	-8.17553	35.9022	0.995923		0.173668	36.0268	-7.6966	35.8532	0.990715
KO:K01599	hemE, UROD; uroporphyrinogen decarboxylase [EC:4.1.1.37]	388.608	719.484	-0.888647	330.876	0.729704		388.608	1028.11	-1.40361	639.506	0.85484		719.484	1028.11	-0.514965	308.63	0.687304			KO:K10108	malE; maltose/maltodextrin transport system substrate-binding protein	4.52299	52.7813	-3.54468	48.2583	0.865261		4.52299	0.0187795	7.91198	4.50421	0.749843		52.7813	0.0187795	11.4567	52.7625	0.999261
KO:K01601	rbcL; ribulose-bisphosphate carboxylase large chain [EC:4.1.1.39]	78.2717	55.4322	0.497767	22.8395	0.604733		78.2717	1.06437	6.20042	77.2074	0.967656		55.4322	1.06437	5.70266	54.3679	0.902098			KO:K10109	malF; maltose/maltodextrin transport system permease protein	2.48089	32.1244	-3.69474	29.6435	0.861083		2.48089	0.0187795	7.04556	2.46211	0.624409		32.1244	0.0187795	10.7403	32.1056	0.994689
KO:K01602	rbcS; ribulose-bisphosphate carboxylase small chain [EC:4.1.1.39]	48.2138	15.8638	1.60371	32.35	0.836726		48.2138	0.0187795	11.3261	48.1951	0.999247		15.8638	0.0187795	9.72237	15.845	0.951864			KO:K10110	malG; maltose/maltodextrin transport system permease protein	1.17286	32.8702	-4.80868	31.6973	0.862125		1.17286	0.0187795	5.96473	1.15408	0.524096		32.8702	0.0187795	10.7734	32.8514	0.994689
KO:K01607	pcaC; 4-carboxymuconolactone decarboxylase [EC:4.1.1.44]	29.7906	32.1575	-0.110297	2.36689	0.330989		29.7906	0.0187795	10.6315	29.7718	0.993749		32.1575	0.0187795	10.7418	32.1387	0.994689			KO:K10150	cysO; cysteine synthase / O-phosphoserine sulfhydrylase / cystathionine beta-synthase [EC:2.5.1.47 2.5.1.65 4.2.1.22]	0.493021	4.04314	-3.03576	3.55012	0.56643		0.493021	62.6278	-6.98901	62.1348	0.986347		4.04314	62.6278	-3.95325	58.5846	0.902227
KO:K01608	gcl; tartronate-semialdehyde synthase [EC:4.1.1.47]	3.48006	0.249287	3.80324	3.23078	0.56643		3.48006	0.0187795	7.53381	3.46129	0.695944		0.249287	0.0187795	3.73058	0.230507	0.308921			KO:K10189	lacF, araP; lactose/L-arabinose transport system permease protein	49.4133	6.98093	2.82341	42.4323	0.863703		49.4133	0.0187795	11.3615	49.3945	0.999289		6.98093	0.0187795	8.53812	6.96215	0.803623
KO:K01609	trpC; indole-3-glycerol phosphate synthase [EC:4.1.1.48]	223.76	251.393	-0.167997	27.6338	0.399961		223.76	282.391	-0.335746	58.6317	0.602781		251.393	282.391	-0.167749	30.9979	0.453623			KO:K10196	ABC.GLC.S; glucose/arabinose transport system substrate-binding protein	1.20468	1.83039	-0.603497	0.625705	0.2862		1.20468	53.9161	-5.48399	52.7114	0.897481		1.83039	53.9161	-4.8805	52.0857	0.902028
KO:K01610	E4.1.1.49, pckA; phosphoenolpyruvate carboxykinase (ATP) [EC:4.1.1.49]	173.933	152.531	0.189434	21.4026	0.417267		173.933	25.775	2.75449	148.158	0.896028		152.531	25.775	2.56506	126.756	0.899097			KO:K10197	ABC.GLC.P; glucose/arabinose transport system permease protein	0.816885	0.429894	0.926153	0.386991	0.2862		0.816885	53.9161	-6.04444	53.0992	0.96729		0.429894	53.9161	-6.97059	53.4862	0.986905
KO:K01611	speD, AMD1; S-adenosylmethionine decarboxylase [EC:4.1.1.50]	122.161	298.456	-1.28873	176.295	0.803233		122.161	718.467	-2.55614	596.306	0.893791		298.456	718.467	-1.2674	420.011	0.852978			KO:K10198	ABC.GLC.P1; glucose/arabinose transport system permease protein	0.408442	0.429894	-0.0738472	0.0214513	0.2862		0.408442	53.9161	-7.04444	53.5076	0.986138		0.429894	53.9161	-6.97059	53.4862	0.986905
KO:K01613	psd, PISD; phosphatidylserine decarboxylase [EC:4.1.1.65]	150.272	95.2185	0.658264	55.0536	0.678058		150.272	16.6171	3.17684	133.655	0.897867		95.2185	16.6171	2.51857	78.6014	0.898933			KO:K10202	ABC.NGC.P1; N-acetylglucosamine transport system permease protein	24.2388	0.147023	7.36513	24.0917	0.98731		24.2388	0.0187795	10.3339	24.22	0.98779		0.147023	0.0187795	2.96881	0.128243	0.308921
KO:K01615	gcdA; glutaconyl-CoA decarboxylase [EC:4.1.1.70]	6.26351	0.825156	2.92423	5.43835	0.661765		6.26351	0.0187795	8.38167	6.24473	0.826406		0.825156	0.0187795	5.45744	0.806377	0.308921			KO:K10210	crtP; diapolycopene oxygenase [EC:1.14.99.44]	16.4234	0.115763	7.14844	16.3077	0.96345		16.4234	0.0187795	9.77238	16.4047	0.963255		0.115763	0.0187795	2.62394	0.0969831	0.308921
KO:K01617	dmpH, xylI, nahK; 2-oxo-3-hexenedioate decarboxylase [EC:4.1.1.77]	3.94979	11.6057	-1.55499	7.65595	0.681418		3.94979	0.0187795	7.71648	3.93101	0.695944		11.6057	0.0187795	9.27147	11.587	0.912298			KO:K10216	dmpD, xylF; 2-hydroxymuconate-semialdehyde hydrolase [EC:3.7.1.9]	25.2895	39.3546	-0.637994	14.0651	0.64142		25.2895	0.719804	5.13479	24.5697	0.885825		39.3546	0.719804	5.77278	38.6348	0.96381
KO:K01619	deoC, DERA; deoxyribose-phosphate aldolase [EC:4.1.2.4]	237.78	231.031	0.0415454	6.74973	0.30074		237.78	351.769	-0.564997	113.988	0.700794		231.031	351.769	-0.606543	120.738	0.732649			KO:K10217	dmpC, xylG, praB; aminomuconate-semialdehyde/2-hydroxymuconate-6-semialdehyde dehydrogenase [EC:1.2.1.32 1.2.1.85]	46.3136	46.1096	0.00637079	0.204065	0.2862		46.3136	0.263637	7.45674	46.05	0.993299		46.1096	0.263637	7.45037	45.8459	0.993118
KO:K01620	ltaE; threonine aldolase [EC:4.1.2.48]	252.187	229.313	0.137178	22.8743	0.376675		252.187	34.5785	2.86655	217.609	0.897219		229.313	34.5785	2.72937	194.735	0.900785			KO:K10231	kojP; kojibiose phosphorylase [EC:2.4.1.230]	32.0036	12.7108	1.33218	19.2928	0.791459		32.0036	0.106113	8.23648	31.8975	0.994062		12.7108	0.106113	6.9043	12.6047	0.912532
KO:K01621	xfp, xpk; xylulose-5-phosphate/fructose-6-phosphate phosphoketolase [EC:4.1.2.9 4.1.2.22]	38.2353	7.26097	2.39667	30.9743	0.856175		38.2353	0.0187795	10.9915	38.2165	0.997669		7.26097	0.0187795	8.59486	7.24219	0.833798			KO:K10232	aglE, ggtB; alpha-glucoside transport system substrate-binding protein	31.8221	11.766	1.4354	20.0561	0.798179		31.8221	0.0187795	10.7267	31.8034	0.994982		11.766	0.0187795	9.29125	11.7472	0.912298
KO:K01622	K01622; fructose 1,6-bisphosphate aldolase/phosphatase [EC:4.1.2.13 3.1.3.11]	105.031	252.197	-1.26373	147.165	0.802824		105.031	544.802	-2.37491	439.771	0.893592		252.197	544.802	-1.11118	292.606	0.842767			KO:K10233	aglF, ggtC; alpha-glucoside transport system permease protein	42.1677	13.0676	1.69015	29.1001	0.835713		42.1677	0.0187795	11.1328	42.1489	0.998578		13.0676	0.0187795	9.44262	13.0488	0.935135
KO:K01623	ALDO; fructose-bisphosphate aldolase, class I [EC:4.1.2.13]	6.55987	0.0284763	7.84776	6.53139	0.829431		6.55987	0.0187795	8.44837	6.54109	0.826406		NA	NA	NA	NA	NA			KO:K10234	aglG, ggtD; alpha-glucoside transport system permease protein	32.8879	20.1433	0.707257	12.7446	0.641917		32.8879	0.0187795	10.7742	32.8691	0.995463		20.1433	0.0187795	10.0669	20.1245	0.975733
KO:K01624	FBA, fbaA; fructose-bisphosphate aldolase, class II [EC:4.1.2.13]	110.223	125.215	-0.183989	14.9925	0.405902		110.223	22.7593	2.27589	87.4634	0.888919		125.215	22.7593	2.45988	102.456	0.899062			KO:K10255	FAD6, desA; acyl-lipid omega-6 desaturase (Delta-12 desaturase) [EC:1.14.19.23 1.14.19.45]	12.0067	3.67616	1.70756	8.33049	0.724328		12.0067	0.0187795	9.32046	11.9879	0.921995		3.67616	0.0187795	7.6129	3.65738	0.663283
KO:K01625	eda; 2-dehydro-3-deoxyphosphogluconate aldolase / (4S)-4-hydroxy-2-oxoglutarate aldolase [EC:4.1.2.14 4.1.3.42]	75.2487	38.0949	0.982069	37.1538	0.732402		75.2487	9.29111	3.01774	65.9576	0.897345		38.0949	9.29111	2.03568	28.8038	0.885358			KO:K10536	aguA; agmatine deiminase [EC:3.5.3.12]	63.5271	32.2951	0.976054	31.2319	0.730503		63.5271	292.934	-2.20513	229.407	0.888919		32.2951	292.934	-3.18119	260.639	0.902427
KO:K01626	E2.5.1.54, aroF, aroG, aroH; 3-deoxy-7-phosphoheptulonate synthase [EC:2.5.1.54]	101.852	0.0284763	11.8044	101.823	1		101.852	0.0187795	12.405	101.833	0.999948		NA	NA	NA	NA	NA			KO:K10548	ABC.GGU.A, gguA; putative multiple sugar transport system ATP-binding protein [EC:3.6.3.17]	16.953	0.0284763	9.21756	16.9245	0.966332		16.953	0.0187795	9.81817	16.9342	0.963255		NA	NA	NA	NA	NA
KO:K01627	kdsA; 2-dehydro-3-deoxyphosphooctonate aldolase (KDO 8-P synthase) [EC:2.5.1.55]	109.213	149.907	-0.456924	40.6941	0.592579		109.213	109.55	-0.00444461	0.33698	0.348547		149.907	109.55	0.452479	40.3572	0.657538			KO:K10549	alsB; D-allose transport system substrate-binding protein	10.9587	2.88289	1.92649	8.07582	0.727561		10.9587	0.0187795	9.18871	10.9399	0.908708		2.88289	0.0187795	7.26221	2.86411	0.588898
KO:K01628	fucA; L-fuculose-phosphate aldolase [EC:4.1.2.17]	101.51	228.36	-1.16969	126.85	0.796241		101.51	220.772	-1.12093	119.262	0.837121		228.36	220.772	0.0487576	7.58876	0.33939			KO:K10563	mutM, fpg; formamidopyrimidine-DNA glycosylase [EC:3.2.2.23 4.2.99.18]	150.386	187.226	-0.316108	36.8396	0.516439		150.386	12.3422	3.607	138.044	0.898024		187.226	12.3422	3.92311	174.884	0.902755
KO:K01629	rhaD; rhamnulose-1-phosphate aldolase [EC:4.1.2.19]	24.6121	0.133546	7.52589	24.4786	0.988937		24.6121	0.0187795	10.356	24.5933	0.98779		0.133546	0.0187795	2.8301	0.114766	0.308921			KO:K10622	cmtD, dhbB; HCOMODA/2-hydroxy-3-carboxy-muconic semialdehyde decarboxylase [EC:4.1.1.-]	2.72611	23.0402	-3.07924	20.3141	0.847643		2.72611	0.0187795	7.18155	2.70733	0.624409		23.0402	0.0187795	10.2608	23.0214	0.983763
KO:K01630	garL; 2-dehydro-3-deoxyglucarate aldolase [EC:4.1.2.20]	32.887	4.70745	2.8045	28.1796	0.858171		32.887	95.9118	-1.54419	63.0248	0.857976		4.70745	95.9118	-4.34869	91.2044	0.902696			KO:K10697	rpaA; two-component system, OmpR family, response regulator RpaA	40.6821	0.0284763	10.4804	40.6536	0.998685		40.6821	0.0187795	11.081	40.6633	0.99815		NA	NA	NA	NA	NA
KO:K01631	dgoA; 2-dehydro-3-deoxyphosphogalactonate aldolase [EC:4.1.2.21]	1.04063	0.135047	2.94592	0.90558	0.2862		1.04063	0.0187795	5.79215	1.02185	0.524096		0.135047	0.0187795	2.84623	0.116267	0.308921			KO:K10700	ebdA; ethylbenzene hydroxylase subunit alpha [EC:1.17.99.2]	2.23369	42.249	-4.24141	40.0153	0.864599		2.23369	1.28705	0.795367	0.946646	0.348547		42.249	1.28705	5.03678	40.9619	0.900715
KO:K01633	folB; 7,8-dihydroneopterin aldolase/epimerase/oxygenase [EC:4.1.2.25 5.1.99.8 1.13.11.81]	127.742	100.94	0.339735	26.802	0.52315		127.742	63.3965	1.01076	64.3454	0.833211		100.94	63.3965	0.671022	37.5434	0.742614			KO:K10701	apc; acetophenone carboxylase [EC:6.4.1.8]	0.288119	15.5864	-5.75748	15.2983	0.916527		0.288119	0.0187795	3.93943	0.269339	0.348547		15.5864	0.0187795	9.69692	15.5676	0.951864
KO:K01634	SGPL1, DPL1; sphinganine-1-phosphate aldolase [EC:4.1.2.27]	0.652547	0.0284763	4.51825	0.624071	0.2862		0.652547	0.0187795	5.11885	0.633768	0.348547		NA	NA	NA	NA	NA			KO:K10770	ALKBH8; alkylated DNA repair protein alkB homolog 8 [EC:1.14.11.- 2.1.1.229]	0.685586	1.7491	-1.3512	1.06351	0.404723		0.685586	38.2271	-5.80111	37.5415	0.965221		1.7491	38.2271	-4.44991	36.478	0.899519
KO:K01635	lacD; tagatose 1,6-diphosphate aldolase [EC:4.1.2.40]	51.0377	35.1059	0.539853	15.9319	0.603224		51.0377	60.5709	-0.24706	9.53312	0.517217		35.1059	60.5709	-0.786912	25.465	0.762931			KO:K10778	ada; AraC family transcriptional regulator, regulatory protein of adaptative response / methylated-DNA-[protein]-cysteine methyltransferase [EC:2.1.1.63]	55.2461	25.1047	1.13792	30.1414	0.789375		55.2461	0.0187795	11.5225	55.2273	0.99955		25.1047	0.0187795	10.3846	25.0859	0.987702
KO:K01637	E4.1.3.1, aceA; isocitrate lyase [EC:4.1.3.1]	136.186	103.354	0.397982	32.8319	0.553214		136.186	499.892	-1.87603	363.705	0.879385		103.354	499.892	-2.27401	396.537	0.895088			KO:K10794	prdB; D-proline reductase (dithiol) PrdB [EC:1.21.4.1]	32.5794	0.0284763	10.16	32.5509	0.996582		32.5794	0.0187795	10.7606	32.5606	0.995463		NA	NA	NA	NA	NA
KO:K01638	aceB, glcB; malate synthase [EC:2.3.3.9]	154.631	106.558	0.537194	48.0733	0.624416		154.631	592.936	-1.93905	438.305	0.879542		106.558	592.936	-2.47624	486.379	0.899097			KO:K10819	E2.7.13.3; histidine kinase [EC:2.7.13.3]	93.3233	19.3218	2.27201	74.0015	0.855941		93.3233	0.0187795	12.2789	93.3045	0.999937		19.3218	0.0187795	10.0069	19.303	0.972438
KO:K01639	E4.1.3.3, nanA, NPL; N-acetylneuraminate lyase [EC:4.1.3.3]	22.0882	48.6199	-1.13827	26.5317	0.786473		22.0882	316.62	-3.84141	294.532	0.898035		48.6199	316.62	-2.70313	268.001	0.900785			KO:K10844	ERCC2, XPD; DNA excision repair protein ERCC-2 [EC:3.6.4.12]	9.83475	15.3032	-0.63787	5.46842	0.53507		9.83475	121.144	-3.62269	111.309	0.898014		15.3032	121.144	-2.98482	105.84	0.901665
KO:K01640	E4.1.3.4, HMGCL, hmgL; hydroxymethylglutaryl-CoA lyase [EC:4.1.3.4]	134.174	77.7433	0.787312	56.4304	0.711112		134.174	38.683	1.79433	95.4906	0.876741		77.7433	38.683	1.00702	39.0602	0.837491			KO:K10854	acxB; acetone carboxylase, alpha subunit [EC:6.4.1.6]	19.7561	6.30649	1.64739	13.4496	0.787554		19.7561	0.0187795	10.0389	19.7373	0.976301		6.30649	0.0187795	8.39154	6.28771	0.803623
KO:K01641	E2.3.3.10; hydroxymethylglutaryl-CoA synthase [EC:2.3.3.10]	88.4232	99.2461	-0.166586	10.8229	0.39776		88.4232	449.026	-2.3443	360.603	0.893592		99.2461	449.026	-2.17772	349.78	0.894936			KO:K10855	acxA; acetone carboxylase, beta subunit [EC:6.4.1.6]	19.4533	5.94935	1.70921	13.5039	0.788167		19.4533	0.0187795	10.0166	19.4345	0.976301		5.94935	0.0187795	8.30743	5.93057	0.766729
KO:K01643	citF; citrate lyase subunit alpha / citrate CoA-transferase [EC:2.8.3.10]	0.0284763	0.493114	-4.11409	0.464638	0.2862		NA	NA	NA	NA	NA		0.493114	0.0187795	4.71469	0.474335	0.308921			KO:K10856	acxC; acetone carboxylase, gamma subunit [EC:6.4.1.6]	19.8197	4.06282	2.28639	15.7569	0.816878		19.8197	0.0187795	10.0436	19.801	0.976301		4.06282	0.0187795	7.75718	4.04404	0.721208
KO:K01644	citE; citrate lyase subunit beta / citryl-CoA lyase [EC:4.1.3.34]	38.8173	80.8088	-1.05781	41.9915	0.787446		38.8173	469.475	-3.59628	430.657	0.898024		80.8088	469.475	-2.53846	388.666	0.899097			KO:K10917	aphA; PadR family transcriptional regulator, regulatory protein AphA	6.08309	14.738	-1.27666	8.65491	0.690748		6.08309	0.0187795	8.3395	6.06431	0.826406		14.738	0.0187795	9.61617	14.7192	0.944033
KO:K01647	CS, gltA; citrate synthase [EC:2.3.3.1]	318.128	350.764	-0.140893	32.6359	0.376831		318.128	537.232	-0.755936	219.103	0.766151		350.764	537.232	-0.615043	186.467	0.734807			KO:K10944	pmoA-amoA; methane/ammonia monooxygenase subunit A [EC:1.14.18.3 1.14.99.39]	3.10707	52.5786	-4.08085	49.4715	0.865368		3.10707	2.50533	0.310552	0.601736	0.348547		52.5786	2.50533	4.3914	50.0732	0.901923
KO:K01648	ACLY; ATP citrate (pro-S)-lyase [EC:2.3.3.8]	0.235022	0.0284763	3.04496	0.206546	0.2862		0.235022	0.0187795	3.64557	0.216243	0.348547		NA	NA	NA	NA	NA			KO:K10960	chlP, bchP; geranylgeranyl diphosphate/geranylgeranyl-bacteriochlorophyllide a reductase [EC:1.3.1.83 1.3.1.111]	87.8776	26.5476	1.72691	61.33	0.840758		87.8776	0.0187795	12.1921	87.8588	0.999895		26.5476	0.0187795	10.4652	26.5288	0.989086
KO:K01649	leuA, IMS; 2-isopropylmalate synthase [EC:2.3.3.13]	387.099	495.841	-0.357174	108.742	0.538508		387.099	1403.59	-1.85835	1016.49	0.87903		495.841	1403.59	-1.50118	907.752	0.865604			KO:K10977	aksA; methanogen homocitrate synthase [EC:2.3.3.14 2.3.3.-]	14.3419	31.2821	-1.1251	16.9402	0.759758		14.3419	306.58	-4.41796	292.238	0.898035		31.2821	306.58	-3.29286	275.298	0.902427
KO:K01652	E2.2.1.6L, ilvB, ilvG, ilvI; acetolactate synthase I/II/III large subunit [EC:2.2.1.6]	324.725	447.674	-0.46323	122.949	0.593261		324.725	1207.71	-1.89498	882.982	0.879396		447.674	1207.71	-1.43175	760.033	0.864279			KO:K11068	hlyIII; hemolysin III	36.3284	4.54883	2.99753	31.7796	0.861658		36.3284	0.0187795	10.9177	36.3097	0.997198		4.54883	0.0187795	7.92019	4.53005	0.721208
KO:K01653	E2.2.1.6S, ilvH, ilvN; acetolactate synthase I/III small subunit [EC:2.2.1.6]	158.662	191.827	-0.27385	33.165	0.477006		158.662	96.7373	0.713809	61.9244	0.752488		191.827	96.7373	0.987659	95.0894	0.795088			KO:K11073	potF; putrescine transport system substrate-binding protein	0.846403	0.585437	0.531831	0.260966	0.2862		0.846403	60.7808	-6.16613	59.9344	0.967416		0.585437	60.7808	-6.69796	60.1954	0.965873
KO:K01654	E2.5.1.56, neuB; N-acetylneuraminate synthase [EC:2.5.1.56]	31.1914	23.8672	0.38612	7.3242	0.494936		31.1914	0.0187795	10.6978	31.1726	0.994982		23.8672	0.0187795	10.3117	23.8484	0.983763			KO:K11130	NOP10, NOLA3; H/ACA ribonucleoprotein complex subunit 3	1.98781	13.7778	-2.79309	11.79	0.791167		1.98781	226.379	-6.83141	224.391	0.986661		13.7778	226.379	-4.03832	212.601	0.902755
KO:K01655	LYS21, LYS20; homocitrate synthase [EC:2.3.3.14]	47.7359	33.8949	0.494004	13.8409	0.581301		47.7359	13.4763	1.82465	34.2596	0.875423		33.8949	13.4763	1.33064	20.4186	0.8366			KO:K11145	K11145; ribonuclease III family protein [EC:3.1.26.-]	21.8573	0.670083	5.02763	21.1872	0.850594		21.8573	0.0187795	10.1847	21.8385	0.982218		0.670083	0.0187795	5.15711	0.651304	0.308921
KO:K01656	TRP3; anthranilate synthase / indole-3-glycerol phosphate synthase [EC:4.1.3.27 4.1.1.48]	0.6957	0.71512	-0.0397206	0.0194203	0.2862		0.6957	0.0187795	5.21124	0.67692	0.348547		0.71512	0.0187795	5.25096	0.696341	0.308921			KO:K11209	yghU, yfcG; GSH-dependent disulfide-bond oxidoreductase [EC:1.8.4.-]	22.4998	0.124229	7.50076	22.3756	0.985489		22.4998	0.0187795	10.2265	22.481	0.98411		0.124229	0.0187795	2.72578	0.10545	0.308921
KO:K01657	trpE; anthranilate synthase component I [EC:4.1.3.27]	228.369	241.847	-0.082724	13.4774	0.329198		228.369	214.687	0.0891314	13.6819	0.409889		241.847	214.687	0.171855	27.1593	0.453423			KO:K11216	lsrK; autoinducer-2 kinase [EC:2.7.1.189]	21.1612	31.9836	-0.595914	10.8224	0.608931		21.1612	0.0187795	10.138	21.1424	0.982218		31.9836	0.0187795	10.734	31.9648	0.993939
KO:K01658	trpG; anthranilate synthase component II [EC:4.1.3.27]	196.844	204.506	-0.0550838	7.66107	0.31418		196.844	246.129	-0.322359	49.2846	0.594658		204.506	246.129	-0.267275	41.6235	0.541477			KO:K11263	bccA; acetyl-CoA/propionyl-CoA carboxylase, biotin carboxylase, biotin carboxyl carrier protein [EC:6.4.1.2 6.4.1.3 6.3.4.14]	69.3804	12.5292	2.46923	56.8512	0.860557		69.3804	0.0187795	11.8512	69.3616	0.99977		12.5292	0.0187795	9.38193	12.5104	0.924912
KO:K01659	prpC; 2-methylcitrate synthase [EC:2.3.3.5]	13.2631	16.5926	-0.323123	3.32951	0.41828		13.2631	0.0187795	9.46404	13.2443	0.942578		16.5926	0.0187795	9.78717	16.5738	0.958511			KO:K11325	K11325; L-cysteine/cystine lyase	22.9996	31.5247	-0.454871	8.52505	0.532051		22.9996	0.173499	7.05054	22.8261	0.970771		31.5247	0.173499	7.50541	31.3512	0.988382
KO:K01661	menB; naphthoate synthase [EC:4.1.3.36]	62.7715	70.2529	-0.162448	7.48141	0.385206		62.7715	14.4906	2.11499	48.2809	0.887612		70.2529	14.4906	2.27744	55.7623	0.894431			KO:K11329	rpaB; two-component system, OmpR family, response regulator RpaB	37.1198	0.0284763	10.3482	37.0914	0.998208		37.1198	0.0187795	10.9488	37.1011	0.997407		NA	NA	NA	NA	NA
KO:K01662	dxs; 1-deoxy-D-xylulose-5-phosphate synthase [EC:2.2.1.7]	110.09	126.899	-0.204991	16.8085	0.422		110.09	124.786	-0.180776	14.6963	0.483504		126.899	124.786	0.0242156	2.11221	0.315744			KO:K11332	nblR; two-component system, OmpR family, response regulator NblR	11.3069	0.0284763	8.63323	11.2785	0.927269		11.3069	0.0187795	9.23384	11.2882	0.921984		NA	NA	NA	NA	NA
KO:K01663	HIS7; glutamine amidotransferase / cyclase [EC:2.4.2.- 4.1.3.-]	6.63971	1.94661	1.77016	4.6931	0.606584		6.63971	0.12194	5.76687	6.51777	0.794679		1.94661	0.12194	3.99671	1.82467	0.418746			KO:K11333	bchX; 3,8-divinyl chlorophyllide a/chlorophyllide a reductase subunit X [EC:1.3.7.14 1.3.7.15]	49.6094	0.0284763	10.7666	49.5809	0.999455		49.6094	0.0187795	11.3672	49.5906	0.999289		NA	NA	NA	NA	NA
KO:K01664	pabA; para-aminobenzoate synthetase component II [EC:2.6.1.85]	48.113	77.1553	-0.68134	29.0424	0.681924		48.113	56.0477	-0.220229	7.93474	0.495599		77.1553	56.0477	0.46111	21.1076	0.651852			KO:K11334	bchY; 3,8-divinyl chlorophyllide a/chlorophyllide a reductase subunit Y [EC:1.3.7.14 1.3.7.15]	46.9021	0.0284763	10.6857	46.8737	0.99925		46.9021	0.0187795	11.2863	46.8834	0.999091		NA	NA	NA	NA	NA
KO:K01665	pabB; para-aminobenzoate synthetase component I [EC:2.6.1.85]	47.7592	63.7189	-0.415945	15.9598	0.565466		47.7592	79.7867	-0.740371	32.0275	0.760548		63.7189	79.7867	-0.324426	16.0678	0.571325			KO:K11335	bchZ; 3,8-divinyl chlorophyllide a/chlorophyllide a reductase subunit Z [EC:1.3.7.14 1.3.7.15]	51.8178	0.0284763	10.8295	51.7893	0.999542		51.8178	0.0187795	11.4301	51.799	0.999415		NA	NA	NA	NA	NA
KO:K01666	mhpE; 4-hydroxy 2-oxovalerate aldolase [EC:4.1.3.39]	51.7595	47.01	0.138854	4.74942	0.363352		51.7595	0.897789	5.8493	50.8617	0.967186		47.01	0.897789	5.71045	46.1123	0.901547			KO:K11336	bchF; 3-vinyl bacteriochlorophyllide hydratase [EC:4.2.1.165]	40.0228	0.0284763	10.4568	39.9943	0.998539		40.0228	0.0187795	11.0574	40.004	0.99815		NA	NA	NA	NA	NA
KO:K01667	tnaA; tryptophanase [EC:4.1.99.1]	135.906	159.779	-0.233478	23.8739	0.446952		135.906	99.8385	0.444936	36.067	0.657255		159.779	99.8385	0.678413	59.9409	0.749601			KO:K11337	bchC; bacteriochlorophyllide a dehydrogenase [EC:1.1.1.396]	50.8512	0.159192	8.31938	50.6921	0.999455		50.8512	0.0187795	11.4029	50.8325	0.999373		0.159192	0.0187795	3.08354	0.140412	0.308921
KO:K01668	E4.1.99.2; tyrosine phenol-lyase [EC:4.1.99.2]	37.9959	2.22894	4.09141	35.7669	0.863566		37.9959	0.211497	7.48906	37.7844	0.991616		2.22894	0.211497	3.39765	2.01745	0.504056			KO:K11390	CLYBL; citrate lyase subunit beta-like protein [EC:4.1.-.-]	13.9816	0.0284763	8.93956	13.9532	0.94663		13.9816	0.0187795	9.54016	13.9629	0.942578		NA	NA	NA	NA	NA
KO:K01669	phrB; deoxyribodipyrimidine photo-lyase [EC:4.1.99.3]	443.892	233.702	0.925539	210.19	0.732577		443.892	171.654	1.37071	272.238	0.854192		233.702	171.654	0.445166	62.0479	0.658464			KO:K11440	gbsB; choline dehydrogenase [EC:1.1.1.1]	2.91999	12.0986	-2.0508	9.17857	0.756038		2.91999	0.0187795	7.28066	2.90121	0.624409		12.0986	0.0187795	9.33146	12.0798	0.924912
KO:K01673	cynT, can; carbonic anhydrase [EC:4.2.1.1]	65.7852	59.5384	0.143942	6.24677	0.371484		65.7852	9.70081	2.76159	56.0844	0.895589		59.5384	9.70081	2.61764	49.8376	0.899766			KO:K11520	manS; two-component system, OmpR family, manganese sensing sensor histidine kinase [EC:2.7.13.3]	23.2066	0.0284763	9.67056	23.1781	0.988498		23.2066	0.0187795	10.2712	23.1878	0.986159		NA	NA	NA	NA	NA
KO:K01674	cah; carbonic anhydrase [EC:4.2.1.1]	0.0284763	0.210436	-2.88555	0.181959	0.2862		NA	NA	NA	NA	NA		0.210436	0.0187795	3.48615	0.191656	0.308921			KO:K11521	K11521, manR; two-component system, OmpR family, manganese sensing response regulator	34.0168	0.0284763	10.2223	33.9883	0.996932		34.0168	0.0187795	10.8229	33.998	0.996477		NA	NA	NA	NA	NA
KO:K01676	E4.2.1.2A, fumA, fumB; fumarate hydratase, class I [EC:4.2.1.2]	34.5508	37.8258	-0.13065	3.27498	0.350614		34.5508	0.333728	6.6939	34.2171	0.96429		37.8258	0.333728	6.82455	37.4921	0.984818			KO:K11522	pixG; two-component system, chemotaxis family, response regulator PixG	29.5095	0.0284763	10.0172	29.481	0.995179		29.5095	0.0187795	10.6178	29.4907	0.993749		NA	NA	NA	NA	NA
KO:K01677	E4.2.1.2AA, fumA; fumarate hydratase subunit alpha [EC:4.2.1.2]	27.0131	156.68	-2.53609	129.667	0.86084		27.0131	72.5033	-1.42439	45.4902	0.855718		156.68	72.5033	1.1117	84.1764	0.842673			KO:K11524	pixI; positive phototaxis protein PixI	14.38	0.0284763	8.98008	14.3515	0.953935		14.38	0.0187795	9.58069	14.3612	0.950951		NA	NA	NA	NA	NA
KO:K01678	E4.2.1.2AB, fumB; fumarate hydratase subunit beta [EC:4.2.1.2]	19.3731	129.404	-2.73976	110.031	0.863732		19.3731	73.727	-1.92814	54.3539	0.879061		129.404	73.727	0.811617	55.6769	0.779578			KO:K11525	pixJ; methyl-accepting chemotaxis protein PixJ	25.8371	0.0284763	9.82547	25.8087	0.991527		25.8371	0.0187795	10.4261	25.8184	0.989233		NA	NA	NA	NA	NA
KO:K01679	E4.2.1.2B, fumC; fumarate hydratase, class II [EC:4.2.1.2]	182.694	179.953	0.0218134	2.74154	0.289832		182.694	528.881	-1.53351	346.187	0.858248		179.953	528.881	-1.55533	348.929	0.865768			KO:K11526	pixL; two-component system, chemotaxis family, sensor histidine kinase and response regulator PixL	36.0557	0.0284763	10.3063	36.0272	0.997984		36.0557	0.0187795	10.9069	36.0369	0.997198		NA	NA	NA	NA	NA
KO:K01681	ACO, acnA; aconitate hydratase [EC:4.2.1.3]	360.341	370.019	-0.0382346	9.67752	0.300789		360.341	800.475	-1.15149	440.134	0.838909		370.019	800.475	-1.11326	430.456	0.842767			KO:K11527	K11527; two-component system, sensor histidine kinase and response regulator [EC:2.7.13.3]	54.1854	4.03596	3.74692	50.1494	0.865397		54.1854	0.0187795	11.4945	54.1666	0.999519		4.03596	0.0187795	7.74761	4.01718	0.721208
KO:K01682	acnB; aconitate hydratase 2 / 2-methylisocitrate dehydratase [EC:4.2.1.3 4.2.1.99]	62.8568	2.04218	4.94389	60.8146	0.865719		62.8568	0.0187795	11.7087	62.838	0.999686		2.04218	0.0187795	6.76481	2.0234	0.588898			KO:K11528	glmU; UDP-N-acetylglucosamine pyrophosphorylase [EC:2.7.7.23]	10.6235	13.6338	-0.359928	3.0103	0.423422		10.6235	0.0187795	9.14389	10.6047	0.908708		13.6338	0.0187795	9.50382	13.6151	0.935135
KO:K01683	araD; D-arabinonate dehydratase [EC:4.2.1.5]	15.3445	69.6484	-2.18237	54.3039	0.855571		15.3445	143.402	-3.22427	128.058	0.897867		69.6484	143.402	-1.0419	73.7537	0.839707			KO:K11532	glpX-SEBP; fructose-1,6-bisphosphatase II / sedoheptulose-1,7-bisphosphatase [EC:3.1.3.11 3.1.3.37]	38.061	0.0284763	10.3843	38.0325	0.998393		38.061	0.0187795	10.9849	38.0422	0.997669		NA	NA	NA	NA	NA
KO:K01684	dgoD; galactonate dehydratase [EC:4.2.1.6]	89.3793	150.374	-0.750545	60.9949	0.704684		89.3793	159.202	-0.83285	69.8231	0.777953		150.374	159.202	-0.0823053	8.82824	0.36714			KO:K11601	mntC; manganese transport system substrate-binding protein	14.7184	0.0284763	9.01364	14.6899	0.953935		14.7184	0.0187795	9.61425	14.6996	0.950951		NA	NA	NA	NA	NA
KO:K01685	uxaA; altronate hydrolase [EC:4.2.1.7]	25.4018	27.9981	-0.140399	2.59631	0.342511		25.4018	173.455	-2.77156	148.053	0.896028		27.9981	173.455	-2.63116	145.457	0.90068			KO:K11603	mntA; manganese transport system ATP-binding protein	16.9088	0.708715	4.57642	16.2001	0.832246		16.9088	0.0187795	9.8144	16.89	0.963255		0.708715	0.0187795	5.23798	0.689936	0.308921
KO:K01686	uxuA; mannonate dehydratase [EC:4.2.1.8]	26.415	5.77146	2.19435	20.6435	0.838118		26.415	0.0187795	10.458	26.3962	0.99056		5.77146	0.0187795	8.26364	5.75268	0.766729			KO:K11617	liaS; two-component system, NarL family, sensor histidine kinase LiaS [EC:2.7.13.3]	1.42529	0.341839	2.05987	1.08345	0.404723		1.42529	28.5999	-4.32668	27.1746	0.889881		0.341839	28.5999	-6.38655	28.2581	0.957608
KO:K01687	ilvD; dihydroxy-acid dehydratase [EC:4.2.1.9]	201.794	271.995	-0.430693	70.2005	0.581564		201.794	315.36	-0.644113	113.566	0.738271		271.995	315.36	-0.21342	43.3651	0.489355			KO:K11690	dctM; C4-dicarboxylate transporter, DctM subunit	17.8516	16.4848	0.114921	1.36685	0.315115		17.8516	0.0187795	9.89268	17.8329	0.968085		16.4848	0.0187795	9.77776	16.466	0.958511
KO:K01689	ENO, eno; enolase [EC:4.2.1.11]	305.773	423.226	-0.468967	117.453	0.596523		305.773	439.065	-0.521973	133.292	0.691031		423.226	439.065	-0.0530066	15.8391	0.339859			KO:K11707	troA, mntA, znuA; manganese/zinc/iron transport system substrate-binding protein	36.9851	71.7126	-0.955284	34.7275	0.73135		36.9851	11.6653	1.66472	25.3198	0.864823		71.7126	11.6653	2.62001	60.0474	0.900188
KO:K01690	edd; phosphogluconate dehydratase [EC:4.2.1.12]	0.0284763	0.13736	-2.27012	0.108883	0.2862		NA	NA	NA	NA	NA		0.13736	0.0187795	2.87073	0.11858	0.308921			KO:K11741	sugE; quaternary ammonium compound-resistance protein SugE	35.642	16.804	1.08477	18.838	0.76567		35.642	0.0187795	10.8902	35.6232	0.996843		16.804	0.0187795	9.80544	16.7853	0.958511
KO:K01692	paaF, echA; enoyl-CoA hydratase [EC:4.2.1.17]	76.5889	153.496	-1.003	76.9073	0.787622		76.5889	41.5303	0.882973	35.0587	0.781821		153.496	41.5303	1.88597	111.966	0.886108			KO:K11751	ushA; 5'-nucleotidase / UDP-sugar diphosphatase [EC:3.1.3.5 3.6.1.45]	32.2791	20.202	0.676104	12.0771	0.638605		32.2791	0.0187795	10.7472	32.2604	0.995463		20.202	0.0187795	10.0711	20.1832	0.975733
KO:K01693	hisB; imidazoleglycerol-phosphate dehydratase [EC:4.2.1.19]	199.916	226.812	-0.182104	26.8962	0.406934		199.916	326.469	-0.707552	126.553	0.752822		226.812	326.469	-0.525448	99.6569	0.692778			KO:K11780	cofG; FO synthase subunit 1 [EC:2.5.1.77]	13.3884	3.37692	1.98721	10.0115	0.760547		13.3884	0.0187795	9.47761	13.3696	0.942578		3.37692	0.0187795	7.49041	3.35814	0.663283
KO:K01694	TRP; tryptophan synthase [EC:4.2.1.20]	1.94435	1.43024	0.443028	0.514107	0.2862		1.94435	0.0187795	6.69399	1.92557	0.524096		1.43024	0.0187795	6.25096	1.41146	0.482345			KO:K11783	mqnB; futalosine hydrolase [EC:3.2.2.26]	16.4142	15.1559	0.115067	1.25833	0.317335		16.4142	0.0187795	9.77158	16.3955	0.963255		15.1559	0.0187795	9.65651	15.1371	0.951864
KO:K01695	trpA; tryptophan synthase alpha chain [EC:4.2.1.20]	241.143	266.804	-0.145888	25.6603	0.384788		241.143	325.628	-0.433335	84.485	0.655405		266.804	325.628	-0.287448	58.8246	0.555815			KO:K11921	cynR; LysR family transcriptional regulator, cyn operon transcriptional activator	11.9877	3.62938	1.72377	8.35837	0.724328		11.9877	0.0187795	9.31819	11.969	0.921984		3.62938	0.0187795	7.59442	3.6106	0.663283
KO:K01696	trpB; tryptophan synthase beta chain [EC:4.2.1.20]	254.734	263.729	-0.050061	8.99434	0.30745		254.734	336.282	-0.400677	81.5475	0.632166		263.729	336.282	-0.350616	72.5531	0.597702			KO:K11924	mntR; DtxR family transcriptional regulator, manganese transport regulator	1.99077	15.0622	-2.91954	13.0714	0.811541		1.99077	0.0187795	6.72802	1.97199	0.524096		15.0622	0.0187795	9.64756	15.0434	0.951864
KO:K01697	CBS; cystathionine beta-synthase [EC:4.2.1.22]	57.5299	57.1743	0.00894588	0.355628	0.2862		57.5299	24.1375	1.25303	33.3924	0.841146		57.1743	24.1375	1.24409	33.0367	0.847057			KO:K11927	rhlE; ATP-dependent RNA helicase RhlE [EC:3.6.4.13]	23.3631	0.12744	7.51827	23.2357	0.987242		23.3631	0.147951	7.30297	23.2152	0.97282		0.12744	0.147951	-0.215304	0.0205113	0.308921
KO:K01698	hemB, ALAD; porphobilinogen synthase [EC:4.2.1.24]	153.195	228.418	-0.576304	75.2226	0.66382		153.195	289.702	-0.919198	136.507	0.788344		228.418	289.702	-0.342894	61.284	0.591465			KO:K11928	putP; sodium/proline symporter	7.17459	24.2954	-1.75972	17.1208	0.813235		7.17459	0.174502	5.36158	7.00009	0.750909		24.2954	0.174502	7.1213	24.1209	0.973411
KO:K01699	pduC; propanediol dehydratase large subunit [EC:4.2.1.28]	3.90959	0.0284763	7.10111	3.88111	0.693553		3.90959	0.0187795	7.70172	3.89081	0.695944		NA	NA	NA	NA	NA			KO:K11942	icmF; isobutyryl-CoA mutase [EC:5.4.99.13]	20.1847	24.9592	-0.306309	4.7745	0.425857		20.1847	0.240629	6.39031	19.9441	0.944115		24.9592	0.240629	6.69662	24.7186	0.952169
KO:K01702	LEU1; 3-isopropylmalate dehydratase [EC:4.2.1.33]	0.0284763	7.54705	-8.05001	7.51858	0.857626		0.0187795	212.306	-13.4647	212.288	1		7.54705	212.306	-4.81409	204.759	0.902767			KO:K11950	cmpA; bicarbonate transport system substrate-binding protein	44.9906	0.0284763	10.6256	44.9621	0.999055		44.9906	0.0187795	11.2263	44.9718	0.998902		NA	NA	NA	NA	NA
KO:K01703	leuC, IPMI-L; 3-isopropylmalate/(R)-2-methylmalate dehydratase large subunit [EC:4.2.1.33 4.2.1.35]	287.476	295.488	-0.0396613	8.01265	0.300789		287.476	319.694	-0.153254	32.2187	0.462419		295.488	319.694	-0.113592	24.2061	0.395111			KO:K11951	cmpB; bicarbonate transport system permease protein	22.3055	0.0284763	9.61342	22.2771	0.986745		22.3055	0.0187795	10.214	22.2868	0.98411		NA	NA	NA	NA	NA
KO:K01704	leuD, IPMI-S; 3-isopropylmalate/(R)-2-methylmalate dehydratase small subunit [EC:4.2.1.33 4.2.1.35]	223.066	282.745	-0.342031	59.6791	0.524455		223.066	403.197	-0.854011	180.13	0.781737		282.745	403.197	-0.511981	120.451	0.687292			KO:K11952	cmpC; bicarbonate transport system ATP-binding protein [EC:3.6.3.-]	61.1336	0.0284763	11.068	61.1052	0.999815		61.1336	0.0187795	11.6686	61.1149	0.999665		NA	NA	NA	NA	NA
KO:K01706	gudD; glucarate dehydratase [EC:4.2.1.40]	8.47647	3.78468	1.16329	4.69179	0.576938		8.47647	0.816974	3.3751	7.6595	0.750909		3.78468	0.816974	2.21181	2.96771	0.504056			KO:K11953	cmpD; bicarbonate transport system ATP-binding protein [EC:3.6.3.-]	44.8388	0.0284763	10.6208	44.8104	0.999055		44.8388	0.0187795	11.2214	44.8201	0.998902		NA	NA	NA	NA	NA
KO:K01707	kdgD; 5-dehydro-4-deoxyglucarate dehydratase [EC:4.2.1.41]	0.731335	0.62158	0.234593	0.109755	0.2862		0.731335	0.0187795	5.2833	0.712556	0.348547		0.62158	0.0187795	5.04871	0.6028	0.308921			KO:K11954	K11954, natB; neutral amino acid transport system substrate-binding protein	26.6836	0.0284763	9.87198	26.6552	0.992725		26.6836	0.0187795	10.4726	26.6649	0.99056		NA	NA	NA	NA	NA
KO:K01708	garD; galactarate dehydratase [EC:4.2.1.42]	0.47066	0.146131	1.68742	0.324529	0.2862		0.47066	0.0187795	4.64746	0.45188	0.348547		0.146131	0.0187795	2.96003	0.127351	0.308921			KO:K11955	natC; neutral amino acid transport system permease protein	12.1331	0.0284763	8.73497	12.1046	0.93733		12.1331	0.0187795	9.33557	12.1143	0.93317		NA	NA	NA	NA	NA
KO:K01709	rfbG; CDP-glucose 4,6-dehydratase [EC:4.2.1.45]	25.0727	8.48556	1.56304	16.5872	0.784418		25.0727	15.7083	0.674592	9.36443	0.660025		8.48556	15.7083	-0.888447	7.22275	0.645803			KO:K11956	natD; neutral amino acid transport system permease protein	55.3016	20.1386	1.45736	35.163	0.814462		55.3016	344.563	-2.63937	289.261	0.895934		20.1386	344.563	-4.09673	324.424	0.902767
KO:K01710	E4.2.1.46, rfbB, rffG; dTDP-glucose 4,6-dehydratase [EC:4.2.1.46]	416.715	441.701	-0.0840089	24.9859	0.329275		416.715	368.052	0.179152	48.6631	0.4871		441.701	368.052	0.263161	73.649	0.537608			KO:K11957	K11957, natA; neutral amino acid transport system ATP-binding protein	37.2036	11.9356	1.64017	25.268	0.831749		37.2036	0.0187795	10.9521	37.1848	0.997407		11.9356	0.0187795	9.31189	11.9168	0.912298
KO:K01711	gmd, GMDS; GDPmannose 4,6-dehydratase [EC:4.2.1.47]	173.239	84.3239	1.03875	88.9148	0.787885		173.239	59.3251	1.54605	113.914	0.858279		84.3239	59.3251	0.507298	24.9988	0.679449			KO:K11958	natE; neutral amino acid transport system ATP-binding protein	26.609	12.6815	1.06919	13.9275	0.738878		26.609	0.0187795	10.4685	26.5902	0.99056		12.6815	0.0187795	9.39935	12.6627	0.924912
KO:K01712	hutU, UROC1; urocanate hydratase [EC:4.2.1.49]	61.0351	201.886	-1.72583	140.851	0.840943		61.0351	309.063	-2.34019	248.028	0.893592		201.886	309.063	-0.614358	107.177	0.732638			KO:K11962	urtD; urea transport system ATP-binding protein	19.1621	0.916752	4.38558	18.2453	0.841225		19.1621	0.0187795	9.99488	19.1433	0.976301		0.916752	0.0187795	5.6093	0.897973	0.308921
KO:K01713	pheC; cyclohexadienyl dehydratase [EC:4.2.1.51 4.2.1.91]	0.772578	0.0284763	4.76185	0.744102	0.2862		0.772578	0.0187795	5.36245	0.753799	0.348547		NA	NA	NA	NA	NA			KO:K12057	traF; conjugal transfer pilus assembly protein TraF	2.15128	15.3729	-2.83712	13.2216	0.811531		2.15128	0.0187795	6.83989	2.1325	0.624409		15.3729	0.0187795	9.67702	15.3541	0.951864
KO:K01714	dapA; 4-hydroxy-tetrahydrodipicolinate synthase [EC:4.3.3.7]	364.508	429.292	-0.236008	64.7839	0.453545		364.508	781.998	-1.10121	417.489	0.836295		429.292	781.998	-0.865205	352.705	0.788429			KO:K12060	traU; conjugal transfer pilus assembly protein TraU	4.06313	18.3968	-2.1788	14.3337	0.809982		4.06313	0.236979	4.09976	3.82615	0.59977		18.3968	0.236979	6.27855	18.1599	0.934748
KO:K01715	crt; enoyl-CoA hydratase [EC:4.2.1.17]	125.039	209.162	-0.742235	84.1222	0.704129		125.039	314.574	-1.33102	189.535	0.853889		209.162	314.574	-0.588782	105.412	0.730106			KO:K12061	traW; conjugal transfer pilus assembly protein TraW	3.29433	15.7867	-2.26065	12.4924	0.793592		3.29433	0.174543	4.23833	3.11979	0.59977		15.7867	0.174543	6.49898	15.6122	0.918242
KO:K01716	fabA; 3-hydroxyacyl-[acyl-carrier protein] dehydratase / trans-2-decenoyl-[acyl-carrier protein] isomerase [EC:4.2.1.59 5.3.3.14]	2.98759	0.0284763	6.71308	2.95911	0.613664		2.98759	0.0187795	7.31368	2.96881	0.624409		NA	NA	NA	NA	NA			KO:K12062	trbI; conjugal transfer pilin signal peptidase TrbI	2.80649	12.7933	-2.18856	9.98686	0.75672		2.80649	0.0187795	7.22347	2.78771	0.624409		12.7933	0.0187795	9.41202	12.7746	0.924912
KO:K01719	hemD, UROS; uroporphyrinogen-III synthase [EC:4.2.1.75]	75.7639	83.4971	-0.140215	7.7332	0.373266		75.7639	107.949	-0.51076	32.1846	0.68617		83.4971	107.949	-0.370545	24.4514	0.604056			KO:K12063	traC; conjugal transfer ATP-binding protein TraC	14.6871	42.3009	-1.52614	27.6138	0.811336		14.6871	0.414537	5.1469	14.2725	0.848986		42.3009	0.414537	6.67304	41.8864	0.964525
KO:K01720	prpD; 2-methylcitrate dehydratase [EC:4.2.1.79]	127.227	117.074	0.119985	10.153	0.358707		127.227	422.614	-1.73194	295.388	0.875946		117.074	422.614	-1.85193	305.541	0.885815			KO:K12064	traV; conjugal transfer pilus assembly protein TraV	2.06301	14.0301	-2.7657	11.9671	0.791167		2.06301	0.0187795	6.77945	2.04423	0.624409		14.0301	0.0187795	9.54515	14.0113	0.944033
KO:K01721	nthA; nitrile hydratase subunit alpha [EC:4.2.1.84]	2.24491	0.146029	3.94233	2.09888	0.496611		2.24491	0.0187795	6.90136	2.22613	0.624409		0.146029	0.0187795	2.95903	0.12725	0.308921			KO:K12067	traE; conjugal transfer pilus assembly protein TraE	1.78537	13.7892	-2.94924	12.0038	0.80225		1.78537	0.24683	2.85463	1.53854	0.454317		13.7892	0.24683	5.80387	13.5423	0.901512
KO:K01724	PCBD, phhB; 4a-hydroxytetrahydrobiopterin dehydratase [EC:4.2.1.96]	204.043	172.776	0.239968	31.2667	0.453253		204.043	222.317	-0.123743	18.2737	0.434163		172.776	222.317	-0.36371	49.5403	0.604842			KO:K12072	traH; conjugative transfer pilus assembly protein TraH	1.64153	13.0514	-2.99109	11.4098	0.792199		1.64153	0.0187795	6.44974	1.62275	0.524096		13.0514	0.0187795	9.44083	13.0326	0.935135
KO:K01725	cynS; cyanate lyase [EC:4.2.1.104]	0.0284763	0.337694	-3.56788	0.309218	0.2862		NA	NA	NA	NA	NA		0.337694	0.0187795	4.16849	0.318914	0.308921			KO:K12158	NEDD8; ubiquitin-like protein Nedd8	1.80207	16.436	-3.18914	14.6339	0.819624		1.80207	127.626	-6.14612	125.823	0.967813		16.436	127.626	-2.95699	111.19	0.901676
KO:K01728	pel; pectate lyase [EC:4.2.2.2]	1.11051	1.41818	-0.352822	0.307673	0.2862		1.11051	0.0187795	5.88592	1.09173	0.524096		1.41818	0.0187795	6.23874	1.3994	0.482345			KO:K12278	mshG; MSHA biogenesis protein MshG	50.6907	27.8781	0.862587	22.8126	0.713109		50.6907	0.649255	6.28679	50.0414	0.967186		27.8781	0.649255	5.4242	27.2289	0.892966
KO:K01729	algL; poly(beta-D-mannuronate) lyase [EC:4.2.2.3]	0.628735	1.17256	-0.899139	0.543826	0.2862		0.628735	0.0187795	5.06522	0.609956	0.348547		1.17256	0.0187795	5.96436	1.15378	0.482345			KO:K12282	mshL; MSHA biogenesis protein MshL	9.36741	19.1838	-1.03417	9.81638	0.697273		9.36741	0.0187795	8.96235	9.34863	0.893038		19.1838	0.0187795	9.99652	19.165	0.972438
KO:K01730	ogl; oligogalacturonide lyase [EC:4.2.2.6]	9.04423	56.5553	-2.64459	47.5111	0.862982		9.04423	236.427	-4.70826	227.383	0.898035		56.5553	236.427	-2.06366	179.872	0.894115			KO:K12283	mshM; MSHA biogenesis protein MshM	11.0359	2.97661	1.89047	8.05933	0.727561		11.0359	0.0187795	9.19884	11.0172	0.921984		2.97661	0.0187795	7.30837	2.95783	0.588898
KO:K01733	thrC; threonine synthase [EC:4.2.3.1]	437.265	729.607	-0.738613	292.342	0.704168		437.265	1383.51	-1.66175	946.244	0.875559		729.607	1383.51	-0.923141	653.902	0.792696			KO:K12369	dppB; dipeptide transport system permease protein	0.247792	0.284238	-0.197974	0.0364467	0.2862		0.247792	61.1201	-7.94638	60.8723	0.997094		0.284238	61.1201	-7.7484	60.8359	0.997151
KO:K01734	mgsA; methylglyoxal synthase [EC:4.2.3.3]	48.9404	46.6222	0.0700074	2.31815	0.315417		48.9404	22.2067	1.14003	26.7336	0.829417		46.6222	22.2067	1.07002	24.4155	0.82694			KO:K12448	UXE, uxe; UDP-arabinose 4-epimerase [EC:5.1.3.5]	40.1614	1.70441	4.55847	38.457	0.864307		40.1614	0.0187795	11.0624	40.1426	0.99815		1.70441	0.0187795	6.50397	1.68563	0.482345
KO:K01735	aroB; 3-dehydroquinate synthase [EC:4.2.3.4]	221.713	168.784	0.393518	52.9294	0.550584		221.713	89.9673	1.30122	131.746	0.846508		168.784	89.9673	0.907705	78.8167	0.791571			KO:K12452	ascC, ddhC, rfbH; CDP-4-dehydro-6-deoxyglucose reductase, E1 [EC:1.17.1.1]	21.6662	5.53456	1.96891	16.1317	0.811443		21.6662	0.0187795	10.1721	21.6474	0.982218		5.53456	0.0187795	8.20317	5.51578	0.766729
KO:K01736	aroC; chorismate synthase [EC:4.2.3.5]	276.053	238.753	0.209426	37.2999	0.42946		276.053	410.123	-0.571109	134.069	0.70162		238.753	410.123	-0.780534	171.369	0.773247			KO:K12524	thrA; bifunctional aspartokinase / homoserine dehydrogenase 1 [EC:2.7.2.4 1.1.1.3]	37.1051	39.8945	-0.104573	2.78941	0.32763		37.1051	0.0187795	10.9482	37.0863	0.997407		39.8945	0.0187795	11.0528	39.8757	0.997714
KO:K01737	queD, ptpS, PTS; 6-pyruvoyltetrahydropterin/6-carboxytetrahydropterin synthase [EC:4.2.3.12 4.1.2.50]	244.213	295.199	-0.27355	50.9865	0.477298		244.213	258.052	-0.0795216	13.8389	0.401223		295.199	258.052	0.194029	37.1475	0.474232			KO:K12527	ygfK; putative selenate reductase [EC:1.97.1.9]	9.62003	28.3259	-1.55801	18.7058	0.793261		9.62003	0.0187795	9.00074	9.60125	0.893038		28.3259	0.0187795	10.5587	28.3071	0.991243
KO:K01738	cysK; cysteine synthase A [EC:2.5.1.47]	142.182	205.227	-0.529486	63.0455	0.621358		142.182	343.519	-1.27266	201.338	0.846174		205.227	343.519	-0.74317	138.292	0.768054			KO:K12567	TTN; titin [EC:2.7.11.1]	45.1768	3.44179	3.71435	41.735	0.864735		45.1768	0.0187795	11.2322	45.158	0.999049		3.44179	0.0187795	7.51786	3.42301	0.663283
KO:K01739	metB; cystathionine gamma-synthase [EC:2.5.1.48]	205.388	92.2948	1.15403	113.093	0.793952		205.388	109.806	0.903397	95.5822	0.786337		92.2948	109.806	-0.250635	17.5111	0.518687			KO:K12733	PPIL1; peptidyl-prolyl cis-trans isomerase-like 1 [EC:5.2.1.8]	8.34391	17.3462	-1.05583	9.00232	0.697273		8.34391	0.0187795	8.79542	8.32513	0.87488		17.3462	0.0187795	9.85125	17.3275	0.963669
KO:K01740	metY; O-acetylhomoserine (thiol)-lyase [EC:2.5.1.49]	254.503	49.0533	2.37526	205.449	0.860479		254.503	0.0187795	13.7262	254.484	1		49.0533	0.0187795	11.351	49.0345	0.999086			KO:K12941	abgB; aminobenzoyl-glutamate utilization protein B	13.0662	21.4586	-0.715716	8.39238	0.600964		13.0662	0.348362	5.2291	12.7178	0.831225		21.4586	0.348362	5.94482	21.1102	0.945147
KO:K01741	E4.2.99.18; DNA-(apurinic or apyrimidinic site) lyase [EC:4.2.99.18]	0.419163	2.92364	-2.80218	2.50447	0.496611		0.419163	78.747	-7.55357	78.3278	0.994052		2.92364	78.747	-4.75139	75.8234	0.902591			KO:K12942	abgT; aminobenzoyl-glutamate transport protein	14.3693	4.501	1.67467	9.86829	0.742618		14.3693	0.0187795	9.57962	14.3505	0.950951		4.501	0.0187795	7.90494	4.48222	0.721208
KO:K01744	aspA; aspartate ammonia-lyase [EC:4.3.1.1]	118.952	73.6515	0.69159	45.3003	0.68582		118.952	1.74912	6.0876	117.203	0.967813		73.6515	1.74912	5.39601	71.9024	0.902497			KO:K12956	ctpV; copper-transporting P-type ATPase V [EC:3.6.3.54]	1.86029	46.8838	-4.65549	45.0235	0.865056		1.86029	101.451	-5.76911	99.5911	0.967761		46.8838	101.451	-1.11363	54.5676	0.842098
KO:K01745	hutH, HAL; histidine ammonia-lyase [EC:4.3.1.3]	58.3845	185.931	-1.67111	127.546	0.840349		58.3845	152.972	-1.38961	94.5877	0.854725		185.931	152.972	0.281495	32.9584	0.547843			KO:K13016	wbpB; UDP-N-acetyl-2-amino-2-deoxyglucuronate dehydrogenase [EC:1.1.1.335]	11.5868	5.78462	1.00219	5.80219	0.61119		11.5868	0.0187795	9.26911	11.568	0.921984		5.78462	0.0187795	8.26692	5.76584	0.766729
KO:K01746	E4.3.1.4; formiminotetrahydrofolate cyclodeaminase [EC:4.3.1.4]	6.59512	13.0263	-0.981958	6.43119	0.589053		6.59512	0.0187795	8.4561	6.57634	0.826406		13.0263	0.0187795	9.43805	13.0075	0.935135			KO:K13018	wbpD, wlbB; UDP-2-acetamido-3-amino-2,3-dideoxy-glucuronate N-acetyltransferase [EC:2.3.1.201]	83.7806	60.499	0.469705	23.2816	0.59215		83.7806	6.32996	3.72635	77.4507	0.897878		60.499	6.32996	3.25664	54.1691	0.901758
KO:K01749	hemC, HMBS; hydroxymethylbilane synthase [EC:2.5.1.61]	152.548	186.2	-0.28759	33.6521	0.48954		152.548	188.368	-0.304288	35.8197	0.574963		186.2	188.368	-0.0166981	2.16764	0.315744			KO:K13049	PM20D1; carboxypeptidase PM20D1 [EC:3.4.17.-]	8.4162	21.3431	-1.34253	12.9269	0.751247		8.4162	0.0187795	8.80787	8.39742	0.87488		21.3431	0.0187795	10.1504	21.3243	0.978781
KO:K01750	E4.3.1.12, ocd; ornithine cyclodeaminase [EC:4.3.1.12]	163.471	208.562	-0.351443	45.0912	0.529869		163.471	245.856	-0.588783	82.3856	0.729845		208.562	245.856	-0.237339	37.2944	0.516706			KO:K13276	bpr; bacillopeptidase F [EC:3.4.21.-]	27.1242	44.5526	-0.715928	17.4284	0.669605		27.1242	2.88427	3.2333	24.24	0.885658		44.5526	2.88427	3.94923	41.6684	0.900914
KO:K01751	E4.3.1.15; diaminopropionate ammonia-lyase [EC:4.3.1.15]	1.72676	0.0284763	5.92216	1.69828	0.494595		1.72676	0.0187795	6.52276	1.70798	0.524096		NA	NA	NA	NA	NA			KO:K13277	epr; minor extracellular protease Epr [EC:3.4.21.-]	5.33827	14.3669	-1.4283	9.02859	0.719264		5.33827	0.261257	4.35283	5.07701	0.691668		14.3669	0.261257	5.78113	14.1056	0.91041
KO:K01752	E4.3.1.17, sdaA, sdaB, tdcG; L-serine dehydratase [EC:4.3.1.17]	46.2251	38.7265	0.255352	7.49851	0.449182		46.2251	0.132201	8.4498	46.0928	0.998631		38.7265	0.132201	8.19444	38.5943	0.99653			KO:K13282	cphB; cyanophycinase [EC:3.4.15.6]	47.7805	11.2289	2.0892	36.5516	0.852961		47.7805	0.0187795	11.3131	47.7618	0.999195		11.2289	0.0187795	9.22385	11.2101	0.912298
KO:K01753	dsdA; D-serine dehydratase [EC:4.3.1.18]	0.0284763	0.350968	-3.62351	0.322492	0.2862		NA	NA	NA	NA	NA		0.350968	0.0187795	4.22411	0.332189	0.308921			KO:K13356	FAR; alcohol-forming fatty acyl-CoA reductase [EC:1.2.1.84]	0.112959	26.6518	-7.88229	26.5389	0.992024		0.112959	116.954	-10.0159	116.841	0.99999		26.6518	116.954	-2.13364	90.3022	0.894244
KO:K01754	E4.3.1.19, ilvA, tdcB; threonine dehydratase [EC:4.3.1.19]	242.71	188.698	0.363153	54.0118	0.538333		242.71	587.039	-1.27422	344.329	0.846174		188.698	587.039	-1.63738	398.341	0.882052			KO:K13479	ygeT, xdhB; xanthine dehydrogenase FAD-binding subunit [EC:1.17.1.4]	14.3911	48.5347	-1.75384	34.1436	0.838985		14.3911	0.0187795	9.5818	14.3723	0.950951		48.5347	0.0187795	11.3356	48.5159	0.99898
KO:K01755	argH, ASL; argininosuccinate lyase [EC:4.3.2.1]	305.327	292.111	0.0638406	13.2164	0.314277		305.327	357.467	-0.227457	52.1404	0.527284		292.111	357.467	-0.291297	65.3569	0.55585			KO:K13501	TRP1; anthranilate synthase / indole-3-glycerol phosphate synthase / phosphoribosylanthranilate isomerase [EC:4.1.3.27 4.1.1.48 5.3.1.24]	1.66744	12.9663	-2.95906	11.2989	0.792199		1.66744	0.0187795	6.47234	1.64867	0.524096		12.9663	0.0187795	9.4314	12.9476	0.924912
KO:K01756	purB, ADSL; adenylosuccinate lyase [EC:4.3.2.2]	303.232	402.882	-0.409935	99.6501	0.555376		303.232	404.13	-0.414397	100.898	0.633295		402.882	404.13	-0.00446128	1.24777	0.308968			KO:K13527	mpa; proteasome-associated ATPase	102.214	32.3243	1.6609	69.8898	0.840261		102.214	0.0187795	12.4102	102.195	0.999948		32.3243	0.0187795	10.7492	32.3055	0.994689
KO:K01758	CTH; cystathionine gamma-lyase [EC:4.4.1.1]	150.928	111.175	0.441023	39.7525	0.584418		150.928	23.235	2.69949	127.693	0.896028		111.175	23.235	2.25846	87.9402	0.895018			KO:K13541	cbiGH-cobJ; cobalt-precorrin 5A hydrolase / precorrin-3B C17-methyltransferase [EC:3.7.1.12 2.1.1.131]	97.3207	11.0745	3.1355	86.2462	0.865407		97.3207	0.0187795	12.3394	97.302	0.999948		11.0745	0.0187795	9.20387	11.0557	0.912298
KO:K01759	GLO1, gloA; lactoylglutathione lyase [EC:4.4.1.5]	35.129	12.0662	1.54169	23.0627	0.806311		35.129	0.314667	6.80269	34.8143	0.983138		12.0662	0.314667	5.26101	11.7516	0.815076			KO:K13571	pafA; proteasome accessory factor A [EC:6.3.1.19]	170.348	64.4639	1.40192	105.885	0.813021		170.348	0.0187795	13.147	170.33	1		64.4639	0.0187795	11.7451	64.4451	0.999578
KO:K01760	metC; cystathionine beta-lyase [EC:4.4.1.8]	34.1169	30.3695	0.167867	3.74747	0.367335		34.1169	0.660952	5.6898	33.456	0.893937		30.3695	0.660952	5.52193	29.7085	0.8951			KO:K13572	pafB; proteasome accessory factor B	32.501	3.12542	3.37836	29.3756	0.860995		32.501	0.0187795	10.7571	32.4823	0.995463		3.12542	0.0187795	7.37875	3.10664	0.663283
KO:K01761	E4.4.1.11; methionine-gamma-lyase [EC:4.4.1.11]	203.185	62.4131	1.70287	140.772	0.840914		203.185	22.9014	3.14928	180.283	0.897596		62.4131	22.9014	1.44641	39.5117	0.862204			KO:K13587	cckA; two-component system, cell cycle sensor histidine kinase and response regulator CckA [EC:2.7.13.3]	46.4671	11.8609	1.97	34.6062	0.842277		46.4671	0.0187795	11.2728	46.4483	0.999091		11.8609	0.0187795	9.30284	11.8421	0.912298
KO:K01766	csdA; cysteine sulfinate desulfinase [EC:4.4.1.-]	0.0802936	0.0284763	1.49552	0.0518173	0.2862		0.0802936	0.0187795	2.09613	0.0615141	0.348547		NA	NA	NA	NA	NA			KO:K13590	dgcB; diguanylate cyclase [EC:2.7.7.65]	28.2065	23.4977	0.263506	4.70876	0.417822		28.2065	0.0187795	10.5527	28.1877	0.99285		23.4977	0.0187795	10.2891	23.4789	0.983763
KO:K01768	E4.6.1.1; adenylate cyclase [EC:4.6.1.1]	246.39	164.063	0.586698	82.3276	0.663995		246.39	269.675	-0.130275	23.2844	0.444135		164.063	269.675	-0.716973	105.612	0.756589			KO:K13599	ntrX; two-component system, NtrC family, nitrogen regulation response regulator NtrX	26.1534	37.4904	-0.51952	11.337	0.57761		26.1534	0.471947	5.79223	25.6815	0.957046		37.4904	0.471947	6.31175	37.0184	0.963576
[truncated: 4,832 more rows]
